# Supplementary material
Source: publisher site journal article supplement (https://www.degruyterbrill.com/publication/isbn/9783110463927/downloadAsset/9783110463927_Extraktionen_Reduktionen_fallbezogen.zip)
Supplement: Supplementary file 1 [file I1 Extraktion und Reduktion.pdf › fallbezogene Extraktionen und Reduktionen/I1 Extraktion und Reduktion.pdf]

# I1 Extraktion

| <b>TÄTIGKEITEN UND EDV-ERFAHRUNG</b>                                                       |                                                                                            |                                                                                                                                                              |                                |               |                                                                                                                                    |
|--------------------------------------------------------------------------------------------|--------------------------------------------------------------------------------------------|--------------------------------------------------------------------------------------------------------------------------------------------------------------|--------------------------------|---------------|------------------------------------------------------------------------------------------------------------------------------------|
| <b>Tätigkeiten</b>                                                                         |                                                                                            |                                                                                                                                                              |                                |               |                                                                                                                                    |
| <i>Gegenstände</i>                                                                         | <i>Methoden/Verfahren</i>                                                                  | <i>Ziele/Fragen</i>                                                                                                                                          | <i>Institutioneller Rahmen</i> | <i>Quelle</i> |                                                                                                                                    |
| Erforschung von Methoden zur digitalen Textbearbeitung, digitale Texte, digitale Editionen | Textauszeichnung, digitales Edieren, digitale Textanalyse, Algorithmen zum Textverständnis | Textedition, Textverständnis                                                                                                                                 | Universität                    | \I1-1\        |                                                                                                                                    |
| <b>Erfahrung</b>                                                                           |                                                                                            |                                                                                                                                                              |                                |               |                                                                                                                                    |
|                                                                                            | <i>Beschreibung</i>                                                                        | <i>Bewertung</i>                                                                                                                                             |                                | <i>Quelle</i> |                                                                                                                                    |
|                                                                                            | arbeitet seit Mitte der 1990er im Bereich DH                                               | hohe Affinität, große Erfahrung                                                                                                                              |                                | \I1-1\        |                                                                                                                                    |
| <b>BEDARFSKATEGORIEN</b>                                                                   |                                                                                            |                                                                                                                                                              |                                |               |                                                                                                                                    |
| <b>K 1 Bedienbarkeit</b>                                                                   |                                                                                            |                                                                                                                                                              |                                |               |                                                                                                                                    |
| <i>Benennung</i>                                                                           | <i>Beschreibung</i>                                                                        | <i>Bewertung</i>                                                                                                                                             | <i>Bezug</i>                   | <i>Quelle</i> | <i>Reduktion</i>                                                                                                                   |
| selbst thematisiert                                                                        | Benutzerführung im XML-Editor, weniger Optionen zur Auswahl                                | stringente Benutzerführung, kein Eingeben von Schemata, man kommt schnell zur eigentlichen Nutzung des Editors (trifft mittlerweile teilweise nicht mehr zu) |                                | \I1-3\        | K 1.1d mit mehr EDV-Erfahrung (z.B. mit Eclipse) schnell erlernbar und gut bedienbar<br><br><b>Benutzerführung / Erlernbarkeit</b> |
| selbst thematisiert                                                                        | Fehlerkorrektur                                                                            | schwierig bis unmöglich                                                                                                                                      |                                | \I1-7\        | K 1.1c Fehlerrückmeldung/ Fehlerkorrektur problematisch, keine Rücksetzfunktion<br><br><b>Benutzerführung / Erlernbarkeit</b>      |
| vom Interviewer thematisiert                                                               | Eclipse als Plattform und                                                                  | für jemanden, der                                                                                                                                            |                                | \I1-9\        | K 1.1.a                                                                                                                            |

## I1 Extraktion

|                              |                                          |                                                                                                                      |                   |         |                                                                                                                                                                                                                                                |
|------------------------------|------------------------------------------|----------------------------------------------------------------------------------------------------------------------|-------------------|---------|------------------------------------------------------------------------------------------------------------------------------------------------------------------------------------------------------------------------------------------------|
|                              | Nutzung digitaler Werkzeuge              | herkömmlich analog ediert hat ist die Lernkurve hoch, aus meiner Sicht ist es bedienbar und in kurzer Zeit erlernbar |                   |         | zu schwierig/ technisch für fachwissenschaftliche Nutzer, steile Lernkurve für herkömmlich Edierende<br>K 1.1.d<br>mit mehr EDV-Erfahrung (z.B. mit Eclipse) schnell erlernbar und gut bedienbar<br><br><b>Benutzerführung / Erlernbarkeit</b> |
| vom Interviewer thematisiert | Darstellung der Rechercheergebnisse      | Trefferliste übersichtlich, Lesbarkeit abhängig von der Konfiguration der Oberfläche                                 | Rezeption/Zugriff | \I1-10\ | K 1.2a<br>Oberfläche ist übersichtlich, sachlich<br><br><b>Orientierung / Übersichtlichkeit / Oberflächengestaltung</b>                                                                                                                        |
| vom Interviewer thematisiert | manchmal ist etwas nicht mehr sichtbar   | verbesserungswürdig                                                                                                  | Rezeption/Zugriff | \I1-16\ | K 1.2b<br>Lesbarkeit/ Sichtbarkeit am Bildschirm je nach Konfiguration nicht immer gut<br><br><b>Orientierung / Übersichtlichkeit / Oberflächengestaltung</b>                                                                                  |
| vom Interviewer thematisiert | sachliche, nüchterne optische Gestaltung | positiv                                                                                                              | Rezeption/Zugriff | \I1-16\ | K 1.2a<br>Oberfläche ist übersichtlich, sachlich<br><br><b>Orientierung /</b>                                                                                                                                                                  |

## I1 Extraktion

|                                  |                                                                                                                                                                                          |                                                                  |              |               | <b>Übersichtlichkeit /<br/>Oberflächengestaltung</b>                                                                                                                                                                                                                                                |
|----------------------------------|------------------------------------------------------------------------------------------------------------------------------------------------------------------------------------------|------------------------------------------------------------------|--------------|---------------|-----------------------------------------------------------------------------------------------------------------------------------------------------------------------------------------------------------------------------------------------------------------------------------------------------|
| <b>K 2<br/>Rezeption/Zugriff</b> |                                                                                                                                                                                          |                                                                  |              |               |                                                                                                                                                                                                                                                                                                     |
| <i>Benennung</i>                 | <i>Beschreibung</i>                                                                                                                                                                      | <i>Bewertung</i>                                                 | <i>Bezug</i> | <i>Quelle</i> | <i>Reduktion</i>                                                                                                                                                                                                                                                                                    |
| selbst thematisiert              | Zugriff auf<br>Recherchemöglichkeiten,<br>Repositories                                                                                                                                   | neue Möglichkeiten<br>(positiv bewertet),<br>Stärke von TextGrid |              | \I1-2\        | K 2.1a<br>kostenloser Zugriff auf<br>unterschiedliche<br>Repositorien bzw.<br>Ressourcen (z.B.<br>Wörterbücher), Quellen und<br>Ausgaben/ Editionen,<br>Vergleichsmöglichkeiten<br>mit anderen Projekten/<br>Quellen, orts- und<br>rechnerunabhängiger<br>Zugriff<br><br><b>Zugriff auf Inhalte</b> |
| selbst thematisiert              | auf Repositories<br>zugreifen, auf andere<br>Daten zugreifen und die<br>sofort in der eigenen<br>Arbeitsumgebung haben,<br>ohne dass man sich darum<br>kümmern muss, wo sie<br>herkommen | wirklich stark, neu                                              |              | \I1-4\        | K 2.1c<br>nicht rein rezeptiver,<br>sondern auch produktiver,<br>„schreibender“ Zugriff,<br>auch in der eigenen<br>Forschungsumgebung, auch<br>auf den Quellcode<br><br><b>Zugriff auf Inhalte</b>                                                                                                  |
| selbst thematisiert              | Zugriff auf Daten im<br>Repository                                                                                                                                                       | Stärke                                                           |              | \I1-15\       | K 2.1a<br>kostenloser Zugriff auf<br>unterschiedliche<br>Repositorien bzw.                                                                                                                                                                                                                          |

## I1 Extraktion

|                                        |                                                                                               |                                                                                  |                           |               |                                                                                                                                                                                                  |
|----------------------------------------|-----------------------------------------------------------------------------------------------|----------------------------------------------------------------------------------|---------------------------|---------------|--------------------------------------------------------------------------------------------------------------------------------------------------------------------------------------------------|
|                                        |                                                                                               |                                                                                  |                           |               | Ressourcen (z.B. Wörterbücher), Quellen und Ausgaben/ Editionen, Vergleichsmöglichkeiten mit anderen Projekten/ Quellen, orts- und rechnerunabhängiger Zugriff<br><br><b>Zugriff auf Inhalte</b> |
| <b>K 3<br/>Produktion/Manipulation</b> |                                                                                               |                                                                                  |                           |               |                                                                                                                                                                                                  |
| <i>Benennung</i>                       | <i>Beschreibung</i>                                                                           | <i>Bewertung</i>                                                                 | <i>Bezug</i>              | <i>Quelle</i> | <i>Reduktion</i>                                                                                                                                                                                 |
| selbst thematisiert                    | XML-Editor, einer von vielen                                                                  | nicht die Stärke von TextGrid, zu sehr Schwerpunkt im Workshop                   |                           | \I1-2\        | K 3.1a<br>eigener XML-Editor ist nicht die Stärke von TextGrid, andere sind besser, nicht der richtige Schwerpunkt<br><br><b>XML-Produktion</b>                                                  |
| vom Interviewer thematisiert           | Darstellung von Vernetzungen durch Visualisierung, Semantic Web, vom Community-Input abhängig | steckt möglicherweise Potenzial drin, besser, je mehr Daten zur Verfügung stehen | Kollaboration/Kooperation | \I1-13\       | K 3.3b<br>Visualisierung von Beziehungen (z. B. in Briefnetzen), Mustererkennung<br><br><b>Visualisierung</b>                                                                                    |
| selbst thematisiert                    | kostenlos                                                                                     | positiv                                                                          |                           | \I1-15\       | K 3.4a<br>Arbeitsumgebung mit Tool-Angebot, nicht alles neu /selbst programmieren,                                                                                                               |

## I1 Extraktion

|                                          |                                                                                                                                                                                                  |                  |               |               |                                                                                                                                                                      |
|------------------------------------------|--------------------------------------------------------------------------------------------------------------------------------------------------------------------------------------------------|------------------|---------------|---------------|----------------------------------------------------------------------------------------------------------------------------------------------------------------------|
|                                          |                                                                                                                                                                                                  |                  |               |               | kostenlos<br><br><b>Produktionsunterstützung<br/>allgemein</b>                                                                                                       |
| <b>K 4<br/>Modularität/Anpassbarkeit</b> |                                                                                                                                                                                                  |                  |               |               |                                                                                                                                                                      |
| <i>Benennung</i>                         | <i>Beschreibung</i>                                                                                                                                                                              | <i>Bewertung</i> | <i>Bezug</i>  | <i>Quelle</i> | <i>Reduktion</i>                                                                                                                                                     |
| selbst thematisiert                      | kein "stand alone"-<br>Produkt, mit anderen<br>Anwendungen verknüpft                                                                                                                             | neu, positiv     |               | \I1-4\        | K 4.2a<br>Anschließbarkeit und<br>Kombinierbarkeit von Tools<br>und Services, auch von<br>selbstentwickelten –<br>modulares Konzept<br><br><b>Tools und Services</b> |
| vom Interviewer thematisiert             | Aufgaben entsprechend<br>Dinge zusammenstellen,<br>je nach Phase eines<br>Projekts z.B. Kodierung<br>vs. Visualisierung, wie<br>bei einer<br>Programmierungsumgebung,<br>Vordergrund/Hintergrund | schätze ich      | Bedienbarkeit | \I1-6\        | K 4.1a<br>Anpassung der<br>Oberflächenkonfiguration<br><br><b>TextGrid-Oberfläche /<br/>Umgebung</b>                                                                 |
| selbst thematisiert                      | aktuelle Entwicklung,<br>keine Altlasten,<br>Erweiterbarkeit,<br>Modularisierung,<br>Möglichkeit der<br>Einbindung von Tools                                                                     | sehr schick      |               | \I1-15\       | K 4.2a<br>Anschließbarkeit und<br>Kombinierbarkeit von Tools<br>und Services, auch von<br>selbstentwickelten –<br>modulares Konzept<br><br><b>Tools und Services</b> |

## I1 Extraktion

| <b>K 5<br/>Kollaboration/Kooperation</b>                  |                                                                                                                                                                                         |                                                                                                |                         |               |                                                                                                                                                                                          |
|-----------------------------------------------------------|-----------------------------------------------------------------------------------------------------------------------------------------------------------------------------------------|------------------------------------------------------------------------------------------------|-------------------------|---------------|------------------------------------------------------------------------------------------------------------------------------------------------------------------------------------------|
| <i>Benennung</i>                                          | <i>Beschreibung</i>                                                                                                                                                                     | <i>Bewertung</i>                                                                               | <i>Bezug</i>            | <i>Quelle</i> | <i>Reduktion</i>                                                                                                                                                                         |
| vom Interviewer thematisiert, vom Befragten konkretisiert | sehr komplexe Projekte nicht durch einzelne machbar, Zusammenarbeit in Teams, Einfluss auf Ergebnisse, Austausch von Arbeitsergebnissen über eine Plattform von verschiedenen Orten aus | sehr hohes Potential, Trend, geisteswissenschaften tun sich schwer, für Ergebnisse viel besser | Organisation/Verwaltung | \I1-11\       | K 5.1b<br>Austausch von Arbeits- bzw. Forschungsergebnissen, Bereitschaft dazu<br><br><b>Austausch von Inhalten und Werkzeugen</b>                                                       |
| vom Interviewer thematisiert, vom Befragten konkretisiert | Social-Anwendungen, Video-Konferenz                                                                                                                                                     | keine hohe Priorität, besser über Schnittstellen anbinden                                      | Organisation/Verwaltung | \I1-11\       | K 5.2a<br>Zusammenarbeit in Teams von verschiedenen Orten aus, auch an einem Dokument, verteilte Bearbeitung verschiedener ‚Schichten‘ eines Dokuments usw.<br><br><b>Zusammenarbeit</b> |
| vom Interviewer thematisiert, vom Befragten konkretisiert | Zugriff auf Texte im Repository, Voraussetzung: viele Leute stellen viele Texte ein                                                                                                     | hohes Potential                                                                                | Rezeption/Zugriff       | \I1-12\       | K 5.3a<br>Partizipation/Nutzung als Voraussetzung<br><br><b>Community-Building-Aspekte</b>                                                                                               |
| selbst thematisiert                                       | Kollaboration                                                                                                                                                                           | Stärke, wenn es funktioniert                                                                   |                         | \I1-15\       | K 5.2a<br>Zusammenarbeit in Teams von verschiedenen Orten aus, auch an einem Dokument, verteilte Bearbeitung verschiedener                                                               |

## I1 Extraktion

|                                    |                                                                                                                                           |                         |                           |               |                                                                                                                                                                               |
|------------------------------------|-------------------------------------------------------------------------------------------------------------------------------------------|-------------------------|---------------------------|---------------|-------------------------------------------------------------------------------------------------------------------------------------------------------------------------------|
|                                    |                                                                                                                                           |                         |                           |               | ‚Schichten‘ eines Dokuments usw.<br><br><b>Zusammenarbeit</b>                                                                                                                 |
| selbst thematisiert                | Unabhängigkeit von Datenformaten, Einbeziehung von Standards wie TEI, Plattformunabhängigkeit                                             | Stärke                  |                           | \I1-15\       | K 5.1d Standards, TEI, Unabhängigkeit von Datenformaten<br><br><b>Austausch von Inhalten und Werkzeugen</b>                                                                   |
| <b>K 6 Organisation/Verwaltung</b> |                                                                                                                                           |                         |                           |               |                                                                                                                                                                               |
| <i>Benennung</i>                   | <i>Beschreibung</i>                                                                                                                       | <i>Bewertung</i>        | <i>Bezug</i>              | <i>Quelle</i> | <i>Reduktion</i>                                                                                                                                                              |
| selbst thematisiert                | Versionierung, in virtuellen Teams zusammenarbeiten, Wiederherstellung, Vergleich, Nachvollziehen der Bearbeitung von Dokumentenversionen | ganz wichtig            | Kollaboration/Kooperation | \I1-5\        | K 6.1a Versionenverwaltung<br><br><b>Organisation und Verwaltung von Inhalten</b>                                                                                             |
| selbst thematisiert                | Speicherung von Dateien, Verknüpfung Dokument-Schema                                                                                      | schwierig bis unmöglich | Bedienbarkeit             | \I1-7\        | K 6.1b Datenspeicherung und -verwaltung, Langzeitarchivierung, verbunden mit Bearbeitungsmöglichkeiten und Nachnutzung<br><br><b>Organisation und Verwaltung von Inhalten</b> |

## I1 Extraktion

|                                                           |                                                                                                           |                                                                                                                                          |                                          |         |                                                                                                                      |
|-----------------------------------------------------------|-----------------------------------------------------------------------------------------------------------|------------------------------------------------------------------------------------------------------------------------------------------|------------------------------------------|---------|----------------------------------------------------------------------------------------------------------------------|
| selbst thematisiert                                       | Zusammenarbeit mehrerer Leute an einem Dokument, Abbildung von Veränderungen                              | war problematisch, ist wichtig                                                                                                           | Kollaboration/Kooperation                | \I1-8\  | K 6.1a<br>Versionenverwaltung<br><br><b>Organisation und Verwaltung von Inhalten</b>                                 |
| vom Interviewer thematisiert, vom Befragten konkretisiert | konfigurierbare Workflowsteuerung, klar definierte Rollen, Freigabe von Arbeitsergebnissen, Versionierung | sehr wichtig, nicht ausgereift in TextGrid (mittlerweile fortgeschritten), zu wenig Hilfestellung, nichtrekonstruierbare Fehlermeldungen | Kollaboration/Kooperation, Bedienbarkeit | \I1-11\ | K 6.2a<br>Workflow-Organisation, Projekt-Verwaltung<br><br><b>Organisation und Verwaltung von Arbeitsprozessen</b>   |
| selbst thematisiert                                       | Offline-Arbeit und spätere Synchronisierung                                                               | derzeit Schwäche, hohe Bedeutung                                                                                                         | Produktion/Manipulation, Bedienbarkeit   | \I1-15\ | K 6.2b<br>Offline-Arbeit und spätere Synchronisierung<br><br><b>Organisation und Verwaltung von Arbeitsprozessen</b> |
