# Supplementary material
Source: publisher site journal article supplement (https://www.degruyterbrill.com/publication/isbn/9783110463927/downloadAsset/9783110463927_Extraktionen_Reduktionen_fallbezogen.zip)
Supplement: Supplementary file 2 [file I10 Extraktion und Reduktion.pdf › fallbezogene Extraktionen und Reduktionen/I10 Extraktion und Reduktion.pdf]

## I10 Extraktion

| <b>TÄTIGKEITEN UND EDV-ERFAHRUNG</b>                                                                                       |                                                                                                                                                                                 |                                                                                       |                                               |               |                                                                                    |
|----------------------------------------------------------------------------------------------------------------------------|---------------------------------------------------------------------------------------------------------------------------------------------------------------------------------|---------------------------------------------------------------------------------------|-----------------------------------------------|---------------|------------------------------------------------------------------------------------|
| <b>Tätigkeiten</b>                                                                                                         |                                                                                                                                                                                 |                                                                                       |                                               |               |                                                                                    |
| <i>Gegenstände</i>                                                                                                         | <i>Methoden/Verfahren</i>                                                                                                                                                       | <i>Ziele/Fragen</i>                                                                   | <i>Institutioneller Rahmen</i>                | <i>Quelle</i> |                                                                                    |
| Beratung für den EDV-Einsatz in Geisteswissenschaften, Lexikographie, Wörterbücher, Editionen, insb. Briefeditionsprojekte | Beratung, Wörterbücher aus elektronischen Ressourcen erarbeiten, Belege aus Textarchiv erheben, daraus Wörterbuchartikel erstellen, Edieren, digital gestützt und für den Druck | Publikation digitaler Wörterbücher, digitale und Print-Publikation von Briefeditionen | Universität, Forschungs- bzw. Editionsprojekt | \I10-1\       |                                                                                    |
| <b>Erfahrung</b>                                                                                                           |                                                                                                                                                                                 |                                                                                       |                                               |               |                                                                                    |
|                                                                                                                            | <i>Beschreibung</i>                                                                                                                                                             | <i>Bewertung</i>                                                                      |                                               | <i>Quelle</i> |                                                                                    |
|                                                                                                                            | EDV-Beraterin seit 13 Jahren, XML, digitale Lexikographie- und Editionstools                                                                                                    | lange Erfahrung, gute Kenntnisse, speziell XML für Lexikographie und Editionen        |                                               | \I10-1\       |                                                                                    |
|                                                                                                                            | Eclipse-Erfahrung                                                                                                                                                               | kennt und mag Eclipse                                                                 |                                               | \I10-3\       |                                                                                    |
|                                                                                                                            | Eclipse Erfahrung                                                                                                                                                               | Verwendet Eclipse für alle Programmierprojekte                                        |                                               | \I10-5\       |                                                                                    |
|                                                                                                                            | TUSTEP                                                                                                                                                                          | Viel Erfahrung, größtes Tool, meiste Funktionalität, aber schwierig                   |                                               | \I10-17\      |                                                                                    |
| <b>BEDARFSKATEGORIEN</b>                                                                                                   |                                                                                                                                                                                 |                                                                                       |                                               |               |                                                                                    |
| <b>K 1</b>                                                                                                                 |                                                                                                                                                                                 |                                                                                       |                                               |               |                                                                                    |
| <b>Bedienbarkeit</b>                                                                                                       |                                                                                                                                                                                 |                                                                                       |                                               |               |                                                                                    |
| <i>Benennung</i>                                                                                                           | <i>Beschreibung</i>                                                                                                                                                             | <i>Bewertung</i>                                                                      | <i>Bezug</i>                                  | <i>Quelle</i> | <i>Reduktion</i>                                                                   |
| vom Interviewer thematisiert, vom Befragten konkretisiert                                                                  | Eclipse Look & Feel, Strukturiertheit, verschiedene Navigationsmöglichkeiten                                                                                                    | gut, aber keine TG-Spezialität                                                        |                                               | \I10-3\       | K 1.1e<br>anfangs steile Lernkurve, Einarbeitung notwendig, danach gut (z.B. bzgl. |

# I10 Extraktion

|                              |                                                                                  |                                                                            |                          |         |                                                                                                                                                              |
|------------------------------|----------------------------------------------------------------------------------|----------------------------------------------------------------------------|--------------------------|---------|--------------------------------------------------------------------------------------------------------------------------------------------------------------|
|                              |                                                                                  |                                                                            |                          |         | unterschiedlicher Navigations- und Bedienungsmöglichkeiten für dasselbe Ziel, menulastig)<br><br><b>Benutzerführung / Erlernbarkeit</b>                      |
| selbst thematisiert          | Fehlerrückmeldung                                                                | nicht benutzerverständlich, verunsichernd                                  |                          | \I10-3\ | K 1.1c<br>Fehlerrückmeldung / Fehlerkorrektur problematisch, keine Rücksetzfunktion<br><br><b>Benutzerführung / Erlernbarkeit</b>                            |
| vom Interviewer thematisiert | Wörterbuchnetz-Ansicht im Lab                                                    | eher mittelprächtig, im Browser besser                                     |                          | \I10-4\ | K 1.2b<br>Lesbarkeit/Sichtbarkeit am Bildschirm je nach Konfiguration nicht immer gut<br><br><b>Orientierung / Übersichtlichkeit / Oberflächengestaltung</b> |
| vom Interviewer thematisiert | Erlernbarkeit, Stoßrichtung Werkzeug für technisch unbedarfte Editionsphilologen | für Eclipse-Nutzer gut, für Nicht-Eclipse-Nutzer schwierig, zu kompliziert | Produktion/Manipulation, | \I10-5\ | K 1.1.a<br>zu schwierig / technisch für fachwissenschaftliche Nutzer, steile Lernkurve für herkömmlich Edierende und<br>K 1.1d                               |

## I10 Extraktion

|                              |                                                                                                            |                                                              |                                               |          |                                                                                                                                                                                                                                                                      |
|------------------------------|------------------------------------------------------------------------------------------------------------|--------------------------------------------------------------|-----------------------------------------------|----------|----------------------------------------------------------------------------------------------------------------------------------------------------------------------------------------------------------------------------------------------------------------------|
|                              |                                                                                                            |                                                              |                                               |          | mit mehr EDV-Erfahrung<br>(z.B. mit Eclipse) schnell<br>erlernbar und gut bedienbar<br><br><b>Benutzerführung /<br/>Erlernbarkeit</b>                                                                                                                                |
| vom Interviewer thematisiert | Umgang mit Eclipse-<br>Basisfunktionen in TG-<br>Workshops, Vermittlung<br>von TG-<br>Zusatzfunktionalität | Wäre für weniger<br>technisch versierte<br>Klientel sinnvoll |                                               | \I10-5\  | K 1.1g<br>Schulungen für technisch<br>weniger versierte Nutzer,<br>Schritt-für-Schritt-<br>Anleitung,<br>Heranführen/Einbinden der<br>Community, didaktischer<br>Prozess, Mehrwerte<br>vermitteln, Testprojekte<br><br><b>Benutzerführung /<br/>Erlernbarkeit</b>    |
| selbst thematisiert          | Fehlerrückmeldung,<br>Beseitigung grundlegender<br>Fehler                                                  | höchste Priorität,<br>vorher keine neuen<br>Tools            | Produktion/Manipulation,<br>Rezeption/Zugriff | \I10-10\ | K 1.1c<br>Fehlerrückmeldung /<br>Fehlerkorrektur<br>problematisch, keine<br>Rücksetzfunktion<br><br><b>Benutzerführung /<br/>Erlernbarkeit</b><br><br>K 1.3b<br>zu instabil, zu viele<br>Programmierfehler, noch<br>nicht einsetzbar<br><br><b>Systemstabilität,</b> |

# I10 Extraktion

|                                                           |                                                                                                                                                                                                                    |                                                                       |                           |               |                                                                                                                                                                                                            |
|-----------------------------------------------------------|--------------------------------------------------------------------------------------------------------------------------------------------------------------------------------------------------------------------|-----------------------------------------------------------------------|---------------------------|---------------|------------------------------------------------------------------------------------------------------------------------------------------------------------------------------------------------------------|
|                                                           |                                                                                                                                                                                                                    |                                                                       |                           |               | <b>Programmierfehler</b>                                                                                                                                                                                   |
| selbst thematisiert                                       | TG-Bedienbarkeit im Vergleich zu TUSTEP                                                                                                                                                                            | besser                                                                | Produktion/Manipulation   | \I10-17\      | K 1.1i<br>unproblematisch,<br>Übungssache<br><br><b>Benutzerführung /<br/>Erlernbarkeit</b>                                                                                                                |
| <b>K 2<br/>Rezeption/Zugriff</b>                          |                                                                                                                                                                                                                    |                                                                       |                           |               |                                                                                                                                                                                                            |
| <i>Benennung</i>                                          | <i>Beschreibung</i>                                                                                                                                                                                                | <i>Bewertung</i>                                                      | <i>Bezug</i>              | <i>Quelle</i> | <i>Reduktion</i>                                                                                                                                                                                           |
| vom Interviewer thematisiert, vom Befragten konkretisiert | zentrale Clearing-Stelle, Institution, die ordnet und organisiert, damit Werkzeuge und Datenbestände verschlagwortet und auffindbar sind, wie in einer wohlgeordneten Bibliothek, Ontologie mit vorgebahnten Wegen | Wunsch                                                                | Organisation/Verwaltung   | \I10-13\      | K 2.2b<br>Leichte Zugänglichkeit, Übersicht durch Browser, Suchmasken, Ontologien, Klassifizierungen, Indizierungen, Strukturierungen<br><br><b>Zugriffsformen, Rezeptions- und Recherchemöglichkeiten</b> |
| <b>K 3<br/>Produktion/Manipulation</b>                    |                                                                                                                                                                                                                    |                                                                       |                           |               |                                                                                                                                                                                                            |
| <i>Benennung</i>                                          | <i>Beschreibung</i>                                                                                                                                                                                                | <i>Bewertung</i>                                                      | <i>Bezug</i>              | <i>Quelle</i> | <i>Reduktion</i>                                                                                                                                                                                           |
| selbst thematisiert                                       | XML-Editor, Werkzeug-Angebot                                                                                                                                                                                       | zu wenig Funktionalität, zu wenig Hilfestellung durch Werkzeugangebot | Kollaboration/Kooperation | \I10-2\       | K 3.1a<br>eigener XML-Editor ist nicht die Stärke von TextGrid, andere sind besser, nicht der richtige Schwerpunkt<br><br><b>XML-Produktion</b>                                                            |

## I10 Extraktion

|                     |                                                                                |                                            |  |         |                                                                                                                                                                                                                                                    |
|---------------------|--------------------------------------------------------------------------------|--------------------------------------------|--|---------|----------------------------------------------------------------------------------------------------------------------------------------------------------------------------------------------------------------------------------------------------|
|                     |                                                                                |                                            |  |         |                                                                                                                                                                                                                                                    |
| selbst thematisiert | Engine für XSLT-Transformationen, Umformungen für Register, Apparat rausziehen | negativ im TG-Test, nicht verfügbar        |  | \I10-7\ | <p>K 3.3a<br/>Verknüpfungsmöglichkeiten Text-Text (z.B. editionswiss. Kommentarfunktionen, Varianten verknüpfen, Apparat, Quellen/Referenzen, Register, Wörterbücher, Briefe)</p> <p><b>Verknüpfungsmöglichkeiten und deren Visualisierung</b></p> |
| selbst thematisiert | angekündigte TG-Tools wie Kollationierer, Registerprogramm, Tokenizer          | vielversprechend, interessant              |  | \I10-9\ | <p>K 3.4a<br/>Arbeitsumgebung mit Tool-Angebot, nicht alles neu /selbst programmieren, kostenlos</p> <p><b>Produktionsunterstützung allgemein</b></p>                                                                                              |
| selbst thematisiert | historische Lemmatisierung in Verbindung mit Wörterbüchern                     | interessant, funktioniert noch nicht in TG |  | \I10-9\ | <p>K 3.2a<br/>Verknüpfung von Tools, kreative Ansätze (z.B. Wörterbücher zur Kollationierung nutzen, Lemmatisierung mit Wörterbüchern verbinden), interdisziplinäre Ansätze</p> <p><b>Analyse- und</b></p>                                         |

## I10 Extraktion

|                                                           |                                                                                                                                                |                                                              |                   |          | <b>Visualisierungsmöglichkeiten</b>                                                                                                                                                                                                        |
|-----------------------------------------------------------|------------------------------------------------------------------------------------------------------------------------------------------------|--------------------------------------------------------------|-------------------|----------|--------------------------------------------------------------------------------------------------------------------------------------------------------------------------------------------------------------------------------------------|
| selbst thematisiert                                       | Werkzeuge für Register, Apparat, Kommentierung über XSLT-Engine                                                                                | zentral für die Arbeit des/der Befragten, fehlen in TextGrid |                   | \I10-9\  | K 3.3a<br>Verknüpfungsmöglichkeiten Text-Text (z.B. editionswiss. Kommentarfunktionen, Varianten verknüpfen, Apparat, Quellen/Referenzen, Register, Wörterbücher, Briefe)<br><br><b>Verknüpfungsmöglichkeiten und deren Visualisierung</b> |
| vom Interviewer thematisiert                              | Visualisierung von Verweisungen, von semantischen Netzen                                                                                       | interessant, aber nicht höchste Priorität                    | Rezeption/Zugriff | \I10-15\ | K 3.3b<br>Visualisierung von Beziehungen (z. B. in Briefnetzen), Mustererkennung<br><br><b>Verknüpfungsmöglichkeiten und deren Visualisierung</b>                                                                                          |
| vom Interviewer thematisiert, vom Befragten konkretisiert | Grund der Verknüpfung von Daten transparent machen, semantische Relationen von Verweisen, Spezifikation der Art von Verweisen, z.B. Verweis in | interessant                                                  | RezeptionZugriff  | \I10-15\ | K 3.3a<br>Verknüpfungsmöglichkeiten Text-Text (z.B. editionswiss. Kommentarfunktionen, Varianten verknüpfen, Apparat,                                                                                                                      |

# I10 Extraktion

|                                                           |                                                                                                                                                                        |                                                |                   |               |                                                                                                                                                                                                                                            |
|-----------------------------------------------------------|------------------------------------------------------------------------------------------------------------------------------------------------------------------------|------------------------------------------------|-------------------|---------------|--------------------------------------------------------------------------------------------------------------------------------------------------------------------------------------------------------------------------------------------|
|                                                           | Dialektwörterbüchern vs. Verweis auf Oberbegriffe                                                                                                                      |                                                |                   |               | Quellen/Referenzen, Register, Wörterbücher, Briefe)<br><br><b>Verknüpfungsmöglichkeiten und deren Visualisierung</b>                                                                                                                       |
| vom Interviewer thematisiert, vom Befragten konkretisiert | Herstellung von Verknüpfungen zwischen Editionen und Wörterbüchern, aber nur an problematischen Stellen, an denen Apparat notwendig ist, sonst wird es unübersichtlich | tolle Sache, großer Gewinn                     | Rezeption/Zugriff | \I10-16\      | K 3.3a<br>Verknüpfungsmöglichkeiten Text-Text (z.B. editionswiss. Kommentarfunktionen, Varianten verknüpfen, Apparat, Quellen/Referenzen, Register, Wörterbücher, Briefe)<br><br><b>Verknüpfungsmöglichkeiten und deren Visualisierung</b> |
| selbst thematisiert                                       | Funktionalität von TUSTEP in TextGrid                                                                                                                                  | Wunsch, aber in TextGrid nicht umgesetzt       |                   | \I10-17\      | K 3.4d<br>TUSTEP-Funktionalität<br><br><b>Produktionsunterstützung allgemein</b>                                                                                                                                                           |
| <b>K 4</b><br><b>Modularität/Anpassbarkeit</b>            |                                                                                                                                                                        |                                                |                   |               |                                                                                                                                                                                                                                            |
| <i>Benennung</i>                                          | <i>Beschreibung</i>                                                                                                                                                    | <i>Bewertung</i>                               | <i>Bezug</i>      | <i>Quelle</i> | <i>Reduktion</i>                                                                                                                                                                                                                           |
| selbst thematisiert                                       | TextGrid-Metadaten, eigene Metadaten einbringen                                                                                                                        | unpraktisch gelöst, Automatisieren wäre besser |                   | \I10-3\       | K 4.3c<br>Schemata und Metadaten- bzw. Auszeichnungs-                                                                                                                                                                                      |

## I10 Extraktion

|                                  |                                                                                                                                                                                                                                              |                                                                         |                         |               |                                                                                                                                                      |
|----------------------------------|----------------------------------------------------------------------------------------------------------------------------------------------------------------------------------------------------------------------------------------------|-------------------------------------------------------------------------|-------------------------|---------------|------------------------------------------------------------------------------------------------------------------------------------------------------|
|                                  |                                                                                                                                                                                                                                              |                                                                         |                         |               | Konzepte anpassen/nachnutzen und eigene einbinden<br><b>Inhalte</b>                                                                                  |
| selbst thematisiert              | Lieblings-XML-Editor Oxygen integrieren, Schnittstellen                                                                                                                                                                                      | Wunsch                                                                  | Produktion/Manipulation | \I10-11\      | K 4.2a<br>Anschließbarkeit und Kombinierbarkeit von Tools und Services, auch von selbstentwickelten – modulares Konzept<br><b>Tools und Services</b> |
| selbst thematisiert              | Werkzeuge müssen an Daten anpassbar sein, parametrierbar, an die eigene Arbeit anpassbar, Konfigurierbarkeit auf individuelle Bedürfnisse, z.B. hat jedes Wörterbuch seine eigenen Stärken, die durch Werkzeuge berücksichtigt werden müssen | Wunsch, wichtig, sonst lieber selberbauen, damit sie 100% funktionieren | Produktion/Manipulation | \I10-14\      | K 4.2b<br>Anpassbarkeit von Tools an das jeweilige Projekt / die jeweiligen Gegenstände<br><b>Tools und Services</b>                                 |
| <b>K 5</b>                       |                                                                                                                                                                                                                                              |                                                                         |                         |               |                                                                                                                                                      |
| <b>Kollaboration/Kooperation</b> |                                                                                                                                                                                                                                              |                                                                         |                         |               |                                                                                                                                                      |
| <i>Benennung</i>                 | <i>Beschreibung</i>                                                                                                                                                                                                                          | <i>Bewertung</i>                                                        | <i>Bezug</i>            | <i>Quelle</i> | <i>Reduktion</i>                                                                                                                                     |
| selbst thematisiert              | kollaboratives Arbeiten, zusammen am gleichen Material von verschiedenen Orten/Ländern aus,                                                                                                                                                  | besonders überzeugend                                                   | Produktion/Manipulation | \I10-2\       | K 5.2a<br>Zusammenarbeit in Teams von verschiedenen Orten aus, auch an einem Dokument, verteilte Bearbeitung verschiedener                           |



# I10 Extraktion

|                                        |                                                                                                                                              |                          |                                        |               |                                                                                                                                                                                          |
|----------------------------------------|----------------------------------------------------------------------------------------------------------------------------------------------|--------------------------|----------------------------------------|---------------|------------------------------------------------------------------------------------------------------------------------------------------------------------------------------------------|
|                                        |                                                                                                                                              |                          |                                        |               | ‚Schichten‘ eines Dokuments usw.<br><br><b>Zusammenarbeit</b>                                                                                                                            |
| selbst thematisiert                    | Pool, in den Geisteswissenschaftler in Europa hineinarbeiten, der Schnittstellen bietet für den Austausch von Daten auch zwischen Werkzeugen | Wunsch, Chance durch DH  | Modularität/Anpassbarkeit              | \I10-12\      | K 5.1a<br>Austausch von Ressourcen, Nachnutzung und<br>K 5.1c<br>Austausch von Arbeitsmitteln (Tools, Formaten, Skripten usw.)<br><br><b>Austausch von Inhalten und Werkzeugen</b>       |
| selbst thematisiert                    | Möglichkeiten des kollaborativen Arbeitens in TG auch im Vergleich mit TUSTEP                                                                | größter Vorteil von TG   | Produktion/Manipulation, Bedienbarkeit | \I10-17\      | K 5.2a<br>Zusammenarbeit in Teams von verschiedenen Orten aus, auch an einem Dokument, verteilte Bearbeitung verschiedener ‚Schichten‘ eines Dokuments usw.<br><br><b>Zusammenarbeit</b> |
| <b>K 6<br/>Organisation/Verwaltung</b> |                                                                                                                                              |                          |                                        |               |                                                                                                                                                                                          |
| <i>Benennung</i>                       | <i>Beschreibung</i>                                                                                                                          | <i>Bewertung</i>         | <i>Bezug</i>                           | <i>Quelle</i> | <i>Reduktion</i>                                                                                                                                                                         |
| selbst thematisiert                    | Unsicherheit bei Speichervorgängen, mal hat es funktioniert, mal nicht, Einlesen eigener                                                     | schwierig, verunsichernd |                                        | \I10-6\       | K 6.1b<br>Datenspeicherung und -verwaltung, Langzeitarchivierung,                                                                                                                        |

# I10 Extraktion

|                                                           |                                                                                                                                                                               |                                                                 |                           |         |                                                                                                                    |
|-----------------------------------------------------------|-------------------------------------------------------------------------------------------------------------------------------------------------------------------------------|-----------------------------------------------------------------|---------------------------|---------|--------------------------------------------------------------------------------------------------------------------|
|                                                           | Daten ging - Speichern nicht                                                                                                                                                  |                                                                 |                           |         | verbunden mit Bearbeitungs-möglichkeiten und Nachnutzung<br><br><b>Organisation und Verwaltung von Inhalten</b>    |
| vom Interviewer thematisiert, vom Befragten konkretisiert | Versionenverwaltung, verwendet in Projekten, in TG nicht ausprobiert, nimmt an, dass TG es anbietet, Zuweisung von Zugriffsrechten auf Dateien hat nicht richtig funktioniert | Wünschenswert, in TG negativ, weil noch nicht richtig umgesetzt | Kollaboration/Kooperation | \I10-8\ | K 6.2a<br>Workflow-Organisation, Projekt-Verwaltung<br><br><b>Organisation und Verwaltung von Arbeitsprozessen</b> |
