# Supplementary material
Source: publisher site journal article supplement (https://www.degruyterbrill.com/publication/isbn/9783110463927/downloadAsset/9783110463927_Extraktionen_Reduktionen_fallbezogen.zip)
Supplement: Supplementary file 3 [file I11 Extraktion und Reduktion.pdf › fallbezogene Extraktionen und Reduktionen/I11 Extraktion und Reduktion.pdf]

# I11 Extraktion

| <b>TÄTIGKEITEN UND EDV-ERFAHRUNG</b>                                                                                              |                                                                                                                                                                             |                                                                                                                          |                                 |               |                                                                                                                            |
|-----------------------------------------------------------------------------------------------------------------------------------|-----------------------------------------------------------------------------------------------------------------------------------------------------------------------------|--------------------------------------------------------------------------------------------------------------------------|---------------------------------|---------------|----------------------------------------------------------------------------------------------------------------------------|
| <b>Tätigkeiten</b>                                                                                                                |                                                                                                                                                                             |                                                                                                                          |                                 |               |                                                                                                                            |
| <i>Gegenstände</i>                                                                                                                | <i>Methoden/Verfahren</i>                                                                                                                                                   | <i>Ziele/Fragen</i>                                                                                                      | <i>Institutioneller Rahmen</i>  | <i>Quelle</i> |                                                                                                                            |
| EDV-Beratung mit den Schwerpunkten: Text als Objekt<br>geisteswissenschaftlichen Arbeitens, Sprache, Geschichte, Sprachgeschichte | digitale Texterschließung und -verwaltung, Datenbanken, quantifizierende Textanalyse, Vergleich von Textzeugen bzw. -ausgaben, Textgenese nachvollziehen, kritische Edition | Text digital verfügbar machen, verwalten, speichern, Textanalyse, Textgenese nachvollziehen, kritische Edition erstellen | Rechenzentrum einer Universität | \I11-1\       |                                                                                                                            |
| <b>Erfahrung</b>                                                                                                                  |                                                                                                                                                                             |                                                                                                                          |                                 |               |                                                                                                                            |
|                                                                                                                                   | <i>Beschreibung</i>                                                                                                                                                         | <i>Bewertung</i>                                                                                                         |                                 | <i>Quelle</i> |                                                                                                                            |
|                                                                                                                                   | digitale Texterschließung bzw. -analyse, TUSTEP, Datenbanken                                                                                                                | viel Erfahrung, hohe Kompetenz im Bereich EDV in den Geisteswissenschaften                                               |                                 | \I11-1\       |                                                                                                                            |
|                                                                                                                                   | Erfahrung mit Eclipse nur mittelbar, XML-Editoren-Erfahrung                                                                                                                 | Eclipse gering, XML-Editor hoch, kann kritisch vergleichen                                                               |                                 | \I11-4\       |                                                                                                                            |
| <b>BEDARFSKATEGORIEN</b>                                                                                                          |                                                                                                                                                                             |                                                                                                                          |                                 |               |                                                                                                                            |
| <b>K 1 Bedienbarkeit</b>                                                                                                          |                                                                                                                                                                             |                                                                                                                          |                                 |               |                                                                                                                            |
| <i>Benennung</i>                                                                                                                  | <i>Beschreibung</i>                                                                                                                                                         | <i>Bewertung</i>                                                                                                         | <i>Bezug</i>                    | <i>Quelle</i> | <i>Reduktion</i>                                                                                                           |
| selbst thematisiert                                                                                                               | zahlreiche Unfertigkeiten, nur das, was präpariert war, hat funktioniert                                                                                                    | "gemischt", nur ein erstes Hereinschnuppern                                                                              |                                 | \I11-2\       | K 1.3b<br>zu instabil, zu viele Programmierfehler, noch nicht einsetzbar<br><br><b>Systemstabilität, Programmierfehler</b> |

## I11 Extraktion

|                     |                                                                                                                                                                            |                        |                                            |         |                                                                                                                                                                                                                                                     |
|---------------------|----------------------------------------------------------------------------------------------------------------------------------------------------------------------------|------------------------|--------------------------------------------|---------|-----------------------------------------------------------------------------------------------------------------------------------------------------------------------------------------------------------------------------------------------------|
| selbst thematisiert | Vielfalt von Kinderkrankheiten, nur nach Anleitung Funktionalität, Bsp. Wort markieren und taggen --> Tag nicht drumherum, sondern davor                                   | zu viel Fehlfunktionen | Produktion/Manipulation                    | \I11-3\ | K 1.3b<br>zu unstabil, zu viele Programmierfehler, noch nicht einsetzbar<br><br><b>Systemstabilität, Programmierfehler</b>                                                                                                                          |
| selbst thematisiert | anspruchsvolle, durchdachte Oberfläche, am Anfang Hilfe notwendig, wenn man sich auf die Philosophie einlässt, kommt man zurecht                                           | gelungen               |                                            | \I11-4\ | K 1.1e<br>anfangs steile Lernkurve, Einarbeitung notwendig, danach gut (z.B. bzgl. unterschiedlicher Navigations- und Bedienungsmöglichkeiten für dasselbe Ziel, menulastig)<br><br><b>Benutzerführung / Erlernbarkeit</b>                          |
| selbst thematisiert | Arbeitsaufwand für anspruchsvolle EDV-unterstützte Tätigkeiten, Textkodierung erforderlich, Informationen reinstecken, um mehr herauszubekommen, Gehirnschmalz investieren | Hürde, problematisch   | Produktion/Manipulation, Rezeption/Zugriff | \I11-8\ | K 1.1f<br>bereit, in das Erlernen von Programmen zu investieren, die viel können, in anspruchsvolle Ergebnisse<br><br><b>Benutzerführung / Erlernbarkeit</b><br><br>K 1.4a<br>XML/TEI ist eine Hürde, Unterstützung durch das System ist notwendig, |

## I11 Extraktion

|                     |                                                                                                                                                                               |               |                                            |         |                                                                                                                                                                                                                                                                                              |
|---------------------|-------------------------------------------------------------------------------------------------------------------------------------------------------------------------------|---------------|--------------------------------------------|---------|----------------------------------------------------------------------------------------------------------------------------------------------------------------------------------------------------------------------------------------------------------------------------------------------|
|                     |                                                                                                                                                                               |               |                                            |         | <p>Heranführen/Hilfemenu, Reduzierung der Schwelle, aber keine Vermeidung von spitzen Klammern, Komplexität abbilden, fachliche Mehrwerte vermitteln</p> <p><b>Bedienbarkeit der Auszeichnungsebene</b></p>                                                                                  |
| selbst thematisiert | naive Vorstellungen, mit EDV geht einfach alles auf Knopfdruck, Notwendigkeit und Mehrwert der Vorbearbeitung wird nicht erkannt                                              | problematisch | Produktion/Manipulation, Rezeption/Zugriff | \I11-9\ | <p>K 1.4a<br/>XML/TEI ist eine Hürde, Unterstützung durch das System ist notwendig, Heranführen/Hilfemenu, Reduzierung der Schwelle, aber keine Vermeidung von spitzen Klammern, Komplexität abbilden, fachliche Mehrwerte vermitteln</p> <p><b>Bedienbarkeit der Auszeichnungsebene</b></p> |
| selbst thematisiert | Kodierung als Einstiegshürde zu senken ist keine Lösung, sie ist das Entscheidende, viele verweigern sich aber dem Kodieren, sagen, sie könnten dann nicht mehr sehen, was es | problematisch | Produktion/Manipulation                    | \I11-9\ | <p>K 1.4a<br/>XML/TEI ist eine Hürde, Unterstützung durch das System ist notwendig, Heranführen/Hilfemenu, Reduzierung der Schwelle, aber keine Vermeidung von spitzen Klammern, Komplexität</p>                                                                                             |

# I11 Extraktion

|                                  |                                                                                                                                                             |                                              |                           |               |                                                                                                                                                                                                                                                                       |
|----------------------------------|-------------------------------------------------------------------------------------------------------------------------------------------------------------|----------------------------------------------|---------------------------|---------------|-----------------------------------------------------------------------------------------------------------------------------------------------------------------------------------------------------------------------------------------------------------------------|
|                                  | eigentlich ist                                                                                                                                              |                                              |                           |               | abbilden, fachliche Mehrwerte vermitteln<br><br><b>Bedienbarkeit der Auszeichnungsebene</b>                                                                                                                                                                           |
| <b>K 2<br/>Rezeption/Zugriff</b> |                                                                                                                                                             |                                              |                           |               |                                                                                                                                                                                                                                                                       |
| <i>Benennung</i>                 | <i>Beschreibung</i>                                                                                                                                         | <i>Bewertung</i>                             | <i>Bezug</i>              | <i>Quelle</i> | <i>Reduktion</i>                                                                                                                                                                                                                                                      |
| vom Interviewer thematisiert     | Wenn im Hinblick auf Recherche etwas Arbeit abgenommen wird, könnte es etwas bewirken, aber wenn es spezifischer wird, ist es problematisch                 | Verbesserungsmöglichkeit, aber problematisch |                           | \I11-10\      | K 2.2b<br>Leichte Zugänglichkeit, Übersicht durch Browser, Suchmasken, Ontologien, Klassifizierungen, Indizierungen, Strukturierungen<br><br><b>Zugriffsformen, Rezeptions- und Recherchemöglichkeiten</b>                                                            |
| selbst thematisiert              | Zugriff auf "verlässliche" Texte, allgemein und zu Analyse Zwecken, Projekt Gutenberg hat viel geleistet, Datengrundlage und methodologischen Pool schaffen | gigantischer Bedarf                          | Kollaboration/Kooperation | \I11-11\      | K 2.1a<br>kostenloser Zugriff auf unterschiedliche Repositorien bzw. Ressourcen (z.B. Wörterbücher), Quellen und Ausgaben/ Editionen, Vergleichsmöglichkeiten mit anderen Projekten/ Quellen, orts- und rechnerunabhängiger Zugriff<br><br><b>Zugriff auf Inhalte</b> |

## I11 Extraktion

|                                                           |                                                                                                                                                                                                                                                                                                                                                                                     |                                                |                         |          |                                                                                                                                                                                                                                                                                                                                                                       |
|-----------------------------------------------------------|-------------------------------------------------------------------------------------------------------------------------------------------------------------------------------------------------------------------------------------------------------------------------------------------------------------------------------------------------------------------------------------|------------------------------------------------|-------------------------|----------|-----------------------------------------------------------------------------------------------------------------------------------------------------------------------------------------------------------------------------------------------------------------------------------------------------------------------------------------------------------------------|
| selbst thematisiert                                       | Zugriff auf gute Ausgaben, Gutenberg ist zwar ein riesiges Reservoir, aber aus editorisch-wissenschaftlicher Sicht größtenteils unbrauchbar, möglichst breite Basis/Pool editorisch verlässlicher Texte, Varianten und Kommentare ausgezeichnet, textkritischer Apparat, Quelle und Qualitätskriterien transparent machen, periphere Informationen, Einfluss auf Recherchierbarkeit | Situation mehr als enttäuschend, großer Bedarf |                         | \I11-12\ | K 2.1a<br>kostenloser Zugriff auf unterschiedliche Repositorien bzw. Ressourcen (z.B. Wörterbücher), Quellen und Ausgaben/ Editionen, Vergleichsmöglichkeiten mit anderen Projekten/ Quellen, orts- und rechnerunabhängiger Zugriff und<br>K 2.1b<br>Kostenloser Zugriff auf maschinell verarbeitete Daten und Forschungsergebnisse<br><br><b>Zugriff auf Inhalte</b> |
| vom Interviewer thematisiert, vom Befragten konkretisiert | Systematik anlegen, wächst mit dem Verhältnis zu den und entlang der Daten, zunächst grobe literaturhistorische Systematik, außerdem nach Sprachen bzw. Sprachräumen geordnet,                                                                                                                                                                                                      | unbedingt, selbstverständlich                  | Organisation/Verwaltung | \I11-13\ | K 2.2b<br>Leichte Zugänglichkeit, Übersicht durch Browser, Suchmasken, Ontologien, Klassifizierungen, Indizierungen, Strukturierungen<br><br><b>Zugriffsformen, Rezeptions- und Recherchemöglichkeiten</b>                                                                                                                                                            |
| vom Interviewer                                           | Systematik mit drei bis                                                                                                                                                                                                                                                                                                                                                             | fundamental                                    |                         | \I11-14\ | K 2.2b                                                                                                                                                                                                                                                                                                                                                                |

## I11 Extraktion

|                                                           |                                                                                                                                                      |                                                                           |  |          |                                                                                                                                                                                                                                   |
|-----------------------------------------------------------|------------------------------------------------------------------------------------------------------------------------------------------------------|---------------------------------------------------------------------------|--|----------|-----------------------------------------------------------------------------------------------------------------------------------------------------------------------------------------------------------------------------------|
| thematisiert, vom Befragten konkretisiert                 | fünf Hierarchiestufen, nachvollziehbar und nicht zu feingliedrig, kann man später noch machen                                                        |                                                                           |  |          | Leichte Zugänglichkeit, Übersicht durch Browser, Suchmasken, Ontologien, Klassifizierungen, Indizierungen, Strukturierungen<br><br><b>Zugriffsformen, Rezeptions- und Recherchemöglichkeiten</b>                                  |
| vom Interviewer thematisiert, vom Befragten konkretisiert | keine Eingriffsmöglichkeit in die Systematik für Nutzer, nur Vorschläge dürfen erlaubt werden, administrative Ebene                                  | Wäre sonst ein schwerer Fehler                                            |  | \I11-15\ | K 2.2b<br>Leichte Zugänglichkeit, Übersicht durch Browser, Suchmasken, Ontologien, Klassifizierungen, Indizierungen, Strukturierungen<br><br><b>Zugriffsformen, Rezeptions- und Recherchemöglichkeiten</b>                        |
| selbst thematisiert                                       | Feingliedrigkeit des Zugriffs unter fachspezifischen Gesichtspunkten, allen Aspekten wissenschaftlichen Zugriffs auf einer Oberfläche gerecht werden | Vermisst, Umsetzung schwierig, andererseits Herausforderung und Potenzial |  | \I11-17\ | K 2.2a<br>Spezifizierbarkeit des Zugriffs, fachspezifische Zugriffsmöglichkeiten, verschiedene Zugriffsperspektiven durch Auszeichnungen und Präsentationsformen (z.B. parallele Ansicht von Faksimile und Transkription im TBLE) |

|                                          |                                                                                                                                                                                                                                                                                                                                                                                                       |                                                                                                                   |              |               |                                                                                                                                                                                                                                                  |
|------------------------------------------|-------------------------------------------------------------------------------------------------------------------------------------------------------------------------------------------------------------------------------------------------------------------------------------------------------------------------------------------------------------------------------------------------------|-------------------------------------------------------------------------------------------------------------------|--------------|---------------|--------------------------------------------------------------------------------------------------------------------------------------------------------------------------------------------------------------------------------------------------|
|                                          |                                                                                                                                                                                                                                                                                                                                                                                                       |                                                                                                                   |              |               | <b>Zugriffsformen,<br/>Rezeptions- und<br/>Recherchemöglichkeiten</b>                                                                                                                                                                            |
| <b>K 3<br/>Produktion/Manipulation</b>   |                                                                                                                                                                                                                                                                                                                                                                                                       |                                                                                                                   |              |               |                                                                                                                                                                                                                                                  |
| <i>Benennung</i>                         | <i>Beschreibung</i>                                                                                                                                                                                                                                                                                                                                                                                   | <i>Bewertung</i>                                                                                                  | <i>Bezug</i> | <i>Quelle</i> | <i>Reduktion</i>                                                                                                                                                                                                                                 |
| ---                                      | ---                                                                                                                                                                                                                                                                                                                                                                                                   | ---                                                                                                               | ---          | ---           | ---                                                                                                                                                                                                                                              |
| <b>K 4<br/>Modularität/Anpassbarkeit</b> |                                                                                                                                                                                                                                                                                                                                                                                                       |                                                                                                                   |              |               |                                                                                                                                                                                                                                                  |
| <i>Benennung</i>                         | <i>Beschreibung</i>                                                                                                                                                                                                                                                                                                                                                                                   | <i>Bewertung</i>                                                                                                  | <i>Bezug</i> | <i>Quelle</i> | <i>Reduktion</i>                                                                                                                                                                                                                                 |
| vom Interviewer thematisiert             | je mehr Möglichkeiten,<br>je mehr Wege nach Rom<br>führen, desto besser,<br>möglichst wenig<br>gängeln, Bsp. künftiges<br>Indexierungsprogramm:<br>viele Optionen,<br>Sortierung genau auf Art<br>und Weise wählbar, die<br>man braucht, keine<br>eierlegende<br>Wollmilchsau,<br>zahlreiche<br>projektspezifische<br>Erfordernisse vorsehen;<br>keine fertig gestrickten,<br>automatisierten Abläufe | fundamental, ganz<br>wesentlich, EDV-<br>Erfahrene kommen damit<br>innerhalb von einem Tag<br>klar                |              | \I11-5\       | K 4.1a<br>Anpassung der<br>Oberflächenkonfiguration<br><br><b>TextGrid-Oberfläche /<br/>Umgebung</b><br>und<br>K 4.2b<br>Anpassbarkeit von Tools<br>an das jeweilige Projekt /<br>die jeweiligen<br>Gegenstände<br><br><b>Tools und Services</b> |
| <b>K 5<br/>Kollaboration/Kooperation</b> |                                                                                                                                                                                                                                                                                                                                                                                                       |                                                                                                                   |              |               |                                                                                                                                                                                                                                                  |
| <i>Benennung</i>                         | <i>Beschreibung</i>                                                                                                                                                                                                                                                                                                                                                                                   | <i>Bewertung</i>                                                                                                  | <i>Bezug</i> | <i>Quelle</i> | <i>Reduktion</i>                                                                                                                                                                                                                                 |
| selbst thematisiert                      | Nutzung der digitalen<br>Möglichkeiten, bislang<br>nur 5 % ausgeschöpft,<br>vergebliche                                                                                                                                                                                                                                                                                                               | sieht riesiges Potenzial an<br>neuen Möglichkeiten für<br>die Geisteswissenschaften,<br>nicht die Veränderung der |              | \I11-6\       | K 5.3a<br>Partizipation/Nutzung als<br>Voraussetzung<br>und                                                                                                                                                                                      |

# I11 Extraktion

|                     |                                                                                                                                                                                                                                             |                                                                                              |                   |          |                                                                                                                                                                                      |
|---------------------|---------------------------------------------------------------------------------------------------------------------------------------------------------------------------------------------------------------------------------------------|----------------------------------------------------------------------------------------------|-------------------|----------|--------------------------------------------------------------------------------------------------------------------------------------------------------------------------------------|
|                     | Vermittlungsversuche                                                                                                                                                                                                                        | Methodologie, sondern neue zusätzliche Möglichkeiten, skeptisch wegen ausgebliebener Nutzung |                   |          | K 5.3b<br>Community-Building erforderlich, Umdenken erforderlich, durch Überzeugungsarbeit, Veranstaltungen und Erfahrungsaustausch anregen<br><br><b>Community-Building-Aspekte</b> |
| selbst thematisiert | von EDV wird kaum Gebrauch gemacht, Mehrwert nicht erkannt, Modularisierung der Studiengänge verhindert die zusätzliche Beschäftigung mit DH, naive Vorstellungen bzgl. EDV-Unterstützung, z.B. immer noch Ausdruck oder Datenbank als Ziel | Schwierigkeit für die DH                                                                     |                   | \I11-7\  | K 5.3a<br>Partizipation/Nutzung als Voraussetzung<br><br><b>Community-Building-Aspekte</b>                                                                                           |
| selbst thematisiert | Community muss zusammenwachsen und eine Datengrundlage und einen methodologischen Pool schaffen                                                                                                                                             | hohe Bedeutung                                                                               | Rezeption/Zugriff | \I11-11\ | K 5.1a<br>Austausch von Ressourcen, Nachnutzung und<br>K 5.1c<br>Austausch von Arbeitsmitteln (Tools, Formaten, Skripten usw.)<br><br><b>Austausch von Inhalten und Werkzeugen</b>   |



# I11 Extraktion

|                                |                     |                  |              |               |                  |
|--------------------------------|---------------------|------------------|--------------|---------------|------------------|
|                                |                     |                  |              |               |                  |
| <b>K 6</b>                     |                     |                  |              |               |                  |
| <b>Organisation/Verwaltung</b> |                     |                  |              |               |                  |
| <i>Benennung</i>               | <i>Beschreibung</i> | <i>Bewertung</i> | <i>Bezug</i> | <i>Quelle</i> | <i>Reduktion</i> |
| ---                            | ---                 | ---              | ---          | ---           | ---              |
