# Supplementary material
Source: publisher site journal article supplement (https://www.degruyterbrill.com/publication/isbn/9783110463927/downloadAsset/9783110463927_Extraktionen_Reduktionen_fallbezogen.zip)
Supplement: Supplementary file 4 [file I12 Extraktion und Reduktion.pdf › fallbezogene Extraktionen und Reduktionen/I12 Extraktion und Reduktion.pdf]

## I12 Extraktion

|                                                           |                                                                                                                        |                                                                   |                                              |               |                                                                                                                                   |
|-----------------------------------------------------------|------------------------------------------------------------------------------------------------------------------------|-------------------------------------------------------------------|----------------------------------------------|---------------|-----------------------------------------------------------------------------------------------------------------------------------|
| <b>TÄTIGKEITEN UND EDV-ERFAHRUNG</b>                      |                                                                                                                        |                                                                   |                                              |               |                                                                                                                                   |
| <b>Tätigkeiten</b>                                        |                                                                                                                        |                                                                   |                                              |               |                                                                                                                                   |
| <i>Gegenstände</i>                                        | <i>Methoden/Verfahren</i>                                                                                              | <i>Ziele/Fragen</i>                                               | <i>Institutioneller Rahmen</i>               | <i>Quelle</i> |                                                                                                                                   |
| EDV-Philologie                                            | Auszeichnung, Markup von Texten, Auszeichnung von Wörterbüchern                                                        | unterschiedliche wissenschaftliche Kriterien für die Auszeichnung | Universität, Forschungszentrum bzw. -projekt | \I12-1\       |                                                                                                                                   |
| <b>Erfahrung</b>                                          |                                                                                                                        |                                                                   |                                              |               |                                                                                                                                   |
|                                                           | <i>Beschreibung</i>                                                                                                    | <i>Bewertung</i>                                                  |                                              | <i>Quelle</i> |                                                                                                                                   |
|                                                           | EDV-philologisch tätig seit über 10 Jahren, TextGrid-Entwicklung in einer der entwickelnden Institutionen mitverfolgt, | große Erfahrung, mehr als 10 Jahre, TextGrid-Erfahrung            |                                              | \I12-1\       |                                                                                                                                   |
|                                                           | TUSTEP-Kenntnisse                                                                                                      | kennt Spezialanwendungen wie Visualisierung von Textvergleichen   |                                              | \I12-4\       |                                                                                                                                   |
|                                                           | TUSTEP                                                                                                                 | große Erfahrung, arbeitet sehr viel damit                         |                                              | \I12-7\       |                                                                                                                                   |
| <b>BEDARFSKATEGORIEN</b>                                  |                                                                                                                        |                                                                   |                                              |               |                                                                                                                                   |
| <b>K 1</b>                                                |                                                                                                                        |                                                                   |                                              |               |                                                                                                                                   |
| <b>Bedienbarkeit</b>                                      |                                                                                                                        |                                                                   |                                              |               |                                                                                                                                   |
| <i>Benennung</i>                                          | <i>Beschreibung</i>                                                                                                    | <i>Bewertung</i>                                                  | <i>Bezug</i>                                 | <i>Quelle</i> | <i>Reduktion</i>                                                                                                                  |
| vom Interviewer thematisiert, vom Befragten konkretisiert | Bedienbarkeit, Rücksetzfunktion in den ursprünglichen Zustand der Oberfläche                                           | gut, Wunsch                                                       | Modularität/Anpassbarkeit                    | \I12-6\       | K 1.1c<br>Fehlerrückmeldung / Fehlerkorrektur problematisch, keine Rücksetzfunktion<br><br><b>Benutzerführung / Erlernbarkeit</b> |
| vom Interviewer thematisiert                              | Benutzerführung auf                                                                                                    | Wunsch, förderlich für                                            | Kollaboration/Kooperation                    | \I12-16\      | K 1.2d                                                                                                                            |

## I12 Extraktion

|                                                           |                                                                                                                                                            |                                                                                                              |                         |               |                                                                                                                                                                                                                                                                                     |
|-----------------------------------------------------------|------------------------------------------------------------------------------------------------------------------------------------------------------------|--------------------------------------------------------------------------------------------------------------|-------------------------|---------------|-------------------------------------------------------------------------------------------------------------------------------------------------------------------------------------------------------------------------------------------------------------------------------------|
|                                                           | Deutsch, vor allem aus Vermarktungsgründen                                                                                                                 | Akzeptanz                                                                                                    |                         |               | Deutschsprachige Oberfläche<br>nützlich/notwendig<br><br><b>Orientierung /<br/>Übersichtlichkeit /<br/>Oberflächengestaltung</b>                                                                                                                                                    |
| vom Interviewer thematisiert, vom Befragten konkretisiert | Bedienung mit Online-Hilfe in Ordnung, Default-Button                                                                                                      | positiv vor dem eigenen Erfahrungshintergrund, Abgrenzung zu unbewanderten Benutzern (schwer hineinzusetzen) | Produktion/Manipulation | \I12-16\      | K 1.1d<br>mit mehr EDV-Erfahrung (z.B. mit Eclipse) schnell erlernbar und gut bedienbar<br><br><b>Benutzerführung /<br/>Erlernbarkeit</b>                                                                                                                                           |
| <b>K 2<br/>Rezeption/Zugriff</b>                          |                                                                                                                                                            |                                                                                                              |                         |               |                                                                                                                                                                                                                                                                                     |
| <i>Benennung</i>                                          | <i>Beschreibung</i>                                                                                                                                        | <i>Bewertung</i>                                                                                             | <i>Bezug</i>            | <i>Quelle</i> | <i>Reduktion</i>                                                                                                                                                                                                                                                                    |
| selbst thematisiert                                       | Auszeichnung nach TEI-Guidelines ermöglicht genaueren und vereinheitlichten Zugriff als z.B. eine Suchmaschine, Quellen und Belege für meine Fragestellung | Wunsch, Vorteil                                                                                              |                         | \I12-10\      | K 2.1a<br>kostenloser Zugriff auf unterschiedliche Repositorien bzw. Ressourcen (z.B. Wörterbücher), Quellen und Ausgaben/ Editionen, Vergleichsmöglichkeiten mit anderen Projekten/ Quellen, orts- und rechnerunabhängiger Zugriff<br><br><b>Zugriff auf Inhalte</b><br><br>K 2.2a |

## I12 Extraktion

|                              |                                                                                                                  |                                          |                           |          |                                                                                                                                                                                                                                                                                                     |
|------------------------------|------------------------------------------------------------------------------------------------------------------|------------------------------------------|---------------------------|----------|-----------------------------------------------------------------------------------------------------------------------------------------------------------------------------------------------------------------------------------------------------------------------------------------------------|
|                              |                                                                                                                  |                                          |                           |          | <p>Spezifizierbarkeit des Zugriffs, fachspezifische Zugriffsmöglichkeiten, verschiedene Zugriffsperspektiven durch Auszeichnungen und Präsentationsformen (z.B. parallele Ansicht von Faksimile und Transkription im TBLE)</p> <p><b>Zugriffsformen, Rezeptions- und Recherchemöglichkeiten</b></p> |
| vom Interviewer thematisiert | verschiedene Verfahren der Strukturierung anbieten, z.B. Register, Katalog, Lexikon; neue Verfahren ausprobieren | noch zu testen                           | Organisation/Verwaltung   | \I12-12\ | <p>K 2.2b<br/>Leichte Zugänglichkeit, Übersicht durch Browser, Suchmasken, Ontologien, Klassifizierungen, Indizierungen, Strukturierungen</p> <p><b>Zugriffsformen, Rezeptions- und Recherchemöglichkeiten</b></p>                                                                                  |
| selbst thematisiert          | Zugriff auf Inhalte                                                                                              | Voraussetzung für Akzeptanz von TextGrid | Kollaboration/Kooperation | \I12-13\ | <p>K 2.1a<br/>kostenloser Zugriff auf unterschiedliche Repositorien bzw. Ressourcen (z.B. Wörterbücher), Quellen und Ausgaben/ Editionen, Vergleichsmöglichkeiten</p>                                                                                                                               |

## I12 Extraktion

|                                        |                                                                                                                                                                     |                               |                           |               |                                                                                                                                                                                                                                   |
|----------------------------------------|---------------------------------------------------------------------------------------------------------------------------------------------------------------------|-------------------------------|---------------------------|---------------|-----------------------------------------------------------------------------------------------------------------------------------------------------------------------------------------------------------------------------------|
|                                        |                                                                                                                                                                     |                               |                           |               | mit anderen Projekten/<br>Quellen, orts- und<br>rechnerunabhängiger<br>Zugriff<br><br><b>Zugriff auf Inhalte</b>                                                                                                                  |
| selbst thematisiert                    | neue Erkenntnisse durch<br>neue<br>Recherchemöglichkeiten,<br>Zugriff auf Vorarbeiten<br>anderer, die mir bislang<br>unbekannte externe<br>Quellen verknüpfen       | Vorstellbar                   | Kollaboration/Kooperation | \I12-15\      | K 2.1b<br>Kostenloser Zugriff auf<br>maschinell verarbeitete<br>Daten und<br>Forschungsergebnisse<br><br><b>Zugriff auf Inhalte</b>                                                                                               |
| selbst thematisiert                    | Lösungsweg zwischen<br>konzentrierter sparsamer<br>Information und<br>Überfülle, kein<br>Platzmangel mehr, neue<br>Verfahren/Zugänge<br>müssen entwickelt<br>werden | Herausforderung,<br>Erwartung |                           | \I12-15\      | K 2.2b<br>Leichte Zugänglichkeit,<br>Übersicht durch Browser,<br>Suchmasken, Ontologien,<br>Klassifizierungen,<br>Indizierungen,<br>Strukturierungen<br><br><b>Zugriffsformen,<br/>Rezeptions- und<br/>Recherchemöglichkeiten</b> |
| <b>K 3<br/>Produktion/Manipulation</b> |                                                                                                                                                                     |                               |                           |               |                                                                                                                                                                                                                                   |
| <i>Benennung</i>                       | <i>Beschreibung</i>                                                                                                                                                 | <i>Bewertung</i>              | <i>Bezug</i>              | <i>Quelle</i> | <i>Reduktion</i>                                                                                                                                                                                                                  |
| selbst thematisiert                    | es wurde nur ein<br>Ausschnitt aus TextGrid<br>präsentiert                                                                                                          | schade                        |                           | \I12-2\       | K 3.4a<br>Arbeitsumgebung mit Tool-<br>Angebot, nicht alles neu<br>/selbst programmieren,<br>kostenlos                                                                                                                            |

## I12 Extraktion

|                     |                                                                                                                                |                                                |  |         |                                                                                                                                                                                                                                                                                                                                                                                                                                   |
|---------------------|--------------------------------------------------------------------------------------------------------------------------------|------------------------------------------------|--|---------|-----------------------------------------------------------------------------------------------------------------------------------------------------------------------------------------------------------------------------------------------------------------------------------------------------------------------------------------------------------------------------------------------------------------------------------|
|                     |                                                                                                                                |                                                |  |         | <b>Produktionsunterstützung<br/>allgemein</b>                                                                                                                                                                                                                                                                                                                                                                                     |
| selbst thematisiert | Bildeditor                                                                                                                     | tolle Sache, zu<br>bescheiden präsentiert      |  | \I12-3\ | K 3.3d<br>Verknüpfungs-<br>möglichkeiten Text-Bild,<br>Transkriptions-/Faksimile-<br>Ansicht<br><br><b>Verknüpfungs-<br/>möglichkeiten und deren<br/>Visualisierung</b>                                                                                                                                                                                                                                                           |
| selbst thematisiert | Editor kann nicht so viel<br>wie andere<br>Spezialeditoren, das<br>Besondere ist seine<br>Vernetzung mit anderen<br>Ressourcen | weniger verstecken,<br>offensiver präsentieren |  | \I12-3\ | K 3.1a<br>eigener XML-Editor ist<br>nicht die Stärke von<br>TextGrid, andere sind<br>besser, nicht der richtige<br>Schwerpunkt<br><br><b>XML-Produktion</b><br>und<br>K 3.2a<br>Verknüpfung von Tools,<br>kreative Ansätze (z.B.<br>Wörterbücher zur<br>Kollationierung nutzen,<br>Lemmatisierung mit<br>Wörterbüchern verbinden),<br>interdisziplinäre Ansätze<br><br><b>Analyse- und<br/>Visualisierungs-<br/>möglichkeiten</b> |

## I12 Extraktion

|                            |                                                                                                      |                                               |  |         |                                                                                                                                                                                                                                                                                                                          |
|----------------------------|------------------------------------------------------------------------------------------------------|-----------------------------------------------|--|---------|--------------------------------------------------------------------------------------------------------------------------------------------------------------------------------------------------------------------------------------------------------------------------------------------------------------------------|
|                            |                                                                                                      |                                               |  |         |                                                                                                                                                                                                                                                                                                                          |
| selbst thematisiert        | Visualisierung der Unterschiede beim Vergleich von Texten, Bildeditor                                | sehr gespannt, Bedarf, sehnsüchtig erwartet   |  | \I12-4\ | <p>K 3.2b<br/>Unterschiede durch Textvergleich (Kollationierung, TBLE) visualisieren, Schreiberhände vergleichen, Textgenese, Entwicklungsprozess rekonstruieren und darstellen, Schichten und Räumlichkeit darstellen, multiperspektivische Zugang schaffen</p> <p><b>Analyse- und Visualisierungsmöglichkeiten</b></p> |
| vom Interviewer nachgehakt | Visualisierung Textvergleich, auf Zeichenebene, auf Satzebene, Gruppen von Unterschieden - Typologie | Interessant, nützlich und arbeitserleichternd |  | \I12-5\ | <p>K 3.2b<br/>Unterschiede durch Textvergleich (Kollationierung, TBLE) visualisieren, Schreiberhände vergleichen, Textgenese, Entwicklungsprozess rekonstruieren und darstellen, Schichten und Räumlichkeit darstellen, multiperspektivische Zugang schaffen</p> <p><b>Analyse- und Visualisierungs-</b></p>             |

## I12 Extraktion

|                                                           |                                                                                                                   |                |                   |          | <b>möglichkeiten</b>                                                                                                                                                                                                                       |
|-----------------------------------------------------------|-------------------------------------------------------------------------------------------------------------------|----------------|-------------------|----------|--------------------------------------------------------------------------------------------------------------------------------------------------------------------------------------------------------------------------------------------|
| selbst thematisiert                                       | Zugriff auf Services und Lösungen,<br>Ressourceneinsparung                                                        | großer Vorteil |                   | \I12-9\  | K 3.4a<br>Arbeitsumgebung mit Tool-Angebot, nicht alles neu /selbst programmieren, kostenlos<br><br><b>Produktionsunterstützung allgemein</b>                                                                                              |
| vom Interviewer thematisiert, vom Befragten konkretisiert | Kodierung nach TEI-Guidelines ermöglicht bessere Verarbeitung und Verknüpfung von Texten - z.B. mit Wörterbüchern | sehr gut       |                   | \I12-10\ | K 3.3a<br>Verknüpfungsmöglichkeiten Text-Text (z.B. editionswiss. Kommentarfunktionen, Varianten verknüpfen, Apparat, Quellen/Referenzen, Register, Wörterbücher, Briefe)<br><br><b>Verknüpfungsmöglichkeiten und deren Visualisierung</b> |
| vom Interviewer thematisiert, vom Befragten konkretisiert | Zusammenhänge visualisieren, dadurch besser erkennen und verarbeiten                                              | Vorteil        | Rezeption/Zugriff | \I12-11\ | K 3.3b<br>Visualisierung von Beziehungen (z. B. in Briefnetzen), Mustererkennung<br><br><b>Verknüpfungsmöglichkeiten und deren Visualisierung</b>                                                                                          |

## I12 Extraktion

|                                                           |                                                                                                                                                      |                        |                                            |          |                                                                                                                                                                                                                                 |
|-----------------------------------------------------------|------------------------------------------------------------------------------------------------------------------------------------------------------|------------------------|--------------------------------------------|----------|---------------------------------------------------------------------------------------------------------------------------------------------------------------------------------------------------------------------------------|
|                                                           |                                                                                                                                                      |                        |                                            |          |                                                                                                                                                                                                                                 |
| vom Interviewer thematisiert, vom Befragten konkretisiert | Visualisierung von Worthäufigkeiten und Kollokationen, Erschließung des Textthemas, weniger neue Erkenntnisse, sondern Erleichterung der Wahrnehmung | Vorstellbar            | Rezeption/Zugriff                          | \I12-14\ | K 3.2c<br>Visualisierung von Auszeichnungen, Worthäufigkeiten, Kollokationen, Themaerschließung, Mustererkennung<br><br><b>Analyse- und Visualisierungsmöglichkeiten</b>                                                        |
| selbst thematisiert                                       | Verknüpfung von Services, Programmen und Inhalten                                                                                                    | entscheidender Vorteil | Rezeption/Zugriff, Organisation/Verwaltung | \I12-17\ | K 3.2a<br>Verknüpfung von Tools, kreative Ansätze (z.B. Wörterbücher zur Kollationierung nutzen, Lemmatisierung mit Wörterbüchern verbinden), interdisziplinäre Ansätze<br><br><b>Analyse- und Visualisierungsmöglichkeiten</b> |
| selbst thematisiert                                       | Bildeditor und Vergleichsmodul noch nicht realisiert                                                                                                 | schade, Wunsch         | Produktion/Manipulation                    | \I12-17\ | K 3.3d<br>Verknüpfungsmöglichkeiten Text-Bild, Transkriptions-/Faksimile-Ansicht<br><br><b>Verknüpfungsmöglichkeiten und deren</b>                                                                                              |



## I12 Extraktion

|                                                           |                                                                                                                                              |                                                                          |                         |               |                                                                                                                                                                                                                                                         |
|-----------------------------------------------------------|----------------------------------------------------------------------------------------------------------------------------------------------|--------------------------------------------------------------------------|-------------------------|---------------|---------------------------------------------------------------------------------------------------------------------------------------------------------------------------------------------------------------------------------------------------------|
|                                                           |                                                                                                                                              |                                                                          |                         |               | <b>Visualisierung</b>                                                                                                                                                                                                                                   |
| <b>K 4</b><br><b>Modularität/Anpassbarkeit</b>            |                                                                                                                                              |                                                                          |                         |               |                                                                                                                                                                                                                                                         |
| <i>Benennung</i>                                          | <i>Beschreibung</i>                                                                                                                          | <i>Bewertung</i>                                                         | <i>Bezug</i>            | <i>Quelle</i> | <i>Reduktion</i>                                                                                                                                                                                                                                        |
| vom Interviewer thematisiert, vom Befragten konkretisiert | anpassbare Oberfläche                                                                                                                        | sehr gut                                                                 | Bedienungsbarkeit       | \I12-6\       | K 4.1a<br>Anpassung der Oberflächenkonfiguration<br><br><b>TextGrid-Oberfläche / Umgebung</b>                                                                                                                                                           |
| vom Interviewer thematisiert, vom Befragten konkretisiert | Werkzeuge nach eigenen Vorstellungen gestalten, selbst Werkzeuge anschließen, Datenaustausch zwischen Werkzeugen, Eclipse ist dafür geeignet | entscheidender Punkt, Eclipse gut geeignet                               | Produktion/Manipulation | \I12-7\       | K 4.2a<br>Anschließbarkeit und Kombinierbarkeit von Tools und Services, auch von selbstentwickelten – modulares Konzept und<br>K 4.2b<br>Anpassbarkeit von Tools an das jeweilige Projekt / die jeweiligen Gegenstände<br><br><b>Tools und Services</b> |
| <b>K 5</b><br><b>Kollaboration/Kooperation</b>            |                                                                                                                                              |                                                                          |                         |               |                                                                                                                                                                                                                                                         |
| <i>Benennung</i>                                          | <i>Beschreibung</i>                                                                                                                          | <i>Bewertung</i>                                                         | <i>Bezug</i>            | <i>Quelle</i> | <i>Reduktion</i>                                                                                                                                                                                                                                        |
| selbst thematisiert                                       | Ausrichtung auf weltweite Kollaboration, weltweite Vernetzung von Ressourcen                                                                 | große Stärke von TextGrid, in den nächsten Jahren bestimmendes Kriterium |                         | \I12-8\       | K 5.1a<br>Austausch von Ressourcen, Nachnutzung<br><br><b>Austausch von Inhalten und Werkzeugen</b>                                                                                                                                                     |

## I12 Extraktion

|                                                           |                                                                                                                                                                                              |                                                   |                                            |          |                                                                                                                                                                                      |
|-----------------------------------------------------------|----------------------------------------------------------------------------------------------------------------------------------------------------------------------------------------------|---------------------------------------------------|--------------------------------------------|----------|--------------------------------------------------------------------------------------------------------------------------------------------------------------------------------------|
|                                                           |                                                                                                                                                                                              |                                                   |                                            |          |                                                                                                                                                                                      |
| selbst thematisiert                                       | Austausch im Hinblick auf ähnlich gelagerte Fragestellungen, Rad nicht neu erfinden, ähnliche Lösungen anpassen                                                                              | große Vorteile                                    | Modularität/Anpassbarkeit                  | \I12-9\  | K 5.1c<br>Austausch von Arbeitsmitteln (Tools, Formaten, Skripten usw.)<br><br><b>Austausch von Inhalten und Werkzeugen</b>                                                          |
| vom Interviewer thematisiert, vom Befragten konkretisiert | Verknüpfung von Inhalten durch TEI-Guidelines unterstützt                                                                                                                                    | wichtig, Autoren müssen der Verknüpfung zustimmen | Rezeption/Zugriff, Organisation/Verwaltung | \I12-10\ | K 5.1a<br>Austausch von Ressourcen, Nachnutzung<br><br><b>Austausch von Inhalten und Werkzeugen</b>                                                                                  |
| selbst thematisiert                                       | Content muss von Usern/der Community kommen, Anbieter müssen erst mal die Infrastruktur programmieren                                                                                        | sinnvolle Aufteilung                              |                                            | \I12-13\ | K 5.3a<br>Partizipation/Nutzung als Voraussetzung<br><br><b>Community-Building-Aspekte</b>                                                                                           |
| selbst thematisiert                                       | TG-Workshops verstetigen, in gewissen Abständen ein Zusammentreffen zwischen TG-Leuten und potenziellen Nutzern gestalten, Erfahrungsaustausch bzgl. Fragestellungen, Problemen und Wünschen | gute Lösung                                       |                                            | \I12-13\ | K 5.3b<br>Community-Building erforderlich, Umdenken erforderlich, durch Überzeugungsarbeit, Veranstaltungen und Erfahrungsaustausch anregen<br><br><b>Community-Building-Aspekte</b> |

# I12 Extraktion

|                                |                     |                  |              |               |                  |
|--------------------------------|---------------------|------------------|--------------|---------------|------------------|
| <b>K 6</b>                     |                     |                  |              |               |                  |
| <b>Organisation/Verwaltung</b> |                     |                  |              |               |                  |
| <i>Benennung</i>               | <i>Beschreibung</i> | <i>Bewertung</i> | <i>Bezug</i> | <i>Quelle</i> | <i>Reduktion</i> |
| ---                            | ---                 | ---              | ---          | ---           | ---              |
