# Supplementary material
Source: publisher site journal article supplement (https://www.degruyterbrill.com/publication/isbn/9783110463927/downloadAsset/9783110463927_Extraktionen_Reduktionen_fallbezogen.zip)
Supplement: Supplementary file 5 [file I13 Extraktion und Reduktion.pdf › fallbezogene Extraktionen und Reduktionen/I13 Extraktion und Reduktion.pdf]

## I13 Extraktion

| <b>TÄTIGKEITEN UND EDV-ERFAHRUNG</b>                        |                                                                                                                                           |                                      |                                |               |                                                                                                                                                                |
|-------------------------------------------------------------|-------------------------------------------------------------------------------------------------------------------------------------------|--------------------------------------|--------------------------------|---------------|----------------------------------------------------------------------------------------------------------------------------------------------------------------|
| <b>Tätigkeiten</b>                                          |                                                                                                                                           |                                      |                                |               |                                                                                                                                                                |
| <i>Gegenstände</i>                                          | <i>Methoden/Verfahren</i>                                                                                                                 | <i>Ziele/Fragen</i>                  | <i>Institutioneller Rahmen</i> | <i>Quelle</i> |                                                                                                                                                                |
| Regesten, geschichtswissenschaftliche Forschungsgegenstände | Auszeichnung und Online-Bereitstellung, Datenbanken mit Web-Interface                                                                     | Online-Verfügbarkeit                 | Akademieprojekt                | \I13-1\       |                                                                                                                                                                |
| <b>Erfahrung</b>                                            |                                                                                                                                           |                                      |                                |               |                                                                                                                                                                |
|                                                             | <i>Beschreibung</i>                                                                                                                       | <i>Bewertung</i>                     |                                | <i>Quelle</i> |                                                                                                                                                                |
|                                                             | Online-Bereitstellung wissenschaftlicher Projektinhalte als Tätigkeit, Arbeit mit XML und TEI, Postgres-Datenbanken, Web-PHP, Open Source | Findet XML-Editoren schwer benutzbar |                                | \I13-1\       |                                                                                                                                                                |
|                                                             | Historiker, Auszeichnung in dem Bereich                                                                                                   | Weniger Techniker                    |                                | \I13-2\       |                                                                                                                                                                |
| <b>BEDARFSKATEGORIEN</b>                                    |                                                                                                                                           |                                      |                                |               |                                                                                                                                                                |
| <b>K 1 Bedienbarkeit</b>                                    |                                                                                                                                           |                                      |                                |               |                                                                                                                                                                |
| <i>Benennung</i>                                            | <i>Beschreibung</i>                                                                                                                       | <i>Bewertung</i>                     | <i>Bezug</i>                   | <i>Quelle</i> | <i>Reduktion</i>                                                                                                                                               |
| selbst thematisiert                                         | Nutzerfreundlichkeit von XML-Editoren allgemein                                                                                           | schwierig                            | Produktion/Manipulation        | \I13-1\       | K 1.1.a<br>zu schwierig / technisch für fachwissenschaftliche Nutzer, steile Lernkurve für herkömmlich Edierende<br><br><b>Benutzerführung / Erlernbarkeit</b> |
| selbst thematisiert                                         | Stabilität war mangelhaft, ständig Abstürze                                                                                               | mangelhaft                           |                                | \I13-8\       | K 1.3b<br>zu unstabil, zu viele Programmierfehler, noch nicht einsetzbar                                                                                       |

# I13 Extraktion

|                                                           |                                                                                                                                                                                     |                                                   |              |               |                                                                                                                                                                                           |
|-----------------------------------------------------------|-------------------------------------------------------------------------------------------------------------------------------------------------------------------------------------|---------------------------------------------------|--------------|---------------|-------------------------------------------------------------------------------------------------------------------------------------------------------------------------------------------|
|                                                           |                                                                                                                                                                                     |                                                   |              |               | <b>Systemstabilität,<br/>Programmierfehler</b>                                                                                                                                            |
| vom Interviewer thematisiert, vom Befragten konkretisiert | muss ein bisschen Aussehen wie Word und schnell und einfach zu bedienen sein                                                                                                        | Wichtiger Punkt, bei TG schlecht umgesetzt        |              | \I13-9\       | K 1.4b<br>Arbeiten wie in der „normalen“ Textverarbeitung ermöglichen, Vermeidung von spitzen Klammern, XML-Generierung im Hintergrund<br><br><b>Bedienbarkeit der Auszeichnungsebene</b> |
| selbst thematisiert                                       | technische Stabilität                                                                                                                                                               | mangelhaft                                        |              | \I13-11\      | K 1.3b<br>zu unstabil, zu viele Programmierfehler, noch nicht einsetzbar<br><br><b>Systemstabilität,<br/>Programmierfehler</b>                                                            |
| <b>K 2<br/>Rezeption/Zugriff</b>                          |                                                                                                                                                                                     |                                                   |              |               |                                                                                                                                                                                           |
| <i>Benennung</i>                                          | <i>Beschreibung</i>                                                                                                                                                                 | <i>Bewertung</i>                                  | <i>Bezug</i> | <i>Quelle</i> | <i>Reduktion</i>                                                                                                                                                                          |
| selbst thematisiert                                       | Bereitstellung digitalisierter Quellen in einem größeren Zusammenhang, bspw. in einer digitalen Nationalbibliothek, als Möglichkeit, neue Erkenntnisse zu gewinnen, z.B. Abgleiche/ | Potenzial für neue wissenschaftliche Erkenntnisse |              | \I13-6\       | K 2.1a<br>kostenloser Zugriff auf unterschiedliche Repositorien bzw. Ressourcen (z.B. Wörterbücher), Quellen und Ausgaben/ Editionen, Vergleichsmöglichkeiten                             |

## I13 Extraktion

|                                                           |                                                                                                                                                                                      |                                |                         |          |                                                                                                                                                                                                                                                                                                        |
|-----------------------------------------------------------|--------------------------------------------------------------------------------------------------------------------------------------------------------------------------------------|--------------------------------|-------------------------|----------|--------------------------------------------------------------------------------------------------------------------------------------------------------------------------------------------------------------------------------------------------------------------------------------------------------|
|                                                           | Mustererkennung über reguläre Ausdrücke --> Einsparung von Auszeichnungen                                                                                                            |                                |                         |          | mit anderen Projekten/<br>Quellen, orts- und rechnerunabhängiger Zugriff<br><br><b>Zugriff auf Inhalte</b>                                                                                                                                                                                             |
| vom Interviewer thematisiert, vom Befragten konkretisiert | Ordnungsstrukturen im Quellenberg suchen als Sinn der wissenschaftlichen Arbeit, nicht alles mit allem verknüpfen, Fokus geht sonst verloren, Funktion und Dauerhaftigkeit von Links | Sinn wissenschaftlicher Arbeit | Organisation/Verwaltung | \I13-7\  | K 2.2b<br>Leichte Zugänglichkeit, Übersicht durch Browser, Suchmasken, Ontologien, Klassifizierungen, Indizierungen, Strukturierungen<br><br><b>Zugriffsformen, Rezeptions- und Recherchemöglichkeiten</b>                                                                                             |
| selbst thematisiert                                       | Zugriff auf ein Archiv für die Forschungscommunity für linguistische und unterschiedliche inhaltliche Fragestellungen                                                                | Wichtig                        |                         | \I13-13\ | K 2.2a<br>Spezifizierbarkeit des Zugriffs, fachspezifische Zugriffsmöglichkeiten, verschiedene Zugriffsperspektiven durch Auszeichnungen und Präsentationsformen (z.B. parallele Ansicht von Faksimile und Transkription im TBLE)<br><br><b>Zugriffsformen, Rezeptions- und Recherchemöglichkeiten</b> |

# I13 Extraktion

|                                        |                                                                                                                                                                                                                               |                                                             |                         |               |                                                                                                                                                                                                                                            |
|----------------------------------------|-------------------------------------------------------------------------------------------------------------------------------------------------------------------------------------------------------------------------------|-------------------------------------------------------------|-------------------------|---------------|--------------------------------------------------------------------------------------------------------------------------------------------------------------------------------------------------------------------------------------------|
| selbst thematisiert                    | XML-Bilder von Büchern einspielen, als Auszeichnungsmerkmale die Metainformationen bzw. Ordnungsstrukturen eines Buches und den Volltext, das wäre ein gemeinsamer Standard, den jeder versteht, auch disziplinenübergreifend | Wäre eine gute Basis                                        | Organisation/Verwaltung | \I13-14\      | K 2.2b<br>Leichte Zugänglichkeit, Übersicht durch Browser, Suchmasken, Ontologien, Klassifizierungen, Indizierungen, Strukturierungen<br><br><b>Zugriffsformen, Rezeptions- und Recherchemöglichkeiten</b>                                 |
| <b>K 3<br/>Produktion/Manipulation</b> |                                                                                                                                                                                                                               |                                                             |                         |               |                                                                                                                                                                                                                                            |
| <i>Benennung</i>                       | <i>Beschreibung</i>                                                                                                                                                                                                           | <i>Bewertung</i>                                            | <i>Bezug</i>            | <i>Quelle</i> | <i>Reduktion</i>                                                                                                                                                                                                                           |
| selbst thematisiert                    | Erstellung und mehrstufige Verwaltung von Registern für Orte, Personen, Sachen, das man verlinken kann                                                                                                                        | bisher kein Tool, kein XML-Editor, der das kann             |                         | \I13-2\       | K 3.3a<br>Verknüpfungsmöglichkeiten Text-Text (z.B. editionswiss. Kommentarfunktionen, Varianten verknüpfen, Apparat, Quellen/Referenzen, Register, Wörterbücher, Briefe)<br><br><b>Verknüpfungsmöglichkeiten und deren Visualisierung</b> |
| selbst thematisiert                    | TEI-ausgezeichnete Daten einlesen                                                                                                                                                                                             | interessant, wäre schön, wenn es besser funktionieren würde |                         | \I13-8\       | K 3.1b<br>XML-Auszeichnungs- bzw. Produktionshilfe, Tools zur digitalen Herstellung und                                                                                                                                                    |

# I13 Extraktion

|                                  |                                                                                                                      |                                                                                                                                              |                         |               |                                                                                                                                                                                                                                                        |
|----------------------------------|----------------------------------------------------------------------------------------------------------------------|----------------------------------------------------------------------------------------------------------------------------------------------|-------------------------|---------------|--------------------------------------------------------------------------------------------------------------------------------------------------------------------------------------------------------------------------------------------------------|
|                                  |                                                                                                                      |                                                                                                                                              |                         |               | Verfügbarmachung von Texten, XML-Schemata vorgefertigt für verschiedene individuelle Bedürfnisse, Konvertierung in XML/TEI, Baseline Encoding, Streaming Editor, Unterstützung bei zunächst geringerer Auszeichnungstiefe<br><br><b>XML-Produktion</b> |
| <b>K 4</b>                       |                                                                                                                      |                                                                                                                                              |                         |               |                                                                                                                                                                                                                                                        |
| <b>Modularität/Anpassbarkeit</b> |                                                                                                                      |                                                                                                                                              |                         |               |                                                                                                                                                                                                                                                        |
| <i>Benennung</i>                 | <i>Beschreibung</i>                                                                                                  | <i>Bewertung</i>                                                                                                                             | <i>Bezug</i>            | <i>Quelle</i> | <i>Reduktion</i>                                                                                                                                                                                                                                       |
| selbst thematisiert              | XML-Editoren, die genau die Bedürfnisse der Editoren treffen                                                         | Wunsch, schwierig                                                                                                                            | Produktion/Manipulation | \I13-1\       | K 4.2b<br>Anpassbarkeit von Tools an das jeweilige Projekt / die jeweiligen Gegenstände<br><br><b>Tools und Services</b>                                                                                                                               |
| selbst thematisiert              | gemeinsamer technischer Ansatz zur Erfüllung aller Anforderungen von allen Fachgebieten in den Geisteswissenschaften | mittelfristig nicht möglich, beim Test zu spezifisch auf Wörterbücher zugeschnitten, Entwicklung bräuchte zu lange, Technik wäre weggelaufen | Produktion/Manipulation | \I13-2\       | K 4.2b<br>Anpassbarkeit von Tools an das jeweilige Projekt / die jeweiligen Gegenstände<br><br><b>Tools und Services</b>                                                                                                                               |
| vom Interviewer thematisiert     | Schnittstellen zum Anschließen von eigenen                                                                           | zu wenig Techniker, um das zu beurteilen                                                                                                     | Produktion/Manipulation | \I13-2\       | K 4.2b<br>Anpassbarkeit von Tools                                                                                                                                                                                                                      |

# I13 Extraktion

|                                                                 |                                                                                                                                                                  |                                                         |                         |               |                                                                                                                                                                                                            |
|-----------------------------------------------------------------|------------------------------------------------------------------------------------------------------------------------------------------------------------------|---------------------------------------------------------|-------------------------|---------------|------------------------------------------------------------------------------------------------------------------------------------------------------------------------------------------------------------|
|                                                                 | spezifischen Tools                                                                                                                                               |                                                         |                         |               | an das jeweilige Projekt /<br>die jeweiligen<br>Gegenstände<br><br><b>Tools und Services</b>                                                                                                               |
| <b>K 5<br/>Kollaboration/Kooperation</b>                        |                                                                                                                                                                  |                                                         |                         |               |                                                                                                                                                                                                            |
| <i>Benennung</i>                                                | <i>Beschreibung</i>                                                                                                                                              | <i>Bewertung</i>                                        | <i>Bezug</i>            | <i>Quelle</i> | <i>Reduktion</i>                                                                                                                                                                                           |
| selbst thematisiert                                             | gemeinsam nutzbarer Editor                                                                                                                                       | Riesenvorteil, große<br>Arbeitserleichterung            | Produktion/Manipulation | \I13-3\       | K 5.2a<br>Zusammenarbeit in Teams<br>von verschiedenen Orten<br>aus, auch an einem<br>Dokument, verteilte<br>Bearbeitung verschiedener<br>'Schichten' eines<br>Dokuments usw.<br><br><b>Zusammenarbeit</b> |
| vom Interviewer<br>thematisiert, vom Befragten<br>konkretisiert | von verschiedenen<br>Arbeitsplätzen und Orten<br>aus online an einem Werk<br>arbeiten, gemeinsames<br>Register, gemeinsame<br>kollaborative<br>Editionsplattform | Arbeitserleichterung,<br>in Zukunft wichtiger<br>Ansatz | Produktion/Manipulation | \I13-4\       | K 5.2a<br>Zusammenarbeit in Teams<br>von verschiedenen Orten<br>aus, auch an einem<br>Dokument, verteilte<br>Bearbeitung verschiedener<br>'Schichten' eines<br>Dokuments usw.<br><br><b>Zusammenarbeit</b> |
| selbst thematisiert                                             | Standards in Verbindung<br>mit Nachhaltigkeit,<br>Verbindung mit<br>Auszeichnungstiefe, Tiefe                                                                    | Wichtig, Problem                                        | Produktion/Manipulation | \I13-5\       | K 5.1d<br>Standards, TEI,<br>Unabhängigkeit von<br>Datenformaten                                                                                                                                           |

# I13 Extraktion

|                     |                                                                                                                               |                                                                                  |                                                    |          |                                                                                                                                                                                                                                                                                                                   |
|---------------------|-------------------------------------------------------------------------------------------------------------------------------|----------------------------------------------------------------------------------|----------------------------------------------------|----------|-------------------------------------------------------------------------------------------------------------------------------------------------------------------------------------------------------------------------------------------------------------------------------------------------------------------|
|                     | darf nicht zu ausgeprägt sein, damit Standards gefunden werden, gemeinsam flache Auszeichnung, jeweils spezifische Vertiefung |                                                                                  |                                                    |          | <b>Austausch von Inhalten und Werkzeugen</b>                                                                                                                                                                                                                                                                      |
| selbst thematisiert | kollaboratives Editionswerkzeug, gemeinsam an einer Sache arbeiten mit Registerverwaltung                                     | Ausrichtung im TG-Workshop zu einseitig in Richtung Germanistik und Wörterbücher | Produktion/Manipulation, Modularität/Anpassbarkeit | \I13-8\  | K 5.2a<br>Zusammenarbeit in Teams von verschiedenen Orten aus, auch an einem Dokument, verteilte Bearbeitung verschiedener ‚Schichten‘ eines Dokuments usw.<br><br><b>Zusammenarbeit</b>                                                                                                                          |
| selbst thematisiert | kollaborativer Ansatz, Standards, XML, von überall benutzbar                                                                  | sehr gut, größter Fortschritt, zukunftsweisend                                   |                                                    | \I13-11\ | K 5.1d<br>Standards, TEI, Unabhängigkeit von Datenformaten<br><br><b>Austausch von Inhalten und Werkzeugen</b><br>und<br>K 5.2a<br>Zusammenarbeit in Teams von verschiedenen Orten aus, auch an einem Dokument, verteilte Bearbeitung verschiedener ‚Schichten‘ eines Dokuments usw.<br><br><b>Zusammenarbeit</b> |

# I13 Extraktion

|                                        |                                                                                                                                                 |                                                                   |                   |               |                                                                                                                                                                               |
|----------------------------------------|-------------------------------------------------------------------------------------------------------------------------------------------------|-------------------------------------------------------------------|-------------------|---------------|-------------------------------------------------------------------------------------------------------------------------------------------------------------------------------|
|                                        |                                                                                                                                                 |                                                                   |                   |               |                                                                                                                                                                               |
| selbst thematisiert                    | Fokussierung auf Features, die nur auf einen kleinen Teil der Wissenschaftcommunity ausgerichtet sind                                           | negativ im TG-Test                                                |                   | \I13-11\      | K 5.1c<br>Austausch von Arbeitsmitteln (Tools, Formaten, Skripten usw.)<br><br><b>Austausch von Inhalten und Werkzeugen</b>                                                   |
| <b>K 6<br/>Organisation/Verwaltung</b> |                                                                                                                                                 |                                                                   |                   |               |                                                                                                                                                                               |
| <i>Benennung</i>                       | <i>Beschreibung</i>                                                                                                                             | <i>Bewertung</i>                                                  | <i>Bezug</i>      | <i>Quelle</i> | <i>Reduktion</i>                                                                                                                                                              |
| selbst thematisiert                    | Speicherung, Nachhaltigkeit der IT-Infrastruktur, technische Grundlagen dafür, Bsp. Update einer Datenbank, Auslaufen einer Projektfinanzierung | schwierig, Problem, verbunden mit der Frage nach Standards        |                   | \I13-5\       | K 6.1b<br>Datenspeicherung und -verwaltung, Langzeitarchivierung, verbunden mit Bearbeitungsmöglichkeiten und Nachnutzung<br><br><b>Austausch von Inhalten und Werkzeugen</b> |
| selbst thematisiert                    | Identifikationsmechanismus                                                                                                                      | sinnvoll, aber zu hohe Priorität im Vergleich zu anderen Features |                   | \I13-12\      | K 6.2a<br>Workflow-Organisation, Projekt-Verwaltung<br><br><b>Organisation und Verwaltung von Arbeitsprozessen</b>                                                            |
| selbst thematisiert                    | Archivfunktion, volltextdurchsuchbare XML-Dateien für die                                                                                       | sehr wichtig                                                      | Rezeption/Zugriff | \I13-13\      | K 6.1b<br>Datenspeicherung und -verwaltung,                                                                                                                                   |



### I13 Extraktion

|  |                                                                   |  |  |  |                                                                                                                                                     |
|--|-------------------------------------------------------------------|--|--|--|-----------------------------------------------------------------------------------------------------------------------------------------------------|
|  | Community verfügbar,<br>Langzeitarchivierung, auch<br>von Bildern |  |  |  | Langzeitarchivierung,<br>verbunden mit<br>Bearbeitungs-<br>möglichkeiten und<br>Nachnutzung<br><br><b>Austausch von Inhalten<br/>und Werkzeugen</b> |
|--|-------------------------------------------------------------------|--|--|--|-----------------------------------------------------------------------------------------------------------------------------------------------------|
