# Supplementary material
Source: publisher site journal article supplement (https://www.degruyterbrill.com/publication/isbn/9783110463927/downloadAsset/9783110463927_Extraktionen_Reduktionen_fallbezogen.zip)
Supplement: Supplementary file 6 [file I14 Extraktion und Reduktion.pdf › fallbezogene Extraktionen und Reduktionen/I14 Extraktion und Reduktion.pdf]

## I14 Extraktion

| <b>TÄTIGKEITEN UND EDV-ERFAHRUNG</b>                                                              |                                                                                                |                                                                 |                                |               |                                                                                                                                       |
|---------------------------------------------------------------------------------------------------|------------------------------------------------------------------------------------------------|-----------------------------------------------------------------|--------------------------------|---------------|---------------------------------------------------------------------------------------------------------------------------------------|
| <b>Tätigkeiten</b>                                                                                |                                                                                                |                                                                 |                                |               |                                                                                                                                       |
| <i>Gegenstände</i>                                                                                | <i>Methoden/Verfahren</i>                                                                      | <i>Ziele/Fragen</i>                                             | <i>Institutioneller Rahmen</i> | <i>Quelle</i> |                                                                                                                                       |
| Online-Edition, Glossen-Editionen, Kommentierungstraditionen, klassische Philologie, Mittellatein | Hypertext-Edition                                                                              | Präsentation als Hypertext                                      | zwei Teilprojekte, Universität | \I14-1\       |                                                                                                                                       |
| <b>Erfahrung</b>                                                                                  |                                                                                                |                                                                 |                                |               |                                                                                                                                       |
|                                                                                                   | <i>Beschreibung</i>                                                                            | <i>Bewertung</i>                                                |                                | <i>Quelle</i> |                                                                                                                                       |
|                                                                                                   | Online-Edition, mehr Fachwissenschaftler als Techniker, Mittellatein, Mathematik, Physik       |                                                                 |                                | \I14-1\       |                                                                                                                                       |
|                                                                                                   | Erfahrung mit XML-Editor und TEI                                                               |                                                                 |                                | \I14-6\       |                                                                                                                                       |
|                                                                                                   | keine Eclipse-Erfahrung                                                                        | nicht vorhanden                                                 |                                | \I14-9\       |                                                                                                                                       |
| <b>BEDARFSKATEGORIEN</b>                                                                          |                                                                                                |                                                                 |                                |               |                                                                                                                                       |
| <b>K 1</b>                                                                                        |                                                                                                |                                                                 |                                |               |                                                                                                                                       |
| <b>Bedienbarkeit</b>                                                                              |                                                                                                |                                                                 |                                |               |                                                                                                                                       |
| <i>Benennung</i>                                                                                  | <i>Beschreibung</i>                                                                            | <i>Bewertung</i>                                                | <i>Bezug</i>                   | <i>Quelle</i> | <i>Reduktion</i>                                                                                                                      |
| selbst thematisiert                                                                               | Benutzerfreundlichkeit                                                                         | Man hat in relativ kurzer Zeit gemerkt: Damit kann man arbeiten | Produktion/Manipulation        | \I14-2\       | K 1.1d<br>mit mehr EDV-Erfahrung (z.B. mit Eclipse) schnell erlernbar und gut bedienbar<br><br><b>Benutzerführung / Erlernbarkeit</b> |
| vom Interviewer thematisiert, vom Befragten konkretisiert                                         | Erledigen der Workshop-Aufgabe, hat irgendwo den Faden verloren und ist nicht mehr mitgekommen | negativ bewertet im Fragebogen                                  | Produktion/Manipulation        | \I14-3\       | K 1.2c<br>Zurechtfinden, Komponenten und Sichten zuordnen ist                                                                         |

# I14 Extraktion

|                              |                                                                        |                                        |                         |         |                                                                                                                                                                                                                                                          |
|------------------------------|------------------------------------------------------------------------|----------------------------------------|-------------------------|---------|----------------------------------------------------------------------------------------------------------------------------------------------------------------------------------------------------------------------------------------------------------|
|                              |                                                                        |                                        |                         |         | <p>am Anfang schwierig (evtl. gewohnte Website- und Ordnerstrukturierung besser)</p> <p><b>Orientierung / Übersichtlichkeit / Oberflächengestaltung</b></p>                                                                                              |
| selbst thematisiert          | Verlinkung hat nicht funktioniert, einiges hat noch nicht funktioniert | macht ja nichts, Entwicklungspotenzial | Produktion/Manipulation | \I14-5\ | <p>K 1.3a<br/>Kinderkrankheiten sind normal, ist noch in der Entwicklung</p> <p><b>Systemstabilität, Programmierfehler</b></p>                                                                                                                           |
| vom Interviewer thematisiert | Zurechtfinden vor dem Hintergrund der angestrebten Komplexität         | relativ schnell zu durchschauen, gut   |                         | \I14-9\ | <p>K 1.1d<br/>mit mehr EDV-Erfahrung (z.B. mit Eclipse) schnell erlernbar und gut bedienbar</p> <p><b>Benutzerführung / Erlernbarkeit</b> und<br/>K 1.2a<br/>Oberfläche ist übersichtlich, sachlich</p> <p><b>Orientierung / Übersichtlichkeit /</b></p> |

|                                        |                                                                                                |                    |               |               |                                                                                                                                                                                                                                                                                                           |
|----------------------------------------|------------------------------------------------------------------------------------------------|--------------------|---------------|---------------|-----------------------------------------------------------------------------------------------------------------------------------------------------------------------------------------------------------------------------------------------------------------------------------------------------------|
|                                        |                                                                                                |                    |               |               | <b>Oberflächengestaltung</b>                                                                                                                                                                                                                                                                              |
| <b>K 2<br/>Rezeption/Zugriff</b>       |                                                                                                |                    |               |               |                                                                                                                                                                                                                                                                                                           |
| <i>Benennung</i>                       | <i>Beschreibung</i>                                                                            | <i>Bewertung</i>   | <i>Bezug</i>  | <i>Quelle</i> | <i>Reduktion</i>                                                                                                                                                                                                                                                                                          |
| vom Interviewer thematisiert           | Recherchemöglichkeiten:<br>Goethewörterbuch unvollständig                                      | nicht viel da      |               | I14-4\        | K 2.1a<br>kostenloser Zugriff auf<br>unterschiedliche<br>Repositorien bzw.<br>Ressourcen (z.B.<br>Wörterbücher),<br>Quellen und Ausgaben/<br>Editionen,<br>Vergleichsmöglichkeiten<br>mit anderen<br>Projekten/ Quellen,<br>orts- und<br>rechnerunabhängiger<br>Zugriff<br><br><b>Zugriff auf Inhalte</b> |
| <b>K 3<br/>Produktion/Manipulation</b> |                                                                                                |                    |               |               |                                                                                                                                                                                                                                                                                                           |
| <i>Benennung</i>                       | <i>Beschreibung</i>                                                                            | <i>Bewertung</i>   | <i>Bezug</i>  | <i>Quelle</i> | <i>Reduktion</i>                                                                                                                                                                                                                                                                                          |
| selbst thematisiert                    | Anwendungsmöglichkeiten,<br>man konnte im TG-Workshop<br>noch nicht viel machen, wenig<br>Zeit | etwas enttäuschend | Bedienbarkeit | I14-2\        | K 3.4a<br>Arbeitsumgebung mit<br>Tool-Angebot, nicht<br>alles neu /selbst<br>programmieren,<br>kostenlos<br><br><b>Produktionsunterstützung allgemein</b>                                                                                                                                                 |

# I14 Extraktion

|                                                           |                                                                                                  |                                                                                                                                                               |               |          |                                                                                                                                                                                                                                                                                                                                                 |
|-----------------------------------------------------------|--------------------------------------------------------------------------------------------------|---------------------------------------------------------------------------------------------------------------------------------------------------------------|---------------|----------|-------------------------------------------------------------------------------------------------------------------------------------------------------------------------------------------------------------------------------------------------------------------------------------------------------------------------------------------------|
|                                                           |                                                                                                  |                                                                                                                                                               |               |          |                                                                                                                                                                                                                                                                                                                                                 |
| selbst thematisiert                                       | automatisch TEI-Header generieren, Anzeige von Strukturfehlern                                   | fortschrittlich, hat aber nicht richtig funktioniert                                                                                                          | Bedienbarkeit | \I14-6\  | K 3.1b<br>XML-Auszeichnungs- bzw. Produktionshilfe, Tools zur digitalen Herstellung und Verfügbarmachung von Texten, XML-Schemata vorgefertigt für verschiedene individuelle Bedürfnisse, Konvertierung in XML/ TEI, Baseline Encoding, Streaming Editor, Unterstützung bei zunächst geringerer Auszeichnungstiefe<br><br><b>XML-Produktion</b> |
| selbst thematisiert                                       | vorgestellte Text-Bild-Verlinkung                                                                | Vor allem im Sinn, hätten wir gerne, reicht aber nicht ganz aus für unsere Zwecke, zu wenig offen für kompliziertere Textstrukturen wie in Glossenkommentaren |               | \I14-7\  | K 3.3d<br>Verknüpfungsmöglichkeiten Text-Bild, Transkriptions-/Faksimile-Ansicht<br><br><b>Verknüpfungsmöglichkeiten und deren Visualisierung</b>                                                                                                                                                                                               |
| vom Interviewer thematisiert, vom Befragten konkretisiert | Repräsentation der Textstruktur, Verknüpfung von kommentierendem und kommentierten Texten, Netz, |                                                                                                                                                               |               | \I14-15\ | K 3.3a<br>Verknüpfungsmöglichkeiten Text-Text (z.B. editionswiss.                                                                                                                                                                                                                                                                               |

## I14 Extraktion

|                                                |                                                                        |                                             |                         |               |                                                                                                                                                                          |
|------------------------------------------------|------------------------------------------------------------------------|---------------------------------------------|-------------------------|---------------|--------------------------------------------------------------------------------------------------------------------------------------------------------------------------|
|                                                | aber im Mittellatein auch Abschriften                                  |                                             |                         |               | Kommentarfunktionen, Varianten verknüpfen, Apparat, Quellen/Referenzen, Register, Wörterbücher, Briefe)<br><br><b>Verknüpfungsmöglichkeiten und deren Visualisierung</b> |
| <b>K 4</b><br><b>Modularität/Anpassbarkeit</b> |                                                                        |                                             |                         |               |                                                                                                                                                                          |
| <i>Benennung</i>                               | <i>Beschreibung</i>                                                    | <i>Bewertung</i>                            | <i>Bezug</i>            | <i>Quelle</i> | <i>Reduktion</i>                                                                                                                                                         |
| vom Interviewer thematisiert                   | eigene Tools einbinden, spezielles, selbst entwickeltes Text-Bild-Tool | Würden wir gerne                            | Produktion/Manipulation | \I14-8\       | K 4.2a<br>Anschließbarkeit und Kombinierbarkeit von Tools und Services, auch von selbstentwickelten – modulares Konzept<br><br><b>Tools und Services</b>                 |
| vom Interviewer thematisiert                   | Vielfältige Anpassungsmöglichkeiten der Oberfläche                     | beeindruckend, in der Praxis erst mal sehen | Produktion/Manipulation | \I14-8\       | K 4.1a<br>Anpassung der Oberflächen-Konfiguration<br><br><b>TextGrid-Oberfläche / Umgebung</b>                                                                           |
| <b>K 5</b><br><b>Kollaboration/Kooperation</b> |                                                                        |                                             |                         |               |                                                                                                                                                                          |

# I14 Extraktion

| <i>Benennung</i>             | <i>Beschreibung</i>                                                                                                                                                               | <i>Bewertung</i>                                                                                                                | <i>Bezug</i>                       | <i>Quelle</i> | <i>Reduktion</i>                                                                                                                                                                                 |
|------------------------------|-----------------------------------------------------------------------------------------------------------------------------------------------------------------------------------|---------------------------------------------------------------------------------------------------------------------------------|------------------------------------|---------------|--------------------------------------------------------------------------------------------------------------------------------------------------------------------------------------------------|
| selbst thematisiert          | Anforderungen von Standards als Voraussetzung für die Anbindung von Tools                                                                                                         | skeptisch, ob das eigene Projekt die Standards erfüllen kann                                                                    | Anpassung, Produktion/Manipulation | \I14-8\       | K 5.1c<br>Austausch von Arbeitsmitteln (Tools, Formaten, Skripten usw.)<br>und<br>K 5.1d<br>Standards, TEI, Unabhängigkeit von Datenformaten<br><br><b>Austausch von Inhalten und Werkzeugen</b> |
| vom Interviewer thematisiert | kollaborativer Ansatz, bisher E-Mail-Verkehr und netzwerkintern per Adobe Professional-Kommentierung, Konflikte beim gleichzeitigen Bearbeiten von Dateien                        | Wichtig, muss man probieren                                                                                                     | Produktion/Manipulation            | \I14-10\      | K 5.2a<br>Zusammenarbeit in Teams von verschiedenen Orten aus, auch an einem Dokument, verteilte Bearbeitung verschiedener ‚Schichten‘ eines Dokuments usw.<br><br><b>Zusammenarbeit</b>         |
| selbst thematisiert          | Zu viel Arbeit für ein Projekt, gerade bei großen Handschriften mit vielen Glossen werden einzelne Teile bearbeitet und dazu separat publiziert, der Blick für das Ganze geht oft | Verbesserungsmöglichkeit, Handschriften enthalten das Konzept der Zusammenarbeit, z.B. Kommentierung und Nutzung des gelassenen | Produktion/Manipulation            | \I14-11\      | K 5.2a<br>Zusammenarbeit in Teams von verschiedenen Orten aus, auch an einem Dokument, verteilte                                                                                                 |

# I14 Extraktion

|                                        |                                                                                                                        |                                                    |                   |               |                                                                                                                                                                                          |
|----------------------------------------|------------------------------------------------------------------------------------------------------------------------|----------------------------------------------------|-------------------|---------------|------------------------------------------------------------------------------------------------------------------------------------------------------------------------------------------|
|                                        | verloren, wer sich speziell damit beschäftigen will, muss wieder von vorne anfangen, Blick auf das Ganze organisieren  | Raums in der Handschrift über mehrere Generationen |                   |               | Bearbeitung verschiedener ‚Schichten‘ eines Dokuments usw.<br><br><b>Zusammenarbeit</b>                                                                                                  |
| selbst thematisiert                    | möglicherweise neue Erkenntnisse durch Kollaboration von verschiedenen Orten aus, wenn man sieht, was der andere macht | vorstellbar                                        | Rezeption/Zugriff | \I14-13\      | K 5.2a<br>Zusammenarbeit in Teams von verschiedenen Orten aus, auch an einem Dokument, verteilte Bearbeitung verschiedener ‚Schichten‘ eines Dokuments usw.<br><br><b>Zusammenarbeit</b> |
| <b>K 6<br/>Organisation/Verwaltung</b> |                                                                                                                        |                                                    |                   |               |                                                                                                                                                                                          |
| <i>Benennung</i>                       | <i>Beschreibung</i>                                                                                                    | <i>Bewertung</i>                                   | <i>Bezug</i>      | <i>Quelle</i> | <i>Reduktion</i>                                                                                                                                                                         |
| selbst thematisiert                    | Langzeitspeicherung und Verfügbarhaltung von Daten auch wenn zeitweise die Arbeitskraft fehlt                          |                                                    | Rezeption/Zugriff | \I14-12\      | K 6.1b<br>Datenspeicherung und –verwaltung, Langzeitarchivierung, verbunden mit Bearbeitungsmöglichkeiten und Nachnutzung<br><br><b>Organisation und Verwaltung von Inhalten</b>         |

# I14 Extraktion

|                                                           |                                                                                                                                                                     |                                                         |                         |          |                                                                                                                                                                                                                                                                   |
|-----------------------------------------------------------|---------------------------------------------------------------------------------------------------------------------------------------------------------------------|---------------------------------------------------------|-------------------------|----------|-------------------------------------------------------------------------------------------------------------------------------------------------------------------------------------------------------------------------------------------------------------------|
|                                                           |                                                                                                                                                                     |                                                         |                         |          |                                                                                                                                                                                                                                                                   |
| vom Interviewer thematisiert, vom Befragten konkretisiert | Publish-Button verführt zum Veröffentlichen, nach Fehlern nochmal, kann eine große Datenmenge ergeben, Gefahr, sich darin zu verlieren, Redigieren, Plattenspeicher | hatte das Gefühl, dass die Gefahr besteht, ist gespannt | Produktion/Manipulation | \I14-14\ | K 6.1d<br>Eigene Sichtbarkeit, Publikationsmöglichkeit<br><br><b>Organisation und Verwaltung von Inhalten</b>                                                                                                                                                     |
| selbst thematisiert                                       | Garantie stabiler URLs, Langzeitspeicherung von Handschriften-Digitalisaten                                                                                         | unglaublich wichtig                                     |                         | \I14-16\ | K 6.1b<br>Datenspeicherung und –verwaltung, Langzeitarchivierung, verbunden mit Bearbeitungsmöglichkeiten und Nachnutzung und<br>K 6.1c<br>Adressierung, Zitierbarkeit, Urheberrecht, Leistungsanerkennung<br><br><b>Organisation und Verwaltung von Inhalten</b> |
