# Supplementary material
Source: publisher site journal article supplement (https://www.degruyterbrill.com/publication/isbn/9783110463927/downloadAsset/9783110463927_Extraktionen_Reduktionen_fallbezogen.zip)
Supplement: Supplementary file 7 [file I15 Extraktion und Reduktion.pdf › fallbezogene Extraktionen und Reduktionen/I15 Extraktion und Reduktion.pdf]

## I15 Extraktion

|                                                           |                                                                           |                                                                                                                                                                                                    |                                |               |                                                                                                                                           |
|-----------------------------------------------------------|---------------------------------------------------------------------------|----------------------------------------------------------------------------------------------------------------------------------------------------------------------------------------------------|--------------------------------|---------------|-------------------------------------------------------------------------------------------------------------------------------------------|
| <b>TÄTIGKEITEN UND EDV-ERFAHRUNG</b>                      |                                                                           |                                                                                                                                                                                                    |                                |               |                                                                                                                                           |
| <b>Tätigkeiten</b>                                        |                                                                           |                                                                                                                                                                                                    |                                |               |                                                                                                                                           |
| <i>Gegenstände</i>                                        | <i>Methoden/Verfahren</i>                                                 | <i>Ziele/Fragen</i>                                                                                                                                                                                | <i>Institutioneller Rahmen</i> | <i>Quelle</i> |                                                                                                                                           |
| überlieferungsgeschichtliche Editionen, hybrid, Editionen | EDV-gestütztes Edieren mit TUSTEP und Collate                             | Hybridpublikation                                                                                                                                                                                  | Editionsprojekt Universität    | \I15-1\       |                                                                                                                                           |
|                                                           | Leithandschriftenprinzip, aber gewisse wortgraphische Vereinheitlichungen |                                                                                                                                                                                                    |                                | \I15-3\       |                                                                                                                                           |
| zwei Apparate im P-Projekt                                | viel mit Apparaten experimentiert                                         |                                                                                                                                                                                                    |                                | \I15-4\       |                                                                                                                                           |
| <b>Erfahrung</b>                                          |                                                                           |                                                                                                                                                                                                    |                                |               |                                                                                                                                           |
|                                                           | <i>Beschreibung</i>                                                       | <i>Bewertung</i>                                                                                                                                                                                   |                                | <i>Quelle</i> |                                                                                                                                           |
|                                                           | TUSTEP, Collate, XML-Editoren                                             | Seit 5 Jahren im Projekt, TUSTEP-Erfahrung hoch, Collate als für die eigenen speziellen Vorhaben als nicht ausreichend identifiziert, XML-Editor nur ansatzweise genutzt zum Öffnen von Dokumenten |                                | \I15-1\       |                                                                                                                                           |
| <b>BEDARFSKATEGORIEN</b>                                  |                                                                           |                                                                                                                                                                                                    |                                |               |                                                                                                                                           |
| <b>K 1</b>                                                |                                                                           |                                                                                                                                                                                                    |                                |               |                                                                                                                                           |
| <b>Bedienbarkeit</b>                                      |                                                                           |                                                                                                                                                                                                    |                                |               |                                                                                                                                           |
| <i>Benennung</i>                                          | <i>Beschreibung</i>                                                       | <i>Bewertung</i>                                                                                                                                                                                   | <i>Bezug</i>                   | <i>Quelle</i> | <i>Reduktion</i>                                                                                                                          |
| vom Interviewer thematisiert, vom Befragten konkretisiert | Bedienung - Bugs und Geschwindigkeit                                      | Bedienung gut, einige Bugs, langsam                                                                                                                                                                | Rezeption/Zugriff              | \I15-5\       | K 1.1d<br>mit mehr EDV-Erfahrung (z.B. mit Eclipse) schnell erlernbar und gut bedienbar<br><br><b>Benutzerführung / Erlernbarkeit und</b> |

# I15 Extraktion

|                                                           |                                 |                                                                                                                                                                                |                         |               |                                                                                                                                                                                                                                                                               |
|-----------------------------------------------------------|---------------------------------|--------------------------------------------------------------------------------------------------------------------------------------------------------------------------------|-------------------------|---------------|-------------------------------------------------------------------------------------------------------------------------------------------------------------------------------------------------------------------------------------------------------------------------------|
|                                                           |                                 |                                                                                                                                                                                |                         |               | <p>K 1.3b<br/>zu instabil, zu viele Programmierfehler, noch nicht einsetzbar</p> <p><b>Systemstabilität, Programmierfehler</b></p>                                                                                                                                            |
| vom Interviewer thematisiert, vom Befragten konkretisiert | Fehlerrückmeldung               | man kam nicht weiter, weiß nicht, was man falsch gemacht hat                                                                                                                   | Produktion/Manipulation | \I15-6\       | <p>K 1.1c<br/>Fehlerrückmeldung / Fehlerkorrektur problematisch, keine Rücksetzfunktion</p> <p><b>Benutzerführung / Erlernbarkeit</b></p>                                                                                                                                     |
| <b>K 2<br/>Rezeption/Zugriff</b>                          |                                 |                                                                                                                                                                                |                         |               |                                                                                                                                                                                                                                                                               |
| <i>Benennung</i>                                          | <i>Beschreibung</i>             | <i>Bewertung</i>                                                                                                                                                               | <i>Bezug</i>            | <i>Quelle</i> | <i>Reduktion</i>                                                                                                                                                                                                                                                              |
| selbst thematisiert                                       | Wörterbuchsuche, Lemmatisierung | markierte Wörter nachschlagen war für uns nicht so interessant, Lemmatisierung schon eher, aber für uns auch nicht sehr brauchbar, man bräuchte sie für das Mittelhochdeutsche | Produktion/Manipulation | \I15-4\       | <p>K 2.1a<br/>kostenloser Zugriff auf unterschiedliche Repositorien bzw. Ressourcen (z.B. Wörterbücher), Quellen und Ausgaben/ Editionen, Vergleichsmöglichkeiten mit anderen Projekten/ Quellen, orts- und rechnerunabhängiger Zugriff</p> <p><b>Zugriff auf Inhalte</b></p> |

## I15 Extraktion

|                                                           |                                                                                                                                                                                                                |                                                                                                                                               |                         |               |                                                                                                                                                                                                                                                                       |
|-----------------------------------------------------------|----------------------------------------------------------------------------------------------------------------------------------------------------------------------------------------------------------------|-----------------------------------------------------------------------------------------------------------------------------------------------|-------------------------|---------------|-----------------------------------------------------------------------------------------------------------------------------------------------------------------------------------------------------------------------------------------------------------------------|
| vom Interviewer thematisiert, vom Befragten konkretisiert | Zugriff auf Wörterbücher                                                                                                                                                                                       | Großartige Sache, braucht man aber nicht unbedingt TextGrid dafür                                                                             |                         | \I15-7\       | K 2.1a<br>kostenloser Zugriff auf unterschiedliche Repositorien bzw. Ressourcen (z.B. Wörterbücher), Quellen und Ausgaben/ Editionen, Vergleichsmöglichkeiten mit anderen Projekten/ Quellen, orts- und rechnerunabhängiger Zugriff<br><br><b>Zugriff auf Inhalte</b> |
| <b>K 3<br/>Produktion/Manipulation</b>                    |                                                                                                                                                                                                                |                                                                                                                                               |                         |               |                                                                                                                                                                                                                                                                       |
| <i>Benennung</i>                                          | <i>Beschreibung</i>                                                                                                                                                                                            | <i>Bewertung</i>                                                                                                                              | <i>Bezug</i>            | <i>Quelle</i> | <i>Reduktion</i>                                                                                                                                                                                                                                                      |
| selbst thematisiert                                       | Funktionen-Angebot in TextGrid                                                                                                                                                                                 | TG ist noch nicht etwas, was uns viel weiterhelfen könnte, bei mehr Funktionen könnte sicher das ein oder andere dabei sein, was wir brauchen | Produktion/Manipulation | \I15-3\       | Arbeitsumgebung mit Tool-Angebot, nicht alles neu /selbst programmieren, kostenlos<br><br><b>Produktionsunterstützung allgemein</b>                                                                                                                                   |
| selbst thematisiert                                       | Normalisierungstool, das Wortformen für die Normalisierung vorschlägt, standardisiert für alle Mitarbeiter, mit Datenbank, die sich im Laufe der Arbeit aufbaut und dokumentiert, welche Entscheidungen bisher | Wäre nützlich, würde die Arbeit einfacher machen                                                                                              |                         | \I15-3\       | Arbeitsumgebung mit Tool-Angebot, nicht alles neu /selbst programmieren, kostenlos<br><br><b>Produktionsunterstützung allgemein</b>                                                                                                                                   |

## I15 Extraktion

|                     |                                                                                                                          |                                                                                                                                                                                                                 |                           |          |                                                                                                                                                                                                                                                                                                                                                |
|---------------------|--------------------------------------------------------------------------------------------------------------------------|-----------------------------------------------------------------------------------------------------------------------------------------------------------------------------------------------------------------|---------------------------|----------|------------------------------------------------------------------------------------------------------------------------------------------------------------------------------------------------------------------------------------------------------------------------------------------------------------------------------------------------|
|                     | getroffen wurden und was neu ist, zusätzlich Kollationsprogramm                                                          |                                                                                                                                                                                                                 |                           |          |                                                                                                                                                                                                                                                                                                                                                |
| selbst thematisiert | Text einfach in die Maske eingießen, Ergebnis wird ausgespuckt, ist aber nicht spezifisch genug                          | Wäre schön, ist aber nicht die Wahrheit                                                                                                                                                                         | Modularität/Anpassbarkeit | \I15-8\  | K 3.1b<br>XML-Auszeichnungs- bzw. Produktionshilfe, Tools zur digitalen Herstellung und Verfügbarmachung von Texten, XML-Schemata vorgefertigt für verschiedene individuelle Bedürfnisse, Konvertierung in XML/TEI, Baseline Encoding, Streaming Editor, Unterstützung bei zunächst geringerer Auszeichnungstiefe<br><br><b>XML-Produktion</b> |
| selbst thematisiert | Zugriff auf Werkzeuge, die auch spezialisiert verwendet werden können                                                    | Inhaltezugriff für uns nicht wichtig, wir haben alle Texte, die wir brauchen, Zugriff auf brauchbare Tools wäre gut, glaube noch nicht daran, dass das wirklich funktioniert, Flexibilität ist extrem schwierig | Modularität/Anpassbarkeit | \I15-11\ | Arbeitsumgebung mit Tool-Angebot, nicht alles neu /selbst programmieren, kostenlos<br><br><b>Produktionsunterstützung allgemein</b>                                                                                                                                                                                                            |
| selbst thematisiert | elektronische Bearbeitung mit Vergleichsprogrammen und Online-Darstellung bietet Überblick über Überlieferung, verbindet | durch DH erzeugter Mehrwert, auch methodisch anregend                                                                                                                                                           |                           | \I15-12\ | K 3.2b<br>Unterschiede durch Textvergleich (Kollationierung, TBLE) visualisieren, Schreiberhände vergleichen,                                                                                                                                                                                                                                  |

## I15 Extraktion

|                                  |                                                                                                                                                                                                                            |                                                                                       |                         |               |                                                                                                                                                                                                                                                             |
|----------------------------------|----------------------------------------------------------------------------------------------------------------------------------------------------------------------------------------------------------------------------|---------------------------------------------------------------------------------------|-------------------------|---------------|-------------------------------------------------------------------------------------------------------------------------------------------------------------------------------------------------------------------------------------------------------------|
|                                  | Vorteile von<br>Rekonstruktion und<br>überlieferungsnahe<br>Edieren, Gruppierung der<br>Überlieferung, Fassungen<br>bündeln, Unterschiede<br>und Nähe von<br>Handschriften,<br>Entwicklungsprozess<br>rekonstruieren,      |                                                                                       |                         |               | Textgenese,<br>Entwicklungsprozess<br>rekonstruieren und<br>darstellen, Schichten und<br>Räumlichkeit darstellen,<br>multiperspektivische<br>Zugang schaffen<br><br><b>Analyse- und<br/>Visualisierungs-<br/>Möglichkeiten</b>                              |
| selbst thematisiert              | SplitsTree, Programm aus<br>der Evolutionsbiologie,<br>Übereinstimmungen im<br>Phänotyp auf Graphen<br>umrechnen, Entfernung<br>graphisch darstellen,<br>Visualisierung, eine Art<br>Variantenrechner auch<br>für TextGrid | positiv, eigene<br>Entwicklung, Mehrwert<br>durch DH, als TG-<br>Funktion interessant |                         | \I15-13\      | K 3.2a<br>Verknüpfung von Tools,<br>kreative Ansätze (z.B.<br>Wörterbücher zur<br>Kollationierung nutzen,<br>Lemmatisierung mit<br>Wörterbüchern verbinden),<br>interdisziplinäre Ansätze<br><br><b>Analyse- und<br/>Visualisierungs-<br/>Möglichkeiten</b> |
| <b>K 4</b>                       |                                                                                                                                                                                                                            |                                                                                       |                         |               |                                                                                                                                                                                                                                                             |
| <b>Modularität/Anpassbarkeit</b> |                                                                                                                                                                                                                            |                                                                                       |                         |               |                                                                                                                                                                                                                                                             |
| <i>Benennung</i>                 | <i>Beschreibung</i>                                                                                                                                                                                                        | <i>Bewertung</i>                                                                      | <i>Bezug</i>            | <i>Quelle</i> | <i>Reduktion</i>                                                                                                                                                                                                                                            |
| selbst thematisiert              | für Collate zu spezielle<br>Anforderungen, deshalb<br>von Hand                                                                                                                                                             |                                                                                       | Produktion/Manipulation | \I15-1\       | K 4.2b<br>Anpassbarkeit von Tools an<br>das jeweilige Projekt / die<br>jeweiligen Gegenstände<br><br><b>Tools und Services</b>                                                                                                                              |

## I15 Extraktion

|                                                |                                                                                                                                                   |                                                                                                                     |                         |               |                                                                                                                          |
|------------------------------------------------|---------------------------------------------------------------------------------------------------------------------------------------------------|---------------------------------------------------------------------------------------------------------------------|-------------------------|---------------|--------------------------------------------------------------------------------------------------------------------------|
| selbst thematisiert                            | Anpassung eines Kollationierungs-Tools an eine spezielle Edition                                                                                  | ohne spezielle Ausrichtung schnell unpraktisch, Anpassbarkeit wäre sehr gut, ist aber bestimmt schwierig umzusetzen | Produktion/Manipulation | \I15-3\       | K 4.2b<br>Anpassbarkeit von Tools an das jeweilige Projekt / die jeweiligen Gegenstände<br><br><b>Tools und Services</b> |
| selbst thematisiert                            | mittelhochdeutsche Lemmatisierung                                                                                                                 | bräuchten wir, ist aber komplexer                                                                                   | Produktion/Manipulation | \I15-4\       | K 4.2b<br>Anpassbarkeit von Tools an das jeweilige Projekt / die jeweiligen Gegenstände<br><br><b>Tools und Services</b> |
| selbst thematisiert                            | Spezialisierung von Collate für zwei Apparate                                                                                                     | gutes Programm, aber nicht speziell genug, da hört es schon auf                                                     | Produktion/Manipulation | \I15-4\       | K 4.2b<br>Anpassbarkeit von Tools an das jeweilige Projekt / die jeweiligen Gegenstände<br><br><b>Tools und Services</b> |
| <b>K 5</b><br><b>Kollaboration/Kooperation</b> |                                                                                                                                                   |                                                                                                                     |                         |               |                                                                                                                          |
| <i>Benennung</i>                               | <i>Beschreibung</i>                                                                                                                               | <i>Bewertung</i>                                                                                                    | <i>Bezug</i>            | <i>Quelle</i> | <i>Reduktion</i>                                                                                                         |
| selbst thematisiert                            | eigene Daten noch nicht in TEI, auch im TG-Workshop noch keinen Mehrwert erkannt, der zum Konvertieren anregt, früher oder später sollte man aber | man kann noch nicht abschätzen, was man brauchen kann, aber generell sinnvolle Sache, unterstützend                 | Produktion/Manipulation | \I15-2\       | K 5.1d<br>Standards, TEI, Unabhängigkeit von Datenformaten<br><br><b>Austausch von Inhalten und Werkzeugen</b>           |
| selbst thematisiert                            | Standards vs. spezialisierte Lösungen, Produktion von Know                                                                                        | das große Problem auch im Hinblick auf Kooperationen                                                                | Produktion/Manipulation | \I15-8\       | K 5.1d<br>Standards, TEI, Unabhängigkeit von                                                                             |

# I15 Extraktion

|                                        |                                                                                                                                                                                                                                                                                                                                                                            |                                                       |                         |          |                                                                                                                                    |
|----------------------------------------|----------------------------------------------------------------------------------------------------------------------------------------------------------------------------------------------------------------------------------------------------------------------------------------------------------------------------------------------------------------------------|-------------------------------------------------------|-------------------------|----------|------------------------------------------------------------------------------------------------------------------------------------|
|                                        | How in unserem Projekt spezifisch, besondere Darstellungsweise, wem es nutzen kann unklar, vielleicht auf altgermanistische Projekte übertragbar, Musterlösungen,                                                                                                                                                                                                          |                                                       |                         |          | Datenformaten<br><br><b>Austausch von Inhalten und Werkzeugen</b>                                                                  |
| selbst thematisiert                    | man möchte die Dinge, solange man daran arbeitet, nicht aus der Hand geben, Bsp. Transkriptionen: Wenn man sie Open Source freigibt arbeitet der Nächste daran mit der Zeit, die man nicht hatte, man will nicht als der, der abtippt in die Geschichte eingehen, sondern aus dem exklusiven Zugang zum Material Ergebnisse erzielen, Online-Ergebnisse nicht so anerkannt | zentrales Problem, wenn auch etwas altmodisch gedacht | Produktion/Manipulation | \I15-9\  | K 5.1b<br>Austausch von Arbeits- bzw. Forschungsergebnissen, Bereitschaft dazu<br><br><b>Austausch von Inhalten und Werkzeugen</b> |
| selbst thematisiert                    | Standards wie TEI als Voraussetzung für Langzeitarchivierung                                                                                                                                                                                                                                                                                                               | Vorteil, positiv                                      | Organisation/Verwaltung | \I15-10\ | K 5.1d<br>Standards, TEI, Unabhängigkeit von Datenformaten<br><br><b>Austausch von Inhalten und Werkzeugen</b>                     |
| <b>K 6<br/>Organisation/Verwaltung</b> |                                                                                                                                                                                                                                                                                                                                                                            |                                                       |                         |          |                                                                                                                                    |

# I15 Extraktion

| <i>Benennung</i>    | <i>Beschreibung</i>                                                                                   | <i>Bewertung</i>                                                                                                                                                                            | <i>Bezug</i> | <i>Quelle</i> | <i>Reduktion</i>                                                                                                                                                                 |
|---------------------|-------------------------------------------------------------------------------------------------------|---------------------------------------------------------------------------------------------------------------------------------------------------------------------------------------------|--------------|---------------|----------------------------------------------------------------------------------------------------------------------------------------------------------------------------------|
| selbst thematisiert | Langzeitarchivierung durch Standards unterstützt                                                      | Vorteil, positiv                                                                                                                                                                            |              | \I15-10\      | K 6.1b<br>Datenspeicherung und -verwaltung, Langzeitarchivierung, verbunden mit Bearbeitungsmöglichkeiten und Nachnutzung<br><br><b>Organisation und Verwaltung von Inhalten</b> |
| selbst thematisiert | multiplizierte Kräfte der Community nutzen, System der Anerkennung von Leistungen überwinden/erneuern | größtes Potential von TG, aber problematisch: strategische Begehrlichkeiten, Angst außen vor zu sein, Problem des Wissenschaftsbetriebes: Anerkennung von Leistungen, gilt es zu überwinden |              | \I15-14\      | K 6.1c<br>Adressierung, Zitierbarkeit, Urheberrecht, Leistungsanerkennung<br><br><b>Organisation und Verwaltung von Inhalten</b>                                                 |
