# Supplementary material
Source: publisher site journal article supplement (https://www.degruyterbrill.com/publication/isbn/9783110463927/downloadAsset/9783110463927_Extraktionen_Reduktionen_fallbezogen.zip)
Supplement: Supplementary file 8 [file I16 Extraktion und Reduktion.pdf › fallbezogene Extraktionen und Reduktionen/I16 Extraktion und Reduktion.pdf]

| <b>TÄTIGKEITEN UND EDV-ERFAHRUNG</b>                                                                                   |                                                                                                                                                                      |                                                                                                        |                                        |               |  |
|------------------------------------------------------------------------------------------------------------------------|----------------------------------------------------------------------------------------------------------------------------------------------------------------------|--------------------------------------------------------------------------------------------------------|----------------------------------------|---------------|--|
| <b>Tätigkeiten</b>                                                                                                     |                                                                                                                                                                      |                                                                                                        |                                        |               |  |
| <i>Gegenstände</i>                                                                                                     | <i>Methoden/Verfahren</i>                                                                                                                                            | <i>Ziele/Fragen</i>                                                                                    | <i>Institutioneller Rahmen</i>         | <i>Quelle</i> |  |
| papierorientierte Editionen, "digital born documents" und künftige Archivaria sowie deren Analyse als Interessengebiet | digital-philologisches Edieren papierorientierter Editionen, Formatierung                                                                                            | gedruckte Edition                                                                                      | Universität                            | \I16-1\       |  |
| <b>Erfahrung</b>                                                                                                       |                                                                                                                                                                      |                                                                                                        |                                        |               |  |
|                                                                                                                        | <i>Beschreibung</i>                                                                                                                                                  | <i>Bewertung</i>                                                                                       |                                        | <i>Quelle</i> |  |
|                                                                                                                        | Latex, Analyse von digital born documents, verschiedene Textverarbeitungsprogramme z.B. OpenOffice, InDesign, TEI , XML-Editoren, Analyse-Tools                      | EDV allgemein hoch, insb. Textverarbeitung, TEI probiert und interessiert, einfache XML-Editor Nutzung | Produktion/Manipulation                | \I16-1\       |  |
|                                                                                                                        | Groupware-Tools, GSD Litwiss basierend auf E-Port, Evaluation von CommSy, OpenSource, Plattform Agora, attachmentbasierte Repositories und Forenstrukturen verknüpft | Vier Jahre Erfahrung                                                                                   | Kollaboration/Kooperatio               | \I16-6\       |  |
|                                                                                                                        | Eclipse                                                                                                                                                              | Vorher nur mal kurz angesehen, evtl. Eclipse im Latext-PlugIn benutzen                                 | Produktion/Manipulation, Bedienbarkeit | \I16-8\       |  |
|                                                                                                                        | Oxygen nie benutzt, kennt aber XML-Editoren und Qualitätsunterschiede                                                                                                | hoch trotz fehlender Oxygen-Kenntnisse                                                                 | Produktion/Manipulation, Bedienbarkeit | \I16-11\      |  |
| <b>BEDARFSKATEGORIEN</b>                                                                                               |                                                                                                                                                                      |                                                                                                        |                                        |               |  |
| <b>K 1</b>                                                                                                             |                                                                                                                                                                      |                                                                                                        |                                        |               |  |
| <b>Bedienbarkeit</b>                                                                                                   |                                                                                                                                                                      |                                                                                                        |                                        |               |  |

# I16 Extraktion

| <i>Benennung</i>                            | <i>Beschreibung</i>                                                                                                                                                                       | <i>Bewertung</i>                                                           | <i>Bezug</i>                               | <i>Quelle</i> | <i>Reduktion</i>                                                                                                                                                                                                                                                                      |
|---------------------------------------------|-------------------------------------------------------------------------------------------------------------------------------------------------------------------------------------------|----------------------------------------------------------------------------|--------------------------------------------|---------------|---------------------------------------------------------------------------------------------------------------------------------------------------------------------------------------------------------------------------------------------------------------------------------------|
| selbst thematisiert                         | Projektmetapher bzw. -struktur, von Eclipse geerbt wie einiges, weitere Visualisierungsebenen nötig, vielleicht gewohnte Ordnerstruktur besser, oder etwas, das wie eine Website aussieht | tolle Ansätze, aber man muss sich erst daran gewöhnen, verbesserungswürdig | Organisation/Verwaltung, Rezeption/Zugriff | \I16-8\       | K 1.2c<br>Zurechtfinden, Komponenten und Sichten zuordnen ist am Anfang schwierig (evtl. gewohnte Website- und Ordnerstrukturierung besser)<br><br><b>Orientierung / Übersichtlichkeit / Oberflächen-gestaltung</b>                                                                   |
| selbst thematisiert                         | menügeführtes Hilfesystem, wo man Tags sehr einfach wiederfinden kann, Autovervollständigen z.B.                                                                                          | Wäre hilfreich                                                             | Produktion/Manipulation                    | \I16-11\      | K 1.4a<br>XML/TEI ist eine Hürde, Unterstützung durch das System ist notwendig, Heranführen/ Hilfemenu, Reduzierung der Schwelle, aber keine Vermeidung von spitzen Klammern, Komplexität abbilden, fachliche Mehrwerte vermitteln<br><br><b>Bedienbarkeit der Auszeichnungsebene</b> |
| vom Interviewer thematisiert, vom Befragten | Hänger durch Betastatus, Serververbindung                                                                                                                                                 | auf Betastatus zurückgeführt, zu                                           |                                            | \I16-16\      | K 1.1e<br>anfangs steile                                                                                                                                                                                                                                                              |

# I16 Extraktion

|                                  |                                                                      |                                                                                                                        |                         |               |                                                                                                                                                                                                                                                                                                                                                                                                                            |
|----------------------------------|----------------------------------------------------------------------|------------------------------------------------------------------------------------------------------------------------|-------------------------|---------------|----------------------------------------------------------------------------------------------------------------------------------------------------------------------------------------------------------------------------------------------------------------------------------------------------------------------------------------------------------------------------------------------------------------------------|
| konkretisiert                    | unterbrochen, Bedienstruktur und Begrifflichkeiten, Rollenverteilung | menülastig, Eclipsekonzept gewöhnungsbedürftig, z.B. Rollenverteilung noch etwas "von hinten durch die Brust ins Auge" |                         |               | <p>Lernkurve, Einarbeitung notwendig, danach gut (z.B. bzgl. unterschiedlicher Navigations- und Bedienungs-möglichkeiten für dasselbe Ziel, menülastig)</p> <p><b>Benutzerführung / Erlernbarkeit</b></p> <p>K 1.3a<br/>Kinderkrankheiten sind normal, ist noch in der Entwicklung und<br/>K 1.3b<br/>zu unstabil, zu viele Programmierfehler, noch nicht einsetzbar</p> <p><b>Systemstabilität, Programmierfehler</b></p> |
| <b>K 2<br/>Rezeption/Zugriff</b> |                                                                      |                                                                                                                        |                         |               |                                                                                                                                                                                                                                                                                                                                                                                                                            |
| <i>Benennung</i>                 | <i>Beschreibung</i>                                                  | <i>Bewertung</i>                                                                                                       | <i>Bezug</i>            | <i>Quelle</i> | <i>Reduktion</i>                                                                                                                                                                                                                                                                                                                                                                                                           |
| selbst thematisiert              | Was kann man dem Leser durch TEI-Code zeigen, Rezeptionsmöglichkeit  | fraglich, Problematik, "alles im Fluss"                                                                                | Produktion/Manipulation | I16-2\        | <p>K 2.2a<br/>Spezifizierbarkeit des Zugriffs, fachspezifische Zugriffsmöglichkeiten,</p>                                                                                                                                                                                                                                                                                                                                  |

## I16 Extraktion

|                     |                                               |                  |                           |          |                                                                                                                                                                                                                                                                           |
|---------------------|-----------------------------------------------|------------------|---------------------------|----------|---------------------------------------------------------------------------------------------------------------------------------------------------------------------------------------------------------------------------------------------------------------------------|
|                     |                                               |                  |                           |          | <p>verschiedene Zugriffsperspektiven durch Auszeichnungen und Präsentationsformen (z.B. parallele Ansicht von Faksimile und Transkription im TBLE)</p> <p><b>Zugriffsformen, Rezeptions- und Recherche-möglichkeiten</b></p>                                              |
| selbst thematisiert | freie Zugänglichkeit von immensen Datenmengen | Mehrwert         | Kollaboration/Kooperation | \I16-14\ | <p>K 2.1a kostenloser Zugriff auf unterschiedliche Repositorien bzw. Ressourcen (z.B. Wörterbücher), Quellen und Ausgaben/ Editionen, Vergleichsmöglichkeiten mit anderen Projekten/ Quellen, orts- und rechnerunabhängiger Zugriff</p> <p><b>Zugriff auf Inhalte</b></p> |
| selbst thematisiert | frei zugängliche, frei vernetzbare Editionen  | größter Mehrwert | Kollaboration/Kooperation | \I16-20\ | <p>K 2.1c nicht rein rezeptiver, sondern auch produktiver,</p>                                                                                                                                                                                                            |

|                                              |                                                                                                                                 |                                                                                                                                                                     |                         |               |                                                                                                                                                                                                                                                                                                         |
|----------------------------------------------|---------------------------------------------------------------------------------------------------------------------------------|---------------------------------------------------------------------------------------------------------------------------------------------------------------------|-------------------------|---------------|---------------------------------------------------------------------------------------------------------------------------------------------------------------------------------------------------------------------------------------------------------------------------------------------------------|
|                                              |                                                                                                                                 |                                                                                                                                                                     |                         |               | „schreibender“ Zugriff, auch in der eigenen Forschungsumgebung, auch auf den Quellcode<br><br><b>Zugriff auf Inhalte</b>                                                                                                                                                                                |
| selbst thematisiert                          | zwischen verschiedenen Views auf einen Text und seine Bestandteile und Tags hin und herschalten                                 | Wichtig, wird philologische Diskussionen ergeben, wenn es sichtbar wird, trotzdem letztlich Möglichkeiten, um fast alle Gemüter zu befriedigen - bis auf herrn Reuß | Produktion/Manipulation | \I16-20\      | K 2.2a<br>Spezifizierbarkeit des Zugriffs, fachspezifische Zugriffsmöglichkeiten, verschiedene Zugriffsperspektiven durch Auszeichnungen und Präsentationsformen (z.B. parallele Ansicht von Faksimile und Transkription im TBLE)<br><br><b>Zugriffsformen, Rezeptions- und Recherche-möglichkeiten</b> |
| <b>K 3</b><br><b>Produktion/Manipulation</b> |                                                                                                                                 |                                                                                                                                                                     |                         |               |                                                                                                                                                                                                                                                                                                         |
| <i>Benennung</i>                             | <i>Beschreibung</i>                                                                                                             | <i>Bewertung</i>                                                                                                                                                    | <i>Bezug</i>            | <i>Quelle</i> | <i>Reduktion</i>                                                                                                                                                                                                                                                                                        |
| selbst thematisiert                          | TextGrid-Lab als mächtiges Eingabe-Tool, Reihe von geplanten Komponenten, mehr als ein XML-Editor, größerer Arbeitszusammenhang | beeindruckend                                                                                                                                                       |                         | \I16-3\       | K 3.4a<br>Arbeitsumgebung mit Tool-Angebot, nicht alles neu /selbst programmieren, kostenlos                                                                                                                                                                                                            |

|                     |                                                                                                                                                                                                                                    |                                                                      |                                  |          |                                                                                                                                                                                                                                                                                                                                                |
|---------------------|------------------------------------------------------------------------------------------------------------------------------------------------------------------------------------------------------------------------------------|----------------------------------------------------------------------|----------------------------------|----------|------------------------------------------------------------------------------------------------------------------------------------------------------------------------------------------------------------------------------------------------------------------------------------------------------------------------------------------------|
|                     |                                                                                                                                                                                                                                    |                                                                      |                                  |          | <b>Produktions-<br/>unterstützung<br/>allgemein</b>                                                                                                                                                                                                                                                                                            |
| selbst thematisiert | What-you-see-is-what-you-mean-Editor-Komponente, Splitscreen TEI und Klartext mit kommentierten Stellen und Varianten, Komponente, in die man schreibend eingreifen kann                                                           | Wunsch, auch im Hinblick auf pragmatischere und betagtere Philologen | Rezeption/Zugriff, Bedienbarkeit | \I16-9\  | K 3.1b<br>XML-Auszeichnungs- bzw. Produktionshilfe, Tools zur digitalen Herstellung und Verfügbarmachung von Texten, XML-Schemata vorgefertigt für verschiedene individuelle Bedürfnisse, Konvertierung in XML/TEI, Baseline Encoding, Streaming Editor, Unterstützung bei zunächst geringerer Auszeichnungstiefe<br><br><b>XML-Produktion</b> |
| selbst thematisiert | TEI-Subset für textgenetische Auszeichnung, relationale Auszeichnungssemantik, Masse von Daten aufeinander beziehen, Möglichkeit der Errechnung einer textgenetischen Repräsentation, die über das hinausgeht, was man kodiert hat | echter Mehrwert                                                      |                                  | \I16-10\ | K 3.2b<br>Unterschiede durch Textvergleich (Kollationierung, TBLE) visualisieren, Schreiberhände vergleichen, Textgenese, Entwicklungsprozess rekonstruieren und                                                                                                                                                                               |

## I16 Extraktion

|                     |                                                                                                                                                                                                               |                                                                           |                           |          |                                                                                                                                                                                                                                                                                                                             |
|---------------------|---------------------------------------------------------------------------------------------------------------------------------------------------------------------------------------------------------------|---------------------------------------------------------------------------|---------------------------|----------|-----------------------------------------------------------------------------------------------------------------------------------------------------------------------------------------------------------------------------------------------------------------------------------------------------------------------------|
|                     |                                                                                                                                                                                                               |                                                                           |                           |          | <p>darstellen, Schichten und Räumlichkeit darstellen, multiperspektivische Zugang schaffen</p> <p><b>Analyse- und Visualisierungsmöglichkeiten</b></p>                                                                                                                                                                      |
| selbst thematisiert | zur Errechnung einer Textgenese-Repräsentation statt eines XSLT-Prozessors einen Compiler drüberlaufen lassen, Sekundärnutzung eines kollaborativ erarbeiteten Editionstextes, halbautomatisierte Nachnutzung | Wäre eine Idee für neue wissenschaftliche Erkenntnisse                    |                           | \I16-12\ | <p>K 3.2b</p> <p>Unterschiede durch Textvergleich (Kollationierung, TBLE) visualisieren, Schreiberhände vergleichen, Textgenese, Entwicklungsprozess rekonstruieren und darstellen, Schichten und Räumlichkeit darstellen, multiperspektivische Zugang schaffen</p> <p><b>Analyse- und Visualisierungsmöglichkeiten</b></p> |
| selbst thematisiert | Lemmatisierungstool, Entwicklung zu mächtigerem Tool möglich, z.B. Kommentierung, gemeinsame Nutzung an                                                                                                       | schon ein Anfang, aber etwas einsam, Weiterentwicklung wäre wünschenswert | Kollaboration/Kooperation | \I16-13\ | <p>K 3.3c</p> <p>kollaborative Kommentierungen durch Nutzer, Agenda/Korrigenda,</p>                                                                                                                                                                                                                                         |

# I16 Extraktion

|                                                |                                                                   |                                                  |                   |               |                                                                                                                                                                          |
|------------------------------------------------|-------------------------------------------------------------------|--------------------------------------------------|-------------------|---------------|--------------------------------------------------------------------------------------------------------------------------------------------------------------------------|
|                                                | Texten                                                            |                                                  |                   |               | Notepad<br><br><b>Analyse- und Visualisierungsmöglichkeiten</b>                                                                                                          |
| selbst thematisiert                            | graphischer Link-Editor                                           | Wichtig, gefreut, überrascht, dass es soweit ist |                   | \I16-19\      | K 3.3d<br>Verknüpfungsmöglichkeiten Text-Bild, Transkriptions-/Faksimile-Ansicht<br><br><b>Analyse- und Visualisierungsmöglichkeiten</b>                                 |
| selbst thematisiert                            | Visualisierung von Daten, TEI-Browser als Standard-Implementation | längerfristig wichtig, Mehrwert                  | Rezeption/Zugriff | \I16-20\      | K 3.2c<br>Visualisierung von Auszeichnungen, Worthäufigkeiten, Kollokationen, Themaerschließung, Mustererkennung<br><br><b>Analyse- und Visualisierungsmöglichkeiten</b> |
| <b>K 4</b><br><b>Modularität/Anpassbarkeit</b> |                                                                   |                                                  |                   |               |                                                                                                                                                                          |
| <i>Benennung</i>                               | <i>Beschreibung</i>                                               | <i>Bewertung</i>                                 | <i>Bezug</i>      | <i>Quelle</i> | <i>Reduktion</i>                                                                                                                                                         |
| ---                                            | ---                                                               | ---                                              | ---               | ---           | ---                                                                                                                                                                      |
| <b>K 5</b><br><b>Kollaboration/Kooperation</b> |                                                                   |                                                  |                   |               |                                                                                                                                                                          |
| <i>Benennung</i>                               | <i>Beschreibung</i>                                               | <i>Bewertung</i>                                 | <i>Bezug</i>      | <i>Quelle</i> | <i>Reduktion</i>                                                                                                                                                         |



## I16 Extraktion

|                     |                                                                                                                                                                                                                                                                                                                              |                                                |                         |          |                                                                                                                                                                                          |
|---------------------|------------------------------------------------------------------------------------------------------------------------------------------------------------------------------------------------------------------------------------------------------------------------------------------------------------------------------|------------------------------------------------|-------------------------|----------|------------------------------------------------------------------------------------------------------------------------------------------------------------------------------------------|
| selbst thematisiert | Workflow-Tools, Koordination von Zusammenarbeit an einer gemeinsamen Datenbasis                                                                                                                                                                                                                                              | spannend                                       | Produktion/Manipulation | \I16-3\  | K 5.2a<br>Zusammenarbeit in Teams von verschiedenen Orten aus, auch an einem Dokument, verteilte Bearbeitung verschiedener ‚Schichten‘ eines Dokuments usw.<br><br><b>Zusammenarbeit</b> |
| selbst thematisiert | Tool, das serverseitig funktioniert, das ermöglicht, zu definieren, welche Mitarbeiter in welcher Reihenfolge bestimmte Aufgaben und Aktionsschritte zugewiesen bekommen, automatisierbarer Prozess, Parallelzugriffe schalten, Zugriffskontrolle, Begrenzung der Selbstausschüttungsbedürfnisse von Geisteswissenschaftlern | Würde ich als Projektkoordinator sehr schätzen | Produktion/Manipulation | \I16-5\  | K 5.2a<br>Zusammenarbeit in Teams von verschiedenen Orten aus, auch an einem Dokument, verteilte Bearbeitung verschiedener ‚Schichten‘ eines Dokuments usw.<br><br><b>Zusammenarbeit</b> |
| selbst thematisiert | Spezialisten können an einem Text zusammenarbeiten, die sonst höchsten über Skype mal sich treffen würden                                                                                                                                                                                                                    | selbstverständlich Mehrwert                    | Produktion/Manipulation | \I16-14\ | K 5.2a<br>Zusammenarbeit in Teams von verschiedenen Orten aus, auch an einem Dokument, verteilte Bearbeitung verschiedener ‚Schichten‘ eines                                             |

|                                        |                                                                                                                                                             |                                         |                         |               |                                                                                                                                                                                      |
|----------------------------------------|-------------------------------------------------------------------------------------------------------------------------------------------------------------|-----------------------------------------|-------------------------|---------------|--------------------------------------------------------------------------------------------------------------------------------------------------------------------------------------|
|                                        |                                                                                                                                                             |                                         |                         |               | Dokuments usw.<br><b>Zusammenarbeit</b>                                                                                                                                              |
| selbst thematisiert                    | die kollaborative Bearbeitung von strukturiert digital zu erarbeitenden Editionen                                                                           | größter Mehrwert                        | Produktion/Manipulation | \I16-20\      | K 5.2a<br>Zusammenarbeit in Teams von verschiedenen Orten aus, auch an einem Dokument, verteilte Bearbeitung verschiedener ‚Schichten‘ eines Dokuments usw.<br><b>Zusammenarbeit</b> |
| <b>K 6<br/>Organisation/Verwaltung</b> |                                                                                                                                                             |                                         |                         |               |                                                                                                                                                                                      |
| <i>Benennung</i>                       | <i>Beschreibung</i>                                                                                                                                         | <i>Bewertung</i>                        | <i>Bezug</i>            | <i>Quelle</i> | <i>Reduktion</i>                                                                                                                                                                     |
| selbst thematisiert                    | Plattform, Verkörperung einer Arbeitsumgebung, Workflow vom vorliegenden Archivarium über das Eingeben, Kollationieren bis zur Repräsentation am Bildschirm | gespannt, wie weit das ist, interessant | Produktion/Manipulation | \I16-2\       | K 6.2a<br>Workflow-Organisation, Projekt-Verwaltung<br><b>Organisation und Verwaltung von Arbeitsprozessen</b>                                                                       |
| selbst thematisiert                    | Verortung der Grenze zwischen TextGrid-Lab und der serverseitigen Implementation, Wo gehen gespeicherte Texte hin? Wo sitzen die Tools?                     | unklar, schwierig                       |                         | \I16-4\       | K 6.1b<br>Datenspeicherung und –verwaltung, Langzeitarchivierung, verbunden mit Bearbeitungs-                                                                                        |

|                                                           |                                                                                                                                                                                                                                                                                                                        |                                                                                                                                                                                                  |                                                    |          |                                                                                                 |
|-----------------------------------------------------------|------------------------------------------------------------------------------------------------------------------------------------------------------------------------------------------------------------------------------------------------------------------------------------------------------------------------|--------------------------------------------------------------------------------------------------------------------------------------------------------------------------------------------------|----------------------------------------------------|----------|-------------------------------------------------------------------------------------------------|
|                                                           |                                                                                                                                                                                                                                                                                                                        |                                                                                                                                                                                                  |                                                    |          | möglichkeiten und<br>Nachnutzung<br><br><b>Organisation und<br/>Verwaltung von<br/>Inhalten</b> |
| selbst thematisiert                                       | Versionierung in Groupware-Tools, attachmentbasierte Repositories und Forenstrukturen verknüpft                                                                                                                                                                                                                        | Versionierung schwierig zu repräsentieren, andererseits für TextGrid wünschenswerte Funktionen des Kommentierens der Textbearbeitung bzw. forenartige Strukturen, die nachverfolgt werden können | Produktion/Manipulation, Kollaboration/Kooperation | \I16-6\  | K 6.1a<br>Versionenverwaltung<br><br><b>Organisation und<br/>Verwaltung von<br/>Inhalten</b>    |
| vom Interviewer thematisiert, vom Befragten konkretisiert | zentrale Problemaspekte der Versionierung: Wann wird eine Version als solche erkannt und abgespeichert, Wo wird sie hinterlegt? Für wen bleibt sie zugänglich? Wie wird mit parallelen, synchronen Edits verfahren? Wenn mehrere an derselben Textstelle arbeiten? eher Sperralgorithmus als Merging, Versionenbrowser | zentrale Problemaspekte, ideal wäre, wenn jeder Edit gespeichert werden könnte und per Versionenbrowser darauf zugegriffen werden könnte                                                         | Kollaboration/Kooperation, Produktion/Manipulation | \I16-7\  | K 6.1a<br>Versionenverwaltung<br><br><b>Organisation und<br/>Verwaltung von<br/>Inhalten</b>    |
| vom Interviewer thematisiert, vom Befragten konkretisiert | Koordinierung großer Arbeitsgruppen, Arbeiten an großen Textkorpora, Workflow-Management                                                                                                                                                                                                                               | Mehrwert                                                                                                                                                                                         | Kollaboration/Kooperation, Produktion/Manipulation | \I16-15\ | K 6.2a<br>Workflow-Organisation, Projekt-Verwaltung                                             |

# I16 Extraktion

|                     |                      |                    |                                                       |          |                                                                                                                                    |
|---------------------|----------------------|--------------------|-------------------------------------------------------|----------|------------------------------------------------------------------------------------------------------------------------------------|
|                     |                      |                    |                                                       |          | <b>Organisation und<br/>Verwaltung von<br/>Arbeitsprozessen</b>                                                                    |
| selbst thematisiert | Workflow-Editor-Tool | Wahnsinnig wichtig | Produktion/Manipulation,<br>Kollaboration/Kooperation | \I16-18\ | K 6.2a<br>Workflow-<br>Organisation, Projekt-<br>Verwaltung<br><br><b>Organisation und<br/>Verwaltung von<br/>Arbeitsprozessen</b> |
