# Supplementary material
Source: publisher site journal article supplement (https://www.degruyterbrill.com/publication/isbn/9783110463927/downloadAsset/9783110463927_Extraktionen_Reduktionen_fallbezogen.zip)
Supplement: Supplementary file 9 [file I17 Extraktion und Reduktion.pdf › fallbezogene Extraktionen und Reduktionen/I17 Extraktion und Reduktion.pdf]

| <b>TÄTIGKEITEN UND EDV-ERFAHRUNG</b> |                                                                                                                                                                                                  |                                                                           |                                                                                  |               |                                                                                                                                                                                       |
|--------------------------------------|--------------------------------------------------------------------------------------------------------------------------------------------------------------------------------------------------|---------------------------------------------------------------------------|----------------------------------------------------------------------------------|---------------|---------------------------------------------------------------------------------------------------------------------------------------------------------------------------------------|
| <b>Tätigkeiten</b>                   |                                                                                                                                                                                                  |                                                                           |                                                                                  |               |                                                                                                                                                                                       |
| <i>Gegenstände</i>                   | <i>Methoden/Verfahren</i>                                                                                                                                                                        | <i>Ziele/Fragen</i>                                                       | <i>Institutioneller Rahmen</i>                                                   | <i>Quelle</i> |                                                                                                                                                                                       |
| Edition                              | bisher normale Editor-Arbeit, jetzt erstmal elektronische Edition, elektronische Bearbeitung, edv-gestützt                                                                                       | elektronische Publikation                                                 | Editionsprojekt, Kooperation Universitäten / gemeinnützige Forschungsinstitution | \I17-1\       |                                                                                                                                                                                       |
| <b>Erfahrung</b>                     |                                                                                                                                                                                                  |                                                                           |                                                                                  |               |                                                                                                                                                                                       |
|                                      | <i>Beschreibung</i>                                                                                                                                                                              | <i>Bewertung</i>                                                          |                                                                                  | <i>Quelle</i> |                                                                                                                                                                                       |
|                                      | erstmal elektronische Edition, Bearbeitung und Publikation, im Graduiertenkolleg vorher andere elektronische Projekte kennengelernt, HTML und XML bekannt, aber nicht durch praktische Anwendung | etwas theoretische Vorerfahrung, wenig praktische Erfahrung, Einarbeitung |                                                                                  | \I17-1\       |                                                                                                                                                                                       |
| <b>BEDARFSKATEGORIEN</b>             |                                                                                                                                                                                                  |                                                                           |                                                                                  |               |                                                                                                                                                                                       |
| <b>K 1 Bedienbarkeit</b>             |                                                                                                                                                                                                  |                                                                           |                                                                                  |               |                                                                                                                                                                                       |
| <i>Benennung</i>                     | <i>Beschreibung</i>                                                                                                                                                                              | <i>Bewertung</i>                                                          | <i>Bezug</i>                                                                     | <i>Quelle</i> | <i>Reduktion</i>                                                                                                                                                                      |
| vom Interviewer thematisiert         | einmal ein Bedienproblem mit dem Nachbar geklärt                                                                                                                                                 | Erläuterung nicht mitbekommen, nicht auf TG zurückgeführt                 |                                                                                  | \I17-10\      | K 1.1h schwer zu beurteilen, weil im Workshop geführt bzw. nur an einem Bsp. gearbeitet wurde, zu wenig Zeit war, Tool nicht fertig war<br><br><b>Benutzerführung / Erlernbarkeit</b> |



# I17 Extraktion

|                                        |                                                                                                                                                          |                                                                                               |                         |               |                                                                                                                                                                                                                                                                       |
|----------------------------------------|----------------------------------------------------------------------------------------------------------------------------------------------------------|-----------------------------------------------------------------------------------------------|-------------------------|---------------|-----------------------------------------------------------------------------------------------------------------------------------------------------------------------------------------------------------------------------------------------------------------------|
| selbst thematisiert                    | einiges ist noch nicht so weit                                                                                                                           | zeitliches Problem, noch nicht zu beurteilen, es wäre sehr schädlich, wenn nichts daraus wird |                         | \I17-14\      | K 1.3a<br>Kinderkrankheiten sind normal, ist noch in der Entwicklung<br><br><b>Systemstabilität, Programmierfehler</b>                                                                                                                                                |
| <b>K 2<br/>Rezeption/Zugriff</b>       |                                                                                                                                                          |                                                                                               |                         |               |                                                                                                                                                                                                                                                                       |
| <i>Benennung</i>                       | <i>Beschreibung</i>                                                                                                                                      | <i>Bewertung</i>                                                                              | <i>Bezug</i>            | <i>Quelle</i> | <i>Reduktion</i>                                                                                                                                                                                                                                                      |
| selbst thematisiert                    | Einbindungen im großen Stil, nicht nur Wörterbuchzugriff, Literaturverweise, stabile Adressierung, auch von Links zu Aufsätzen, Aspekt der Aktualhaltung | Wichtig                                                                                       | Produktion/Manipulation | \I17-12\      | K 2.1a<br>kostenloser Zugriff auf unterschiedliche Repositorien bzw. Ressourcen (z.B. Wörterbücher), Quellen und Ausgaben/ Editionen, Vergleichsmöglichkeiten mit anderen Projekten/ Quellen, orts- und rechnerunabhängiger Zugriff<br><br><b>Zugriff auf Inhalte</b> |
| <b>K 3<br/>Produktion/Manipulation</b> |                                                                                                                                                          |                                                                                               |                         |               |                                                                                                                                                                                                                                                                       |
| <i>Benennung</i>                       | <i>Beschreibung</i>                                                                                                                                      | <i>Bewertung</i>                                                                              | <i>Bezug</i>            | <i>Quelle</i> | <i>Reduktion</i>                                                                                                                                                                                                                                                      |
| selbst thematisiert                    | TG als XML-Editor präsentiert, weniger die Interaktion von Komponenten wie in der                                                                        | für mich nicht so schlimm, weil ich Anfänger bin, hätte gerne die                             |                         | \I17-2\       | K 3.2a<br>Verknüpfung von Tools, kreative Ansätze (z.B. Wörterbücher zur                                                                                                                                                                                              |



## I17 Extraktion

|                     |                                                                                        |                                                                                                                        |                   |         |                                                                                                                                                                                                                                                                                                        |
|---------------------|----------------------------------------------------------------------------------------|------------------------------------------------------------------------------------------------------------------------|-------------------|---------|--------------------------------------------------------------------------------------------------------------------------------------------------------------------------------------------------------------------------------------------------------------------------------------------------------|
|                     | Projektbeschreibung, Zugriff auf weitere Funktionen                                    | Möglichkeiten vorgestellt bekomme, noch nicht weit entwickelt, eigentlich zu wenig als Workshop mit nur einem Beispiel |                   |         | <p>Kollationierung nutzen, Lemmatisierung mit Wörterbüchern verbinden), interdisziplinäre Ansätze</p> <p><b>Analyse- und Visualisierungs</b></p> <p>K 3.4a<br/>Arbeitsumgebung mit Tool-Angebot, nicht alles neu /selbst programmieren, kostenlos</p> <p><b>Produktionsunterstützung allgemein</b></p> |
| selbst thematisiert | gescante Handschriften am Bildschirm transkribieren, weiterbearbeiten und präsentieren | Wunsch, damit würden wir arbeiten                                                                                      | Rezeption/Zugriff | \I17-3\ | <p>K 3.3d<br/>Verknüpfungsmöglichkeiten Text-Bild, Transkriptions-/Faksimile-Ansicht</p> <p><b>Verknüpfungsmöglichkeiten und deren Visualisierung</b></p>                                                                                                                                              |
| selbst thematisiert | Text-Bild-Link-Editor, graphischer Link-Editor                                         | das könnte ich brauchen zum Arbeiten, darauf habe ich gehofft                                                          |                   | \I17-3\ | <p>K 3.3d<br/>Verknüpfungsmöglichkeiten Text-Bild, Transkriptions-/Faksimile-Ansicht</p>                                                                                                                                                                                                               |



# I17 Extraktion

|                     |                                                                                                                                                                                                                                                                                                                                                                                                                              |                     |                   |         |                                                                                                                                                                                                                                                                                                                                                                            |
|---------------------|------------------------------------------------------------------------------------------------------------------------------------------------------------------------------------------------------------------------------------------------------------------------------------------------------------------------------------------------------------------------------------------------------------------------------|---------------------|-------------------|---------|----------------------------------------------------------------------------------------------------------------------------------------------------------------------------------------------------------------------------------------------------------------------------------------------------------------------------------------------------------------------------|
|                     |                                                                                                                                                                                                                                                                                                                                                                                                                              |                     |                   |         | <b>Verknüpfungs-<br/>möglichkeiten und<br/>deren Visualisierung</b>                                                                                                                                                                                                                                                                                                        |
| selbst thematisiert | primär die XML-Editor-<br>Funktion präsentiert                                                                                                                                                                                                                                                                                                                                                                               |                     |                   | \I17-4\ | K 3.4a<br>Arbeitsumgebung mit<br>Tool-Angebot, nicht alles<br>neu /selbst<br>programmieren,<br>kostenlos<br><br><b>Produktions-<br/>unterstützung<br/>allgemein</b>                                                                                                                                                                                                        |
| selbst thematisiert | komplexes Werkprojekt,<br>verschiedene Fassungen, als<br>Kontinuum behandeln mit<br>verschiedenen Stufen,<br>Differenzierungssystem,<br>Bezüge zwischen<br>verschiedenen Stadien<br>setzen, komplexe Verweise,<br>nicht bloße Textreferenzen,<br>Semantic-Web-Vorstellung,<br>Bsp. Entwurf, Notizenplan -<br>Werk verknüpfen/<br>Formulierung des<br>semantischen Kerns --><br>Ausarbeitung, Hilfe von<br>Informatiker-Seite | Das hätte ich gerne | Rezeption/Zugriff | \I17-5\ | K 3.2b<br>Unterschiede durch<br>Textvergleich<br>(Kollationierung, TBLE)<br>visualisieren,<br>Schreiberhände<br>vergleichen, Textgenese,<br>Entwicklungsprozess<br>rekonstruieren und<br>darstellen, Schichten und<br>Räumlichkeit darstellen,<br>multiperspektivischen<br>Zugang schaffen<br><br><b>Analyse- und<br/>Visualisierungs-<br/>möglichkeiten</b><br><br>K 3.3a |



## I17 Extraktion

|                     |                                                                                                                                                          |                                                      |                         |          |                                                                                                                                                                                                                                               |
|---------------------|----------------------------------------------------------------------------------------------------------------------------------------------------------|------------------------------------------------------|-------------------------|----------|-----------------------------------------------------------------------------------------------------------------------------------------------------------------------------------------------------------------------------------------------|
|                     |                                                                                                                                                          |                                                      |                         |          | <p>Verknüpfungsmöglichkeiten Text-Text (z.B. editionswiss. Kommentarfunktionen, Varianten verknüpfen, Apparat, Quellen/Referenzen, Register, Wörterbücher, Briefe)</p> <p><b>K 3.3 Verknüpfungsmöglichkeiten und deren Visualisierung</b></p> |
| selbst thematisiert | Workshop-Schwerpunkt XML-Editor vs. Präsentation der in der Entwicklung befindlichen Funktionen                                                          | das in der Entwicklung befindliche ist interessanter |                         | \I17-11\ | <p>K 3.4a Arbeitsumgebung mit Tool-Angebot, nicht alles neu /selbst programmieren, kostenlos</p> <p><b>Produktionsunterstützung allgemein</b></p>                                                                                             |
| selbst thematisiert | Einbindungen im großen Stil, nicht nur Wörterbuchzugriff, Literaturverweise, stabile Adressierung, auch von Links zu Aufsätzen, Aspekt der Aktualhaltung | Wichtig                                              | Produktion/Manipulation | \I17-12\ | <p>K 3.3a Verknüpfungsmöglichkeiten Text-Text (z.B. editionswiss. Kommentarfunktionen, Varianten verknüpfen, Apparat, Quellen/Referenzen, Register, Wörterbücher,</p>                                                                         |



|                                          |                                                                                                                                                                                                                                  |                                                               |                                            |               |                                                                                                                                                               |
|------------------------------------------|----------------------------------------------------------------------------------------------------------------------------------------------------------------------------------------------------------------------------------|---------------------------------------------------------------|--------------------------------------------|---------------|---------------------------------------------------------------------------------------------------------------------------------------------------------------|
|                                          |                                                                                                                                                                                                                                  |                                                               |                                            |               | Briefe)<br><br><b>Verknüpfungs-<br/>möglichkeiten und<br/>deren Visualisierung</b>                                                                            |
| <b>K 4<br/>Modularität/Anpassbarkeit</b> |                                                                                                                                                                                                                                  |                                                               |                                            |               |                                                                                                                                                               |
| <i>Benennung</i>                         | <i>Beschreibung</i>                                                                                                                                                                                                              | <i>Bewertung</i>                                              | <i>Bezug</i>                               | <i>Quelle</i> | <i>Reduktion</i>                                                                                                                                              |
| selbst thematisiert                      | Kombination und Integration verschiedener Tools                                                                                                                                                                                  | größter Fortschritt                                           | Rezeption/Zugriff, Produktion/Manipulation | \I17-13\      | K 4.2a<br>Anschließbarkeit und Kombinierbarkeit von Tools und Services, auch von selbstentwickelten – modulares Konzept<br><br><b>Tools und Services</b>      |
| <b>K 5<br/>Kollaboration/Kooperation</b> |                                                                                                                                                                                                                                  |                                                               |                                            |               |                                                                                                                                                               |
| <i>Benennung</i>                         | <i>Beschreibung</i>                                                                                                                                                                                                              | <i>Bewertung</i>                                              | <i>Bezug</i>                               | <i>Quelle</i> | <i>Reduktion</i>                                                                                                                                              |
| selbst thematisiert                      | Aus der Informatik davon lernen, wie solche komplexen Verknüpfungen technisch beschrieben werden, um sie besser artikulieren zu können, auf den Punkt bringen, wo Geisteswissenschaftler sich mit ein paar Worten darüber retten | interessiert mich noch mehr als die Technik selbst            | Produktion/Manipulation                    | \I17-6\       | K 5.2b<br>Zusammenarbeit zwischen Institutionen, Projekten, auch intern zwischen verschiedenen Stellen, mit Technikern, Workflow<br><br><b>Zusammenarbeit</b> |
| selbst thematisiert                      | davon lernen, wie andere Leute denken, mit eigenen Ansprüchen zu beiderseitigem Nutzen                                                                                                                                           | Fortschritt, Erkenntnisse, kann man nicht hoch genug schätzen | Produktion/Manipulation                    | \I17-7\       | K 5.2b<br>Zusammenarbeit zwischen Institutionen, Projekten, auch intern                                                                                       |



# I17 Extraktion

|                                                           |                                                                                                                                                                                                                                                                                                                                                                   |                                                                                                          |                         |         |                                                                                                                            |
|-----------------------------------------------------------|-------------------------------------------------------------------------------------------------------------------------------------------------------------------------------------------------------------------------------------------------------------------------------------------------------------------------------------------------------------------|----------------------------------------------------------------------------------------------------------|-------------------------|---------|----------------------------------------------------------------------------------------------------------------------------|
|                                                           | verbinden, Zusammenarbeit zwischen Literaturwissenschaftlern und Informatikern, positive Kommunikationsprobleme, derzeit ältere Forschungsarbeiten durchgehen, um sie Informatikern verständlich zu machen z.B., Anforderungen an Genauigkeit und Systematik einer Klassifikation z.B. der Terminologie in der Handschriftenbeschreibung, z.B. wird i.Z.d. erhöht |                                                                                                          |                         |         | zwischen verschiedenen Stellen, mit Technikern, Workflow<br><br><b>Zusammenarbeit</b>                                      |
| vom Interviewer thematisiert, vom Befragten konkretisiert | interdisziplinäre Austauschprozesse zwischen verschiedenen Geisteswissenschaften, Bsp. Umgang mit teuren Musikerhandschriften, TG als Plattform, Standard für den Austausch, flexibel für genau das, was man machen will, aber doch auch kompatibel                                                                                                               | als sehr hilfreich empfunden, TG als Plattform dafür gut vorstellbar, Standard für den Austausch wichtig | Produktion/Manipulation | \I17-8\ | K 5.2c<br>Interdisziplinäre Zusammenarbeit<br><br><b>Zusammenarbeit</b>                                                    |
| vom Interviewer thematisiert, vom Befragten konkretisiert | Zusammenarbeit zwischen verschiedenen germanistischen Institutionen, interdisziplinäre Z. ist geplant, Kollaboration derzeit über ein Wiki, nicht nur Ergebnisse, auch                                                                                                                                                                                            | zentral in unserer Arbeit                                                                                | Organisation/Verwaltung | \I17-9\ | K 5.2a<br>Zusammenarbeit in Teams von verschiedenen Orten aus, auch an einem Dokument, verteilte Bearbeitung verschiedener |



# I17 Extraktion

|                                              |                                                                                                                            |                     |                                                  |               |                                                                                                                                                                                                                                                                                                  |
|----------------------------------------------|----------------------------------------------------------------------------------------------------------------------------|---------------------|--------------------------------------------------|---------------|--------------------------------------------------------------------------------------------------------------------------------------------------------------------------------------------------------------------------------------------------------------------------------------------------|
|                                              | Arbeitschritte dokumentieren, wer macht was?, Skype-Konferenzen                                                            |                     |                                                  |               | ‚Schichten‘ eines Dokuments usw.<br><br><b>Zusammenarbeit</b>                                                                                                                                                                                                                                    |
| selbst thematisiert                          | Vernetzen verschiedener Projekte, Zusammenarbeit, Kommunikationsverdichtung auf technischer Grundlage, auch auf Tool-Ebene | größter Fortschritt | Organisation/Verwaltung, Produktion/Manipulation | I17-13\       | K 5.1c<br>Austausch von Arbeitsmitteln (Tools, Formaten, Skripten usw.)<br><br><b>Austausch von Inhalten und Werkzeugen</b><br><br>K 5.2b<br>Zusammenarbeit zwischen Institutionen, Projekten, auch intern zwischen verschiedenen Stellen, mit Technikern, Workflow<br><br><b>Zusammenarbeit</b> |
| <b>K 6</b><br><b>Organisation/Verwaltung</b> |                                                                                                                            |                     |                                                  |               |                                                                                                                                                                                                                                                                                                  |
| <i>Benennung</i>                             | <i>Beschreibung</i>                                                                                                        | <i>Bewertung</i>    | <i>Bezug</i>                                     | <i>Quelle</i> | <i>Reduktion</i>                                                                                                                                                                                                                                                                                 |
| ---                                          | ---                                                                                                                        | ---                 | ---                                              | ---           | ---                                                                                                                                                                                                                                                                                              |
