# Supplementary material
Source: publisher site journal article supplement (https://www.degruyterbrill.com/publication/isbn/9783110463927/downloadAsset/9783110463927_Extraktionen_Reduktionen_fallbezogen.zip)
Supplement: Supplementary file 10 [file I18 Extraktion und Reduktion.pdf › fallbezogene Extraktionen und Reduktionen/I18 Extraktion und Reduktion.pdf]

|                                                                          |                                                                                                                                                                                                     |                                                                                                            |                                                            |               |                                                                                                                                                                |
|--------------------------------------------------------------------------|-----------------------------------------------------------------------------------------------------------------------------------------------------------------------------------------------------|------------------------------------------------------------------------------------------------------------|------------------------------------------------------------|---------------|----------------------------------------------------------------------------------------------------------------------------------------------------------------|
| <b>TÄTIGKEITEN UND EDV-ERFAHRUNG</b>                                     |                                                                                                                                                                                                     |                                                                                                            |                                                            |               |                                                                                                                                                                |
| <b>Tätigkeiten</b>                                                       |                                                                                                                                                                                                     |                                                                                                            |                                                            |               |                                                                                                                                                                |
| <i>Gegenstände</i>                                                       | <i>Methoden/Verfahren</i>                                                                                                                                                                           | <i>Ziele/Fragen</i>                                                                                        | <i>Institutioneller Rahmen</i>                             | <i>Quelle</i> |                                                                                                                                                                |
| elektronische Edition, kritische Ausgabe, außerdem Forschungsplattformen | Edieren mit TUSTEP, von Anfang an datenverarbeitungsgegründet                                                                                                                                       | zielte auf eine Buchausgabe, später Schreibvorgänge in Handschriften im elektronischen Medium simulieren   | Universität und europaweiter Zusammenschluss von Projekten | \I18-1\       |                                                                                                                                                                |
| <b>Erfahrung</b>                                                         |                                                                                                                                                                                                     |                                                                                                            |                                                            |               |                                                                                                                                                                |
|                                                                          | <i>Beschreibung</i>                                                                                                                                                                                 | <i>Bewertung</i>                                                                                           |                                                            | <i>Quelle</i> |                                                                                                                                                                |
|                                                                          | seit 1979 edv-gestützte Editionen mit TUSTEP, Kooperation mit anderen Hypertext-Editons-Projekten und Arbeitsgemeinschaften, auch international, Forschungsplattformen als weiteres Betätigungsfeld | seit über 30 Jahren im Bereich edv-gestützte Edition tätig, aber kein wirklich ausgebuffter Computermensch |                                                            | \I18-1\       |                                                                                                                                                                |
| <b>BEDARFSKATEGORIEN</b>                                                 |                                                                                                                                                                                                     |                                                                                                            |                                                            |               |                                                                                                                                                                |
| <b>K 1</b>                                                               |                                                                                                                                                                                                     |                                                                                                            |                                                            |               |                                                                                                                                                                |
| <b>Bedienbarkeit</b>                                                     |                                                                                                                                                                                                     |                                                                                                            |                                                            |               |                                                                                                                                                                |
| <i>Benennung</i>                                                         | <i>Beschreibung</i>                                                                                                                                                                                 | <i>Bewertung</i>                                                                                           | <i>Bezug</i>                                               | <i>Quelle</i> | <i>Reduktion</i>                                                                                                                                               |
| selbst thematisiert                                                      | Bedienung allgemein, bei einer Demonstration von TEI p5 restlos verloren,                                                                                                                           | beachtliche Hürde                                                                                          |                                                            | \I18-16\      | K 1.1.a<br>zu schwierig / technisch für fachwissenschaftliche Nutzer, steile Lernkurve für herkömmlich Edierende<br><br><b>Benutzerführung / Erlernbarkeit</b> |
| <b>K 2</b>                                                               |                                                                                                                                                                                                     |                                                                                                            |                                                            |               |                                                                                                                                                                |

## I18 Extraktion

| <b>Rezeption/Zugriff</b>                                  |                                                                                                                                                                                                                                          |                                                                                                                                              |              |               |                                                                                                                                                                                                                                                                       |
|-----------------------------------------------------------|------------------------------------------------------------------------------------------------------------------------------------------------------------------------------------------------------------------------------------------|----------------------------------------------------------------------------------------------------------------------------------------------|--------------|---------------|-----------------------------------------------------------------------------------------------------------------------------------------------------------------------------------------------------------------------------------------------------------------------|
| <i>Benennung</i>                                          | <i>Beschreibung</i>                                                                                                                                                                                                                      | <i>Bewertung</i>                                                                                                                             | <i>Bezug</i> | <i>Quelle</i> | <i>Reduktion</i>                                                                                                                                                                                                                                                      |
| selbst thematisiert                                       | Forschungsplattform mit Zugriff auf Materialien in ihrer originalen Anschauung, Transkriptionen, vielfältige Kommentierungsmöglichkeiten, Aufsätzen, Monographien in einem größeren Netz, das sich auf die Grundlagenmaterialien bezieht | sieht nicht, dass sich TG das auf die Fahne geschrieben hat, sondern "nur" eine Toolsammlung, sehr brauchbar in einem eingeschränkten Sektor |              | \I18-6\       | K 2.1a<br>kostenloser Zugriff auf unterschiedliche Repositorien bzw. Ressourcen (z.B. Wörterbücher), Quellen und Ausgaben/ Editionen, Vergleichsmöglichkeiten mit anderen Projekten/ Quellen, orts- und rechnerunabhängiger Zugriff<br><br><b>Zugriff auf Inhalte</b> |
| vom Interviewer thematisiert, vom Befragten konkretisiert | Zugriff auf große Datenmengen                                                                                                                                                                                                            | Vor allem für Linguisten ein Mehrwert, für Literaturwissenschaftler auch sinnvoll                                                            |              | \I18-11\      | K 2.1a<br>kostenloser Zugriff auf unterschiedliche Repositorien bzw. Ressourcen (z.B. Wörterbücher), Quellen und Ausgaben/ Editionen, Vergleichsmöglichkeiten mit anderen Projekten/ Quellen, orts- und rechnerunabhängiger Zugriff<br><br><b>Zugriff auf Inhalte</b> |

## I18 Extraktion

|                                                           |                                                                                                                                                                                                                                                                                                                                                                                                                                                                                                                 |                                                             |                         |          |                                                                                                                                                                                                                                                                                                         |
|-----------------------------------------------------------|-----------------------------------------------------------------------------------------------------------------------------------------------------------------------------------------------------------------------------------------------------------------------------------------------------------------------------------------------------------------------------------------------------------------------------------------------------------------------------------------------------------------|-------------------------------------------------------------|-------------------------|----------|---------------------------------------------------------------------------------------------------------------------------------------------------------------------------------------------------------------------------------------------------------------------------------------------------------|
| vom Interviewer thematisiert, vom Befragten konkretisiert | Zugriff auf große Datenmengen in Form von Kollationierung, z.B. bei mehrfach veröffentlichten und veränderten Werken/Varianten, Vergleiche nach vorgegebenen Kriterien, Zusammenhänge zwischen stilistischen Veränderungen und Weltanschauungsveränderungen, Erkenntnisse über die Denkweise des Autors, Voraussetzung: Verankerung und vernünftige Auszeichnungen von größeren Textmengen, z.B. die gesamte deutsche Klassik oder die ganze Literatur des Expressionismus, die intelligenten Zugang ermöglicht | neue Erkenntnismöglichkeiten, möglicher Mehrwert            | Produktion/Manipulation | \I18-11\ | K 2.2a<br>Spezifizierbarkeit des Zugriffs, fachspezifische Zugriffsmöglichkeiten, verschiedene Zugriffsperspektiven durch Auszeichnungen und Präsentationsformen (z.B. parallele Ansicht von Faksimile und Transkription im TBLE)<br><br><b>Zugriffsformen, Rezeptions- und Recherche-Möglichkeiten</b> |
| vom Interviewer thematisiert, vom Befragten konkretisiert | Edition im digitalen Medium ist ein Forschungsort, ein Forschungsinstrument, gedruckt ist es ein Leseangebot, aber im digitalen Medium werden aus zeitlich geschichteten Mehrfachtexten bestehende Editionen studiert, Mehrschichtigkeit von Entwurfsmaterial, Gedankenprozesse hinter                                                                                                                                                                                                                          | Trennung neu, möglicher Mehrwert, neue Erkenntnisse möglich | Produktion/Manipulation | \I18-12\ | K 2.2a<br>Spezifizierbarkeit des Zugriffs, fachspezifische Zugriffsmöglichkeiten, verschiedene Zugriffsperspektiven durch Auszeichnungen und Präsentationsformen (z.B. parallele Ansicht von Faksimile und Transkription im TBLE)                                                                       |

# I18 Extraktion

|                                                                 |                                                                                                                                                                                                                                                                                                                                                                                                  |                                         |               |               |                                                                                                                                                                                                                                         |
|-----------------------------------------------------------------|--------------------------------------------------------------------------------------------------------------------------------------------------------------------------------------------------------------------------------------------------------------------------------------------------------------------------------------------------------------------------------------------------|-----------------------------------------|---------------|---------------|-----------------------------------------------------------------------------------------------------------------------------------------------------------------------------------------------------------------------------------------|
|                                                                 | den Veränderungen,<br>interpretierbare Schlüsse aus<br>den Differenzen                                                                                                                                                                                                                                                                                                                           |                                         |               |               | <b>Zugriffsformen,<br/>Rezeptions- und<br/>Recherche-<br/>Möglichkeiten</b>                                                                                                                                                             |
| vom Interviewer<br>thematisiert, vom Befragten<br>konkretisiert | "Lost in Hyperspace" ist<br>eine subjektive Erfahrung,<br>kann triviale Gründe haben,<br>z.B. dass die technischen<br>Vorkehrungen unbekannt<br>sind, kann aber auch daran<br>liegen, dass ein Potenzial<br>nicht erschließbar gemacht<br>worden ist, weil nicht jeder<br>an alles denken kann, mit<br>Respekt vor überkommenen<br>Konventionen Alternativen<br>denken, Schneisen<br>vorbereiten |                                         |               | \I18-15\      | K 2.2b<br>Leichte Zugänglichkeit,<br>Übersicht durch Browser,<br>Suchmasken, Ontologien,<br>Klassifizierungen,<br>Indizierungen,<br>Strukturierungen<br><br><b>Zugriffsformen,<br/>Rezeptions- und<br/>Recherche-<br/>Möglichkeiten</b> |
| selbst thematisiert                                             | einfacher Zugriff auf die<br>Infrastruktur                                                                                                                                                                                                                                                                                                                                                       | besser für technisch<br>wenig Versierte | Bedienbarkeit | \I18-16\      | K 2.2b<br>Leichte Zugänglichkeit,<br>Übersicht durch Browser,<br>Suchmasken, Ontologien,<br>Klassifizierungen,<br>Indizierungen,<br>Strukturierungen<br><br><b>Zugriffsformen,<br/>Rezeptions- und<br/>Recherche-<br/>Möglichkeiten</b> |
| <b>K 3<br/>Produktion/Manipulation</b>                          |                                                                                                                                                                                                                                                                                                                                                                                                  |                                         |               |               |                                                                                                                                                                                                                                         |
| <i>Benennung</i>                                                | <i>Beschreibung</i>                                                                                                                                                                                                                                                                                                                                                                              | <i>Bewertung</i>                        | <i>Bezug</i>  | <i>Quelle</i> | <i>Reduktion</i>                                                                                                                                                                                                                        |

# I18 Extraktion

|                     |                                                                                                                                                                                                                                                     |                                          |  |         |                                                                                                                                                                                                                                                                                                                                                                                                                                                                                                              |
|---------------------|-----------------------------------------------------------------------------------------------------------------------------------------------------------------------------------------------------------------------------------------------------|------------------------------------------|--|---------|--------------------------------------------------------------------------------------------------------------------------------------------------------------------------------------------------------------------------------------------------------------------------------------------------------------------------------------------------------------------------------------------------------------------------------------------------------------------------------------------------------------|
| selbst thematisiert | Text-Bild-Editor bzw. - Koordination, Teilnahme an weiterem TG-externen Workshop, Einladung an TG-Mitarbeiter                                                                                                                                       | besonderes Interesse                     |  | \I18-2\ | <p>K 3.3d<br/>Verknüpfungs-<br/>möglichkeiten Text-Bild,<br/>Transkriptions-<br/>/Faksimile-Ansicht</p> <p><b>Verknüpfungs-<br/>möglichkeiten und<br/>deren Visualisierung</b></p>                                                                                                                                                                                                                                                                                                                           |
| selbst thematisiert | Aufgliederung und Strukturierung der Arbeitsschritte in der Edition für die Datenverarbeitung: Texterfassung, Kollationierung, Zusammenführung von Schichten der Entwicklung, Apparaterstellung - also string-verarbeitende Prozeduren unter TUSTEP | beim Ziel Druckedition besonders wichtig |  | \I18-3\ | <p>K 3.1b<br/>XML-Auszeichnungs-<br/>bzw. Produktionshilfe,<br/>Tools zur digitalen<br/>Herstellung und<br/>Verfügbarmachung von<br/>Texten, XML-Schemata<br/>vorgefertigt für<br/>verschiedene individuelle<br/>Bedürfnisse,<br/>Konvertierung in<br/>XML/TEI, Baseline<br/>Encoding, Streaming<br/>Editor, Unterstützung bei<br/>zunächst geringerer<br/>Auszeichnungstiefe</p> <p><b>XML-Produktion</b></p> <p>und</p> <p>K 3.2b<br/>Unterschiede durch<br/>Textvergleich<br/>(Kollationierung, TBLE)</p> |

|  |  |  |  |  |                                                                                                                                                                                                                                                                                                                                                                                                                                                                                                                                                                      |
|--|--|--|--|--|----------------------------------------------------------------------------------------------------------------------------------------------------------------------------------------------------------------------------------------------------------------------------------------------------------------------------------------------------------------------------------------------------------------------------------------------------------------------------------------------------------------------------------------------------------------------|
|  |  |  |  |  | <p>visualisieren, Schreiberhände vergleichen, Textgenese, Entwicklungsprozess rekonstruieren und darstellen, Schichten und Räumlichkeit darstellen, multiperspektivischen Zugang schaffen</p> <p><b>Analyse- und Visualisierungsmöglichkeiten</b></p> <p>und</p> <p>K 3.4c<br/>Veränderung von Arbeitsprozessen durch digitale Technik (nicht bzgl. Hypothesenbildung, Erkenntnisse usw.), Aufbrechen von Medienkonventionen vs. Ausrichtung auf das Buch als Hürde und</p> <p>K 3.4d<br/>TUSTEP-Funktionalität</p> <p><b>Produktionsunterstützung allgemein</b></p> |
|--|--|--|--|--|----------------------------------------------------------------------------------------------------------------------------------------------------------------------------------------------------------------------------------------------------------------------------------------------------------------------------------------------------------------------------------------------------------------------------------------------------------------------------------------------------------------------------------------------------------------------|

## I18 Extraktion

|                     |                                                                                                                                                                                                                                                                                                                                                                                                                                                                                       |                                                                                                                                                                                                           |                                              |         |                                                                                                                                                                                                                                                                                                                   |
|---------------------|---------------------------------------------------------------------------------------------------------------------------------------------------------------------------------------------------------------------------------------------------------------------------------------------------------------------------------------------------------------------------------------------------------------------------------------------------------------------------------------|-----------------------------------------------------------------------------------------------------------------------------------------------------------------------------------------------------------|----------------------------------------------|---------|-------------------------------------------------------------------------------------------------------------------------------------------------------------------------------------------------------------------------------------------------------------------------------------------------------------------|
| selbst thematisiert | Schreibabläufe in einer Handschrift analysieren und präsentieren, zeitliche Abfolgen postulieren, nach Möglichkeit beweisen, Umsetzung an der Schnittstelle zwischen Benutzern und Speicherung, damit andere das nachvollziehen können, evtl. zu anderen Schlüssen kommen können --> Auszeichnungsverfahren, genetisch, Entwicklungsstufen, Diachronie in Taggings umsetzen, stufenweise Aufrufbarkeit/Abtragbarkeit, diesbezüglich dynamische Verknüpfung von Bild und Transkription | Wesentliche Anforderung als Literaturkritiker und Editor, zentraler Aspekt                                                                                                                                | Rezeption/Zugriff, Kollaboration/Kooperation | \I18-4\ | K 3.2b<br>Unterschiede durch Textvergleich (Kollationierung, TBLE) visualisieren, Schreiberhände vergleichen, Textgenese, Entwicklungsprozess rekonstruieren und darstellen, Schichten und Räumlichkeit darstellen, multiperspektivischen Zugang schaffen<br><br><b>Analyse- und Visualisierungsmöglichkeiten</b> |
| selbst thematisiert | Werkzeugpaket, Gebilde von Tools, um eine spezifische Ausgabe wie die wissenschaftliche Edition zu unterstützen                                                                                                                                                                                                                                                                                                                                                                       | Kommunikation der TG-Idee so wahrgenommen, dezidiert umrissenes Ziel, aber auf herkömmliche wissenschaftliche Tätigkeit Edition ausgerichtet, sieht weitergehendes Potenzial, Tools als Teilvoraussetzung |                                              | \I18-6\ | K 3.4a<br>Arbeitsumgebung mit Tool-Angebot, nicht alles neu /selbst programmieren, kostenlos<br><br><b>Produktionsunterstützung allgemein</b>                                                                                                                                                                     |
| selbst thematisiert | Kommentieren als eine neue Art der Strukturierung,                                                                                                                                                                                                                                                                                                                                                                                                                                    | Wichtiger Punkt, Umdenken von                                                                                                                                                                             | Kollaboration/Kooperation                    | \I18-7\ | K 3.3c<br>kollaborative                                                                                                                                                                                                                                                                                           |

## I18 Extraktion

|                                                           |                                                                                                                                                                                                                                               |                                                                        |                   |          |                                                                                                                                                                                                                                                                                               |
|-----------------------------------------------------------|-----------------------------------------------------------------------------------------------------------------------------------------------------------------------------------------------------------------------------------------------|------------------------------------------------------------------------|-------------------|----------|-----------------------------------------------------------------------------------------------------------------------------------------------------------------------------------------------------------------------------------------------------------------------------------------------|
|                                                           | Diskursschicht innerhalb des Studienobjekts Edition, Hypertext mit relationalen Verknüpfungen, Setzen von Kommentierungsnetz-Layern durch den Editor, definierte Themenbereiche mit Bezug zu Materialien, außerdem Querverknüpfungen --> Netz | herkömmlichen Kommentierungsformen in linearer Buchform empfehlenswert |                   |          | Kommentierungen durch Nutzer, Agenda/Korrigenda, Notepad<br><br><b>Verknüpfungsmöglichkeiten und deren Visualisierung</b>                                                                                                                                                                     |
| selbst thematisiert                                       | semantische Erschließungen sind entscheidend für die Räumlichkeit des Forschungsortes, alte Regeledition nicht mehr haltbar, man muss überlegen, wie weit man noch dekretieren will, Autokratie wird im digitalen Medium reduziert            | entscheidend                                                           |                   | \I18-13\ | K 3.1c<br>Auszeichnungsmöglichkeiten / Informationsanreicherung zur Bearbeitung neuer Fragestellungen, tiefere Auszeichnung, spezifischere Auszeichnung je nach Forschungsinteresse (z.B. Musikwissenschaft), semantische Auszeichnung, Informationsmodellierung<br><br><b>XML-Produktion</b> |
| vom Interviewer thematisiert, vom Befragten konkretisiert | Forschungsort<br>Forschungsumgebung wird im Gehirn anders konstruiert als das Buch, Impuls, mich an einem Ort aufzuhalten und mich zu bewegen kommt aus der relationalen                                                                      |                                                                        | Rezeption/Zugriff | \I18-13\ | K 3.3a<br>Verknüpfungsmöglichkeiten Text-Text (z.B. editionswiss. Kommentarfunktionen, Varianten verknüpfen, Apparat,                                                                                                                                                                         |



# I18 Extraktion

|                                          |                                                                                            |                  |                         |               |                                                                                                                                                                                                                                 |
|------------------------------------------|--------------------------------------------------------------------------------------------|------------------|-------------------------|---------------|---------------------------------------------------------------------------------------------------------------------------------------------------------------------------------------------------------------------------------|
|                                          | Anordnung, was verfügbar gemacht wird, verbale Verknüpfungen und semantische Verknüpfungen |                  |                         |               | Quellen/Referenzen, Register, Wörterbücher, Briefe)<br><br>und<br><br>K 3.3b<br>Visualisierung von Beziehungen (z. B. in Briefnetzen), Mustererkennung<br><br><b>Verknüpfungsmöglichkeiten und deren Visualisierung</b>         |
| selbst thematisiert                      | mit Respekt vor überkommenen Konventionen Alternativen denken, Schneisen vorbereiten       | Wichtig          |                         | \I18-15\      | K 3.2a<br>Verknüpfung von Tools, kreative Ansätze (z.B. Wörterbücher zur Kollationierung nutzen, Lemmatisierung mit Wörterbüchern verbinden), interdisziplinäre Ansätze<br><br><b>Analyse- und Visualisierungsmöglichkeiten</b> |
| <b>K 4<br/>Modularität/Anpassbarkeit</b> |                                                                                            |                  |                         |               |                                                                                                                                                                                                                                 |
| <i>Benennung</i>                         | <i>Beschreibung</i>                                                                        | <i>Bewertung</i> | <i>Bezug</i>            | <i>Quelle</i> | <i>Reduktion</i>                                                                                                                                                                                                                |
| selbst thematisiert                      | Anpassungen von TUSTEP-                                                                    | notwendig        | Produktion/Manipulation | \I18-3\       | K 4.2b                                                                                                                                                                                                                          |

## I18 Extraktion

|                                                           |                                                                                                                                                                                                                        |                                                 |                                            |          |                                                                                                                |
|-----------------------------------------------------------|------------------------------------------------------------------------------------------------------------------------------------------------------------------------------------------------------------------------|-------------------------------------------------|--------------------------------------------|----------|----------------------------------------------------------------------------------------------------------------|
|                                                           | Funktionen waren notwendig,<br>Belastungsgrenze                                                                                                                                                                        |                                                 |                                            |          | Anpassbarkeit von Tools an das jeweilige Projekt / die jeweiligen Gegenstände<br><br><b>Tools und Services</b> |
| vom Interviewer thematisiert, vom Befragten konkretisiert | Satellitenplattformen, Forschungsplattform, bei der man einen vertretbaren Entwicklungsstand öffnet, Forscher/innen für sich etwas anlagern oder Anlagerungen zur Verfügung stellt, auch für einen Peer-Review-Prozess | Vielversprechend, einer der spannendsten Punkte | Kollaboration/Kooperation                  | \I18-8\  | K 4.3a<br>Anschließbarkeit/<br>Nachnutzung von Ressourcen, Formate mappen<br><br><b>Inhalte</b>                |
| vom Interviewer thematisiert, vom Befragten konkretisiert | Edition als Geflecht aus im Prinzip gleichberechtigten Diskursen, die Umschichtungen ermöglichen, Zugang anpassbar an aktuelle Interessenlage, entsprechende Auszeichnungen für Zugangsmöglichkeiten                   | Wunsch, wichtiger Aspekt                        | Produktion/Manipulation, Rezeption/Zugriff | \I18-14\ | K 4.3b<br>erweiterbare / veränderbare Projekte / Objekte / Editionen<br><br><b>Inhalte</b>                     |
| selbst thematisiert                                       | Mitwirkungspotenzial an der Schnittstelle des Produkts und seiner Benutzer, flexible Benutzerinterfaces                                                                                                                | zu wenig bedacht                                | Organisation/Verwaltung, Bedienbarkeit     | \I18-16\ | K 4.1a<br>Anpassung der Oberflächen-Konfiguration<br><br><b>TextGrid-Oberfläche / Umgebung</b><br><br>und      |

|                                                |                                                                                                                                                                                                   |                                                              |                           |               |                                                                                                                                                                              |
|------------------------------------------------|---------------------------------------------------------------------------------------------------------------------------------------------------------------------------------------------------|--------------------------------------------------------------|---------------------------|---------------|------------------------------------------------------------------------------------------------------------------------------------------------------------------------------|
|                                                |                                                                                                                                                                                                   |                                                              |                           |               | K 4.2b<br>Anpassbarkeit von Tools<br>an das jeweilige Projekt /<br>die jeweiligen<br>Gegenstände<br><br><b>Tools und Services</b>                                            |
| <b>K 5</b><br><b>Kollaboration/Kooperation</b> |                                                                                                                                                                                                   |                                                              |                           |               |                                                                                                                                                                              |
| <i>Benennung</i>                               | <i>Beschreibung</i>                                                                                                                                                                               | <i>Bewertung</i>                                             | <i>Bezug</i>              | <i>Quelle</i> | <i>Reduktion</i>                                                                                                                                                             |
| selbst thematisiert                            | Arbeitsteilung zwischen Leuten, die bis hin zu einer praktischen Berührung die Sache verstehen und differenzierter auf technische Applikationen reagieren können, und technisch versierten Leuten | nichts anderes für möglich gehalten                          | Bedienbarkeit             | \I18-5\       | K 5.2b<br>Zusammenarbeit<br>zwischen Institutionen,<br>Projekten, auch intern<br>zwischen verschiedenen<br>Stellen, mit Technikern,<br>Workflow<br><br><b>Zusammenarbeit</b> |
| selbst thematisiert                            | Verfügbarmachung eigener Daten für Forschungsplattformen mit Peer-Review-Prozessen,                                                                                                               | einer der spannendsten Punkte                                | Modularität/Anpassbarkeit | \I18-8\       | K 5.1a<br>Austausch von<br>Ressourcen, Nachnutzung<br><br><b>Austausch von Inhalten<br/>         und Werkzeugen</b>                                                          |
| selbst thematisiert                            | Voraussetzung für das Bilden von Forschungsgemeinschaften ist die Ermöglichung der Anreicherung einer Plattform mit Beiträgen,                                                                    | Anfangsschwierigkeit, wichtiger Aspekt, Voraussetzung für DH | Modularität/Anpassbarkeit | \I18-9\       | K 5.1a<br>Austausch von<br>Ressourcen, Nachnutzung<br><br><b>Austausch von Inhalten<br/>         und Werkzeugen</b>                                                          |

|                                              |                                                                                                                                                                                                                                                                                                                                                                                                                                            |                              |                                                  |               |                                                                                                                                                                                                                                                             |
|----------------------------------------------|--------------------------------------------------------------------------------------------------------------------------------------------------------------------------------------------------------------------------------------------------------------------------------------------------------------------------------------------------------------------------------------------------------------------------------------------|------------------------------|--------------------------------------------------|---------------|-------------------------------------------------------------------------------------------------------------------------------------------------------------------------------------------------------------------------------------------------------------|
|                                              | Voraussetzung ist auch Peer Review, dafür wiederum Konstitution einer internationalen Gemeinschaft aus Personen im Netz notwendig, Umorientierung des Forschungsverständnisses gerade in den Geisteswissenschaften erforderlich, weg vom abgeschotteten Individualbereich hin zum kommunikativen gemeinschaftlichen, Anerkennung von Leistungen als Problematik, Veränderungen vergleichbar mit den Forschergruppen in Naturwissenschaften |                              |                                                  |               | und<br><br>K 5.3a<br>Partizipation/Nutzung als Voraussetzung<br>und<br>K 5.3b<br>Community-Building erforderlich, Umdenken erforderlich, durch Überzeugungsarbeit, Veranstaltungen und Erfahrungsaustausch anregen<br><br><b>Community-Building-Aspekte</b> |
| selbst thematisiert                          | nicht das Medium, in dem man forscht und verwaltet, gibt die innovativen Schübe, sondern Leistungen von Individuen oder Gruppen, harmonische Gruppe kann oft mehr bringen                                                                                                                                                                                                                                                                  | Mehrwert durch Kollaboration | Produktion/Manipulation, Organisation/Verwaltung | \I18-10\      | K 5.2a<br>Zusammenarbeit in Teams von verschiedenen Orten aus, auch an einem Dokument, verteilte Bearbeitung verschiedener ‚Schichten‘ eines Dokuments usw.<br><br><b>Zusammenarbeit</b>                                                                    |
| <b>K 6</b><br><b>Organisation/Verwaltung</b> |                                                                                                                                                                                                                                                                                                                                                                                                                                            |                              |                                                  |               |                                                                                                                                                                                                                                                             |
| <i>Benennung</i>                             | <i>Beschreibung</i>                                                                                                                                                                                                                                                                                                                                                                                                                        | <i>Bewertung</i>             | <i>Bezug</i>                                     | <i>Quelle</i> | <i>Reduktion</i>                                                                                                                                                                                                                                            |
| selbst thematisiert                          | mit zu großer                                                                                                                                                                                                                                                                                                                                                                                                                              | zu starker Schwerpunkt       |                                                  | \I18-16\      | K 6.1b                                                                                                                                                                                                                                                      |

## I18 Extraktion

|  |                                                                                               |  |  |  |                                                                                                                                                                                                                 |
|--|-----------------------------------------------------------------------------------------------|--|--|--|-----------------------------------------------------------------------------------------------------------------------------------------------------------------------------------------------------------------|
|  | Ausschließlichkeit<br>Produktion digitaler<br>Reservoirs und interner<br>digitaler Strukturen |  |  |  | <p>Datenspeicherung und<br/>–verwaltung,<br/>Langzeitarchivierung,<br/>verbunden mit<br/>Bearbeitungs-<br/>möglichkeiten und<br/>Nachnutzung</p> <p><b>Organisation und<br/>Verwaltung von<br/>Inhalten</b></p> |
|--|-----------------------------------------------------------------------------------------------|--|--|--|-----------------------------------------------------------------------------------------------------------------------------------------------------------------------------------------------------------------|
