# Supplementary material
Source: publisher site journal article supplement (https://www.degruyterbrill.com/publication/isbn/9783110463927/downloadAsset/9783110463927_Extraktionen_Reduktionen_fallbezogen.zip)
Supplement: Supplementary file 11 [file I19 Extraktion und Reduktion.pdf › fallbezogene Extraktionen und Reduktionen/I19 Extraktion und Reduktion.pdf]

## I19 Extraktion

| <b>TÄTIGKEITEN UND EDV-ERFAHRUNG</b> |                                                                                                           |                                                                                 |                                               |               |                                                                                                                        |
|--------------------------------------|-----------------------------------------------------------------------------------------------------------|---------------------------------------------------------------------------------|-----------------------------------------------|---------------|------------------------------------------------------------------------------------------------------------------------|
| <b>Tätigkeiten</b>                   |                                                                                                           |                                                                                 |                                               |               |                                                                                                                        |
| <i>Gegenstände</i>                   | <i>Methoden/Verfahren</i>                                                                                 | <i>Ziele/Fragen</i>                                                             | <i>Institutioneller Rahmen</i>                | <i>Quelle</i> |                                                                                                                        |
| Edition und Quellenforschung         | konventionelle, nicht-digitale Edition                                                                    | gedruckte Edition                                                               | Universität, Forschungs- bzw. Editionsprojekt | \I19-1\       |                                                                                                                        |
| Edition, Quellen                     | Transkription von Quellen bisher nicht mit digitalisierten Quellen                                        | Transkription                                                                   | Universität, Forschungs- bzw. Editionsprojekt | \I19-4\       |                                                                                                                        |
| <b>Erfahrung</b>                     |                                                                                                           |                                                                                 |                                               |               |                                                                                                                        |
|                                      | <i>Beschreibung</i>                                                                                       | <i>Bewertung</i>                                                                |                                               | <i>Quelle</i> |                                                                                                                        |
|                                      | Internetrecherche für Quellenforschung, keine DH-Erfahrung, keine Erfahrung im Bereich digitale Editionen | keine Erfahrung, unbedarf                                                       |                                               | \I19-1\       |                                                                                                                        |
|                                      | bisher nur mit Word gearbeitet, nicht mit XML                                                             | alles neu in TG                                                                 |                                               | \I19-4\       |                                                                                                                        |
| <b>BEDARFSKATEGORIEN</b>             |                                                                                                           |                                                                                 |                                               |               |                                                                                                                        |
| <b>K 1</b>                           |                                                                                                           |                                                                                 |                                               |               |                                                                                                                        |
| <b>Bedienbarkeit</b>                 |                                                                                                           |                                                                                 |                                               |               |                                                                                                                        |
| <i>Benennung</i>                     | <i>Beschreibung</i>                                                                                       | <i>Bewertung</i>                                                                | <i>Bezug</i>                                  | <i>Quelle</i> | <i>Reduktion</i>                                                                                                       |
| vom Interviewer thematisiert         | Gesamteindruck vom Lab                                                                                    | es ist halt noch so ein bisschen in der Entwicklung                             |                                               | \I19-2\       | K 1.3a<br>Kinderkrankheiten sind normal, ist noch in der Entwicklung<br><br><b>Systemstabilität, Programmierfehler</b> |
| vom Interviewer thematisiert         | lernt man nur, indem man es tut, ich denke, man kommt schnell rein, wenig rumprobiert                     | unproblematisch nach dem ersten Eindruck, Workshop zu kurz für eine Beurteilung |                                               | \I19-6\       | K 1.1h<br>schwer zu beurteilen, weil im Workshop geführt bzw. nur an einem Bsp. gearbeitet wurde, zu wenig             |

# I19 Extraktion

|                                  |                                 |                             |                         |               |                                                                                                                                                                                                                                                                       |
|----------------------------------|---------------------------------|-----------------------------|-------------------------|---------------|-----------------------------------------------------------------------------------------------------------------------------------------------------------------------------------------------------------------------------------------------------------------------|
|                                  |                                 |                             |                         |               | Zeit war, Tool nicht fertig war und<br>K 1.1i<br>unproblematisch, Übungssache<br><br><b>Benutzerführung / Erlernbarkeit</b>                                                                                                                                           |
| selbst thematisiert              | einfach zu bedienende Anwendung | Wichtiger Aspekt            | Rezeption/Zugriff       | \I19-11\      | K 1.1i<br>unproblematisch, Übungssache<br><br><b>Benutzerführung / Erlernbarkeit</b>                                                                                                                                                                                  |
| <b>K 2<br/>Rezeption/Zugriff</b> |                                 |                             |                         |               |                                                                                                                                                                                                                                                                       |
| <i>Benennung</i>                 | <i>Beschreibung</i>             | <i>Bewertung</i>            | <i>Bezug</i>            | <i>Quelle</i> | <i>Reduktion</i>                                                                                                                                                                                                                                                      |
| selbst thematisiert              | leichter Zugriff auf Quellen    | enorme Arbeitserleichterung | Produktion/Manipulation | \I19-2\       | K 2.1a<br>kostenloser Zugriff auf unterschiedliche Repositorien bzw. Ressourcen (z.B. Wörterbücher), Quellen und Ausgaben/ Editionen, Vergleichsmöglichkeiten mit anderen Projekten/ Quellen, orts- und rechnerunabhängiger Zugriff<br><br><b>Zugriff auf Inhalte</b> |

## I19 Extraktion

|                     |                                                                                  |                                                                                                                    |                         |         |                                                                                                                                                                                                                                                                                                         |
|---------------------|----------------------------------------------------------------------------------|--------------------------------------------------------------------------------------------------------------------|-------------------------|---------|---------------------------------------------------------------------------------------------------------------------------------------------------------------------------------------------------------------------------------------------------------------------------------------------------------|
| selbst thematisiert | Zugriff auf weniger populäre Texte, auf Quellen und Datenbanken                  | schwierig, leichter Zugang wäre eine enorme Arbeitserleichterung, könnte sich vorstellen, TextGrid dafür zu nutzen | Produktion/Manipulation | \I19-3\ | K 2.1a<br>kostenloser Zugriff auf unterschiedliche Repositorien bzw. Ressourcen (z.B. Wörterbücher), Quellen und Ausgaben/ Editionen, Vergleichsmöglichkeiten mit anderen Projekten/ Quellen, orts- und rechnerunabhängiger Zugriff<br><br><b>Zugriff auf Inhalte</b>                                   |
| selbst thematisiert | präzises Lesen bzw. Vergrößern schwieriger Stellen mit dem Text-Bild-Link-Editor | besonders wichtig für meine Arbeit                                                                                 | Produktion/Manipulation | \I19-5\ | K 2.2a<br>Spezifizierbarkeit des Zugriffs, fachspezifische Zugriffsmöglichkeiten, verschiedene Zugriffsperspektiven durch Auszeichnungen und Präsentationsformen (z.B. parallele Ansicht von Faksimile und Transkription im TBLE)<br><br><b>Zugriffsformen, Rezeptions- und Recherche-möglichkeiten</b> |
| selbst thematisiert | Recherchieren und Finden von Quellen, schnell weltweit zugreifen,                | besonders wichtig für meine Arbeit, enorme Arbeitserleichterung                                                    | Produktion/Manipulation | \I19-5\ | K 2.1a<br>kostenloser Zugriff auf unterschiedliche                                                                                                                                                                                                                                                      |

## I19 Extraktion

|                     |                                                                                                         |                                                                            |                         |          |                                                                                                                                                                                                                                                                                                         |
|---------------------|---------------------------------------------------------------------------------------------------------|----------------------------------------------------------------------------|-------------------------|----------|---------------------------------------------------------------------------------------------------------------------------------------------------------------------------------------------------------------------------------------------------------------------------------------------------------|
|                     | Bündelung                                                                                               |                                                                            |                         |          | Repositorien bzw. Ressourcen (z.B. Wörterbücher), Quellen und Ausgaben/ Editionen, Vergleichsmöglichkeiten mit anderen Projekten/ Quellen, orts- und rechnerunabhängiger Zugriff<br><br><b>Zugriff auf Inhalte</b>                                                                                      |
| selbst thematisiert | neue Erkenntnisse aus der Zusammenschau statt des Hintereinanderarbeitens                               | Möglichkeit für neue Erkenntnisse                                          | Produktion/Manipulation | \I19-10\ | K 2.2a<br>Spezifizierbarkeit des Zugriffs, fachspezifische Zugriffsmöglichkeiten, verschiedene Zugriffsperspektiven durch Auszeichnungen und Präsentationsformen (z.B. parallele Ansicht von Faksimile und Transkription im TBLE)<br><br><b>Zugriffsformen, Rezeptions- und Recherche-möglichkeiten</b> |
| selbst thematisiert | Quellen-Vernetzungsmöglichkeit und Quellenzugriff, digitaler Zugriff im Vergleich zu haptischen Zugriff | größter Fortschritt, gegenüber haptischem Zugriff geht aber etwas verloren |                         | \I19-11\ | K 2.1a<br>kostenloser Zugriff auf unterschiedliche Repositorien bzw. Ressourcen (z.B. Wörterbücher), Quellen                                                                                                                                                                                            |

# I19 Extraktion

|                                        |                                             |                            |              |               |                                                                                                                                                                                                                                                                       |
|----------------------------------------|---------------------------------------------|----------------------------|--------------|---------------|-----------------------------------------------------------------------------------------------------------------------------------------------------------------------------------------------------------------------------------------------------------------------|
|                                        |                                             |                            |              |               | und Ausgaben/ Editionen, Vergleichsmöglichkeiten mit anderen Projekten/ Quellen, orts- und rechnerunabhängiger Zugriff<br><br><b>Zugriff auf Inhalte</b>                                                                                                              |
| vom Interviewer thematisiert           | Zugriff auf das Wörterbuchnetz              | große Arbeitserleichterung |              | \I19-12\      | K 2.1a<br>kostenloser Zugriff auf unterschiedliche Repositorien bzw. Ressourcen (z.B. Wörterbücher), Quellen und Ausgaben/ Editionen, Vergleichsmöglichkeiten mit anderen Projekten/ Quellen, orts- und rechnerunabhängiger Zugriff<br><br><b>Zugriff auf Inhalte</b> |
| <b>K 3<br/>Produktion/Manipulation</b> |                                             |                            |              |               |                                                                                                                                                                                                                                                                       |
| <i>Benennung</i>                       | <i>Beschreibung</i>                         | <i>Bewertung</i>           | <i>Bezug</i> | <i>Quelle</i> | <i>Reduktion</i>                                                                                                                                                                                                                                                      |
| selbst thematisiert                    | Transkription mit dem Text-Bild-Link-Editor | neue Erfahrung             |              | \I19-4\       | K 3.3d<br>Verknüpfungsmöglichkeiten Text-Bild, Transkriptions-/Faksimile-Ansicht<br><br><b>Verknüpfungsmöglichkeiten und deren</b>                                                                                                                                    |

## I19 Extraktion

|                     |                                                                                                                                                         |                                   |                   |          | <b>Visualisierung</b>                                                                                                                                                                                                                                                                                                                                                                                                                                                                                                            |
|---------------------|---------------------------------------------------------------------------------------------------------------------------------------------------------|-----------------------------------|-------------------|----------|----------------------------------------------------------------------------------------------------------------------------------------------------------------------------------------------------------------------------------------------------------------------------------------------------------------------------------------------------------------------------------------------------------------------------------------------------------------------------------------------------------------------------------|
| selbst thematisiert | Mustererkennung, z.B. durch Sichtbarmachen von Bezügen zu Quellen, die der Autor des zu edierenden Textes benutzt hat, Zusammenspiel der Quellen zeigen | Möglichkeit für neue Erkenntnisse | Rezeption/Zugriff | \I19-10\ | <p>K 3.2c<br/>Visualisierung von Auszeichnungen, Worthäufigkeiten, Kollokationen, Themaerschließung, Mustererkennung</p> <p><b>Analyse- und Visualisierungsmöglichkeiten</b></p> <p>und</p> <p>K 3.3a<br/>Verknüpfungsmöglichkeiten Text-Text (z.B. editionswiss. Kommentarfunktionen, Varianten verknüpfen, Apparat, Quellen/Referenzen, Register, Wörterbücher, Briefe)<br/>und</p> <p>K 3.3b<br/>Visualisierung von Beziehungen (z. B. in Briefnetzen), Mustererkennung</p> <p><b>Verknüpfungsmöglichkeiten und deren</b></p> |

|                                                |                                                                                                                         |                                                                                     |                                                     |               |                                                                                                                                                                                                                                                                                |
|------------------------------------------------|-------------------------------------------------------------------------------------------------------------------------|-------------------------------------------------------------------------------------|-----------------------------------------------------|---------------|--------------------------------------------------------------------------------------------------------------------------------------------------------------------------------------------------------------------------------------------------------------------------------|
|                                                |                                                                                                                         |                                                                                     |                                                     |               | <b>Visualisierung</b>                                                                                                                                                                                                                                                          |
| selbst thematisiert                            | Quellen-<br>Vernetzungsmöglichkeit<br>und Quellenzugriff,<br>digitaler Zugriff im<br>Vergleich zu haptischen<br>Zugriff | größter Fortschritt,<br>gegenüber haptischem<br>Zugriff geht aber etwas<br>verloren |                                                     | \\I19-11\\    | K 3.3a<br>Verknüpfungs-<br>möglichkeiten Text-Text<br>(z.B. editionswiss.<br>Kommentarfunktionen,<br>Varianten verknüpfen,<br>Apparat,<br>Quellen/Referenzen,<br>Register, Wörterbücher,<br>Briefe)<br><br><b>Verknüpfungs-<br/>möglichkeiten und deren<br/>Visualisierung</b> |
| <b>K 4</b><br><b>Modularität/Anpassbarkeit</b> |                                                                                                                         |                                                                                     |                                                     |               |                                                                                                                                                                                                                                                                                |
| <i>Benennung</i>                               | <i>Beschreibung</i>                                                                                                     | <i>Bewertung</i>                                                                    | <i>Bezug</i>                                        | <i>Quelle</i> | <i>Reduktion</i>                                                                                                                                                                                                                                                               |
|                                                |                                                                                                                         |                                                                                     |                                                     |               |                                                                                                                                                                                                                                                                                |
| <b>K 5</b><br><b>Kollaboration/Kooperation</b> |                                                                                                                         |                                                                                     |                                                     |               |                                                                                                                                                                                                                                                                                |
| <i>Benennung</i>                               | <i>Beschreibung</i>                                                                                                     | <i>Bewertung</i>                                                                    | <i>Bezug</i>                                        | <i>Quelle</i> | <i>Reduktion</i>                                                                                                                                                                                                                                                               |
| selbst thematisiert                            | gemeinsame Arbeit in<br>einem Projekt von<br>verschiedenen Orten aus                                                    | Arbeitserleichterung                                                                | Organisation/Verwaltung,<br>Produktion/Manipulation | \\I19-7\\     | K 5.2a<br>Zusammenarbeit in Teams<br>von verschiedenen Orten<br>aus, auch an einem<br>Dokument, verteilte<br>Bearbeitung verschiedener<br>'Schichten' eines<br>Dokuments usw.<br><br><b>Zusammenarbeit</b>                                                                     |

# I19 Extraktion

|                     |                                                                                                                                                                                                                                                                                                                              |                                                                            |                         |         |                                                                                                                                                                                                                      |
|---------------------|------------------------------------------------------------------------------------------------------------------------------------------------------------------------------------------------------------------------------------------------------------------------------------------------------------------------------|----------------------------------------------------------------------------|-------------------------|---------|----------------------------------------------------------------------------------------------------------------------------------------------------------------------------------------------------------------------|
| selbst thematisiert | viele Wissenschaftler werden ihre Daten nicht preisgeben, bevor sie nicht veröffentlicht sind, nur vielleicht innerhalb eines gemeinsamen Projekts                                                                                                                                                                           | problematisch                                                              | Organisation/Verwaltung | \I19-7\ | K 5.1b<br>Austausch von Arbeits- bzw. Forschungsergebnissen, Bereitschaft dazu<br><br><b>Austausch von Inhalten und Werkzeugen</b>                                                                                   |
| selbst thematisiert | Bibliotheken und Archive müssten mitarbeiten, um Zugriff auf Quellen zu ermöglichen                                                                                                                                                                                                                                          | hoher technischer Aufwand, müsste man aber hinbekommen, muss das Ziel sein |                         | \I19-8\ | K 5.2b<br>Zusammenarbeit zwischen Institutionen, Projekten, auch intern zwischen verschiedenen Stellen, mit Technikern, Workflow<br><br><b>Zusammenarbeit</b>                                                        |
| selbst thematisiert | Austausch unter Wissenschaftlern als wichtige Funktion, gemeinsames Projekt / Programm / Instrumentarium / Anwendungen für die Edition, Treffen sind auch wichtig, Kommunikationsmöglichkeiten über so ein Programm verbessern / ausbauen, auch vom Preisgeben von Daten abhängig, auch von der Quellenlage vor Ort abhängig | Wichtiger Punkt                                                            | Organisation/Verwaltung | \I19-9\ | K 5.1a<br>Austausch von Ressourcen, Nachnutzung<br><br><b>Austausch von Inhalten und Werkzeugen</b><br><br>und<br><br>K 5.3d<br>Kommunikationsplattform, Social-Anwendungen<br><br><b>Community-Building-Aspekte</b> |
| <b>K 6</b>          |                                                                                                                                                                                                                                                                                                                              |                                                                            |                         |         |                                                                                                                                                                                                                      |



# I19 Extraktion

|                                |                     |                  |              |               |                  |
|--------------------------------|---------------------|------------------|--------------|---------------|------------------|
| <b>Organisation/Verwaltung</b> |                     |                  |              |               |                  |
| <i>Benennung</i>               | <i>Beschreibung</i> | <i>Bewertung</i> | <i>Bezug</i> | <i>Quelle</i> | <i>Reduktion</i> |
|                                |                     |                  |              |               |                  |
