# Supplementary material
Source: publisher site journal article supplement (https://www.degruyterbrill.com/publication/isbn/9783110463927/downloadAsset/9783110463927_Extraktionen_Reduktionen_fallbezogen.zip)
Supplement: Supplementary file 12 [file I2 Extraktion und Reduktion.pdf › fallbezogene Extraktionen und Reduktionen/I2 Extraktion und Reduktion.pdf]

## I2 Extraktion

| <b>TÄTIGKEITEN UND EDV-ERFAHRUNG</b>                                                                            |                                                                                                                          |                                                                                                                   |                                |               |                                                                                                                                       |
|-----------------------------------------------------------------------------------------------------------------|--------------------------------------------------------------------------------------------------------------------------|-------------------------------------------------------------------------------------------------------------------|--------------------------------|---------------|---------------------------------------------------------------------------------------------------------------------------------------|
| <b>Tätigkeiten</b>                                                                                              |                                                                                                                          |                                                                                                                   |                                |               |                                                                                                                                       |
| <i>Gegenstände</i>                                                                                              | <i>Methoden/Verfahren</i>                                                                                                | <i>Ziele/Fragen</i>                                                                                               | <i>Institutioneller Rahmen</i> | <i>Quelle</i> |                                                                                                                                       |
| philologische Arbeit mit Hypertext, Herausgeber einer Hybridedition, wissenschaftliches Publizieren, Schulungen | Hypertext erstellen, digital edieren, Programmierung                                                                     | Intertextualitätskonzept umsetzen als Hypertext                                                                   | Literaturarchiv                | \I2-1\        |                                                                                                                                       |
| <b>Erfahrung</b>                                                                                                |                                                                                                                          |                                                                                                                   |                                |               |                                                                                                                                       |
|                                                                                                                 | <i>Beschreibung</i>                                                                                                      | <i>Bewertung</i>                                                                                                  |                                | <i>Quelle</i> |                                                                                                                                       |
|                                                                                                                 | geht zurück bis zum ersten PC, Programmierung, frühe Hypertexte, Toolbook, Hypercard, heutzutage XML und TEI, auch Lehre | lange Erfahrung, "in der Szene des wissenschaftlichen Publizierens zuhause" (bez. auf elektronisches Publizieren) |                                | \I2-1\        |                                                                                                                                       |
| <b>BEDARFSKATEGORIEN</b>                                                                                        |                                                                                                                          |                                                                                                                   |                                |               |                                                                                                                                       |
| <b>K 1</b>                                                                                                      |                                                                                                                          |                                                                                                                   |                                |               |                                                                                                                                       |
| <b>Bedienbarkeit</b>                                                                                            |                                                                                                                          |                                                                                                                   |                                |               |                                                                                                                                       |
| <i>Benennung</i>                                                                                                | <i>Beschreibung</i>                                                                                                      | <i>Bewertung</i>                                                                                                  | <i>Bezug</i>                   | <i>Quelle</i> | <i>Reduktion</i>                                                                                                                      |
| selbst thematisiert                                                                                             | kennt den Eclipse-Editor aus Programmierung, in der Lehre eingesetzt, hat in Seminaren ediert                            | Eclipse vertraut, wie zuhause gefühlt, gute Vorkonfiguration, leichter Einstieg                                   | Produktion/Manipulation        | \I2-2\        | K 1.1d<br>mit mehr EDV-Erfahrung (z.B. mit Eclipse) schnell erlernbar und gut bedienbar<br><br><b>Benutzerführung / Erlernbarkeit</b> |
| selbst thematisiert                                                                                             | Kinderkrankheiten                                                                                                        | kein Problem                                                                                                      |                                | \I2-4\        | K 1.3a<br>Kinderkrankheiten sind normal, ist noch in der Entwicklung                                                                  |

## I2 Extraktion

|                                  |                                                                                                                                                            |                   |                         |               |                                                                                                                                                                                                                                                                       |
|----------------------------------|------------------------------------------------------------------------------------------------------------------------------------------------------------|-------------------|-------------------------|---------------|-----------------------------------------------------------------------------------------------------------------------------------------------------------------------------------------------------------------------------------------------------------------------|
|                                  |                                                                                                                                                            |                   |                         |               | <b>Systemstabilität,<br/>Programmierfehler</b>                                                                                                                                                                                                                        |
| vom Interviewer thematisiert     | Eclipse-Editor und Projektgruppen bekannt                                                                                                                  | ist ok            |                         | \I2-5\        | K 1.1d<br>mit mehr EDV-Erfahrung (z.B. mit Eclipse) schnell erlernbar und gut bedienbar<br><br><b>Benutzerführung /<br/>Erlernbarkeit</b>                                                                                                                             |
| <b>K 2<br/>Rezeption/Zugriff</b> |                                                                                                                                                            |                   |                         |               |                                                                                                                                                                                                                                                                       |
| <i>Benennung</i>                 | <i>Beschreibung</i>                                                                                                                                        | <i>Bewertung</i>  | <i>Bezug</i>            | <i>Quelle</i> | <i>Reduktion</i>                                                                                                                                                                                                                                                      |
| selbst thematisiert              | Zugriff auf Ressourcen, auch andere als Wörterbücher vorstellbar (beim ersten Workshop als Content im Vordergrund), Arbeit mit Quellen                     | spannend, positiv | Produktion/Manipulation | \I2-2\        | K 2.1a<br>kostenloser Zugriff auf unterschiedliche Repositorien bzw. Ressourcen (z.B. Wörterbücher), Quellen und Ausgaben/ Editionen, Vergleichsmöglichkeiten mit anderen Projekten/ Quellen, orts- und rechnerunabhängiger Zugriff<br><br><b>Zugriff auf Inhalte</b> |
| selbst thematisiert              | bei wachsender diversifizierter Datenmenge Browser, Suchmaschine, Darstellung: Worauf kann ich zugreifen?, ontologische Darstellung, evtl. Baum, Typen von | noch Krux         |                         | \I2-3\        | K 2.2b<br>Leichte Zugänglichkeit, Übersicht durch Browser, Suchmasken, Ontologien, Klassifizierungen, Indizierungen, Strukturierungen                                                                                                                                 |

## I2 Extraktion

|                     | Inhalten, Klassen von Quellen                                                                                                      |         |                         |        | <b>Zugriffsformen, Rezeptions- und Recherchemöglichkeiten</b>                                                                                                                                                                                                         |
|---------------------|------------------------------------------------------------------------------------------------------------------------------------|---------|-------------------------|--------|-----------------------------------------------------------------------------------------------------------------------------------------------------------------------------------------------------------------------------------------------------------------------|
| selbst thematisiert | Zugriff auf verschiedene Typen von Quellen: Editionen, Transkriptionen, Datenbanken, Repositorien, verschiedene Metadatenstandards | Wunsch  |                         | \I2-3\ | K 2.1a<br>kostenloser Zugriff auf unterschiedliche Repositorien bzw. Ressourcen (z.B. Wörterbücher), Quellen und Ausgaben/ Editionen, Vergleichsmöglichkeiten mit anderen Projekten/ Quellen, orts- und rechnerunabhängiger Zugriff<br><br><b>Zugriff auf Inhalte</b> |
| selbst thematisiert | zwei verschiedene Ausgaben vergleichen                                                                                             | Wunsch  | Produktion/Manipulation | \I2-3\ | K 2.1a<br>kostenloser Zugriff auf unterschiedliche Repositorien bzw. Ressourcen (z.B. Wörterbücher), Quellen und Ausgaben/ Editionen, Vergleichsmöglichkeiten mit anderen Projekten/ Quellen, orts- und rechnerunabhängiger Zugriff<br><br><b>Zugriff auf Inhalte</b> |
| selbst thematisiert | potenzielle Kostenersparnis der Verlage und Autoren, kommerzieller Schub, auch wenn erst Geld hineingesteckt wird                  | Wichtig |                         | \I2-9\ | K 2.1a<br>kostenloser Zugriff auf unterschiedliche Repositorien bzw. Ressourcen (z.B. Wörterbücher), Quellen und Ausgaben/ Editionen,                                                                                                                                 |

## I2 Extraktion

|                                                           |                                                                                                                                                                                |                            |                         |               |                                                                                                                                                                                                                                 |
|-----------------------------------------------------------|--------------------------------------------------------------------------------------------------------------------------------------------------------------------------------|----------------------------|-------------------------|---------------|---------------------------------------------------------------------------------------------------------------------------------------------------------------------------------------------------------------------------------|
|                                                           |                                                                                                                                                                                |                            |                         |               | Vergleichsmöglichkeiten mit anderen Projekten/ Quellen, orts- und rechnerunabhängiger Zugriff<br><br><b>Zugriff auf Inhalte</b>                                                                                                 |
| vom Interviewer thematisiert, vom Befragten konkretisiert | zusammenbinden von Inhalten in Ontologie- und SemanticWeb-Strukturen, z.B. durch Fachbibliotheken, die Metadaten so strukturiert anbieten, als nächstes den Inhalt gleich dazu | bedeutend, hohes Potenzial | Organisation/Verwaltung | \I2-13\       | K 2.2b<br>Leichte Zugänglichkeit, Übersicht durch Browser, Suchmasken, Ontologien, Klassifizierungen, Indizierungen, Strukturierungen<br><br><b>Zugriffsformen, Rezeptions- und Recherchemöglichkeiten</b>                      |
| <b>K 3<br/>Produktion/Manipulation</b>                    |                                                                                                                                                                                |                            |                         |               |                                                                                                                                                                                                                                 |
| <i>Benennung</i>                                          | <i>Beschreibung</i>                                                                                                                                                            | <i>Bewertung</i>           | <i>Bezug</i>            | <i>Quelle</i> | <i>Reduktion</i>                                                                                                                                                                                                                |
| selbst thematisiert                                       | kreative Ansätze, Wörterbücher zur Kollationierung nutzen, softwaregestützte Interpretationsansätze                                                                            | bedeutend                  |                         | \I2-10\       | K 3.2a<br>Verknüpfung von Tools, kreative Ansätze (z.B. Wörterbücher zur Kollationierung nutzen, Lemmatisierung mit Wörterbüchern verbinden), interdisziplinäre Ansätze<br><br><b>Analyse- und Visualisierungsmöglichkeiten</b> |

## I2 Extraktion

|                                  |                                             |                                                                                                                             |                           |               |                                                                                                                                                          |
|----------------------------------|---------------------------------------------|-----------------------------------------------------------------------------------------------------------------------------|---------------------------|---------------|----------------------------------------------------------------------------------------------------------------------------------------------------------|
| <b>K 4</b>                       |                                             |                                                                                                                             |                           |               |                                                                                                                                                          |
| <b>Modularität/Anpassbarkeit</b> |                                             |                                                                                                                             |                           |               |                                                                                                                                                          |
| <i>Benennung</i>                 | <i>Beschreibung</i>                         | <i>Bewertung</i>                                                                                                            | <i>Bezug</i>              | <i>Quelle</i> | <i>Reduktion</i>                                                                                                                                         |
| selbst thematisiert              | Editionen, an denen man weiterstricken kann | Wunsch                                                                                                                      | Produktion/Manipulation   | \I2-3\        | K 4.3b<br>erweiterbare/veränderbare Projekte/Objekte/Editionen<br><br><b>Inhalte</b>                                                                     |
| vom Interviewer thematisiert     | Konfiguration der Oberfläche                | unwichtig, je mehr man konfigurieren kann und muss, desto verwirrender, Gewöhnung an Programme normal, keine hohe Priorität | Bedienbarkeit             | \I2-8\        | K 4.1a<br>Anpassung der Oberflächenkonfiguration<br><br><b>TextGrid-Oberfläche / Umgebung</b>                                                            |
| selbst thematisiert              | Tools bereitstellen und modular einbauen    | Wird beflügeln                                                                                                              | Kollaboration/Kooperation | \I2-14\       | K 4.2a<br>Anschließbarkeit und Kombinierbarkeit von Tools und Services, auch von selbstentwickelten – modulares Konzept<br><br><b>Tools und Services</b> |
| <b>K 5</b>                       |                                             |                                                                                                                             |                           |               |                                                                                                                                                          |
| <b>Kollaboration/Kooperation</b> |                                             |                                                                                                                             |                           |               |                                                                                                                                                          |
| <i>Benennung</i>                 | <i>Beschreibung</i>                         | <i>Bewertung</i>                                                                                                            | <i>Bezug</i>              | <i>Quelle</i> | <i>Reduktion</i>                                                                                                                                         |
| selbst thematisiert              | verschiedene Metadatenstandards             | Wunsch                                                                                                                      | Produktion/Manipulation   | \I2-3\        | K 5.1d<br>Standards, TEI, Unabhängigkeit von Datenformaten<br><br><b>Austausch von Inhalten und Werkzeugen</b>                                           |

## I2 Extraktion

|                              |                                                                                                                                                                                                                                                          |                                                                   |                                               |         |                                                                                                                                                                                                                                                                                                                        |
|------------------------------|----------------------------------------------------------------------------------------------------------------------------------------------------------------------------------------------------------------------------------------------------------|-------------------------------------------------------------------|-----------------------------------------------|---------|------------------------------------------------------------------------------------------------------------------------------------------------------------------------------------------------------------------------------------------------------------------------------------------------------------------------|
| selbst thematisiert          | kollaboratives Arbeiten<br>i.S.v. nicht nochmal<br>abtippen, wenn es schon<br>eine Edition gibt<br>(Nachnutzung)                                                                                                                                         | stark im kommen                                                   | Produktion/Manipulation                       | \I2-10\ | K 5.1a<br>Austausch von Ressourcen,<br>Nachnutzung<br>und<br>K 5.1b<br>Austausch von Arbeits- bzw.<br>Forschungsergebnissen,<br>Bereitschaft dazu<br><br><b>Austausch von Inhalten und<br/>Werkzeugen</b>                                                                                                              |
| selbst thematisiert          | Prestigefrage, Angst vor<br>dem Ausufernden, Angst<br>davor, eigene Texte<br>herzugeben,<br>Ungewissheit, wer was<br>damit macht                                                                                                                         | steht der Entwicklung<br>entgegen, wird aber<br>abgedämpft werden | Organisation/Verwaltung                       | \I2-11\ | K 5.1a<br>Austausch von Ressourcen,<br>Nachnutzung<br><br><b>Austausch von Inhalten und<br/>Werkzeugen</b>                                                                                                                                                                                                             |
| vom Interviewer thematisiert | räumlich getrennt am<br>gleichen Gegenstand<br>arbeiten, Ergebnisse<br>"sharen", verteilte<br>Quellen und<br>Arbeitsstellen,<br>Ortsunabhängigkeit,<br>verteilttes Bearbeiten von<br>Schichten, z.B.<br>Volltexterschließung,<br>Transkription, Register | Wichtig, wird kommen                                              | Rezeption/Zugriff,<br>Produktion/Manipulation | \I2-12\ | K 5.1a<br>Austausch von Ressourcen,<br>Nachnutzung<br>und<br>K 5.1b<br>Austausch von Arbeits- bzw.<br>Forschungsergebnissen,<br>Bereitschaft dazu<br><b>Austausch von Inhalten und<br/>Werkzeugen</b><br>und<br>K 5.2a<br>Zusammenarbeit in Teams von<br>verschiedenen Orten aus, auch<br>an einem Dokument, verteilte |

## I2 Extraktion

|                                              |                                                                                                                                                           |                       |              |               |                                                                                                                                                                                                                                                                           |
|----------------------------------------------|-----------------------------------------------------------------------------------------------------------------------------------------------------------|-----------------------|--------------|---------------|---------------------------------------------------------------------------------------------------------------------------------------------------------------------------------------------------------------------------------------------------------------------------|
|                                              |                                                                                                                                                           |                       |              |               | Bearbeitung verschiedener<br>'Schichten' eines Dokuments<br>usw.<br><b>Zusammenarbeit</b>                                                                                                                                                                                 |
| selbst thematisiert                          | Standards wie XML und<br>TEI ermöglichen<br>Plattformunabhängigkeit,<br>Offenheit,<br>Communitybuilding,<br>Mitbestimmung, Teilen<br>von Texten und Tools | neu und lobenswert    |              | \I2-15\       | K 5.1a<br>Austausch von Ressourcen,<br>Nachnutzung<br>und<br>K 5.1c<br>Austausch von Arbeitsmitteln<br>(Tools, Formaten, Skripten<br>usw.)<br>und<br>K 5.1d<br>Standards, TEI,<br>Unabhängigkeit von<br>Datenformaten<br><b>Austausch von Inhalten und<br/>Werkzeugen</b> |
| selbst thematisiert                          | Unsicherheit über<br>Projekte, die das nutzen,<br>Abhängigkeit von der<br>Nutzung/Partizipation,<br>Finanzierungsaspekt                                   | Unsicherheitsfaktor   |              | \I2-16\       | K 5.3a<br>Partizipation/Nutzung als<br>Voraussetzung<br><br><b>Community-Building-<br/>Aspekte</b>                                                                                                                                                                        |
| <b>K 6</b><br><b>Organisation/Verwaltung</b> |                                                                                                                                                           |                       |              |               |                                                                                                                                                                                                                                                                           |
| <i>Benennung</i>                             | <i>Beschreibung</i>                                                                                                                                       | <i>Bewertung</i>      | <i>Bezug</i> | <i>Quelle</i> | <i>Reduktion</i>                                                                                                                                                                                                                                                          |
| selbst thematisiert                          | Intransparenz bei der<br>Datenspeicherung                                                                                                                 | beunruhigend, störend |              | \I2-4\        | K 6.1b<br>Datenspeicherung und<br>-verwaltung,<br>Langzeitarchivierung,                                                                                                                                                                                                   |

## I2 Extraktion

|                                                      |                                                                                                                                                           |                                                         |               |        |                                                                                                                                                                                                     |
|------------------------------------------------------|-----------------------------------------------------------------------------------------------------------------------------------------------------------|---------------------------------------------------------|---------------|--------|-----------------------------------------------------------------------------------------------------------------------------------------------------------------------------------------------------|
|                                                      |                                                                                                                                                           |                                                         |               |        | verbunden mit<br>Bearbeitungsmöglichkeiten<br>und Nachnutzung<br><br><b>Organisation und<br/>Verwaltung von Inhalten</b>                                                                            |
| selbst thematisiert, vom<br>Interviewer aufgegriffen | Navigationsleiste gaukelt<br>Datenorte vor, Anzeige,<br>wo Daten repliziert und<br>synchronisiert sind,<br>Browser für eigene Daten<br>mit Ablegestruktur | zu intransparent,<br>verbesserungswürdig                | Bedienbarkeit | \I2-6\ | K 6.1b<br>Datenspeicherung und<br>-verwaltung,<br>Langzeitarchivierung,<br>verbunden mit<br>Bearbeitungsmöglichkeiten<br>und Nachnutzung<br><br><b>Organisation und<br/>Verwaltung von Inhalten</b> |
| selbst thematisiert                                  | TextGrid-Metadaten zum<br>Ablegen der Projekte auf<br>dem Knoten, tauchen<br>nicht im Dokument auf,<br>kein Header-Platz                                  | zu wenig transparent,<br>Begrifflichkeit<br>undeutlich, | Bedienbarkeit | \I2-7\ | K 6.1b<br>Datenspeicherung und<br>-verwaltung,<br>Langzeitarchivierung,<br>verbunden mit<br>Bearbeitungsmöglichkeiten<br>und Nachnutzung<br><br><b>Organisation und<br/>Verwaltung von Inhalten</b> |
