# Supplementary material
Source: publisher site journal article supplement (https://www.degruyterbrill.com/publication/isbn/9783110463927/downloadAsset/9783110463927_Extraktionen_Reduktionen_fallbezogen.zip)
Supplement: Supplementary file 13 [file I20 Extraktion und Reduktion.pdf › fallbezogene Extraktionen und Reduktionen/I20 Extraktion und Reduktion.pdf]

## I20 Extraktion

|                                                                           |                                                                                                                                                                |                                                                                            |                                               |               |                                                                                                                   |
|---------------------------------------------------------------------------|----------------------------------------------------------------------------------------------------------------------------------------------------------------|--------------------------------------------------------------------------------------------|-----------------------------------------------|---------------|-------------------------------------------------------------------------------------------------------------------|
| <b>TÄTIGKEITEN UND EDV-ERFAHRUNG</b>                                      |                                                                                                                                                                |                                                                                            |                                               |               |                                                                                                                   |
| <b>Tätigkeiten</b>                                                        |                                                                                                                                                                |                                                                                            |                                               |               |                                                                                                                   |
| <i>Gegenstände</i>                                                        | <i>Methoden/Verfahren</i>                                                                                                                                      | <i>Ziele/Fragen</i>                                                                        | <i>Institutioneller Rahmen</i>                | <i>Quelle</i> |                                                                                                                   |
| Werk, Briefe                                                              | überlieferungsadäquat darstellen, genetische Forschungsansätze betreiben                                                                                       | überlieferungsadäquate Darstellung, genetische Erkenntnisse                                | Universität, Forschungs- bzw. Editionsprojekt | \I20-1\       |                                                                                                                   |
| Editionen, vor allem Briefeditionen, Hauptherausgeberin einer Werkausgabe | bisher traditionell, historisch-kritisch Edieren, weniger Anforderungen an die Textkonstitution, oft Drucke zugrunde gelegt, bei Briefen wenig Überarbeitungen | Ziel Studienausgabe, historisch-kritische Ausgabe, Buch mit ausführlichem Stellenkommentar | Universität, Forschungs- bzw. Editionsprojekt | \I20-3\       |                                                                                                                   |
| <b>Erfahrung</b>                                                          |                                                                                                                                                                |                                                                                            |                                               |               |                                                                                                                   |
|                                                                           | <i>Beschreibung</i>                                                                                                                                            | <i>Bewertung</i>                                                                           |                                               | <i>Quelle</i> |                                                                                                                   |
|                                                                           | "mit dem Computer gearbeitet", einfache Internetseite gemacht                                                                                                  | Computer- und Internetnutzung, TEI und XML nur theoretisch-methodische Erfahrung           |                                               | \I20-1\       |                                                                                                                   |
|                                                                           | Computer nur als Hilfsmittel für die Buchedition                                                                                                               |                                                                                            |                                               | \I20-3\       |                                                                                                                   |
| <b>BEDARFSKATEGORIEN</b>                                                  |                                                                                                                                                                |                                                                                            |                                               |               |                                                                                                                   |
| <b>K 1</b>                                                                |                                                                                                                                                                |                                                                                            |                                               |               |                                                                                                                   |
| <b>Bedienbarkeit</b>                                                      |                                                                                                                                                                |                                                                                            |                                               |               |                                                                                                                   |
| <i>Benennung</i>                                                          | <i>Beschreibung</i>                                                                                                                                            | <i>Bewertung</i>                                                                           | <i>Bezug</i>                                  | <i>Quelle</i> | <i>Reduktion</i>                                                                                                  |
| selbst thematisiert                                                       | nicht zu viele Informationen auf einmal im Workshop, man muss sich damit nach und nach beschäftigen                                                            | nicht zu viel --> gelungen, zufrieden                                                      |                                               | \I20-5\       | K 1.1g<br>Schulungen für technisch weniger versierte Nutzer, Schritt-für-Schritt-Anleitung, Heranführen/Einbinden |

## I20 Extraktion

|                              |                                                                                 |                                                                                                                                                                                                                          |                         |          |                                                                                                                                                                                                                                                                                                                                                                                                                |
|------------------------------|---------------------------------------------------------------------------------|--------------------------------------------------------------------------------------------------------------------------------------------------------------------------------------------------------------------------|-------------------------|----------|----------------------------------------------------------------------------------------------------------------------------------------------------------------------------------------------------------------------------------------------------------------------------------------------------------------------------------------------------------------------------------------------------------------|
|                              |                                                                                 |                                                                                                                                                                                                                          |                         |          | der Community,<br>didaktischer Prozess,<br>Mehrwerte vermitteln,<br>Testprojekte<br><br><b>Benutzerführung /<br/>Erlernbarkeit</b>                                                                                                                                                                                                                                                                             |
| selbst thematisiert          | Einarbeitung in TEI                                                             | hätte gehofft, beim<br>Workshop etwas mehr<br>zu erfahren, großen<br>Respekt vor TEI,<br>Nutzen aber so groß,<br>dass man es auf sich<br>nimmt, Eingabe wie in<br>Word und<br>Konvertierung würde<br>ich aber bevorzugen | Produktion/Manipulation | \I20-8\  | K 1.1f<br>bereit, in das Erlernen von<br>Programmen zu<br>investieren, die viel<br>können, in anspruchsvolle<br>Ergebnisse<br><br><b>Benutzerführung /<br/>Erlernbarkeit</b><br><br>und<br><br>K 1.4b<br>Arbeiten wie in der<br>„normalen“<br>Textverarbeitung<br>ermöglichen, Vermeidung<br>von spitzen Klammern,<br>XML-Generierung im<br>Hintergrund<br><br><b>Bedienbarkeit der<br/>Auszeichnungsebene</b> |
| vom Interviewer thematisiert | auf den ersten Blick sehr<br>viele Felder, aber wenn<br>man sich etwas vertraut | nichts negatives<br>aufgefallen                                                                                                                                                                                          | Produktion/Manipulation | \I20-11\ | K 1.1e<br>anfangs steile Lernkurve,<br>Einarbeitung notwendig,                                                                                                                                                                                                                                                                                                                                                 |

## I20 Extraktion

|                     |                                                                                                              |                                                                  |                         |          |                                                                                                                                                                                                                                                                                                                                                                                                               |
|---------------------|--------------------------------------------------------------------------------------------------------------|------------------------------------------------------------------|-------------------------|----------|---------------------------------------------------------------------------------------------------------------------------------------------------------------------------------------------------------------------------------------------------------------------------------------------------------------------------------------------------------------------------------------------------------------|
|                     | gemacht hat und etwas Vorbildung mit Internet und Textverarbeitung hat, kann man sich schon vorwärts klicken |                                                                  |                         |          | <p>danach gut (z.B. bzgl. unterschiedlicher Navigations- und Bedienungs-möglichkeiten für dasselbe Ziel, menulastig)</p> <p><b>Benutzerführung / Erlernbarkeit</b></p> <p>und</p> <p>K 1.2c<br/>Zurechtfinden, Komponenten und Sichten zuordnen ist am Anfang schwierig (evtl. gewohnte Website- und Ordnerstrukturierung besser)</p> <p><b>Orientierung / Übersichtlichkeit / Oberflächen-Gestaltung</b></p> |
| selbst thematisiert | Auseinandersetzung mit XML und TEI                                                                           | größte Barriere, Nutzen aber so groß, dass ich sie in Kauf nehme | Produktion/Manipulation | \I20-16\ | <p>K 1.1f<br/>bereit, in das Erlernen von Programmen zu investieren, die viel können, in anspruchsvolle Ergebnisse</p> <p><b>Benutzerführung / Erlernbarkeit</b></p>                                                                                                                                                                                                                                          |

## I20 Extraktion

|                                                           |                                                                                                                                 |                        |                         |               |                                                                                                                                                                                                                                                                       |
|-----------------------------------------------------------|---------------------------------------------------------------------------------------------------------------------------------|------------------------|-------------------------|---------------|-----------------------------------------------------------------------------------------------------------------------------------------------------------------------------------------------------------------------------------------------------------------------|
|                                                           |                                                                                                                                 |                        |                         |               |                                                                                                                                                                                                                                                                       |
| <b>K 2</b>                                                |                                                                                                                                 |                        |                         |               |                                                                                                                                                                                                                                                                       |
| <b>Rezeption/Zugriff</b>                                  |                                                                                                                                 |                        |                         |               |                                                                                                                                                                                                                                                                       |
| <i>Benennung</i>                                          | <i>Beschreibung</i>                                                                                                             | <i>Bewertung</i>       | <i>Bezug</i>            | <i>Quelle</i> | <i>Reduktion</i>                                                                                                                                                                                                                                                      |
| vom Interviewer thematisiert, vom Befragten konkretisiert | Zugriff auf Wörterbücher und Textausgaben                                                                                       | große Vorteil          |                         | \I20-6\       | K 2.1a<br>kostenloser Zugriff auf unterschiedliche Repositorien bzw. Ressourcen (z.B. Wörterbücher), Quellen und Ausgaben/ Editionen, Vergleichsmöglichkeiten mit anderen Projekten/ Quellen, orts- und rechnerunabhängiger Zugriff<br><br><b>Zugriff auf Inhalte</b> |
| selbst thematisiert                                       | Produktiver Zugriff auf Textressourcen: zitieren, verknüpfen, transkribieren, abschreiben bzw. kopieren,                        | sehr interessiert      | Produktion/Manipulation | \I20-9\       | K 2.1c<br>nicht rein rezeptiver, sondern auch produktiver, „schreibender“ Zugriff, auch in der eigenen Forschungsumgebung, auch auf den Quellcode<br><br><b>Zugriff auf Inhalte</b>                                                                                   |
| selbst thematisiert                                       | Zugriff auf Wörterbücher, historische Werke, Zeno-Bibliothek, allerdings Brauchbarkeit der Ausgaben bzw. Auflagen zu überprüfen | interessiert mich sehr | Produktion/Manipulation | \I20-9\       | K 2.1a<br>kostenloser Zugriff auf unterschiedliche Repositorien bzw. Ressourcen (z.B. Wörterbücher), Quellen                                                                                                                                                          |

## I20 Extraktion

|                                        |                                                                                                                     |                          |                           |               |                                                                                                                                                                                                                                                                                      |
|----------------------------------------|---------------------------------------------------------------------------------------------------------------------|--------------------------|---------------------------|---------------|--------------------------------------------------------------------------------------------------------------------------------------------------------------------------------------------------------------------------------------------------------------------------------------|
|                                        |                                                                                                                     |                          |                           |               | und Ausgaben/ Editionen, Vergleichsmöglichkeiten mit anderen Projekten/ Quellen, orts- und rechnerunabhängiger Zugriff<br><br><b>Zugriff auf Inhalte</b>                                                                                                                             |
| selbst thematisiert                    | sehen, was andere forschen, ähnlich Arbeiten vergleichen                                                            | besonderer Vorteil       | Kollaboration/Kooperation | \I20-14\      | K 2.1b<br>Kostenloser Zugriff auf maschinell verarbeitete Daten und Forschungsergebnisse<br><br><b>Zugriff auf Inhalte</b>                                                                                                                                                           |
| <b>K 3<br/>Produktion/Manipulation</b> |                                                                                                                     |                          |                           |               |                                                                                                                                                                                                                                                                                      |
| <i>Benennung</i>                       | <i>Beschreibung</i>                                                                                                 | <i>Bewertung</i>         | <i>Bezug</i>              | <i>Quelle</i> | <i>Reduktion</i>                                                                                                                                                                                                                                                                     |
| selbst thematisiert                    | mehr Möglichkeiten als die traditionelle Buchform, genetische Forschungsansätze, überlieferungsadäquate Darstellung | sieht mögliche Mehrwerte |                           | \I20-1\       | K 3.2b<br>Unterschiede durch Textvergleich (Kollationierung, TBLE) visualisieren, Schreiberhände vergleichen, Textgenese, Entwicklungsprozess rekonstruieren und darstellen, Schichten und Räumlichkeit darstellen, multiperspektivischen Zugang schaffen<br><br><b>Analyse- und</b> |

|                     |                                                                                                                                                                                                                                                                                   |        |                   |         | <b>Visualisierungs-<br/>möglichkeiten</b>                                                                                                                                                                                                                                                                                                                                                                                                                                                                                                                |
|---------------------|-----------------------------------------------------------------------------------------------------------------------------------------------------------------------------------------------------------------------------------------------------------------------------------|--------|-------------------|---------|----------------------------------------------------------------------------------------------------------------------------------------------------------------------------------------------------------------------------------------------------------------------------------------------------------------------------------------------------------------------------------------------------------------------------------------------------------------------------------------------------------------------------------------------------------|
| selbst thematisiert | genaue Transkription, Digitalisate daneben stellen, einzelne Textschichten elektronisch herausfiltern, miteinander verknüpfen, Genese rekonstruieren, also Grundschrift, Überarbeitungen, Hinzufügungen, Streichungen, transparent machen für Benutzer zur eigenen Rekonstruktion | Wunsch | Rezeption/Zugriff | \I20-2\ | <p>K 3.2b<br/>Unterschiede durch Textvergleich (Kollationierung, TBLE) visualisieren, Schreiberhände vergleichen, Textgenese, Entwicklungsprozess rekonstruieren und darstellen, Schichten und Räumlichkeit darstellen, multiperspektivischen Zugang schaffen</p> <p><b>Analyse- und Visualisierungs-<br/>möglichkeiten</b></p> <p>und</p> <p>K 3.3a<br/>Verknüpfungsmöglichkeiten Text-Text (z.B. editionswiss. Kommentarfunktionen, Varianten verknüpfen, Apparat, Quellen/Referenzen, Register, Wörterbücher, Briefe)</p> <p><b>Verknüpfungs-</b></p> |

## I20 Extraktion

|                                                           |                                                                                                                  |                        |                   |         |                                                                                                                                                                                                                                                                                                |
|-----------------------------------------------------------|------------------------------------------------------------------------------------------------------------------|------------------------|-------------------|---------|------------------------------------------------------------------------------------------------------------------------------------------------------------------------------------------------------------------------------------------------------------------------------------------------|
|                                                           |                                                                                                                  |                        |                   |         | <b>möglichkeiten und deren Visualisierung</b>                                                                                                                                                                                                                                                  |
| selbst thematisiert                                       | kostenloser Zugriff auf Tools                                                                                    | Mehrwert               | Rezeption/Zugriff | \I20-4\ |                                                                                                                                                                                                                                                                                                |
| Vom Interviewer thematisiert, vom Befragten konkretisiert | in der Kommentierung Verknüpfungen mit Textausgaben und Wörterbüchern erstellen                                  | großer Vorteil         |                   | \I20-6\ | K 3.3a<br>Verknüpfungsmöglichkeiten Text-Text (z.B. editionswiss. Kommentarfunktionen, Varianten verknüpfen, Apparat, Quellen/Referenzen, Register, Wörterbücher, Briefe)<br><br><b>Verknüpfungsmöglichkeiten und deren Visualisierung</b>                                                     |
| selbst thematisiert                                       | Konvertierung in TEI, Schema-Definitionen und Formate muss man vorher festlegen, wäre wie in Word aber einfacher | wäre weitaus einfacher | Bedienbarkeit     | \I20-8\ | K 3.1b<br>XML-Auszeichnungs- bzw. Produktionshilfe, Tools zur digitalen Herstellung und Verfügbarmachung von Texten, XML-Schemata vorgefertigt für verschiedene individuelle Bedürfnisse, Konvertierung in XML/TEI, Baseline Encoding, Streaming Editor, Unterstützung bei zunächst geringerer |

## I20 Extraktion

|                     |                                                                                                                                   |                                                             |                   |          |                                                                                                                                                                                                                                            |
|---------------------|-----------------------------------------------------------------------------------------------------------------------------------|-------------------------------------------------------------|-------------------|----------|--------------------------------------------------------------------------------------------------------------------------------------------------------------------------------------------------------------------------------------------|
|                     |                                                                                                                                   |                                                             |                   |          | Auszeichnungstiefe<br><b>XML-Produktion</b>                                                                                                                                                                                                |
| selbst thematisiert | Textressourcen zitieren, verknüpfen, transkribieren, abschreiben bzw. kopieren,                                                   | sehr interessiert                                           | Rezeption/Zugriff | \I20-9\  | K 3.3a<br>Verknüpfungsmöglichkeiten Text-Text (z.B. editionswiss. Kommentarfunktionen, Varianten verknüpfen, Apparat, Quellen/Referenzen, Register, Wörterbücher, Briefe)<br><br><b>Verknüpfungsmöglichkeiten und deren Visualisierung</b> |
| selbst thematisiert | Möglichkeiten für die Kommentierungsarbeit, Textdarstellung, Textkritik, textkritischer Apparat, Register anlegen, Lemmatisierung | beim Workshop mehr drauf eingehen, betrifft viele Editoren, |                   | \I20-10\ | K 3.3a<br>Verknüpfungsmöglichkeiten Text-Text (z.B. editionswiss. Kommentarfunktionen, Varianten verknüpfen, Apparat, Quellen/Referenzen, Register, Wörterbücher, Briefe)<br><br><b>Verknüpfungsmöglichkeiten und deren Visualisierung</b> |
| selbst thematisiert | bessere                                                                                                                           | großes Potenzial,                                           | Rezeption/Zugriff | \I20-13\ | K 3.2b                                                                                                                                                                                                                                     |



## I20 Extraktion

|                                                |                                                                                                                                                                                                                                                                                                                                                                                                                                                                 |                                    |                         |               |                                                                                                                                                                                                                                                                                                         |
|------------------------------------------------|-----------------------------------------------------------------------------------------------------------------------------------------------------------------------------------------------------------------------------------------------------------------------------------------------------------------------------------------------------------------------------------------------------------------------------------------------------------------|------------------------------------|-------------------------|---------------|---------------------------------------------------------------------------------------------------------------------------------------------------------------------------------------------------------------------------------------------------------------------------------------------------------|
|                                                | Darstellungsmöglichkeiten des Textes durch elektronische Unterstützung, genetische Spuren darstellen, die beim traditionellen Edieren evtl. nicht beachtet bzw. verwischt werden, Darstellung der räumlichen Verhältnisse, der Schichten im Text, genauere Darstellung alles Sichtbaren, verschiedene Streichungsarten z.B., durch zu glatte Textaufbereitung geht vieles verloren, viel mehr Möglichkeiten für den Benutzer erzeugen, mit dem Text zu arbeiten | Mehrwert, neue Möglichkeiten       |                         |               | Unterschiede durch Textvergleich (Kollationierung, TBLE) visualisieren, Schreiberhände vergleichen, Textgenese, Entwicklungsprozess rekonstruieren und darstellen, Schichten und Räumlichkeit darstellen, multiperspektivischen Zugang schaffen<br><br><b>Analyse- und Visualisierungsmöglichkeiten</b> |
| selbst thematisiert                            | kostenloser Zugriff auf Tools                                                                                                                                                                                                                                                                                                                                                                                                                                   | entscheidender Fortschritt/Vorteil |                         | \I20-16\      | K 3.4a<br>Arbeitsumgebung mit Tool-Angebot, nicht alles neu /selbst programmieren, kostenlos<br><br><b>Produktionsunterstützung allgemein</b>                                                                                                                                                           |
| <b>K 4</b><br><b>Modularität/Anpassbarkeit</b> |                                                                                                                                                                                                                                                                                                                                                                                                                                                                 |                                    |                         |               |                                                                                                                                                                                                                                                                                                         |
| <i>Benennung</i>                               | <i>Beschreibung</i>                                                                                                                                                                                                                                                                                                                                                                                                                                             | <i>Bewertung</i>                   | <i>Bezug</i>            | <i>Quelle</i> | <i>Reduktion</i>                                                                                                                                                                                                                                                                                        |
| selbst thematisiert                            | Schemata individuell anpassen                                                                                                                                                                                                                                                                                                                                                                                                                                   | sehr sinnvoll                      | Produktion/Manipulation | \I20-8\       | K 4.3c<br>Schemata und Metadaten- bzw. Auszeichnungs-                                                                                                                                                                                                                                                   |

## I20 Extraktion

|                                                           |                                                                                                                                                                                                                                                                  |                                                                       |                                            |               |                                                                                                                          |
|-----------------------------------------------------------|------------------------------------------------------------------------------------------------------------------------------------------------------------------------------------------------------------------------------------------------------------------|-----------------------------------------------------------------------|--------------------------------------------|---------------|--------------------------------------------------------------------------------------------------------------------------|
|                                                           |                                                                                                                                                                                                                                                                  |                                                                       |                                            |               | Konzepte anpassen/nachnutzen und eigene einbinden<br><b>Inhalte</b>                                                      |
| selbst thematisiert                                       | Ausbaufähigkeit, mehr Inhalte sollen eingebracht werden                                                                                                                                                                                                          | interessiert mich sehr                                                | Produktion/Manipulation, Rezeption/Zugriff | \I20-9\       | K 4.3a<br>Anschließbarkeit/<br>Nachnutzung von Ressourcen, Formate mappen<br><b>Inhalte</b>                              |
| vom Interviewer thematisiert, vom Befragten konkretisiert | Nachnutzbarkeit besonderer Auszeichnungen, Bsp. Notizbücher, ausgerissene/aufgeklebte Seiten, Differenzierung/Modifizierung bestehender Formen, oft werden erst im Laufe eines Projekts alle Anforderungen an die Auszeichnung klar, flexibel gestaltetes System | kommt mir sehr entgegen, Flexibilität sehr gut für editorische Arbeit | Produktion/Manipulation                    | \I20-12\      | K 4.3c<br>Schemata und Metadaten- bzw. Auszeichnungs-Konzepte anpassen/nachnutzen und eigene einbinden<br><b>Inhalte</b> |
| <b>K 5</b><br><b>Kollaboration/Kooperation</b>            |                                                                                                                                                                                                                                                                  |                                                                       |                                            |               |                                                                                                                          |
| <i>Benennung</i>                                          | <i>Beschreibung</i>                                                                                                                                                                                                                                              | <i>Bewertung</i>                                                      | <i>Bezug</i>                               | <i>Quelle</i> | <i>Reduktion</i>                                                                                                         |
| selbst thematisiert                                       | Kollaboration, Vernetzung mit den richtigen Leuten, Interdisziplinarität, z.B. ähnliche Probleme in Germanistik und                                                                                                                                              | schwierig zu bekommen, sehr wichtig                                   | Produktion/Manipulation                    | \I20-4\       | K 5.2c<br>Interdisziplinäre Zusammenarbeit<br><b>Zusammenarbeit</b>                                                      |

## I20 Extraktion

|                                                           |                                                                                                                                                                                                                                                                                                                                                                                                                                                                                |                                                                                     |                                            |         |                                                                                                                                                                                          |
|-----------------------------------------------------------|--------------------------------------------------------------------------------------------------------------------------------------------------------------------------------------------------------------------------------------------------------------------------------------------------------------------------------------------------------------------------------------------------------------------------------------------------------------------------------|-------------------------------------------------------------------------------------|--------------------------------------------|---------|------------------------------------------------------------------------------------------------------------------------------------------------------------------------------------------|
|                                                           | Kunstgeschichte, Bsp. Künstlernoteizbücher mit Zeichnungen                                                                                                                                                                                                                                                                                                                                                                                                                     |                                                                                     |                                            |         |                                                                                                                                                                                          |
| vom Interviewer thematisiert, vom Befragten konkretisiert | Online-Kollaboration in einem Projekt, hatten wir auf anderen Gebieten auch schon als Zusammenarbeit an einer Universität, effizienterer und effektiverer Austausch über eine Forschungsplattform                                                                                                                                                                                                                                                                              | könnte mir vorstellen, dass das wichtig ist, Effizienz- und Effektivitätssteigerung | Produktion/Manipulation                    | \I20-7\ | K 5.2a<br>Zusammenarbeit in Teams von verschiedenen Orten aus, auch an einem Dokument, verteilte Bearbeitung verschiedener ‚Schichten‘ eines Dokuments usw.<br><br><b>Zusammenarbeit</b> |
| selbst thematisiert                                       | auch in andere Projekte über die Forschungsplattform reinschauen, über ähnliche editorische Probleme informieren, verschiedene Transkriptions- und Kommentierungsformen, vielleicht gemeinsam lösen, Orientierung und Austausch, bislang über Mail/ Internet/ Telefon/ Treffen, es gibt andere Plattformen für dezentrale Zusammenarbeit z.B. vom Rechenzentrum der Akademie: Digitalisate, Transkriptionen, Register anlegen, Kommentarvorbereitung, definierte Zugänge, aber | möglicher Nutzen                                                                    | Produktion/Manipulation, Rezeption/Zugriff | \I20-7\ | K 5.1c<br>Austausch von Arbeitsmitteln (Tools, Formaten, Skripten usw.)<br><br><b>Austausch von Inhalten und Werkzeugen</b>                                                              |

## I20 Extraktion

|                     |                                                                                                                                                                                                                                                                    |                                    |                                          |          |                                                                                                                                                                                                                                                                                                           |
|---------------------|--------------------------------------------------------------------------------------------------------------------------------------------------------------------------------------------------------------------------------------------------------------------|------------------------------------|------------------------------------------|----------|-----------------------------------------------------------------------------------------------------------------------------------------------------------------------------------------------------------------------------------------------------------------------------------------------------------|
|                     | nicht so groß angelegt wie TG                                                                                                                                                                                                                                      |                                    |                                          |          |                                                                                                                                                                                                                                                                                                           |
| selbst thematisiert | Zusammenarbeit mit Entwicklern und Informatikern, unvorhergesehene Dinge können passieren, Hilfen für individuelle Schemata Ballast abgeben                                                                                                                        | sehr sinnvoll                      | Bedienbarkeit, Modularität/Anpassbarkeit | \I20-8\  | <p>K 5.1c<br/>Austausch von Arbeitsmitteln (Tools, Formaten, Skripten usw.)</p> <p><b>Austausch von Inhalten und Werkzeugen</b></p> <p>K 5.2b<br/>Zusammenarbeit zwischen Institutionen, Projekten, auch intern zwischen verschiedenen Stellen, mit Technikern, Workflow</p> <p><b>Zusammenarbeit</b></p> |
| selbst thematisiert | interdisziplinärer Austausch, ähnliche Arbeitsweisen von Künstlern über die Disziplin hinaus feststellen, auch diachron, sich über Theorien austauschen, sehen, was andere forschen, die eigene Arbeit kritisch in anderen Kontexten sehen oder ähnliche Arbeiten, | besonderer Vorteil                 | Rezeption/Zugriff                        | \I20-14\ | <p>K 5.2c<br/>Interdisziplinäre Zusammenarbeit</p> <p><b>Zusammenarbeit</b></p>                                                                                                                                                                                                                           |
| selbst thematisiert | Austausch mit Wissenschaftlern                                                                                                                                                                                                                                     | entscheidender Fortschritt/Vorteil | Rezeption/Zugriff                        | \I20-16\ | <p>K 5.3d<br/>Kommunikationsplattform, Social-Anwendungen</p>                                                                                                                                                                                                                                             |

|                                                           |                                                                                                                                                                                                                                                                                                                                                          |                               |                   |               |                                                                                                                                                                                  |
|-----------------------------------------------------------|----------------------------------------------------------------------------------------------------------------------------------------------------------------------------------------------------------------------------------------------------------------------------------------------------------------------------------------------------------|-------------------------------|-------------------|---------------|----------------------------------------------------------------------------------------------------------------------------------------------------------------------------------|
|                                                           |                                                                                                                                                                                                                                                                                                                                                          |                               |                   |               | <b>Community-Building-Aspekte</b>                                                                                                                                                |
| <b>K 6<br/>Organisation/Verwaltung</b>                    |                                                                                                                                                                                                                                                                                                                                                          |                               |                   |               |                                                                                                                                                                                  |
| <i>Benennung</i>                                          | <i>Beschreibung</i>                                                                                                                                                                                                                                                                                                                                      | <i>Bewertung</i>              | <i>Bezug</i>      | <i>Quelle</i> | <i>Reduktion</i>                                                                                                                                                                 |
| vom Interviewer thematisiert, vom Befragten konkretisiert | Kurzexposé für Projekte, knapp skizzieren, was man macht, was das Anliegen ist, damit Nutzer sehen können, ob es relevant für sie ist, weil jeder Unmengen Material zu bewältigen hat, Gesamtübersicht an Projekten, Kontaktpersonen angeben, Möglichkeit, nur manches freizugeben wegen Datenklau-Gefahr, nicht in der Entstehungsphase sichtbar machen | ganz wichtig                  | Rezeption/Zugriff | \I20-15\      | K 6.1d<br>Eigene Sichtbarkeit, Publikations-Möglichkeit<br><br><b>Organisation und Verwaltung von Inhalten</b>                                                                   |
| selbst thematisiert                                       | Nachhaltigkeit, Langzeitarchivierung, Probleme der Kompatibilität, Institutionen/Server fallen aus usw.                                                                                                                                                                                                                                                  | ganz wichtiger Punkt, Vorteil |                   | \I20-16\      | K 6.1b<br>Datenspeicherung und –verwaltung, Langzeitarchivierung, verbunden mit Bearbeitungsmöglichkeiten und Nachnutzung<br><br><b>Organisation und Verwaltung von Inhalten</b> |
