# Supplementary material
Source: publisher site journal article supplement (https://www.degruyterbrill.com/publication/isbn/9783110463927/downloadAsset/9783110463927_Extraktionen_Reduktionen_fallbezogen.zip)
Supplement: Supplementary file 14 [file I21 Extraktion und Reduktion.pdf › fallbezogene Extraktionen und Reduktionen/I21 Extraktion und Reduktion.pdf]

## I21 Extraktion

| <b>TÄTIGKEITEN UND EDV-ERFAHRUNG</b>                                                      |                                                                                                                                                                                                                              |                                                                           |                                                                     |               |                                                                                                                                                                                                                        |
|-------------------------------------------------------------------------------------------|------------------------------------------------------------------------------------------------------------------------------------------------------------------------------------------------------------------------------|---------------------------------------------------------------------------|---------------------------------------------------------------------|---------------|------------------------------------------------------------------------------------------------------------------------------------------------------------------------------------------------------------------------|
| <b>Tätigkeiten</b>                                                                        |                                                                                                                                                                                                                              |                                                                           |                                                                     |               |                                                                                                                                                                                                                        |
| <i>Gegenstände</i>                                                                        | <i>Methoden/Verfahren</i>                                                                                                                                                                                                    | <i>Ziele/Fragen</i>                                                       | <i>Institutioneller Rahmen</i>                                      | <i>Quelle</i> |                                                                                                                                                                                                                        |
| digitale Editionen, umfangreiches Korpus, umfangreicher Nachlass eines bedeutenden Autors | seit 1985 computergestütztes Edieren, Transkription und Verwaltung, ab 1988 auch elektronische Publikation                                                                                                                   | Zunächst Buchpublikation, ab 88 elektronische Publikation                 | Universität, Forschungsstelle, Arbeitsstelle für digitale Editionen | \I21-1\       |                                                                                                                                                                                                                        |
| <b>Erfahrung</b>                                                                          |                                                                                                                                                                                                                              |                                                                           |                                                                     |               |                                                                                                                                                                                                                        |
|                                                                                           | <i>Beschreibung</i>                                                                                                                                                                                                          | <i>Bewertung</i>                                                          |                                                                     | <i>Quelle</i> |                                                                                                                                                                                                                        |
|                                                                                           | ab 1985 zunächst Computer als Schreibinstrument, ab 1988 auch elektronische Publikation, 1992 erste CD-Version mit Transkriptionen, alles auf DOS abgestimmt bis zur Einführung von Windows 95, danach Folio Views bis jetzt | lange mit EDV befasst --> Erfahrung im Bereich elektronisches Publizieren |                                                                     | \I21-1\       |                                                                                                                                                                                                                        |
|                                                                                           | XML als Zielformat                                                                                                                                                                                                           | noch wenig Erfahrung                                                      |                                                                     | \I21-3\       |                                                                                                                                                                                                                        |
| <b>BEDARFSKATEGORIEN</b>                                                                  |                                                                                                                                                                                                                              |                                                                           |                                                                     |               |                                                                                                                                                                                                                        |
| <b>K 1 Bedienbarkeit</b>                                                                  |                                                                                                                                                                                                                              |                                                                           |                                                                     |               |                                                                                                                                                                                                                        |
| <i>Benennung</i>                                                                          | <i>Beschreibung</i>                                                                                                                                                                                                          | <i>Bewertung</i>                                                          | <i>Bezug</i>                                                        | <i>Quelle</i> | <i>Reduktion</i>                                                                                                                                                                                                       |
| selbst thematisiert                                                                       | Informationspolitik mit Workshops zur Orientierung und Belebung von Debatten, Vermittlung von Möglichkeiten                                                                                                                  | Wichtig                                                                   | Kollaboration/Kooperation                                           | \I21-12\      | K 1.1g Schulungen für technisch weniger versierte Nutzer, Schritt-für-Schritt-Anleitung, Heranführen/Einbinden der Community, didaktischer Prozess, Mehrwerte vermitteln, Testprojekte<br><br><b>Benutzerführung /</b> |

## I21 Extraktion

|                                                           |                                                                                                                                                               |                                                                        |                           |               |                                                                                                                                                                                                                                      |
|-----------------------------------------------------------|---------------------------------------------------------------------------------------------------------------------------------------------------------------|------------------------------------------------------------------------|---------------------------|---------------|--------------------------------------------------------------------------------------------------------------------------------------------------------------------------------------------------------------------------------------|
|                                                           |                                                                                                                                                               |                                                                        |                           |               | <b>Erlernbarkeit</b>                                                                                                                                                                                                                 |
| vom Interviewer thematisiert, vom Befragten konkretisiert | zwei Gruppen von Rezipienten, passive (recherchierende) und aktive,                                                                                           | Anwendung im Workshop unproblematisch mit etwas Vorkenntnissen über TG | Produktion/Manipulation   | \I21-13\      | K 1.1h schwer zu beurteilen, weil im Workshop geführt bzw. nur an einem Bsp. gearbeitet wurde, zu wenig Zeit war, Tool nicht fertig war und<br>K 1.1i unproblematisch, Übungssache<br><br><b>Benutzerführung / Erlernbarkeit</b>     |
| selbst thematisiert                                       | Workshops als erster Schritt der Vermittlung, noch zu wenig, Gefahr des Diktiererischen wie bei TUSTEP, Benutzerfreundlichkeit auch für den "passiven" Nutzer | Barriere                                                               | Kollaboration/Kooperation | \I21-17\      | K 1.1g Schulungen für technisch weniger versierte Nutzer, Schritt-für-Schritt-Anleitung, Heranführen/Einbinden der Community, didaktischer Prozess, Mehrwerte vermitteln, Testprojekte<br><br><b>Benutzerführung / Erlernbarkeit</b> |
| <b>K 2<br/>Rezeption/Zugriff</b>                          |                                                                                                                                                               |                                                                        |                           |               |                                                                                                                                                                                                                                      |
| <i>Benennung</i>                                          | <i>Beschreibung</i>                                                                                                                                           | <i>Bewertung</i>                                                       | <i>Bezug</i>              | <i>Quelle</i> | <i>Reduktion</i>                                                                                                                                                                                                                     |
| vom Interviewer                                           | Dokumentationsebene,                                                                                                                                          | Wichtig                                                                | Organisation/Verwaltung   | \I21-12\      | K 2.2b                                                                                                                                                                                                                               |

## I21 Extraktion

|                                                           |                                                                                                                                                                                  |                                                          |               |          |                                                                                                                                                                                                                                                                                                                                                                                                                       |
|-----------------------------------------------------------|----------------------------------------------------------------------------------------------------------------------------------------------------------------------------------|----------------------------------------------------------|---------------|----------|-----------------------------------------------------------------------------------------------------------------------------------------------------------------------------------------------------------------------------------------------------------------------------------------------------------------------------------------------------------------------------------------------------------------------|
| thematisiert, vom Befragten konkretisiert                 | Datenbankstruktur, Überblick, Suchmasken, Frage der Architektur                                                                                                                  |                                                          |               |          | <p>Leichte Zugänglichkeit, Übersicht durch Browser, Suchmasken, Ontologien, Klassifizierungen, Indizierungen, Strukturierungen</p> <p><b>Zugriffsformen, Rezeptions- und Recherche-möglichkeiten</b></p>                                                                                                                                                                                                              |
| vom Interviewer thematisiert, vom Befragten konkretisiert | Frage, wie viele Inhalte in TG sind, keine weitere Spezialisierung, sondern Zugänglichkeit für jeden möglich machen, Oberfläche, über die man einfach finden kann, was man sucht | interessant, müsste ein Schwerpunkt darauf gelegt werden | Bedienbarkeit | \I21-14\ | <p>K 2.1a<br/>kostenloser Zugriff auf unterschiedliche Repositorien bzw. Ressourcen (z.B. Wörterbücher), Quellen und Ausgaben/ Editionen, Vergleichsmöglichkeiten mit anderen Projekten/ Quellen, orts- und rechnerunabhängiger Zugriff</p> <p><b>Zugriff auf Inhalte</b></p> <p>und</p> <p>K 2.2b<br/>Leichte Zugänglichkeit, Übersicht durch Browser, Suchmasken, Ontologien, Klassifizierungen, Indizierungen,</p> |

## I21 Extraktion

|                     |                                                                                                                                                                                                                                                                         |                                     |                         |          |                                                                                                                                                                                                                                                                                                         |
|---------------------|-------------------------------------------------------------------------------------------------------------------------------------------------------------------------------------------------------------------------------------------------------------------------|-------------------------------------|-------------------------|----------|---------------------------------------------------------------------------------------------------------------------------------------------------------------------------------------------------------------------------------------------------------------------------------------------------------|
|                     |                                                                                                                                                                                                                                                                         |                                     |                         |          | Strukturierungen<br><br><b>Zugriffsformen, Rezeptions- und Recherche-möglichkeiten</b>                                                                                                                                                                                                                  |
| selbst thematisiert | Verfügbarkeit des gesamten Materials in einem Corpus, auch für automatisierten Zugriff                                                                                                                                                                                  | rechtfertigt digitale Edition schon |                         | \I21-15\ | K 2.2a<br>Spezifizierbarkeit des Zugriffs, fachspezifische Zugriffsmöglichkeiten, verschiedene Zugriffsperspektiven durch Auszeichnungen und Präsentationsformen (z.B. parallele Ansicht von Faksimile und Transkription im TBLE)<br><br><b>Zugriffsformen, Rezeptions- und Recherche-möglichkeiten</b> |
| selbst thematisiert | Serendipity-Effekte auch in digitalen Archiven, Mitnahme-Effekt, Auffinden von bedeutenden Aspekten, nach denen man gar nicht gesucht hat, Zoomen, multiperspektivische Rezeptionsmöglichkeiten, Voraussetzung: Überlieferungszusammenhänge wahren und unterschiedliche | gute Chancen                        | Produktion/Manipulation | \I21-16\ | K 2.2a<br>Spezifizierbarkeit des Zugriffs, fachspezifische Zugriffsmöglichkeiten, verschiedene Zugriffsperspektiven durch Auszeichnungen und Präsentationsformen (z.B. parallele Ansicht von Faksimile und Transkription im TBLE)                                                                       |

## I21 Extraktion

|                                                           |                                                                                                                                                                                                                                                                         |                                                                    |                   |               |                                                                                                                                                                                                                                            |
|-----------------------------------------------------------|-------------------------------------------------------------------------------------------------------------------------------------------------------------------------------------------------------------------------------------------------------------------------|--------------------------------------------------------------------|-------------------|---------------|--------------------------------------------------------------------------------------------------------------------------------------------------------------------------------------------------------------------------------------------|
|                                                           | Texte aus derselben Quelle edieren                                                                                                                                                                                                                                      |                                                                    |                   |               | <b>Zugriffsformen, Rezeptions- und Recherche-Möglichkeiten</b>                                                                                                                                                                             |
| <b>K 3<br/>Produktion/Manipulation</b>                    |                                                                                                                                                                                                                                                                         |                                                                    |                   |               |                                                                                                                                                                                                                                            |
| <i>Benennung</i>                                          | <i>Beschreibung</i>                                                                                                                                                                                                                                                     | <i>Bewertung</i>                                                   | <i>Bezug</i>      | <i>Quelle</i> | <i>Reduktion</i>                                                                                                                                                                                                                           |
| selbst thematisiert                                       | statt linearer Transkription Bilddateien und Text Punkt für Punkt miteinander verknüpfen                                                                                                                                                                                | eigene Ausgabe extrem verbesserungsbedürftig --> Mehrwert durch TG |                   | \I21-2\       | K 3.3d<br>Verknüpfungsmöglichkeiten Text-Bild, Transkriptions-/Faksimile-Ansicht<br><br><b>Verknüpfungsmöglichkeiten und deren Visualisierung</b>                                                                                          |
| vom Interviewer thematisiert, vom Befragten konkretisiert | hypertextuelle Struktur format- und betriebssystemunabhängig als Edition anbieten, Entlinearisierung, Netzcharakter auch in der Visualisierung, Textgenese sprengt z.B. auch den Rahmen der Linearität, weil vertikale und horizontale Elemente verknüpft werden müssen | Wichtiger Aspekt, zentrales Problem                                | Rezeption/Zugriff | \I21-3\       | K 3.3a<br>Verknüpfungsmöglichkeiten Text-Text (z.B. editionswiss. Kommentarfunktionen, Varianten verknüpfen, Apparat, Quellen/Referenzen, Register, Wörterbücher, Briefe)<br><br><b>Verknüpfungsmöglichkeiten und deren Visualisierung</b> |
| selbst thematisiert                                       | Rausholen aus Folio Views                                                                                                                                                                                                                                               | Ziel                                                               |                   | \I21-3\       | K 3.1b                                                                                                                                                                                                                                     |

## I21 Extraktion

|                     |                                                                                                                                                                        |                                                                                       |                   |         |                                                                                                                                                                                                                                                                                                                                      |
|---------------------|------------------------------------------------------------------------------------------------------------------------------------------------------------------------|---------------------------------------------------------------------------------------|-------------------|---------|--------------------------------------------------------------------------------------------------------------------------------------------------------------------------------------------------------------------------------------------------------------------------------------------------------------------------------------|
|                     | unter Beibehaltung der Verknüpfungsstruktur in HTML oder XML, derzeit schon Originalquellen als Bilddateien unabhängig von Folio Views auf einer Double Layer DVD      |                                                                                       |                   |         | XML-Auszeichnungs- bzw. Produktionshilfe, Tools zur digitalen Herstellung und Verfügbarmachung von Texten, XML-Schemata vorgefertigt für verschiedene individuelle Bedürfnisse, Konvertierung in XML/TEI, Baseline Encoding, Streaming Editor, Unterstützung bei zunächst geringerer Auszeichnungstiefe<br><br><b>XML-Produktion</b> |
| selbst thematisiert | Verknüpfung von Text und Bild bzw. einzelnen Bereichen des Bildes                                                                                                      | TG bieten Möglichkeiten für uns durch den TBLE, wäre aber mühsam bei etwa 1200 Seiten | Rezeption/Zugriff | \I21-4\ | K 3.3d<br>Verknüpfungsmöglichkeiten Text-Bild, Transkriptions-/Faksimile-Ansicht<br><br><b>Verknüpfungsmöglichkeiten und deren Visualisierung</b>                                                                                                                                                                                    |
| selbst thematisiert | Rückführung von mittelalterlichen Quellen, die ursprünglich keine Buchform hatten, aus dem Buch, zu Klassikereditionen aufgrund des Autor-Status Entstehungsgeschichte | Chance der Digitalität, Ökonomischer Vorteil, Platz als Vorteil                       | Rezeption/Zugriff | \I21-6\ | K 3.4c<br>Veränderung von Arbeitsprozessen durch digitale Technik (nicht bzgl. Hypothesenbildung, Erkenntnisse usw.), Aufbrechen von                                                                                                                                                                                                 |

## I21 Extraktion

|                     |                                                                                                                                                                                                                                                                                                                                                                                                            |                               |                   |          |                                                                                                                                                                          |
|---------------------|------------------------------------------------------------------------------------------------------------------------------------------------------------------------------------------------------------------------------------------------------------------------------------------------------------------------------------------------------------------------------------------------------------|-------------------------------|-------------------|----------|--------------------------------------------------------------------------------------------------------------------------------------------------------------------------|
|                     | dokumentieren und Hintergrundmaterialien anreichern, z.B. Briefe, sprengt ebenfalls die Grenzen des Buches, und drittens Texte, die nicht Buch geworden sind, Notizen, Entwürfe usw. Fragmente vor der Produktion mit dem Computer bis etwa in die 70er, ebenfalls keine Buchform, Verweis auf die von Reuß aufgebrachte Debatte bzgl. digitaler Editionen (Faksimile darstellen, keine Verfälschung usw.) |                               |                   |          | Medienkonventionen vs. Ausrichtung auf das Buch als Hürde<br><br><b>Produktionsunterstützung allgemein</b>                                                               |
| selbst thematisiert | automatisierte Analysen zu Fragestellungen durch digitalisiertes Material möglich                                                                                                                                                                                                                                                                                                                          | rechtfertigt digitale Edition | Rezeption/Zugriff | \I21-15\ | K 3.2c<br>Visualisierung von Auszeichnungen, Worthäufigkeiten, Kollokationen, Themaerschließung, Mustererkennung<br><br><b>Analyse- und Visualisierungsmöglichkeiten</b> |
| selbst thematisiert | mehrere Texte aus derselben Quelle edieren, multiperspektivischen Zugang schaffen                                                                                                                                                                                                                                                                                                                          | Potenzial                     | Rezeption/Zugriff | \I21-16\ | K 3.2b<br>Unterschiede durch Textvergleich (Kollationierung, TBLE) visualisieren, Schreiberhände vergleichen, Textgenese, Entwicklungsprozess                            |

## I21 Extraktion

|                                                           |                                                                              |                  |                           |               |                                                                                                                                                                     |
|-----------------------------------------------------------|------------------------------------------------------------------------------|------------------|---------------------------|---------------|---------------------------------------------------------------------------------------------------------------------------------------------------------------------|
|                                                           |                                                                              |                  |                           |               | rekonstruieren und darstellen, Schichten und Räumlichkeit darstellen, multiperspektivischen Zugang schaffen<br><br><b>Analyse- und Visualisierungsmöglichkeiten</b> |
| selbst thematisiert                                       | Zugriff auf gute Werkzeuge                                                   | Vorteil, positiv |                           | \I21-17\      | K 3.4a<br>Arbeitsumgebung mit Tool-Angebot, nicht alles neu /selbst programmieren, kostenlos<br><br><b>Produktionsunterstützung allgemein</b>                       |
| <b>K 4<br/>Modularität/Anpassbarkeit</b>                  |                                                                              |                  |                           |               |                                                                                                                                                                     |
| <i>Benennung</i>                                          | <i>Beschreibung</i>                                                          | <i>Bewertung</i> | <i>Bezug</i>              | <i>Quelle</i> | <i>Reduktion</i>                                                                                                                                                    |
| vom Interviewer thematisiert, vom Befragten konkretisiert | Anschließbarkeit von eigenen Entwicklungen, Werkzeuge und Plattform für alle | Hauptvorteil     | Produktion/Manipulation   | \I21-17\      | K 4.2a<br>Anschließbarkeit und Kombinierbarkeit von Tools und Services, auch von selbstentwickelten – modulares Konzept<br><br><b>Tools und Services</b>            |
| selbst thematisiert                                       | Weiterentwicklung von TEI-Tags möglich                                       | großer Vorteil   | Kollaboration/Kooperation | \I21-17\      | K 4.3c<br>Schemata und Metadaten- bzw. Auszeichnungs-Konzepte                                                                                                       |



## I21 Extraktion

|                                                           |                                                                                                                                                                                              |                                      |                                            |               |                                                                                                                                                                                      |
|-----------------------------------------------------------|----------------------------------------------------------------------------------------------------------------------------------------------------------------------------------------------|--------------------------------------|--------------------------------------------|---------------|--------------------------------------------------------------------------------------------------------------------------------------------------------------------------------------|
|                                                           |                                                                                                                                                                                              |                                      |                                            |               | anpassen/nachnutzen und eigene einbinden<br><b>Inhalte</b>                                                                                                                           |
| <b>K 5<br/>Kollaboration/Kooperation</b>                  |                                                                                                                                                                                              |                                      |                                            |               |                                                                                                                                                                                      |
| <i>Benennung</i>                                          | <i>Beschreibung</i>                                                                                                                                                                          | <i>Bewertung</i>                     | <i>Bezug</i>                               | <i>Quelle</i> | <i>Reduktion</i>                                                                                                                                                                     |
| selbst thematisiert                                       | Material in TG stellen, durch einzelne Forscher ganz bestimmte textgenetische Untersuchungen, die nicht gelöscht werden, sondern danach auch zur Verfügung stehen, Erweiterung nach und nach | mögliche Perspektive für TG-Funktion | Modularität/Anpassbarkeit                  | \I21-5\       | K 5.1a<br>Austausch von Ressourcen, Nachnutzung<br><br><b>Austausch von Inhalten und Werkzeugen</b>                                                                                  |
| selbst thematisiert                                       | TG sollte auch andere, z.B. deutschsprachiges Ausland oder konventionellere Editoren oder Andersdenkende wie Reuß in Debatten z.B. in Workshops einbeziehen                                  | Wäre interessant                     |                                            | \I21-7\       | K 5.3b<br>Community-Building erforderlich, Umdenken erforderlich, durch Überzeugungsarbeit, Veranstaltungen und Erfahrungsaustausch anregen<br><br><b>Community-Building-Aspekte</b> |
| vom Interviewer thematisiert, vom Befragten konkretisiert | Inhalte des digitalen Erbes digital vermitteln, zweite Ebene der Kommunikation darüber aufbauen, auch interdisziplinär offen, kein Nachlaufen bzgl. des Originals mehr, internationale       | ganz besonderes Potenzial            | Organisation/Verwaltung, Rezeption/Zugriff | \I21-9\       | K 5.1a<br>Austausch von Ressourcen, Nachnutzung<br><br><b>Austausch von Inhalten und Werkzeugen</b>                                                                                  |

## I21 Extraktion

|                                                           |                                                                                                                                                                                                                   |                                |                                                  |          |                                                                                                                                                                                                                                                                                   |
|-----------------------------------------------------------|-------------------------------------------------------------------------------------------------------------------------------------------------------------------------------------------------------------------|--------------------------------|--------------------------------------------------|----------|-----------------------------------------------------------------------------------------------------------------------------------------------------------------------------------------------------------------------------------------------------------------------------------|
|                                                           | Forschergemeinschaft mit Zugriff auf das Archiv                                                                                                                                                                   |                                |                                                  |          | K 5.3d<br>Kommunikationsplattform, Social-Anwendungen<br><br><b>Community-Building-Aspekte</b>                                                                                                                                                                                    |
| vom Interviewer thematisiert, vom Befragten konkretisiert | das Moment der Dislozierung, Kompetenzen an verschiedenen Orten, Kommunikationsoptimierung notwendig, Zusammenarbeit von verschiedenen Arbeitsplätzen aus                                                         | sehr wichtig, vielversprechend | Produktion/Manipulation                          | \I21-10\ | K 5.2a<br>Zusammenarbeit in Teams von verschiedenen Orten aus, auch an einem Dokument, verteilte Bearbeitung verschiedener ‚Schichten‘ eines Dokuments usw.<br><br><b>Zusammenarbeit</b>                                                                                          |
| vom Interviewer thematisiert, vom Befragten konkretisiert | Infrastruktur aufbauen, über die Kooperation bei der Digitalisierung und Erschließung von Quellenkorpora möglich wäre, dabei darf TG aber nicht selbst ein Format werden, gesamteuropäische Institutionalisierung | größtes Potenzial              | Organisation/Verwaltung, Produktion/Manipulation | \I21-11\ | K 5.1a<br>Austausch von Ressourcen, Nachnutzung<br><br><b>Austausch von Inhalten und Werkzeugen</b><br><br>und<br><br>K 5.2a<br>Zusammenarbeit in Teams von verschiedenen Orten aus, auch an einem Dokument, verteilte Bearbeitung verschiedener ‚Schichten‘ eines Dokuments usw. |

|                                        |                                                                                                                                                                                                                                                                                                                                                               |                                              |              |               |                                                                                                                                                                                  |
|----------------------------------------|---------------------------------------------------------------------------------------------------------------------------------------------------------------------------------------------------------------------------------------------------------------------------------------------------------------------------------------------------------------|----------------------------------------------|--------------|---------------|----------------------------------------------------------------------------------------------------------------------------------------------------------------------------------|
|                                        |                                                                                                                                                                                                                                                                                                                                                               |                                              |              |               | <b>Zusammenarbeit</b>                                                                                                                                                            |
| selbst thematisiert                    | TEI-Kompatibilität, XML-basiert                                                                                                                                                                                                                                                                                                                               | entscheidender Fortschritt/Vorteil           |              | \I21-17\      | K 5.1d<br>Standards, TEI,<br>Unabhängigkeit von<br>Datenformaten<br><br><b>Austausch von Inhalten<br/>und Werkzeugen</b>                                                         |
| <b>K 6<br/>Organisation/Verwaltung</b> |                                                                                                                                                                                                                                                                                                                                                               |                                              |              |               |                                                                                                                                                                                  |
| <i>Benennung</i>                       | <i>Beschreibung</i>                                                                                                                                                                                                                                                                                                                                           | <i>Bewertung</i>                             | <i>Bezug</i> | <i>Quelle</i> | <i>Reduktion</i>                                                                                                                                                                 |
| selbst thematisiert                    | betriebssystem- und formatunabhängiges Erhalten einer komplexen Edition als Informationssystem mit Verknüpfungen von Text- und Bildelementen, Text und Kommentar, verschiedenen Formen von ediertem Text, Verhinderung von Zugriffs- und Benutzungsschwierigkeiten wegen veralteter Datenformate, Langzeitarchivierung, Überlebensfähigkeit der Daten sichern | zentraler Aspekt, eines der Hauptbedürfnisse |              | \I21-2\       | K 6.1b<br>Datenspeicherung und –verwaltung, Langzeitarchivierung, verbunden mit Bearbeitungsmöglichkeiten und Nachnutzung<br><br><b>Organisation und Verwaltung von Inhalten</b> |
| selbst thematisiert                    | urheberrechtliche Komponenten                                                                                                                                                                                                                                                                                                                                 | Wichtiger Punkt                              |              | \I21-6\       | K 6.1c<br>Adressierung, Zitierbarkeit, Urheberrecht, Leistungsanerkennung                                                                                                        |

## I21 Extraktion

|                     |                                                                                                                               |                                            |  |         | <b>Organisation und<br/>Verwaltung von Inhalten</b>                                                                                                                                                                |
|---------------------|-------------------------------------------------------------------------------------------------------------------------------|--------------------------------------------|--|---------|--------------------------------------------------------------------------------------------------------------------------------------------------------------------------------------------------------------------|
| selbst thematisiert | digitale Strukturen bieten, die kulturelles Erbe sichern und in die digitale Umgebung des Internets überführen und vermitteln | Hauptbedeutung des TextGrid, höchstes Ziel |  | \I21-8\ | <p>K 6.1b<br/>Datenspeicherung und –verwaltung,<br/>Langzeitarchivierung,<br/>verbunden mit<br/>Bearbeitungs-<br/>möglichkeiten und<br/>Nachnutzung</p> <p><b>Organisation und<br/>Verwaltung von Inhalten</b></p> |
