# Supplementary material
Source: publisher site journal article supplement (https://www.degruyterbrill.com/publication/isbn/9783110463927/downloadAsset/9783110463927_Extraktionen_Reduktionen_fallbezogen.zip)
Supplement: Supplementary file 15 [file I22 Extraktion und Reduktion.pdf › fallbezogene Extraktionen und Reduktionen/I22 Extraktion und Reduktion.pdf]

## I22 Extraktion

| <b>TÄTIGKEITEN UND EDV-ERFAHRUNG</b>                                                          |                                                                                                                                                  |                                                   |                                                    |               |                                                                                                                         |
|-----------------------------------------------------------------------------------------------|--------------------------------------------------------------------------------------------------------------------------------------------------|---------------------------------------------------|----------------------------------------------------|---------------|-------------------------------------------------------------------------------------------------------------------------|
| <b>Tätigkeiten</b>                                                                            |                                                                                                                                                  |                                                   |                                                    |               |                                                                                                                         |
| <i>Gegenstände</i>                                                                            | <i>Methoden/Verfahren</i>                                                                                                                        | <i>Ziele/Fragen</i>                               | <i>Institutioneller Rahmen</i>                     | <i>Quelle</i> |                                                                                                                         |
| digital Edition, digitale Archive, Lehre Masterstudium Wahlfachmodul Informationsmodellierung | angewandte digitale Editionstechnik                                                                                                              |                                                   | Universität, Forschungszentrum, Leiter/in          | \I22-1\       |                                                                                                                         |
| Wissensrepräsentation, ontologiebasierte Modellierung von Wissensdomänen, Annotationssprachen | Datenmodellierung, Semantisierung                                                                                                                | nachhaltige Datenqualität und -nutzbarkeit        | Universität, Forschungszentrum                     | \I22-2\       |                                                                                                                         |
| <b>Erfahrung</b>                                                                              |                                                                                                                                                  |                                                   |                                                    |               |                                                                                                                         |
|                                                                                               | <i>Beschreibung</i>                                                                                                                              | <i>Bewertung</i>                                  |                                                    | <i>Quelle</i> |                                                                                                                         |
|                                                                                               | digitale Editionstechnik, digitale Archive                                                                                                       | technische Erfahrung zentral, Leiter des Zentrums |                                                    | \I22-1\       |                                                                                                                         |
|                                                                                               | Beschäftigung mit Annotationssprachen wie XML und TEI                                                                                            | ganz zentrale Beschäftigung --> große Erfahrung   |                                                    | \I22-2\       |                                                                                                                         |
|                                                                                               | Eclipse gewohnt                                                                                                                                  | Erfahrung in dem Bereich hoch                     |                                                    | \I22-9\       |                                                                                                                         |
| <b>BEDARFSKATEGORIEN</b>                                                                      |                                                                                                                                                  |                                                   |                                                    |               |                                                                                                                         |
| <b>K 1 Bedienbarkeit</b>                                                                      |                                                                                                                                                  |                                                   |                                                    |               |                                                                                                                         |
| <i>Benennung</i>                                                                              | <i>Beschreibung</i>                                                                                                                              | <i>Bewertung</i>                                  | <i>Bezug</i>                                       | <i>Quelle</i> | <i>Reduktion</i>                                                                                                        |
| vom Interviewer thematisiert, vom Befragten konkretisiert                                     | Grundvoraussetzung: Fachwissenschaftler müssen kein XML können, arbeiten mit Word und OpenOffice, man kann nicht jedem Fachwissenschaftler auf's | grundlegender Aspekt, wichtiger Punkt             | Produktion/Manipulation, Modularität/Anpassbarkeit | \I22-6\       | K 1.4b Arbeiten wie in der „normalen“ Textverarbeitung ermöglichen, Vermeidung von spitzen Klammern, XML-Generierung im |

## I22 Extraktion

|                                                           |                                                                                                                                                                                                                                                                                                                                                                         |                                                                                                                                                                             |                                                    |         |                                                                                                                                                                                                                                         |
|-----------------------------------------------------------|-------------------------------------------------------------------------------------------------------------------------------------------------------------------------------------------------------------------------------------------------------------------------------------------------------------------------------------------------------------------------|-----------------------------------------------------------------------------------------------------------------------------------------------------------------------------|----------------------------------------------------|---------|-----------------------------------------------------------------------------------------------------------------------------------------------------------------------------------------------------------------------------------------|
|                                                           | Auge drücken, TEI bzw. XML zu kodieren                                                                                                                                                                                                                                                                                                                                  |                                                                                                                                                                             |                                                    |         | Hintergrund<br><br><b>Bedienbarkeit der Auszeichnungsebene</b>                                                                                                                                                                          |
| selbst thematisiert                                       | Am Anfang steht ein didaktisch moderierter iterativer Prozess, in dem Fachwissenschaftler darauf kommen, was sie wollen können von so einem System, XML als wichtiges Instrument, das uns in der Informationsverarbeitung den Text zurückgegeben hat, Funktionalitäten am semantisierten Text erkennbar, die auch die Bedeutung für das wissenschaftliche Denken zeigen | Wichtiger Aspekt                                                                                                                                                            | Produktion/Manipulation, Kollaboration/Kooperation | \I22-7\ | K 1.1g<br>Schulungen für technisch weniger versierte Nutzer, Schritt-für-Schritt-Anleitung, Heranführen/Einbinden der Community, didaktischer Prozess, Mehrwerte vermitteln, Testprojekte<br><br><b>Benutzerführung / Erlernbarkeit</b> |
| vom Interviewer thematisiert, vom Befragten konkretisiert | Usability, englischsprachige Benutzeroberfläche, kulturräumliche Spezifika können verloren gehen,                                                                                                                                                                                                                                                                       | zufriedenstellend, gut, aber aufgrund von Eclipse-Erfahrung "vorbelastet", englischsprachige Benutzeroberfläche kein Problem, aber zusätzliche Ebene, die verunsichern kann | Produktion/Manipulation                            | \I22-9\ | K 1.1d<br>mit mehr EDV-Erfahrung (z.B. mit Eclipse) schnell erlernbar und gut bedienbar<br><br><b>Benutzerführung / Erlernbarkeit</b><br><br>und<br><br>K 1.2d<br>Deutschsprachige                                                      |

## I22 Extraktion

|                                                                 |                                                                                                                                                                    |                           |                          |               |                                                                                                                                                                                                                                                                                                                                                                            |
|-----------------------------------------------------------------|--------------------------------------------------------------------------------------------------------------------------------------------------------------------|---------------------------|--------------------------|---------------|----------------------------------------------------------------------------------------------------------------------------------------------------------------------------------------------------------------------------------------------------------------------------------------------------------------------------------------------------------------------------|
|                                                                 |                                                                                                                                                                    |                           |                          |               | Oberfläche<br>nützlich/notwendig<br><br><b>Orientierung /<br/>         Übersichtlichkeit /<br/>         Oberflächen-<br/>         gestaltung</b>                                                                                                                                                                                                                           |
| <b>K 2<br/>Rezeption/Zugriff</b>                                |                                                                                                                                                                    |                           |                          |               |                                                                                                                                                                                                                                                                                                                                                                            |
| <i>Benennung</i>                                                | <i>Beschreibung</i>                                                                                                                                                | <i>Bewertung</i>          | <i>Bezug</i>             | <i>Quelle</i> | <i>Reduktion</i>                                                                                                                                                                                                                                                                                                                                                           |
| selbst thematisiert                                             | für "prädikate", logische<br>Abfragen Daten<br>erschließen                                                                                                         | zentrale<br>Beschäftigung | Produktion/Manipulation, | \I22-2\       | K 2.2a<br>Spezifizierbarkeit des<br>Zugriffs, fachspezifische<br>Zugriffsmöglichkeiten,<br>verschiedene<br>Zugriffsperspektiven<br>durch Auszeichnungen<br>und Präsentationsformen<br>(z.B. parallele Ansicht<br>von Faksimile und<br>Transkription im TBLE)<br><br><b>Zugriffsformen,<br/>         Rezeptions- und<br/>         Recherche-<br/>         möglichkeiten</b> |
| vom Interviewer<br>thematisiert, vom Befragten<br>konkretisiert | in der Transliteration des<br>Textes mit Curser<br>bewegen und dabei<br>kontextbezogen<br>Editionskommentare und<br>Lupenansicht der<br>Handschrift sichtbar, wird |                           | Produktion/Manipulation  | \I22-12\      | K 2.2a<br>Spezifizierbarkeit des<br>Zugriffs, fachspezifische<br>Zugriffsmöglichkeiten,<br>verschiedene<br>Zugriffsperspektiven<br>durch Auszeichnungen                                                                                                                                                                                                                    |

## I22 Extraktion

|                                                           |                                                                                                                                                                                                                                            |                                 |                           |          |                                                                                                                                                                                                                                   |
|-----------------------------------------------------------|--------------------------------------------------------------------------------------------------------------------------------------------------------------------------------------------------------------------------------------------|---------------------------------|---------------------------|----------|-----------------------------------------------------------------------------------------------------------------------------------------------------------------------------------------------------------------------------------|
|                                                           | möglich durch Modellierung                                                                                                                                                                                                                 |                                 |                           |          | und Präsentationsformen (z.B. parallele Ansicht von Faksimile und Transkription im TBLE)<br><br><b>Zugriffsformen, Rezeptions- und Recherche-möglichkeiten</b>                                                                    |
| vom Interviewer thematisiert, vom Befragten konkretisiert | Datenorganisation zur Orientierung, Bilden von inhaltlichen Konfigurationen, Modellierung durch den Nutzer                                                                                                                                 | ganz wichtige Form              | Kollaboration/Kooperation | \I22-13\ | K 2.2b<br>Leichte Zugänglichkeit, Übersicht durch Browser, Suchmasken, Ontologien, Klassifizierungen, Indizierungen, Strukturierungen<br><br><b>Zugriffsformen, Rezeptions- und Recherche-möglichkeiten</b>                       |
| vom Interviewer thematisiert, vom Befragten konkretisiert | Suche nach grammatischen Strukturen durch entsprechende Auszeichnung möglich, Möglichkeit für neue Erkenntnisse, durch Modellierung bis auf Glyphen-Ebene sind Untersuchungen nach Verzierungsformen, Diakritika-Formen, Superskripten und | potenzial für neue Erkenntnisse | Produktion/Manipulation   | \I22-17\ | K 2.2a<br>Spezifizierbarkeit des Zugriffs, fachspezifische Zugriffsmöglichkeiten, verschiedene Zugriffsperspektiven durch Auszeichnungen und Präsentationsformen (z.B. parallele Ansicht von Faksimile und Transkription im TBLE) |

|                                                           |                                                                                                                                                                                                                          |                                                                                                                                                               |                                                                     |               |                                                                                                                                                                                                                                                                                               |
|-----------------------------------------------------------|--------------------------------------------------------------------------------------------------------------------------------------------------------------------------------------------------------------------------|---------------------------------------------------------------------------------------------------------------------------------------------------------------|---------------------------------------------------------------------|---------------|-----------------------------------------------------------------------------------------------------------------------------------------------------------------------------------------------------------------------------------------------------------------------------------------------|
|                                                           | Subskripten möglich, Synopsendarstellung von Fassungsvarianten, auf Basis von TEI lassen sich auch neue Repräsentationsformate in Form von Analyseansichten generieren                                                   |                                                                                                                                                               |                                                                     |               | <b>Zugriffsformen, Rezeptions- und Recherche-möglichkeiten</b>                                                                                                                                                                                                                                |
| <b>K 3<br/>Produktion/Manipulation</b>                    |                                                                                                                                                                                                                          |                                                                                                                                                               |                                                                     |               |                                                                                                                                                                                                                                                                                               |
| <i>Benennung</i>                                          | <i>Beschreibung</i>                                                                                                                                                                                                      | <i>Bewertung</i>                                                                                                                                              | <i>Bezug</i>                                                        | <i>Quelle</i> | <i>Reduktion</i>                                                                                                                                                                                                                                                                              |
| vom Interviewer thematisiert, vom Befragten konkretisiert | Modellierung von Daten und Semantisierung von Texten i.S.v. Wissensrepräsentation und Repräsentation von Wissensprodukten als künftig wichtige Aufgabe von Geisteswissenschaftlern, wichtige Funktionalität von Systemen | Nachhaltigkeit durch Datenqualität, Technologien verändern sich hingegen, künftig wichtig, müssen sich Geisteswissenschaftler stärker damit auseinandersetzen |                                                                     | \I22-2\       | K 3.1c<br>Auszeichnungsmöglichkeiten / Informationsanreicherung zur Bearbeitung neuer Fragestellungen, tiefere Auszeichnung, spezifischere Auszeichnung je nach Forschungsinteresse (z.B. Musikwissenschaft), semantische Auszeichnung, Informationsmodellierung<br><br><b>XML-Produktion</b> |
| vom Interviewer thematisiert, vom Befragten konkretisiert | für Word und OpenOffice werden Dokumentvorlagen definiert, mit denen Fachwissenschaftler arbeiten, wir generieren                                                                                                        | diesen Weg möchte ich gehen, in vielen Projekten ganz wichtig                                                                                                 | Bedienbarkeit, Modularität/Anpassbarkeit, Kollaboration/Kooperation | \I22-6\       | K 3.1b<br>XML-Auszeichnungs- bzw. Produktionshilfe, Tools zur digitalen Herstellung und Verfügbarmachung von                                                                                                                                                                                  |

## I22 Extraktion

|                                                           |                                                                                                         |                                                                    |                   |          |                                                                                                                                                                                                                                                                                            |
|-----------------------------------------------------------|---------------------------------------------------------------------------------------------------------|--------------------------------------------------------------------|-------------------|----------|--------------------------------------------------------------------------------------------------------------------------------------------------------------------------------------------------------------------------------------------------------------------------------------------|
|                                                           | automatisiert TEI-Dokumente daraus über OpenDocument-Format,                                            |                                                                    |                   |          | Texten, XML-Schemata vorgefertigt für verschiedene individuelle Bedürfnisse, Konvertierung in XML/TEI, Baseline Encoding, Streaming Editor, Unterstützung bei zunächst geringerer Auszeichnungstiefe<br><br><b>XML-Produktion</b>                                                          |
| selbst thematisiert                                       | XML als Informationsverarbeitung am Text                                                                | Potenzial, wichtige Erkenntnis                                     | Rezeption/Zugriff | \I22-7\  | K 3.1c Auszeichnungsmöglichkeiten / Informationsanreicherung zur Bearbeitung neuer Fragestellungen, tiefere Auszeichnung, spezifischere Auszeichnung je nach Forschungsinteresse (z.B. Musikwissenschaft), semantische Auszeichnung, Informationsmodellierung<br><br><b>XML-Produktion</b> |
| vom Interviewer thematisiert, vom Befragten konkretisiert | Auszeichnung als Basis neuer Zugriffsformen, z.B. auch neue Repräsentationsformate in Form von Analyse- | potenzial für neue Erkenntnisse, neues wissenschaftliches Arbeiten | Rezeption/Zugriff | \I22-17\ | K 3.1c Auszeichnungsmöglichkeiten / Informationsanreicherung zur Bearbeitung neuer                                                                                                                                                                                                         |

## I22 Extraktion

|                                  |                                                                                                                 |                      |                                                    |               |                                                                                                                                                                                                         |
|----------------------------------|-----------------------------------------------------------------------------------------------------------------|----------------------|----------------------------------------------------|---------------|---------------------------------------------------------------------------------------------------------------------------------------------------------------------------------------------------------|
|                                  | Ansichten                                                                                                       |                      |                                                    |               | Fragestellungen, tiefere Auszeichnung, spezifischere Auszeichnung je nach Forschungsinteresse (z.B. Musikwissenschaft), semantische Auszeichnung, Informationsmodellierung<br><br><b>XML-Produktion</b> |
| <b>K 4</b>                       |                                                                                                                 |                      |                                                    |               |                                                                                                                                                                                                         |
| <b>Modularität/Anpassbarkeit</b> |                                                                                                                 |                      |                                                    |               |                                                                                                                                                                                                         |
| <i>Benennung</i>                 | <i>Beschreibung</i>                                                                                             | <i>Bewertung</i>     | <i>Bezug</i>                                       | <i>Quelle</i> | <i>Reduktion</i>                                                                                                                                                                                        |
| selbst thematisiert              | Verarbeitbarkeit der modellierten Daten mit verschiedenen Frameworks und Technologien                           |                      | Kollaboration/Kooperation, Produktion/Manipulation | \I22-2\       | K 4.3a<br>Anschließbarkeit/<br>Nachnutzung von Ressourcen, Formate mappen<br><br><b>Inhalte</b>                                                                                                         |
| selbst thematisiert              | standardisiertes Tool als modulhafte, erweiterbare Plattform, wo unterschiedlichste Werkzeuge einfließen können | zutiefst sinnvoll    | Kollaboration/Kooperation                          | \I22-3\       | K 4.2a<br>Anschließbarkeit und Kombinierbarkeit von Tools und Services, auch von selbstentwickelten – modulares Konzept<br><br><b>Tools und Services</b>                                                |
| selbst thematisiert              | Modularität/Anpassbarkeit von Tools an spezifische Annotationsformen, z.B.                                      | diesen Weg gehen wir | Produktion/Manipulation, Bedienbarkeit             | \I22-6\       | K 4.2b<br>Anpassbarkeit von Tools an das jeweilige Projekt /                                                                                                                                            |

## I22 Extraktion

|                                                           |                                                                                                                                                       |                                                               |                                                    |               |                                                                                                            |
|-----------------------------------------------------------|-------------------------------------------------------------------------------------------------------------------------------------------------------|---------------------------------------------------------------|----------------------------------------------------|---------------|------------------------------------------------------------------------------------------------------------|
|                                                           | das Leidener Klammersystem, Tool zur Überführung in ein XML-Dokument für die Weiterverarbeitung                                                       |                                                               |                                                    |               | die jeweiligen Gegenstände<br><b>Tools und Services</b>                                                    |
| vom Interviewer thematisiert, vom Befragten konkretisiert | proprietäre Formate in ein nachhaltiges Format überführen, manchmal "Software-Archäologie", aber in die gewohnte Arbeitsumgebung hineinimplementieren | Gutteil unserer Arbeit                                        | Organisation/Verwaltung                            | \I22-14\      | K 4.3a<br>Anschließbarkeit/<br>Nachnutzung von Ressourcen, Formate mappen<br><b>Inhalte</b>                |
| <b>K 5<br/>Kollaboration/Kooperation</b>                  |                                                                                                                                                       |                                                               |                                                    |               |                                                                                                            |
| <i>Benennung</i>                                          | <i>Beschreibung</i>                                                                                                                                   | <i>Bewertung</i>                                              | <i>Bezug</i>                                       | <i>Quelle</i> | <i>Reduktion</i>                                                                                           |
| selbst thematisiert                                       | Geisteswissenschaftler müssen Daten modellieren, Weiterverarbeitung mit Frameworks und Technologien durch Informationstechniker                       |                                                               | Produktion/Manipulation, Modularität/Anpassbarkeit | \I22-2\       | K 5.1a<br>Austausch von Ressourcen, Nachnutzung<br><b>Austausch von Inhalten und Werkzeugen</b>            |
| selbst thematisiert                                       | Wir verwenden TEI                                                                                                                                     |                                                               | Produktion/Manipulation                            | \I22-2\       | K 5.1d<br>Standards, TEI, Unabhängigkeit von Datenformaten<br><b>Austausch von Inhalten und Werkzeugen</b> |
| selbst thematisiert                                       | standardisiertes Tool, "nicht jeder erfindet ständig die Welt neu", grafischer Editor wirft                                                           | zutiefst sinnvoll, grafischer Editor zu wenig standardbasiert | Modularität/Anpassbarkeit, Bedienbarkeit           | \I22-3\       | K 5.1c<br>Austausch von Arbeitsmitteln (Tools, Formaten, Skripten usw.)                                    |



## I22 Extraktion

|                     |                                                                                                                                                                                                                                                                                                                      |                     |                         |          |                                                                                                                                                               |
|---------------------|----------------------------------------------------------------------------------------------------------------------------------------------------------------------------------------------------------------------------------------------------------------------------------------------------------------------|---------------------|-------------------------|----------|---------------------------------------------------------------------------------------------------------------------------------------------------------------|
|                     | allerdings natives Format aus                                                                                                                                                                                                                                                                                        |                     |                         |          | und<br>K 5.1d<br>Standards, TEI,<br>Unabhängigkeit von<br>Datenformaten<br><br><b>Austausch von Inhalten<br/>und Werkzeugen</b>                               |
| selbst thematisiert | Fachwissenschaftler und Techniker im iterativen Prozess, Techniker erkennen oft nicht die methodologischen Probleme von Geisteswissenschaftlern, unterschätzen die Bedeutung von XML, Geisteswissenschaftler denken weniger kategorial, können am Text arbeiten und Bedeutung für wissenschaftliches Denken erkennen | bedeutender Prozess | Produktion/Manipulation | \I22-7\  | K 5.2b<br>Zusammenarbeit zwischen Institutionen, Projekten, auch intern zwischen verschiedenen Stellen, mit Technikern, Workflow<br><br><b>Zusammenarbeit</b> |
| selbst thematisiert | Ressentiments, was das Einstellen von Inhalten angeht, noch keine realen Projekte in TG beim Workshop                                                                                                                                                                                                                | etwas "überrascht"  | Organisation/Verwaltung | \I22-10\ | K 5.1a<br>Austausch von Ressourcen, Nachnutzung und<br>K 5.1b<br>Austausch von Arbeits- bzw. Forschungsergebnissen, Bereitschaft dazu                         |

|                                                           |                                                                                                                                                                                                                                                    |                         |                         |          |                                                                                                                                                                                                                                                                                                                 |
|-----------------------------------------------------------|----------------------------------------------------------------------------------------------------------------------------------------------------------------------------------------------------------------------------------------------------|-------------------------|-------------------------|----------|-----------------------------------------------------------------------------------------------------------------------------------------------------------------------------------------------------------------------------------------------------------------------------------------------------------------|
|                                                           |                                                                                                                                                                                                                                                    |                         |                         |          | <b>Austausch von Inhalten und Werkzeugen</b><br><br>und<br><br>K 5.3a<br>Partizipation/Nutzung als Voraussetzung<br>und<br>K 5.3b<br>Community-Building erforderlich, Umdenken erforderlich, durch Überzeugungsarbeit, Veranstaltungen und Erfahrungsaustausch anregen<br><br><b>Community-Building-Aspekte</b> |
| vom Interviewer thematisiert, vom Befragten konkretisiert | Zusammenarbeit zwischen Bibliothek und Fachwissenschaft, Fachwissenschaftler müssten fachbezogene Metadaten beisteuern, Bibliothek die deskriptiven, die Ressource erschließenden Metadaten, Tool sollte Formen des Zusammenarbeitens unterstützen | schwierig, aber wichtig | Produktion/Manipulation | \I22-11\ | K 5.2b<br>Zusammenarbeit zwischen Institutionen, Projekten, auch intern zwischen verschiedenen Stellen, mit Technikern, Workflow<br><br><b>Zusammenarbeit</b>                                                                                                                                                   |

## I22 Extraktion

|                                                           |                                                                                                                                                                                                   |                                                                  |                                                  |          |                                                                                                                                                                                                                    |
|-----------------------------------------------------------|---------------------------------------------------------------------------------------------------------------------------------------------------------------------------------------------------|------------------------------------------------------------------|--------------------------------------------------|----------|--------------------------------------------------------------------------------------------------------------------------------------------------------------------------------------------------------------------|
| selbst thematisiert                                       | bei vielen Editionsprojekten arbeiten mehrere Personen an einem Dokument                                                                                                                          | muss unterstützt werden                                          | Organisation/Verwaltung                          | \I22-11\ | K 5.2a<br>Zusammenarbeit in Teams von verschiedenen Orten aus, auch an einem Dokument, verteilte Bearbeitung verschiedener ‚Schichten‘ eines Dokuments usw.<br><br><b>Zusammenarbeit</b>                           |
| vom Interviewer thematisiert, vom Befragten konkretisiert | Fachwissenschaftler sollten bei der Inhaltsmodellierung immer beraten werden, aber es sollte eine Ebene geben, auf der sie selbst modellieren können                                              | Wichtig                                                          | Organisation/Verwaltung, Produktion/Manipulation | \I22-13\ | K 5.2b<br>Zusammenarbeit zwischen Institutionen, Projekten, auch intern zwischen verschiedenen Stellen, mit Technikern, Workflow<br><br><b>Zusammenarbeit</b>                                                      |
| vom Interviewer thematisiert, vom Befragten konkretisiert | adäquate, flexible Strukturen bzw. Institutionalisierungen zwecks Standardisierung schaffen, Community-Aufbau durch Integrationsfiguren, Erfordernisse an Annotationssprachen zusammen definieren | wichtig, muss sein, es ist Unsinn, wenn jeder alles neu erfindet | Produktion/Manipulation                          | \I22-15\ | K 5.1d<br>Standards, TEI, Unabhängigkeit von Datenformaten<br><br><b>Austausch von Inhalten und Werkzeugen</b><br><br>und<br><br>Community-Building erforderlich, Umdenken erforderlich, durch Überzeugungsarbeit, |

## I22 Extraktion

|                                                           |                                                                                                                                                                                              |                                                               |                         |          |                                                                                                                                                                                |
|-----------------------------------------------------------|----------------------------------------------------------------------------------------------------------------------------------------------------------------------------------------------|---------------------------------------------------------------|-------------------------|----------|--------------------------------------------------------------------------------------------------------------------------------------------------------------------------------|
|                                                           |                                                                                                                                                                                              |                                                               |                         |          | Veranstaltungen und Erfahrungsaustausch anregen<br><br><b>Community-Building-Aspekte</b>                                                                                       |
| vom Interviewer thematisiert, vom Befragten konkretisiert | Einbindung in die Lehre, Verknüpfung mit Projekten als Teil des Gesamtkonzepts, Nachwuchsgewinnung, Community-Aufbau, Integration                                                            | funktioniert gut, mehr Studenten, langsam fließt etwas zurück |                         | \I22-16\ | Community-Building erforderlich, Umdenken erforderlich, durch Überzeugungsarbeit, Veranstaltungen und Erfahrungsaustausch anregen<br><br><b>Community-Building-Aspekte</b>     |
| vom Interviewer thematisiert, vom Befragten konkretisiert | interdisziplinäre Synergien durch Austausch auf Auszeichnungsebene                                                                                                                           | unbedingt, schon immer gesagt, großes Potenzial               | Produktion/Manipulation | \I22-18\ | K 5.2c<br>Interdisziplinäre Zusammenarbeit<br><br><b>Zusammenarbeit</b>                                                                                                        |
| selbst thematisiert                                       | Standardisierung von Workflows, Community-Building auch interdisziplinär, Austausch von Werkzeugen - in einem flexiblen Rahmen, in dem gleichzeitig nicht jeder die Welt neu erschaffen muss | größter Fortschritt, den TG ermöglichen könnte                | Produktion/Manipulation | \I22-19\ | K 5.1c<br>Austausch von Arbeitsmitteln (Tools, Formaten, Skripten usw.) und<br>K 5.1d<br>Standards, TEI, Unabhängigkeit von Datenformaten<br><br><b>Austausch von Inhalten</b> |

|                                        |                                                                                                                                                                                                                                                                                                                                                                                                                                                                                                                                |                                                                   |                                              |               | <b>und Werkzeugen</b>                                                                                                                                                                                                                                                                                                 |
|----------------------------------------|--------------------------------------------------------------------------------------------------------------------------------------------------------------------------------------------------------------------------------------------------------------------------------------------------------------------------------------------------------------------------------------------------------------------------------------------------------------------------------------------------------------------------------|-------------------------------------------------------------------|----------------------------------------------|---------------|-----------------------------------------------------------------------------------------------------------------------------------------------------------------------------------------------------------------------------------------------------------------------------------------------------------------------|
| <b>K 6<br/>Organisation/Verwaltung</b> |                                                                                                                                                                                                                                                                                                                                                                                                                                                                                                                                |                                                                   |                                              |               |                                                                                                                                                                                                                                                                                                                       |
| <i>Benennung</i>                       | <i>Beschreibung</i>                                                                                                                                                                                                                                                                                                                                                                                                                                                                                                            | <i>Bewertung</i>                                                  | <i>Bezug</i>                                 | <i>Quelle</i> | <i>Reduktion</i>                                                                                                                                                                                                                                                                                                      |
| selbst thematisiert                    | filebasierte Strukturierung von Informationen im System, Gegenmodell mit FEDORA objektorientiert, unterschiedliche Datenströme zu einem Objekt zusammenfassen, darauf basierend Methoden definieren und so Inhalte erschließen, logische Einheiten von Transliterationen als TEI, Bildern als Zip und über XSLT-Transformation zu einer HTML- oder PDF-Seite, außerdem Zugriffsrechte auf die unterschiedlichen Entitäten eines Objekts definieren, Objekt-Typen mit Grundstrukturen definieren, auch für Publikation relevant | zu stark filebasiert, müsste in Richtung Objektorientierung gehen | Kollaboration/Kooperation, Rezeption/Zugriff | \I22-4\       | K 6.1b<br>Datenspeicherung und –verwaltung, Langzeitarchivierung, verbunden mit Bearbeitungsmöglichkeiten und Nachnutzung<br><br><b>Organisation und Verwaltung von Inhalten</b><br><br>und<br><br>K 6.2a<br>Workflow-Organisation, Projekt-Verwaltung<br><br><b>Organisation und Verwaltung von Arbeitsprozessen</b> |
| selbst thematisiert                    | Archiv als Datenbasis aus TEI-modelliertem Inhalt und Referenzen auf Stylesheets zur Transformation, aus der dynamisch Websites und PDFs generiert werden,                                                                                                                                                                                                                                                                                                                                                                     | Vorteil, positiv                                                  |                                              | \I22-5\       | K 6.1b<br>Datenspeicherung und –verwaltung, Langzeitarchivierung, verbunden mit Bearbeitungsmöglichkeiten und                                                                                                                                                                                                         |

## I22 Extraktion

|                     |                                                                                                                                                                                                                                                                                                                                                                                       |                                                                                             |                           |          |                                                                                                                                                                                  |
|---------------------|---------------------------------------------------------------------------------------------------------------------------------------------------------------------------------------------------------------------------------------------------------------------------------------------------------------------------------------------------------------------------------------|---------------------------------------------------------------------------------------------|---------------------------|----------|----------------------------------------------------------------------------------------------------------------------------------------------------------------------------------|
|                     | Trennung von Inhalt und Repräsentation, Vorteil: Inhalt schon erstellen, bevor Layout geklärt ist, gleichzeitige Veränderung von tausenden Dokumenten möglich                                                                                                                                                                                                                         |                                                                                             |                           |          | Nachnutzung und<br>K 6.1d<br>Eigene Sichtbarkeit, Publikationsmöglichkeit<br><br><b>Organisation und Verwaltung von Inhalten</b>                                                 |
| selbst thematisiert | Nachhaltigkeit selbstreferenzielle Dokumente, die alle Informationen enthalten, die zum Verständnis notwendig sind, Ressentiments von Fachwissenschaftlern: gedrucktes Buch liegt vor, digitale Strukturen können verschwinden, Hybridedition in einer Übergangsphase, in der Vertrauen wachsen kann, nachhaltige Zitierbarkeit digitaler Ressourcen durch z.B. Persistent Identifier | wichtige Aspekte in einem digitalen Archiv, da wird es hingegen, aber es ist ein langer Weg | Rezeption/Zugriff         | \I22-8\  | K 6.1b<br>Datenspeicherung und –verwaltung, Langzeitarchivierung, verbunden mit Bearbeitungsmöglichkeiten und Nachnutzung<br><br><b>Organisation und Verwaltung von Inhalten</b> |
| selbst thematisiert | Versionierung von Dokumenten                                                                                                                                                                                                                                                                                                                                                          | ganz wichtiger Aspekt                                                                       | Kollaboration/Kooperation | \I22-11\ | K 6.1a<br>Versionenverwaltung<br><br><b>Organisation und Verwaltung von Inhalten</b>                                                                                             |

## I22 Extraktion

|                     |                                                                                                                                                                |                    |  |           |                                                                                                                                                                                                                         |
|---------------------|----------------------------------------------------------------------------------------------------------------------------------------------------------------|--------------------|--|-----------|-------------------------------------------------------------------------------------------------------------------------------------------------------------------------------------------------------------------------|
| selbst thematisiert | Akzeptanz im Hinblick auf Datensicherheit, Export muss ermöglicht werden, nachhaltige Zitierbarkeit auch von verschiedenen Entitäten, z.B. einzelne Münze usw. | größte Problematik |  | \\I22-20\ | <p>K 6.1c<br/>Adressierung,<br/>Zitierbarkeit,<br/>Urheberrecht,<br/>Leistungsanerkennung<br/>und<br/>K 6.1e<br/>Export und Löschen von<br/>Inhalten</p> <p><b>Organisation und<br/>Verwaltung von<br/>Inhalten</b></p> |
|---------------------|----------------------------------------------------------------------------------------------------------------------------------------------------------------|--------------------|--|-----------|-------------------------------------------------------------------------------------------------------------------------------------------------------------------------------------------------------------------------|
