# Supplementary material
Source: publisher site journal article supplement (https://www.degruyterbrill.com/publication/isbn/9783110463927/downloadAsset/9783110463927_Extraktionen_Reduktionen_fallbezogen.zip)
Supplement: Supplementary file 16 [file I23 Extraktion und Reduktion.pdf › fallbezogene Extraktionen und Reduktionen/I23 Extraktion und Reduktion.pdf]

|                                                                                          |                                                                                                                                                                                                |                                                                                                                                                                                                                                                                                       |                                               |               |  |
|------------------------------------------------------------------------------------------|------------------------------------------------------------------------------------------------------------------------------------------------------------------------------------------------|---------------------------------------------------------------------------------------------------------------------------------------------------------------------------------------------------------------------------------------------------------------------------------------|-----------------------------------------------|---------------|--|
| <b>TÄTIGKEITEN UND EDV-ERFAHRUNG</b>                                                     |                                                                                                                                                                                                |                                                                                                                                                                                                                                                                                       |                                               |               |  |
| <b>Tätigkeiten</b>                                                                       |                                                                                                                                                                                                |                                                                                                                                                                                                                                                                                       |                                               |               |  |
| <i>Gegenstände</i>                                                                       | <i>Methoden/Verfahren</i>                                                                                                                                                                      | <i>Ziele/Fragen</i>                                                                                                                                                                                                                                                                   | <i>Institutioneller Rahmen</i>                | <i>Quelle</i> |  |
| Edition, mehr praktisch als theoretisch, z.B. frühneuhochdeutsche Gebrauchshandschriften | dynamische Editionsweise, mehrschichtiges Editionsverfahren, zuerst handschriftennahe Transliteration, Schicht um Schicht Informationen abgetragen bis hin zu einer diplomatischen Lesefassung | verschiedene Perspektiven auf den Überlieferungszeugen bieten - mit unterschiedlichen Informationsgehalten, möglichst viele Informationen über die handschriftliche Oberfläche für den Paleographen, abgespeckte Version zur Erfassung des Textsinns für den Literaturwissenschaftler | Universität, Forschungs- bzw. Editionsprojekt | \I23-1\       |  |
| Editionen                                                                                | Superskripte werden gesondert transliteriert, nicht im Verbund mit dem Basisgraphen, auf die Verbindung wird hingewiesen                                                                       | genauere, komplexere Transliteration                                                                                                                                                                                                                                                  | Universität, Forschungs- bzw. Editionsprojekt | \I23-5\       |  |
| <b>Erfahrung</b>                                                                         |                                                                                                                                                                                                |                                                                                                                                                                                                                                                                                       |                                               |               |  |
|                                                                                          | <i>Beschreibung</i>                                                                                                                                                                            | <i>Bewertung</i>                                                                                                                                                                                                                                                                      |                                               | <i>Quelle</i> |  |
|                                                                                          | hauptsächlich WinWord genutzt                                                                                                                                                                  | WinWord an seine Grenzen gebracht, mit sehr vielen Tricks gearbeitet                                                                                                                                                                                                                  |                                               | \I23-1\       |  |
|                                                                                          | mit XML beschäftigt                                                                                                                                                                            | versucht es zu lernen                                                                                                                                                                                                                                                                 |                                               | \I23-3\       |  |
| <b>BEDARFSKATEGORIEN</b>                                                                 |                                                                                                                                                                                                |                                                                                                                                                                                                                                                                                       |                                               |               |  |
| <b>K 1</b>                                                                               |                                                                                                                                                                                                |                                                                                                                                                                                                                                                                                       |                                               |               |  |
| <b>Bedienbarkeit</b>                                                                     |                                                                                                                                                                                                |                                                                                                                                                                                                                                                                                       |                                               |               |  |

## I23 Extraktion

| <i>Benennung</i>                                          | <i>Beschreibung</i>                                                                                                                                                                                 | <i>Bewertung</i>       | <i>Bezug</i>                               | <i>Quelle</i> | <i>Reduktion</i>                                                                                                                                                                          |
|-----------------------------------------------------------|-----------------------------------------------------------------------------------------------------------------------------------------------------------------------------------------------------|------------------------|--------------------------------------------|---------------|-------------------------------------------------------------------------------------------------------------------------------------------------------------------------------------------|
| selbst thematisiert                                       | Befürchtung, ohne WYSIWYG die Übersicht zu verlieren, Annahme, dass TG an einer Oberfläche arbeitet, die dem User Codierung abnimmt, gewohntes Arbeiten mit XML-Codierung im Hintergrund ermöglicht | Hürde, Herausforderung | Produktion/Manipulation, Rezeption/Zugriff | \I23-4\       | K 1.4b<br>Arbeiten wie in der „normalen“ Textverarbeitung ermöglichen, Vermeidung von spitzen Klammern, XML-Generierung im Hintergrund<br><br><b>Bedienbarkeit der Auszeichnungsebene</b> |
| selbst thematisiert                                       | Workshop war zu kurz, um alles kennen zu lernen                                                                                                                                                     | zu kurz                | Produktion/Manipulation                    | \I23-10\      | K 1.1h<br>schwer zu beurteilen, weil im Workshop geführt bzw. nur an einem Bsp. gearbeitet wurde, zu wenig Zeit war, Tool nicht fertig war<br><br><b>Benutzerführung / Erlernbarkeit</b>  |
| vom Interviewer thematisiert, vom Befragten konkretisiert | ausführliches Testen des XML-Editors im Workshop nicht möglich, Tool war noch nicht fertig, fertiger Text wurde importiert                                                                          | leider                 | Produktion/Manipulation                    | \I23-11\      | K 1.1h<br>schwer zu beurteilen, weil im Workshop geführt bzw. nur an einem Bsp. gearbeitet wurde, zu wenig Zeit war, Tool nicht fertig war<br><br><b>Benutzerführung / Erlernbarkeit</b>  |

## I23 Extraktion

|                                                           |                                                                                                                                     |                                                                                                                |                                                   |          |                                                                                                                                                                                                                                         |
|-----------------------------------------------------------|-------------------------------------------------------------------------------------------------------------------------------------|----------------------------------------------------------------------------------------------------------------|---------------------------------------------------|----------|-----------------------------------------------------------------------------------------------------------------------------------------------------------------------------------------------------------------------------------------|
| vom Interviewer thematisiert, vom Befragten konkretisiert | einige technische Pannen                                                                                                            | Pannen sind bei Tests normal, irritierend, man fragt sich, woran es liegt, ob man selbst schuld ist oder nicht |                                                   | \I23-15\ | K 1.3a<br>Kinderkrankheiten sind normal, ist noch in der Entwicklung<br><br><b>Systemstabilität, Programmierfehler</b>                                                                                                                  |
| selbst thematisiert                                       | Farbgestaltung der Oberfläche so, dass man einige Eingabefelder nicht als solche erkannt hat, z.B. bei der Beschreibung des Objekts | Verbesserungsbedarf                                                                                            | Produktion/Manipulation, Rezeption/Zugriff        | \I23-15\ | K 1.2b<br>Lesbarkeit/Sichtbarkeit am Bildschirm je nach Konfiguration nicht immer gut<br><br><b>Orientierung / Übersichtlichkeit / Oberflächen-gestaltung</b>                                                                           |
| selbst thematisiert                                       | Hohe Anzahl an Betreuern und Betreuerinnen beim Workshop, Schulungen in Kleingruppen                                                | gut, sinnvoll                                                                                                  |                                                   | \I23-15\ | K 1.1g<br>Schulungen für technisch weniger versierte Nutzer, Schritt-für-Schritt-Anleitung, Heranführen/Einbinden der Community, didaktischer Prozess, Mehrwerte vermitteln, Testprojekte<br><br><b>Benutzerführung / Erlernbarkeit</b> |
| vom Interviewer thematisiert, vom Befragten               | bequeme Oberfläche, für die der Nutzer keine Kenntnisse                                                                             | Schlaraffenland, weiß nicht, inwieweit es                                                                      | Produktion/Manipulation, Kollaboration/Kooperatio | \I23-17\ | K 1.4a<br>XML/TEI ist eine Hürde,                                                                                                                                                                                                       |

## I23 Extraktion

|                                                           |                                                                                                                                 |                                                                                                                                                                                                                                                                             |                         |               |                                                                                                                                                                                                                                                      |
|-----------------------------------------------------------|---------------------------------------------------------------------------------------------------------------------------------|-----------------------------------------------------------------------------------------------------------------------------------------------------------------------------------------------------------------------------------------------------------------------------|-------------------------|---------------|------------------------------------------------------------------------------------------------------------------------------------------------------------------------------------------------------------------------------------------------------|
| konkretisiert                                             | wie XML haben müsste                                                                                                            | sich verwirklichen lässt, außerdem andererseits das Gefühl, es ist nicht mehr mein Text, wenn man die Codierung aus der Hand gibt, Editor sollte XML bis zu einem bestimmten Punkt können - zumindest passiv beherrschen, Abhängigkeit schränkt Forschungsmöglichkeiten ein | n                       |               | Unterstützung durch das System ist notwendig, Heranführen / Hilfemenu, Reduzierung der Schwelle, aber keine Vermeidung von spitzen Klammern, Komplexität abbilden, fachliche Mehrwerte vermitteln<br><br><b>Bedienbarkeit der Auszeichnungsebene</b> |
| vom Interviewer thematisiert, vom Befragten konkretisiert | Kürze des Workshop, noch nicht alles kennen gelernt, was TG kann                                                                | kann noch nicht beurteilen, was evtl. Probleme sind, nur kleiner Pannen feststellen, die aber als normal bewertet werden                                                                                                                                                    |                         | \I23-22\      | K 1.1h schwer zu beurteilen, weil im Workshop geführt bzw. nur an einem Bsp. gearbeitet wurde, zu wenig Zeit war, Tool nicht fertig war<br><br><b>Benutzerführung / Erlernbarkeit</b>                                                                |
| <b>K 2</b>                                                |                                                                                                                                 |                                                                                                                                                                                                                                                                             |                         |               |                                                                                                                                                                                                                                                      |
| <b>Rezeption/Zugriff</b>                                  |                                                                                                                                 |                                                                                                                                                                                                                                                                             |                         |               |                                                                                                                                                                                                                                                      |
| <i>Benennung</i>                                          | <i>Beschreibung</i>                                                                                                             | <i>Bewertung</i>                                                                                                                                                                                                                                                            | <i>Bezug</i>            | <i>Quelle</i> | <i>Reduktion</i>                                                                                                                                                                                                                                     |
| selbst thematisiert                                       | durch XML-Auszeichnung lassen sich Daten besser strukturieren und Informationen leichter finden bzw. nicht benötigte ausblenden | Vorteile von XML                                                                                                                                                                                                                                                            | Produktion/Manipulation | \I23-3\       | K 2.2a Spezifizierbarkeit des Zugriffs, fachspezifische Zugriffsmöglichkeiten, verschiedene Zugriffsperspektiven                                                                                                                                     |

|                                                           |                                                                                                                                                                                                                                         |                                        |                         |          |                                                                                                                                                                                                                                                                                                         |
|-----------------------------------------------------------|-----------------------------------------------------------------------------------------------------------------------------------------------------------------------------------------------------------------------------------------|----------------------------------------|-------------------------|----------|---------------------------------------------------------------------------------------------------------------------------------------------------------------------------------------------------------------------------------------------------------------------------------------------------------|
|                                                           |                                                                                                                                                                                                                                         |                                        |                         |          | durch Auszeichnungen und Präsentationsformen (z.B. parallele Ansicht von Faksimile und Transkription im TBLE)<br><br><b>Zugriffsformen, Rezeptions- und Recherche-möglichkeiten</b>                                                                                                                     |
| selbst thematisiert                                       | Superskripte werden typographisch mit Unicode zur Darstellung gebracht, die Handschrift wird ikonisch wiedergegeben, Handschrift und Transliteration in zwei Spalten auf dem Bildschirm sichtbar, braucht keine Transliterationstabelle | Vorteil der elektronischen Darstellung | Produktion/Manipulation | \I23-6\  | K 2.2a<br>Spezifizierbarkeit des Zugriffs, fachspezifische Zugriffsmöglichkeiten, verschiedene Zugriffsperspektiven durch Auszeichnungen und Präsentationsformen (z.B. parallele Ansicht von Faksimile und Transkription im TBLE)<br><br><b>Zugriffsformen, Rezeptions- und Recherche-möglichkeiten</b> |
| vom Interviewer thematisiert, vom Befragten konkretisiert | TG als Archiv für Texte aller Art, zuverlässige Transliterationen, philologisch verantwortete Editionen, Zugang zu Texten für die Forschung und auch für den Unterricht, Problem                                                        | Wäre ein Traum, zentrales Problem      | Produktion/Manipulation | \I23-20\ | K 2.1a<br>kostenloser Zugriff auf unterschiedliche Repositorien bzw. Ressourcen (z.B. Wörterbücher), Quellen und Ausgaben/ Editionen,                                                                                                                                                                   |

## I23 Extraktion

|                                                           |                                                                                                                                                                       |                            |              |               |                                                                                                                                                                                                                                                                          |
|-----------------------------------------------------------|-----------------------------------------------------------------------------------------------------------------------------------------------------------------------|----------------------------|--------------|---------------|--------------------------------------------------------------------------------------------------------------------------------------------------------------------------------------------------------------------------------------------------------------------------|
|                                                           | schwerzugängliche Texte,                                                                                                                                              |                            |              |               | Vergleichsmöglichkeiten mit anderen Projekten/<br>Quellen, orts- und rechnerunabhängiger Zugriff<br><br><b>Zugriff auf Inhalte</b>                                                                                                                                       |
| selbst thematisiert                                       | freie kostenlose Verfügbarkeit von Ressourcen                                                                                                                         | einer der größten Vorteile |              | \I23-21\      | K 2.1a<br>kostenloser Zugriff auf unterschiedliche Repositorien bzw. Ressourcen (z.B. Wörterbücher), Quellen und Ausgaben/ Editionen, Vergleichsmöglichkeiten mit anderen Projekten/<br>Quellen, orts- und rechnerunabhängiger Zugriff<br><br><b>Zugriff auf Inhalte</b> |
| <b>K 3</b><br><b>Produktion/Manipulation</b>              |                                                                                                                                                                       |                            |              |               |                                                                                                                                                                                                                                                                          |
| <i>Benennung</i>                                          | <i>Beschreibung</i>                                                                                                                                                   | <i>Bewertung</i>           | <i>Bezug</i> | <i>Quelle</i> | <i>Reduktion</i>                                                                                                                                                                                                                                                         |
| vom Interviewer thematisiert, vom Befragten konkretisiert | vier Schichten zur Darstellung bringen: Faksimile, Basistransliteration als "deskriptiven Abdruck", der alles sprachrelevante wiedergibt, abgespeckte Version für den |                            |              | \I23-2\       | K 3.2b<br>Unterschiede durch Textvergleich (Kollationierung, TBLE) visualisieren, Schreiberhände vergleichen, Textgenese,                                                                                                                                                |

## I23 Extraktion

|                     |                                                                                                                                                                                                                                      |                                                                               |                                            |         |                                                                                                                                                                                                                                                                                                                   |
|---------------------|--------------------------------------------------------------------------------------------------------------------------------------------------------------------------------------------------------------------------------------|-------------------------------------------------------------------------------|--------------------------------------------|---------|-------------------------------------------------------------------------------------------------------------------------------------------------------------------------------------------------------------------------------------------------------------------------------------------------------------------|
|                     | "elektronischen Gebrauch" ohne Auszeichnung der Buchstabenformen, aber mit Konzentration auf die Superskripte, Dehnungszeichen, Umlautzeichen - und eine hyperdiplomatische Version                                                  |                                                                               |                                            |         | Entwicklungsprozess rekonstruieren und darstellen, Schichten und Räumlichkeit darstellen, multiperspektivischen Zugang schaffen<br><br><b>Analyse- und Visualisierungsmöglichkeiten</b>                                                                                                                           |
| selbst thematisiert | mit XML alle Schichten in einer Version machbar, für Auswertungen besser und zuverlässiger, bessere Korrekturmöglichkeiten, Daten besser strukturiert verwalten, Informationen schnell finden und - wenn nicht benötigt - ausblenden | Vorteile von XML, Potenzial, Tätigkeit aber auch für XML eine Herausforderung | Rezeption/Zugriff, Organisation/Verwaltung | \I23-3\ | K 3.2b<br>Unterschiede durch Textvergleich (Kollationierung, TBLE) visualisieren, Schreiberhände vergleichen, Textgenese, Entwicklungsprozess rekonstruieren und darstellen, Schichten und Räumlichkeit darstellen, multiperspektivischen Zugang schaffen<br><br><b>Analyse- und Visualisierungsmöglichkeiten</b> |
| selbst thematisiert | technischer Umstieg auf XML, nachträglich Material in XML überführen, gleichzeitig Transliterationsregeln beibehalten, möglicherweise mit TG, Rohtransliterationen                                                                   | Viele Vorteile, Befürchtung, ohne WYSIWYG die Übersicht zu verlieren          | Bedienbarkeit                              | \I23-4\ | K 3.1b<br>XML-Auszeichnungs- bzw. Produktionshilfe, Tools zur digitalen Herstellung und Verfügbarmachung von                                                                                                                                                                                                      |

## I23 Extraktion

|                                                           |                                                                                                                                                                               |                                                 |  |         |                                                                                                                                                                                                                                   |
|-----------------------------------------------------------|-------------------------------------------------------------------------------------------------------------------------------------------------------------------------------|-------------------------------------------------|--|---------|-----------------------------------------------------------------------------------------------------------------------------------------------------------------------------------------------------------------------------------|
|                                                           | in WinWord vorhanden --> importieren, verfeinerte Annotationen mit TG eingeben                                                                                                |                                                 |  |         | Texten, XML-Schemata vorgefertigt für verschiedene individuelle Bedürfnisse, Konvertierung in XML/TEI, Baseline Encoding, Streaming Editor, Unterstützung bei zunächst geringerer Auszeichnungstiefe<br><br><b>XML-Produktion</b> |
| selbst thematisiert                                       | TG-TBLE arbeitet auf Wort-Ebene, Bedarf an Ermöglichung tiefergehender Transliteration, man braucht drei Zeilen, um so einen Compound-Graphen in XML darzustellen             | problematisch, komplizierter Code, Fehlergefahr |  | \I23-5\ | K 3.3d Verknüpfungsmöglichkeiten Text-Bild, Transkriptions-/Faksimile-Ansicht<br><br><b>Verknüpfungsmöglichkeiten und deren Visualisierung</b>                                                                                    |
| vom Interviewer thematisiert, vom Befragten konkretisiert | es gibt schon ein XML-Schema für diese Editionsweise, für den deskriptiven Abdruck, Unicode-Verwendung, typographische Zeichen für Superskripte müssen noch geschaffen werden | Schema als Vorteil                              |  | \I23-6\ | K 3.1b XML-Auszeichnungs- bzw. Produktionshilfe, Tools zur digitalen Herstellung und Verfügbarmachung von Texten, XML-Schemata vorgefertigt für verschiedene individuelle Bedürfnisse, Konvertierung in XML/TEI, Baseline         |



## I23 Extraktion

|                                                           |                                                                                                                                                                                                                                                                                                                                                                     |                                  |                   |         |                                                                                                                                                                                                                                                                                                       |
|-----------------------------------------------------------|---------------------------------------------------------------------------------------------------------------------------------------------------------------------------------------------------------------------------------------------------------------------------------------------------------------------------------------------------------------------|----------------------------------|-------------------|---------|-------------------------------------------------------------------------------------------------------------------------------------------------------------------------------------------------------------------------------------------------------------------------------------------------------|
|                                                           |                                                                                                                                                                                                                                                                                                                                                                     |                                  |                   |         | <p>Encoding, Streaming Editor, Unterstützung bei zunächst geringerer Auszeichnungstiefe</p> <p><b>XML-Produktion</b></p>                                                                                                                                                                              |
| selbst thematisiert                                       | <p>Auszeichnungstiefe muss der Editor schon selbst festlegen, aber Schema mit Trennung von Basisgraph und Superskript lässt sich als Grundgerüst auf andere Fälle übertragen, verbindliche Codes für alle Buchstabenvarianten sind aber schwer vorstellbar, Codierung zur Feststellung von charakteristischen Details im Hinblick auf Schreiberpersönlichkeiten</p> | Vorteil von XML-Schema           |                   | \I23-7\ | <p>K 3.1c<br/>Auszeichnungsmöglichkeiten / Informationsanreicherung zur Bearbeitung neuer Fragestellungen, tiefere Auszeichnung, spezifischere Auszeichnung je nach Forschungsinteresse (z.B. Musikwissenschaft), semantische Auszeichnung, Informationsmodellierung</p> <p><b>XML-Produktion</b></p> |
| vom Interviewer thematisiert, vom Befragten konkretisiert | <p>dem TBLE ähnliches Tool entwickelt, Verlinkung einzelner Buchstaben des Faksimiles mit der Transliteration, Wörter und Buchstabenverbindungen und auch i-Punkt-Entfernungen lassen sich auswerten, Schriftproben in Handschriften vergleichen, Buchstabenform usw. --&gt;</p>                                                                                    | neue Möglichkeiten durch DH-Tool | Rezeption/Zugriff | \I23-8\ | <p>K 3.2b<br/>Unterschiede durch Textvergleich (Kollationierung, TBLE) visualisieren, Schreiberhände vergleichen, Textgenese, Entwicklungsprozess rekonstruieren und darstellen, Schichten und Räumlichkeit darstellen,</p>                                                                           |

## I23 Extraktion

|                                                           |                                                                                                                                                                                                                                                                                               |                                                                             |                                  |          |                                                                                                                                                                                                                                                                   |
|-----------------------------------------------------------|-----------------------------------------------------------------------------------------------------------------------------------------------------------------------------------------------------------------------------------------------------------------------------------------------|-----------------------------------------------------------------------------|----------------------------------|----------|-------------------------------------------------------------------------------------------------------------------------------------------------------------------------------------------------------------------------------------------------------------------|
|                                                           | Schreiberpersönlichkeiten, aber keine Blackbox, immer noch für Menschen sichtbar machen durch Zoom z. B., aber auch mathematisch-algorithmischer Beweis, Koordinaten des getrennt codierten i-Punkts erfassen und vergleichend messen                                                         |                                                                             |                                  |          | multiperspektivischen Zugang schaffen<br><br><b>Analyse- und Visualisierungsmöglichkeiten</b><br><br>und<br><br>K 3.3d<br>Verknüpfungsmöglichkeiten Text-Bild, Transkriptions-/Faksimile-Ansicht<br><br><b>Verknüpfungsmöglichkeiten und deren Visualisierung</b> |
| vom Interviewer thematisiert, vom Befragten konkretisiert | einfachere und zuverlässigere Herstellung von Wortindizes und Wörterbüchern, Herstellung einerseits einfacher als früher ohne Computer, andererseits höheres Bedürfnis, feiner und aufwendiger zu transliterieren, statistische Messbarkeit zusätzlich zur Erfassung mit dem menschliche Auge | großer Vorteil im Hinblick auf Auswertungsmöglichkeiten und Zuverlässigkeit | Rezeption/Zugriff, Bedienbarkeit | \I23-9\  | K 3.2c<br>Visualisierung von Auszeichnungen, Worthäufigkeiten, Kollokationen, Themaerschließung, Mustererkennung<br><br><b>Analyse- und Visualisierungsmöglichkeiten</b>                                                                                          |
| vom Interviewer thematisiert, vom Befragten konkretisiert | XML-Editor zur Texteingabe war noch nicht fertig, könnte WinWord teils ablösen, vielleicht um die Möglichkeit                                                                                                                                                                                 | Editor hätte mich am meisten interessiert, war aber nicht fertig            |                                  | \I23-10\ | K 3.1a<br>eigener XML-Editor ist nicht die Stärke von TextGrid, andere sind                                                                                                                                                                                       |

## I23 Extraktion

|                     |                                                                                             |        |               |          |                                                                                                                                                                                                                                                                                                                                                                                              |
|---------------------|---------------------------------------------------------------------------------------------|--------|---------------|----------|----------------------------------------------------------------------------------------------------------------------------------------------------------------------------------------------------------------------------------------------------------------------------------------------------------------------------------------------------------------------------------------------|
|                     | der Eingabe von Superskripten erweitern, nur Projektverwaltung und TBLE als Workshop-Inhalt |        |               |          | besser, nicht der richtige Schwerpunkt und<br>K 3.1b<br>XML-Auszeichnungs- bzw. Produktionshilfe, Tools zur digitalen Herstellung und Verfügbarmachung von Texten, XML-Schemata vorgefertigt für verschiedene individuelle Bedürfnisse, Konvertierung in XML/TEI, Baseline Encoding, Streaming Editor, Unterstützung bei zunächst geringerer Auszeichnungstiefe<br><br><b>XML-Produktion</b> |
| selbst thematisiert | Pop-Up-Fenster mit eigenen Codes würde das Arbeiten erleichtern und beschleunigen           | Wunsch | Bedienbarkeit | \I23-11\ | K 3.1b<br>XML-Auszeichnungs- bzw. Produktionshilfe, Tools zur digitalen Herstellung und Verfügbarmachung von Texten, XML-Schemata vorgefertigt für verschiedene individuelle Bedürfnisse, Konvertierung in XML/TEI, Baseline Encoding, Streaming                                                                                                                                             |

## I23 Extraktion

|                                                           |                                                                                                                                                                                                             |                                                                                                            |                             |               |                                                                                                                                                                                                                                            |
|-----------------------------------------------------------|-------------------------------------------------------------------------------------------------------------------------------------------------------------------------------------------------------------|------------------------------------------------------------------------------------------------------------|-----------------------------|---------------|--------------------------------------------------------------------------------------------------------------------------------------------------------------------------------------------------------------------------------------------|
|                                                           |                                                                                                                                                                                                             |                                                                                                            |                             |               | Editor, Unterstützung bei zunächst geringerer Auszeichnungstiefe<br><br><b>XML-Produktion</b>                                                                                                                                              |
| selbst thematisiert                                       | TBLE zur Verlinkung mit Belegstellen, Parallelbelegen, mit dem Lexikon, Vergleich mit dem Bild, Kreativität vielleicht erst angestoßen, Möglichkeit, bis in die Schreiberhändedifferenzierung hineinzugehen | Forschungsmöglichkeiten noch nicht ganz zu Ende gedacht, aber bedeutet auch so schon eine Revolutionierung |                             | \I23-13\      | K 3.3d<br>Verknüpfungsmöglichkeiten Text-Bild, Transkriptions-/Faksimile-Ansicht<br><br><b>Verknüpfungsmöglichkeiten und deren Visualisierung</b>                                                                                          |
| selbst thematisiert                                       | Möglichkeit der Verlinkung eines Lexikons                                                                                                                                                                   | großartig, für die Forschung eine ganz wesentliche Funktion, auch für die Sprachwissenschaft               | Kollaboration/Kooperationen | \I23-14\      | K 3.3a<br>Verknüpfungsmöglichkeiten Text-Text (z.B. editionswiss. Kommentarfunktionen, Varianten verknüpfen, Apparat, Quellen/Referenzen, Register, Wörterbücher, Briefe)<br><br><b>Verknüpfungsmöglichkeiten und deren Visualisierung</b> |
| <b>K 4</b><br><b>Modularität/</b><br><b>Anpassbarkeit</b> |                                                                                                                                                                                                             |                                                                                                            |                             |               |                                                                                                                                                                                                                                            |
| <i>Benennung</i>                                          | <i>Beschreibung</i>                                                                                                                                                                                         | <i>Bewertung</i>                                                                                           | <i>Bezug</i>                | <i>Quelle</i> | <i>Reduktion</i>                                                                                                                                                                                                                           |

## I23 Extraktion

|                                                           |                                                                                                                                                                                                                                                                                                                                             |                            |                           |          |                                                                                                                                                          |
|-----------------------------------------------------------|---------------------------------------------------------------------------------------------------------------------------------------------------------------------------------------------------------------------------------------------------------------------------------------------------------------------------------------------|----------------------------|---------------------------|----------|----------------------------------------------------------------------------------------------------------------------------------------------------------|
| selbst thematisiert                                       | Erweiterung des Editors um die Möglichkeit der Eingabe von Superskripten                                                                                                                                                                                                                                                                    | Wunsch                     | Produktion/Manipulation   | \I23-10\ | K 4.2b<br>Anpassbarkeit von Tools an das jeweilige Projekt / die jeweiligen Gegenstände<br><br><b>Tools und Services</b>                                 |
| selbst thematisiert                                       | man müsste den Editor anpassen können, verändern oder etwas hinzufügen, in einem eingegebenen Dokument oder in der Codierung, es gibt aber mehr Buchstabenvarianten als man vernünftig auseinander zu haltende Codes entwerfen kann, selber ein Set an Codes für einen Editionsfall zusammenstellen können, andererseits Standards sinnvoll | Wunsch                     | Kollaboration/Kooperation | \I23-11\ | K 4.2b<br>Anpassbarkeit von Tools an das jeweilige Projekt / die jeweiligen Gegenstände<br><br><b>Tools und Services</b>                                 |
| vom Interviewer thematisiert, vom Befragten konkretisiert | Flexibilität des Systems zur Erweiterung, Tools zurechtstutzen, für die Bequemlichkeit und im Hinblick auf komplizierte Bedürfnisse                                                                                                                                                                                                         | schon notwendig            | Produktion/Manipulation   | \I23-16\ | K 4.2a<br>Anschließbarkeit und Kombinierbarkeit von Tools und Services, auch von selbstentwickelten – modulares Konzept<br><br><b>Tools und Services</b> |
| selbst thematisiert                                       | Zusammenwirken von Komponenten, interaktiv erweiterbar                                                                                                                                                                                                                                                                                      | einer der größten Vorteile |                           | \I23-21\ | K 4.2a<br>Anschließbarkeit und Kombinierbarkeit von Tools und Services, auch                                                                             |

|                                          |                                                                                                                                                                                                |                                                                                                                    |                                        |               |                                                                                                                         |
|------------------------------------------|------------------------------------------------------------------------------------------------------------------------------------------------------------------------------------------------|--------------------------------------------------------------------------------------------------------------------|----------------------------------------|---------------|-------------------------------------------------------------------------------------------------------------------------|
|                                          |                                                                                                                                                                                                |                                                                                                                    |                                        |               | von selbstentwickelten –<br>modulares Konzept<br><br><b>Tools und Services</b>                                          |
| <b>K 5<br/>Kollaboration/Kooperation</b> |                                                                                                                                                                                                |                                                                                                                    |                                        |               |                                                                                                                         |
| <i>Benennung</i>                         | <i>Beschreibung</i>                                                                                                                                                                            | <i>Bewertung</i>                                                                                                   | <i>Bezug</i>                           | <i>Quelle</i> | <i>Reduktion</i>                                                                                                        |
| selbst thematisiert                      | Erweiterungen im Rahmen der TG-Gemeinschaft bewirken, eigene Codes vielleicht für andere Nutzer relevant, evtl. besser auf Standards einigen, andererseits viele spezielle Buchstabenvarianten | müsste man ausdiskutieren                                                                                          | Produktion/ Manipulation               | \I23-11\      | K 5.1d<br>Standards, TEI,<br>Unabhängigkeit von Datenformaten<br><br><b>Austausch von Inhalten und Werkzeugen</b>       |
| selbst thematisiert                      | TG verbindet z.B. mit der Lexikon-Verknüpfung wieder stärker die Literaturwissenschaft mit der Sprachwissenschaft                                                                              | großartig, wesentliche Funktion                                                                                    | Produktion/ Manipulation               | \I23-14\      | K 5.2c<br>Interdisziplinäre Zusammenarbeit<br><br><b>Zusammenarbeit</b>                                                 |
| selbst thematisiert                      | bisher war das Problem, dass jeder seine eigene Edition machen musste, um seine individuellen Analysebedürfnisse zu befriedigen                                                                | zu lösendes Problem                                                                                                | Produktion/ Manipulation               | \I23-14\      | K 5.1a<br>Austausch von Ressourcen, Nachnutzung<br><br><b>Austausch von Inhalten und Werkzeugen</b>                     |
| selbst thematisiert                      | Codierung bzw. Transformation in XML durch andere, Tool-Entwicklung durch Kooperationspartner, die auch für die Anwendung gebraucht werden, z.B. beim                                          | Angst, selber danach nicht mehr damit umgehen zu können, Abhängigkeit wirkt einschränkend, Editor sollte in seinem | Produktion/Manipulation, Bedienbarkeit | \I23-17\      | K 5.2b<br>Zusammenarbeit zwischen Institutionen, Projekten, auch intern zwischen verschiedenen Stellen, mit Technikern, |

## I23 Extraktion

|                                                           |                                                                                                                                                                                                                            |                                                                                                                                                                                |                         |          |                                                                                                                                                                                                                                                                                                                |
|-----------------------------------------------------------|----------------------------------------------------------------------------------------------------------------------------------------------------------------------------------------------------------------------------|--------------------------------------------------------------------------------------------------------------------------------------------------------------------------------|-------------------------|----------|----------------------------------------------------------------------------------------------------------------------------------------------------------------------------------------------------------------------------------------------------------------------------------------------------------------|
|                                                           | Heraussuchen von Belegstellen mit dem Tool                                                                                                                                                                                 | Material manövrieren können                                                                                                                                                    |                         |          | Workflow<br><b>Zusammenarbeit</b>                                                                                                                                                                                                                                                                              |
| vom Interviewer thematisiert, vom Befragten konkretisiert | Kooperation am liebsten eng, auch räumlich mit Besprechungen, Möglichkeiten, voneinander zu lernen, strikte Aufgabentrennung ohne wechselseitigen Einblick hingegen schwierig                                              |                                                                                                                                                                                |                         | \I23-18\ | K 5.2b<br>Zusammenarbeit zwischen Institutionen, Projekten, auch intern zwischen verschiedenen Stellen, mit Technikern, Workflow<br><br><b>Zusammenarbeit</b>                                                                                                                                                  |
| vom Interviewer thematisiert, vom Befragten konkretisiert | Zusammenarbeit an einem Dokument, weiterarbeiten an einem Text in TG, der tiefer erschlossen werden soll, Informationen hinzufügen, Frage nach der Versionenverwaltung, neue Version oder Veränderung?, Urheberproblematik | sinnvoll, es müsste nicht jeder neu beginnen sondern könnte auf Bestehendem aufsetzen, kann sich die Umsetzung aber noch nicht vorstellen, verschiedene problematische Aspekte | Organisation/Verwaltung | \I23-19\ | K 5.1a<br>Austausch von Ressourcen, Nachnutzung<br><br><b>Austausch von Inhalten und Werkzeugen</b><br><br>und<br><br>K 5.2a<br>Zusammenarbeit in Teams von verschiedenen Orten aus, auch an einem Dokument, verteilte Bearbeitung verschiedener ‚Schichten‘ eines Dokuments usw.<br><br><b>Zusammenarbeit</b> |
| selbst thematisiert                                       | Ausrichtung auf webbasierte                                                                                                                                                                                                | einer der größten                                                                                                                                                              |                         | \I23-21\ | K 5.2b                                                                                                                                                                                                                                                                                                         |

## I23 Extraktion

|                                        |                                                                                                                    |                                                                               |              |               |                                                                                                                                                                                  |
|----------------------------------------|--------------------------------------------------------------------------------------------------------------------|-------------------------------------------------------------------------------|--------------|---------------|----------------------------------------------------------------------------------------------------------------------------------------------------------------------------------|
|                                        | internationale Zusammenarbeit                                                                                      | Vorteile                                                                      |              |               | Zusammenarbeit zwischen Institutionen, Projekten, auch intern zwischen verschiedenen Stellen, mit Technikern, Workflow<br><br><b>Zusammenarbeit</b>                              |
| <b>K 6<br/>Organisation/Verwaltung</b> |                                                                                                                    |                                                                               |              |               |                                                                                                                                                                                  |
| <i>Benennung</i>                       | <i>Beschreibung</i>                                                                                                | <i>Bewertung</i>                                                              | <i>Bezug</i> | <i>Quelle</i> | <i>Reduktion</i>                                                                                                                                                                 |
| selbst thematisiert                    | mit XML alle Schichten in einer Version machbar, Daten besser strukturiert verwalten                               | Vorteile von XML, Potenzial, Tätigkeit aber auch für XML eine Herausforderung |              | \I23-3\       | K 6.1b<br>Datenspeicherung und –verwaltung, Langzeitarchivierung, verbunden mit Bearbeitungsmöglichkeiten und Nachnutzung<br><br><b>Organisation und Verwaltung von Inhalten</b> |
| selbst thematisiert                    | Projekte anlegen, Dateiverzeichnis, um Projekte abzulegen, Bearbeiter mit verschiedenen Zugriffsrechten definieren | klar, muss sein                                                               |              | \I23-12\      | K 6.2a<br>Workflow-Organisation, Projekt-Verwaltung<br><br><b>Organisation und Verwaltung von Arbeitsprozessen</b>                                                               |
| selbst thematisiert                    | einggegebenen Text irgendwie wieder herausbekommen, z.B.                                                           | Wunsch                                                                        |              | \I23-14\      | K 6.1e<br>Export und Löschen von                                                                                                                                                 |



## I23 Extraktion

|                     |                                                              |                                                                                                      |                             |          |                                                                                                                                                                       |
|---------------------|--------------------------------------------------------------|------------------------------------------------------------------------------------------------------|-----------------------------|----------|-----------------------------------------------------------------------------------------------------------------------------------------------------------------------|
|                     | gedruckt                                                     |                                                                                                      |                             |          | Inhalten<br><br><b>Organisation und Verwaltung von Inhalten</b>                                                                                                       |
| selbst thematisiert | Frage nach der Versionenverwaltung, Urheberrechtsproblematik | sinnvoll, kann sich Umsetzung noch nicht richtig vorstellen, problematische Aspekte wie Urheberrecht | Kollaboration/Kooperationen | \I23-19\ | K 6.1a<br>Versionenverwaltung und<br>K 6.1c<br>Adressierung, Zitierbarkeit, Urheberrecht, Leistungsanerkennung<br><br><b>Organisation und Verwaltung von Inhalten</b> |
