# Supplementary material
Source: publisher site journal article supplement (https://www.degruyterbrill.com/publication/isbn/9783110463927/downloadAsset/9783110463927_Extraktionen_Reduktionen_fallbezogen.zip)
Supplement: Supplementary file 17 [file I24 Extraktion und Reduktion.pdf › fallbezogene Extraktionen und Reduktionen/I24 Extraktion und Reduktion.pdf]

|                                                            |                                                                                                                                         |                                                                   |                                               |               |                                                                                                                                                                                           |
|------------------------------------------------------------|-----------------------------------------------------------------------------------------------------------------------------------------|-------------------------------------------------------------------|-----------------------------------------------|---------------|-------------------------------------------------------------------------------------------------------------------------------------------------------------------------------------------|
| <b>TÄTIGKEITEN UND EDV-ERFAHRUNG</b>                       |                                                                                                                                         |                                                                   |                                               |               |                                                                                                                                                                                           |
| <b>Tätigkeiten</b>                                         |                                                                                                                                         |                                                                   |                                               |               |                                                                                                                                                                                           |
| <i>Gegenstände</i>                                         | <i>Methoden/Verfahren</i>                                                                                                               | <i>Ziele/Fragen</i>                                               | <i>Institutioneller Rahmen</i>                | <i>Quelle</i> |                                                                                                                                                                                           |
| Editionen, v.a. Briefwechsel, Werkedition als Folgeprojekt | "klassische Manier"                                                                                                                     | gedruckte Edition, aufgeschlossen für Hybridedition               | Universität, Forschungs- bzw. Editionsprojekt | \I24-1\       |                                                                                                                                                                                           |
| <b>Erfahrung</b>                                           |                                                                                                                                         |                                                                   |                                               |               |                                                                                                                                                                                           |
|                                                            | <i>Beschreibung</i>                                                                                                                     | <i>Bewertung</i>                                                  |                                               | <i>Quelle</i> |                                                                                                                                                                                           |
|                                                            | bisher nur mit Word gearbeitet, kein XML, kein HTML                                                                                     | habe mich nie um EDV gekümmert, komme aus der editorischen Praxis |                                               | \I24-4\       |                                                                                                                                                                                           |
|                                                            | mit Word gearbeitet, verschiedene Hilfsebenen und Datenbanken zur Auswertung angelegt, keine Versuche mit anderen Tools, nie mit TUSTEP |                                                                   |                                               | \I24-7\       |                                                                                                                                                                                           |
| <b>BEDARFSKATEGORIEN</b>                                   |                                                                                                                                         |                                                                   |                                               |               |                                                                                                                                                                                           |
| <b>K 1</b>                                                 |                                                                                                                                         |                                                                   |                                               |               |                                                                                                                                                                                           |
| <b>Bedienbarkeit</b>                                       |                                                                                                                                         |                                                                   |                                               |               |                                                                                                                                                                                           |
| <i>Benennung</i>                                           | <i>Beschreibung</i>                                                                                                                     | <i>Bewertung</i>                                                  | <i>Bezug</i>                                  | <i>Quelle</i> | <i>Reduktion</i>                                                                                                                                                                          |
| selbst thematisiert                                        | Heranführungsweise im Workshop, nichts wurde vorausgesetzt, Schritt für Schritt                                                         | sehr angenehm, positiv                                            |                                               | \I24-4\       | K 1.1g<br>Schulungen für technisch weniger versierte Nutzer, Schritt-für-Schritt-Anleitung, Heranführen/Einbinden der Community, didaktischer Prozess, Mehrwerte vermitteln, Testprojekte |



## I24 Extraktion

|                     |                                                                                                                                                                                             |                                                                 |                                                       |          |                                                                                                                                                                                                                 |
|---------------------|---------------------------------------------------------------------------------------------------------------------------------------------------------------------------------------------|-----------------------------------------------------------------|-------------------------------------------------------|----------|-----------------------------------------------------------------------------------------------------------------------------------------------------------------------------------------------------------------|
|                     |                                                                                                                                                                                             |                                                                 |                                                       |          | <b>Benutzerführung /<br/>Erlernbarkeit</b>                                                                                                                                                                      |
| selbst thematisiert | brauche eine leicht<br>benutzbare Oberfläche,<br>die mir nicht abverlangt,<br>mich um den Aufbau<br>des Ganzen zu<br>kümmern, wie in Word                                                   | brauche ich,<br>notwendig                                       | Produktion/Manipulation                               | \I24-4\  | K 1.4b<br>Arbeiten wie in der<br>„normalen“<br>Textverarbeitung<br>ermöglichen, Vermeidung<br>von spitzen Klammern,<br>XML-Generierung im<br>Hintergrund<br><br><b>Bedienbarkeit der<br/>Auszeichnungsebene</b> |
| selbst thematisiert | Hilfe durch Betreuung<br>war sehr präsent                                                                                                                                                   | Lob, Bedienbarkeit<br>wegen Hilfepräsenz<br>nicht zu beurteilen | Produktion/Manipulation                               | \I24-5\  | K 1.1h<br>schwer zu beurteilen, weil<br>im Workshop geführt<br>bzw. nur an einem Bsp.<br>gearbeitet wurde, zu<br>wenig Zeit war, Tool<br>nicht fertig war<br><br><b>Benutzerführung /<br/>Erlernbarkeit</b>     |
| selbst thematisiert | leicht erlernbare<br>Benutzeroberfläche,<br>keine Sprache mit vielen<br>Codierungen lernen wie<br>XML oder TUSTEP, auf<br>Probleme des Textes<br>konzentrieren,<br>nachträglich in TextGrid | größtes Problem                                                 | Produktion/Manipulation,<br>Modularität/Anpassbarkeit | \I24-14\ | K 1.4b<br>Arbeiten wie in der<br>„normalen“<br>Textverarbeitung<br>ermöglichen, Vermeidung<br>von spitzen Klammern,<br>XML-Generierung im<br>Hintergrund                                                        |



|                                  |                                                                                                                                                                                                                  |                                                                          |                         |               |                                                                                                                                                                                                                                                                                                         |
|----------------------------------|------------------------------------------------------------------------------------------------------------------------------------------------------------------------------------------------------------------|--------------------------------------------------------------------------|-------------------------|---------------|---------------------------------------------------------------------------------------------------------------------------------------------------------------------------------------------------------------------------------------------------------------------------------------------------------|
|                                  | importieren                                                                                                                                                                                                      |                                                                          |                         |               | <b>Bedienbarkeit der Auszeichnungsebene</b>                                                                                                                                                                                                                                                             |
| <b>K 2<br/>Rezeption/Zugriff</b> |                                                                                                                                                                                                                  |                                                                          |                         |               |                                                                                                                                                                                                                                                                                                         |
| <i>Benennung</i>                 | <i>Beschreibung</i>                                                                                                                                                                                              | <i>Bewertung</i>                                                         | <i>Bezug</i>            | <i>Quelle</i> | <i>Reduktion</i>                                                                                                                                                                                                                                                                                        |
| selbst thematisiert              | Linkfolge, über die der Benutzer direkt in die Quellen hinein geführt wird, soweit er gehen will im Kommentar, an neuralgischen Stellen Textkritik in einem Fenster, wenn man mit dem Curser über den Text fährt | Hauptnutzen im Kommentar, Textkritik per Curser ausgesprochen animierend | Produktion/Manipulation | \I24-3\       | K 2.2a<br>Spezifizierbarkeit des Zugriffs, fachspezifische Zugriffsmöglichkeiten, verschiedene Zugriffsperspektiven durch Auszeichnungen und Präsentationsformen (z.B. parallele Ansicht von Faksimile und Transkription im TBLE)<br><br><b>Zugriffsformen, Rezeptions- und Recherche-möglichkeiten</b> |
| selbst thematisiert              | schnellerer Zugriff auf Informationen, z.B. Wörterbuch, Forschung sonst sehr viel mühsamer, man kann mehreres auf einmal abgleichen                                                                              | Mehrwert                                                                 | Produktion/Manipulation | \I24-11\      | K 2.1a<br>kostenloser Zugriff auf unterschiedliche Repositorien bzw. Ressourcen (z.B. Wörterbücher), Quellen und Ausgaben/ Editionen, Vergleichsmöglichkeiten mit anderen Projekten/ Quellen, orts- und                                                                                                 |



## I24 Extraktion

|                     |                                                                                                               |                            |                         |          |                                                                                                                                                                                                                                                                                 |
|---------------------|---------------------------------------------------------------------------------------------------------------|----------------------------|-------------------------|----------|---------------------------------------------------------------------------------------------------------------------------------------------------------------------------------------------------------------------------------------------------------------------------------|
|                     |                                                                                                               |                            |                         |          | rechnerunabhängiger Zugriff<br><br><b>Zugriff auf Inhalte</b>                                                                                                                                                                                                                   |
| selbst thematisiert | Zugriff auf Quellen und Wörterbücher bei der Kommentarerstellung                                              | einer der größten Vorteile | Produktion/Manipulation | \I24-12\ | K 2.1a<br>kostenloser Zugriff auf unterschiedliche Repositorien bzw. Ressourcen (z.B. Wörterbücher), Quellen und Ausgaben/ Editionen, Vergleichsmöglichkeiten mit anderen Projekten/ Quellen, orts- und rechnerunabhängiger Zugriff<br><br><b>Zugriff auf Inhalte</b>           |
| selbst thematisiert | durch Gleiten über die Textoberfläche die Handschrift sehen, Zeitersparnis bei der interpretatorischen Arbeit | sehr schöne Funktion       | Produktion/Manipulation | \I24-13\ | K 2.2a<br>Spezifizierbarkeit des Zugriffs, fachspezifische Zugriffsmöglichkeiten, verschiedene Zugriffsperspektiven durch Auszeichnungen und Präsentationsformen (z.B. parallele Ansicht von Faksimile und Transkription im TBLE)<br><br><b>Zugriffsformen, Rezeptions- und</b> |



|                                        |                                                                                                                                                                                                                                       |                                                                  |                           |               |                                                                                                                                                                                                                                                                       |
|----------------------------------------|---------------------------------------------------------------------------------------------------------------------------------------------------------------------------------------------------------------------------------------|------------------------------------------------------------------|---------------------------|---------------|-----------------------------------------------------------------------------------------------------------------------------------------------------------------------------------------------------------------------------------------------------------------------|
|                                        |                                                                                                                                                                                                                                       |                                                                  |                           |               | <b>Recherche-<br/>möglichkeiten</b>                                                                                                                                                                                                                                   |
| selbst thematisiert                    | Zugriff auf bestimmte Texte, bestimmte Handschriften an bestimmten Standorten bzw. von bestimmten Rechteinhabern problematisch, v.a. Privatarchive                                                                                    | problematisch                                                    | Kollaboration/Kooperation | \I24-15\      | K 2.1a<br>kostenloser Zugriff auf unterschiedliche Repositorien bzw. Ressourcen (z.B. Wörterbücher), Quellen und Ausgaben/ Editionen, Vergleichsmöglichkeiten mit anderen Projekten/ Quellen, orts- und rechnerunabhängiger Zugriff<br><br><b>Zugriff auf Inhalte</b> |
| <b>K 3<br/>Produktion/Manipulation</b> |                                                                                                                                                                                                                                       |                                                                  |                           |               |                                                                                                                                                                                                                                                                       |
| <i>Benennung</i>                       | <i>Beschreibung</i>                                                                                                                                                                                                                   | <i>Bewertung</i>                                                 | <i>Bezug</i>              | <i>Quelle</i> | <i>Reduktion</i>                                                                                                                                                                                                                                                      |
| selbst thematisiert                    | Text-Markup in vorgefügten Textblöcken ist für mein Arbeitsverfahren ungeeignet, ständig Kommentierungen u.a. umwerfen, keine feste Struktur, es ergibt sich aus dem Text, wie ich vorgehe, muss nachträgliche Änderungen ermöglichen | nicht flexibel genug, nicht auf meine Arbeitsweise zugeschnitten | Modularität/Anpassbarkeit | \I24-2\       | K 3.1c<br>Auszeichnungsmöglichkeiten / Informationsanreicherung zur Bearbeitung neuer Fragestellungen, tiefere Auszeichnung, spezifischere Auszeichnung je nach Forschungsinteresse (z.B. Musikwissenschaft), semantische Auszeichnung,                               |



|                                                |                                                                                                           |                  |                         |               |                                                                                                                                                                                                                                                                                                                                                |
|------------------------------------------------|-----------------------------------------------------------------------------------------------------------|------------------|-------------------------|---------------|------------------------------------------------------------------------------------------------------------------------------------------------------------------------------------------------------------------------------------------------------------------------------------------------------------------------------------------------|
|                                                |                                                                                                           |                  |                         |               | Informationsmodellierung<br><br><b>XML-Produktion</b>                                                                                                                                                                                                                                                                                          |
| selbst thematisiert                            | nachträgliches Importieren von z.B. in Word bearbeiteten Texten                                           | wäre sehr gut    | Bedienbarkeit           | \I24-14\      | K 3.1b<br>XML-Auszeichnungs- bzw. Produktionshilfe, Tools zur digitalen Herstellung und Verfügbarmachung von Texten, XML-Schemata vorgefertigt für verschiedene individuelle Bedürfnisse, Konvertierung in XML/TEI, Baseline Encoding, Streaming Editor, Unterstützung bei zunächst geringerer Auszeichnungstiefe<br><br><b>XML-Produktion</b> |
| <b>K 4</b><br><b>Modularität/Anpassbarkeit</b> |                                                                                                           |                  |                         |               |                                                                                                                                                                                                                                                                                                                                                |
| <i>Benennung</i>                               | <i>Beschreibung</i>                                                                                       | <i>Bewertung</i> | <i>Bezug</i>            | <i>Quelle</i> | <i>Reduktion</i>                                                                                                                                                                                                                                                                                                                               |
| vom Interviewer thematisiert                   | Möglichkeit der Einrichtung des Systems entsprechend der eigenen, idiosynkratischen Arbeitsweise, Auswahl | wäre sehr gut    | Produktion/Manipulation | \I24-6\       | K 4.1a<br>Anpassung der Oberflächen-Konfiguration<br><br><b>TextGrid-Oberfläche / Umgebung</b>                                                                                                                                                                                                                                                 |
| <b>K 5</b>                                     |                                                                                                           |                  |                         |               |                                                                                                                                                                                                                                                                                                                                                |



## I24 Extraktion

| <b>Kollaboration/Kooperation</b>                          |                                                                                                                                                                                                                                                                                                                           |                                                                                                                                                                                                    |                         |               |                                                                                                                                                                                                                                                                          |
|-----------------------------------------------------------|---------------------------------------------------------------------------------------------------------------------------------------------------------------------------------------------------------------------------------------------------------------------------------------------------------------------------|----------------------------------------------------------------------------------------------------------------------------------------------------------------------------------------------------|-------------------------|---------------|--------------------------------------------------------------------------------------------------------------------------------------------------------------------------------------------------------------------------------------------------------------------------|
| <i>Benennung</i>                                          | <i>Beschreibung</i>                                                                                                                                                                                                                                                                                                       | <i>Bewertung</i>                                                                                                                                                                                   | <i>Bezug</i>            | <i>Quelle</i> | <i>Reduktion</i>                                                                                                                                                                                                                                                         |
| vom Interviewer thematisiert, vom Befragten konkretisiert | Austausch von Problemen und Erkenntnissen, z.B. über schwer zugängliche Quellen, Informationspool für einen spezifischen Nutzerkreis, damit nicht jeder neu suchen muss, z.B. Lebensdaten von Personen, die in Briefen und Werken erwähnt werden, wer welche Quellen genutzt hat, Verhältnis von Auflagen zueinander usw. | sehr großes Potenzial                                                                                                                                                                              | Rezeption/Zugriff       | \I24-8\       | K 5.1a<br>Austausch von Ressourcen, Nachnutzung und<br>K 5.1b<br>Austausch von Arbeits- bzw. Forschungsergebnissen, Bereitschaft dazu und<br>K 5.1c<br>Austausch von Arbeitsmitteln (Tools, Formaten, Skripten usw.)<br><br><b>Austausch von Inhalten und Werkzeugen</b> |
| vom Interviewer thematisiert                              | Bereitschaft, digital zu publizieren, Daten zur Verfügung zu stellen                                                                                                                                                                                                                                                      | Würde ich ohne Weiteres tun, bin froh für alles, was digitalisiert vorliegt, aber es gibt viele Eigenbrötler unter den Editoren, da besteht eine gewaltige Hürde, aber auch ein Generationswechsel | Organisation/Verwaltung | \I24-9\       | K 5.1a<br>Austausch von Ressourcen, Nachnutzung und<br>K 5.1b<br>Austausch von Arbeits- bzw. Forschungsergebnissen, Bereitschaft dazu<br><br><b>Austausch von Inhalten und Werkzeugen</b>                                                                                |
| <b>K 6<br/>Organisation/Verwaltung</b>                    |                                                                                                                                                                                                                                                                                                                           |                                                                                                                                                                                                    |                         |               |                                                                                                                                                                                                                                                                          |



## I24 Extraktion

| <i>Benennung</i>    | <i>Beschreibung</i>                                                                                                                              | <i>Bewertung</i>                                                                               | <i>Bezug</i>              | <i>Quelle</i> | <i>Reduktion</i>                                                                                                                                  |
|---------------------|--------------------------------------------------------------------------------------------------------------------------------------------------|------------------------------------------------------------------------------------------------|---------------------------|---------------|---------------------------------------------------------------------------------------------------------------------------------------------------|
| selbst thematisiert | die Angst, dass jemand ein mühsam erarbeitetes Forschungsergebnis für sich verwendet, muss man in den Griff kriegen, auszeichnen, was wem gehört | Wichtiges Problem, keine Lösungsidee, mir wäre es egal, wenn jemand meine Ergebnisse verwendet | Kollaboration/Kooperation | \I24-10\      | K 6.1c<br>Adressierung,<br>Zitierbarkeit,<br>Urheberrecht,<br>Leistungsanerkennung<br><br><b>Organisation und<br/>Verwaltung von<br/>Inhalten</b> |
