# Supplementary material
Source: publisher site journal article supplement (https://www.degruyterbrill.com/publication/isbn/9783110463927/downloadAsset/9783110463927_Extraktionen_Reduktionen_fallbezogen.zip)
Supplement: Supplementary file 18 [file I25 Extraktion und Reduktion.pdf › fallbezogene Extraktionen und Reduktionen/I25 Extraktion und Reduktion.pdf]

| <b>TÄTIGKEITEN UND EDV-ERFAHRUNG</b>                                                                                              |                                                                                                                                                      |                                                                                                                       |                                |               |                                                                                                                            |
|-----------------------------------------------------------------------------------------------------------------------------------|------------------------------------------------------------------------------------------------------------------------------------------------------|-----------------------------------------------------------------------------------------------------------------------|--------------------------------|---------------|----------------------------------------------------------------------------------------------------------------------------|
| <b>Tätigkeiten</b>                                                                                                                |                                                                                                                                                      |                                                                                                                       |                                |               |                                                                                                                            |
| <i>Gegenstände</i>                                                                                                                | <i>Methoden/Verfahren</i>                                                                                                                            | <i>Ziele/Fragen</i>                                                                                                   | <i>Institutioneller Rahmen</i> | <i>Quelle</i> |                                                                                                                            |
| historisch-kulturwissenschaftliche Informationsverarbeitung, digitale Editionen, digitale Erschließung, Aufbau eines Studiengangs | Handschriftendigitalisierung und -katalogisierung, Codierung von Daten, Metadaten, Schemata, Metadatenformate, Betreuung und eigenes Editionsprojekt | Überführung in Datenbanken, Präsentation auf der Homepage, Aufbau eines Studiengangs                                  | Bibliothek                     | \I25-1\       |                                                                                                                            |
| <b>Erfahrung</b>                                                                                                                  |                                                                                                                                                      |                                                                                                                       |                                |               |                                                                                                                            |
|                                                                                                                                   | <i>Beschreibung</i>                                                                                                                                  | <i>Bewertung</i>                                                                                                      |                                | <i>Quelle</i> |                                                                                                                            |
|                                                                                                                                   | Handschriftendigitalisierung, Datencodierung Metadatenformate, Schemata, TEI im Besonderen                                                           | nahezu 100% im Bereich eHumanities tätig, extrem viel tätig in dem Bereich, lehrt "EDV-Kenntnisse" --> Erfahrung groß |                                | \I25-1\       |                                                                                                                            |
| <b>BEDARFSKATEGORIEN</b>                                                                                                          |                                                                                                                                                      |                                                                                                                       |                                |               |                                                                                                                            |
| <b>K 1 Bedienbarkeit</b>                                                                                                          |                                                                                                                                                      |                                                                                                                       |                                |               |                                                                                                                            |
| <i>Benennung</i>                                                                                                                  | <i>Beschreibung</i>                                                                                                                                  | <i>Bewertung</i>                                                                                                      | <i>Bezug</i>                   | <i>Quelle</i> | <i>Reduktion</i>                                                                                                           |
| selbst thematisiert                                                                                                               | versierte Nutzer bringen das Lab schnell an seine Grenzen, Fehlermeldungen, offene Enden, weniger Funktionalität als erwartet                        | problematisch, selbst vielleicht irgendwann mit ausgedehnter Funktionalität nutzen                                    | Produktion/Manipulation        | \I25-3\       | K 1.3b<br>zu instabil, zu viele Programmierfehler, noch nicht einsetzbar<br><br><b>Systemstabilität, Programmierfehler</b> |
| selbst thematisiert                                                                                                               | Programmierfehler einerseits, andererseits aber auch lose Enden durch den Versuch, den Nutzer von der Kenntnis von XML/TEI zu entlasten,wo           | problematisch                                                                                                         | Produktion/Manipulation        | \I25-4\       | K 1.4a<br>XML/TEI ist eine Hürde, Unterstützung durch das System ist notwendig, Heranführen / Hilfemenu,                   |

## I25 Extraktion

|                                                           |                                                                                                                                                                                                              |                                           |                         |               |                                                                                                                                                                                                                                                                       |
|-----------------------------------------------------------|--------------------------------------------------------------------------------------------------------------------------------------------------------------------------------------------------------------|-------------------------------------------|-------------------------|---------------|-----------------------------------------------------------------------------------------------------------------------------------------------------------------------------------------------------------------------------------------------------------------------|
|                                                           | XML problematisch ist, z.B. bei überlappenden Strukturen/Verschachtelungen, muss man in die spitzen Klammern wird dem komplexen Gegenstand digitale Edition nicht gerecht, Probleme werden eher verschleiert |                                           |                         |               | Reduzierung der Schwelle, aber keine Vermeidung von spitzen Klammern, Komplexität abbilden, fachliche Mehrwerte vermitteln<br><br><b>Bedienbarkeit der Auszeichnungsebene</b>                                                                                         |
| <b>K 2<br/>Rezeption/Zugriff</b>                          |                                                                                                                                                                                                              |                                           |                         |               |                                                                                                                                                                                                                                                                       |
| <i>Benennung</i>                                          | <i>Beschreibung</i>                                                                                                                                                                                          | <i>Bewertung</i>                          | <i>Bezug</i>            | <i>Quelle</i> | <i>Reduktion</i>                                                                                                                                                                                                                                                      |
| vom Interviewer thematisiert, vom Befragten konkretisiert | Ressourcenzugriff der Forschungsöffentlichkeit ermöglichen, Recherche-Einstieg, Ressourcen wie Bilder, Volltext, Metainformationen, Katalogeinträge, usw.                                                    | Hauptaufgabe von solchen Angeboten wie TG |                         | \I25-7\       | K 2.1a<br>kostenloser Zugriff auf unterschiedliche Repositorien bzw. Ressourcen (z.B. Wörterbücher), Quellen und Ausgaben/ Editionen, Vergleichsmöglichkeiten mit anderen Projekten/ Quellen, orts- und rechnerunabhängiger Zugriff<br><br><b>Zugriff auf Inhalte</b> |
| selbst thematisiert                                       | Zugriff auf den Quellcode entscheidend für die Nachnutzbarkeit                                                                                                                                               | entscheidender Aspekt                     | Produktion/Manipulation | \I25-10\      | K 2.1c<br>nicht rein rezeptiver, sondern auch produktiver, „schreibender“ Zugriff, auch in der eigenen Forschungsumgebung,                                                                                                                                            |

## I25 Extraktion

|                                                           |                                                                                                                                                                                                           |                                               |                         |          |                                                                                                                                                                                                                                                                       |
|-----------------------------------------------------------|-----------------------------------------------------------------------------------------------------------------------------------------------------------------------------------------------------------|-----------------------------------------------|-------------------------|----------|-----------------------------------------------------------------------------------------------------------------------------------------------------------------------------------------------------------------------------------------------------------------------|
|                                                           |                                                                                                                                                                                                           |                                               |                         |          | auch auf den Quellcode<br><b>Zugriff auf Inhalte</b>                                                                                                                                                                                                                  |
| vom Interviewer thematisiert, vom Befragten konkretisiert | Organisation des Inthaltezugriffs und der Auffindbarkeit von Ressourcen über Portale oder Suchmaschinen oder Abfrage von OAI-Schnittstellen letztlich von der Identifizierbarkeit der Ressourcen abhängig | Identifizierbarkeit als entscheidender Aspekt | Organisation/Verwaltung | \I25-10\ | K 2.2b<br>Leichte Zugänglichkeit, Übersicht durch Browser, Suchmasken, Ontologien, Klassifizierungen, Indizierungen, Strukturierungen<br><br><b>Zugriffsformen, Rezeptions- und Recherche-möglichkeiten</b>                                                           |
| selbst thematisiert                                       | Digitalisierung unter dem Aspekt, dass Dinge zur Verfügung gestellt werden, Zugriff auf Objekte erleichtern, auch für weit entfernte Forscher                                                             | ein entscheidender Grund für Digitalisierung  |                         | \I25-11\ | K 2.1a<br>kostenloser Zugriff auf unterschiedliche Repositorien bzw. Ressourcen (z.B. Wörterbücher), Quellen und Ausgaben/ Editionen, Vergleichsmöglichkeiten mit anderen Projekten/ Quellen, orts- und rechnerunabhängiger Zugriff<br><br><b>Zugriff auf Inhalte</b> |
| selbst thematisiert                                       | Bewusstsein erzeugen für Klassifizierung von                                                                                                                                                              | größtes Potenzial von TG                      | RezeptionZugriff        | \I25-14\ | K 2.2b<br>Leichte Zugänglichkeit,                                                                                                                                                                                                                                     |

## I25 Extraktion

|                                        |                                                        |                                         |                           |               |                                                                                                                                                                                                                                                                                                                                                |
|----------------------------------------|--------------------------------------------------------|-----------------------------------------|---------------------------|---------------|------------------------------------------------------------------------------------------------------------------------------------------------------------------------------------------------------------------------------------------------------------------------------------------------------------------------------------------------|
|                                        | Informationsarten, Identifizierbarkeit ermöglichen     |                                         |                           |               | Übersicht durch Browser, Suchmasken, Ontologien, Klassifizierungen, Indizierungen, Strukturierungen<br><br><b>Zugriffsformen, Rezeptions- und Recherche-möglichkeiten</b>                                                                                                                                                                      |
| <b>K 3<br/>Produktion/Manipulation</b> |                                                        |                                         |                           |               |                                                                                                                                                                                                                                                                                                                                                |
| <i>Benennung</i>                       | <i>Beschreibung</i>                                    | <i>Bewertung</i>                        | <i>Bezug</i>              | <i>Quelle</i> | <i>Reduktion</i>                                                                                                                                                                                                                                                                                                                               |
| selbst thematisiert                    | XML-Editoren, digitale Editionen                       | erwartete Funktionen                    |                           | \I25-2\       | K 3.1b<br>XML-Auszeichnungs- bzw. Produktionshilfe, Tools zur digitalen Herstellung und Verfügbarmachung von Texten, XML-Schemata vorgefertigt für verschiedene individuelle Bedürfnisse, Konvertierung in XML/TEI, Baseline Encoding, Streaming Editor, Unterstützung bei zunächst geringerer Auszeichnungstiefe<br><br><b>XML-Produktion</b> |
| selbst thematisiert                    | Schutz von Dokumenten, die in Bearbeitung sind, Fragen | noch nicht ganz realisiert, noch offen, | Kollaboration/Kooperation | \I25-5\       | K 3.3a<br>Verknüpfungs-                                                                                                                                                                                                                                                                                                                        |

## I25 Extraktion

|                                                           |                                                                                                                                                               |                                           |                   |          |                                                                                                                                                                                                                                                                   |
|-----------------------------------------------------------|---------------------------------------------------------------------------------------------------------------------------------------------------------------|-------------------------------------------|-------------------|----------|-------------------------------------------------------------------------------------------------------------------------------------------------------------------------------------------------------------------------------------------------------------------|
|                                                           | des verteilten Zugriffs auf Dokumente, Möglichkeit der Nachnutzung, nicht nur Speicherort, andere Ressourcen - z.B. von Bibliotheken - verlinken, verknüpfen  | noch in der Beta- oder gar Alphaphase     |                   |          | <p>möglichkeiten Text-Text (z.B. editionswiss. Kommentarfunktionen, Varianten verknüpfen, Apparat, Quellen/Referenzen, Register, Wörterbücher, Briefe)</p> <p><b>Verknüpfungsmöglichkeiten und deren Visualisierung</b></p>                                       |
| vom Interviewer thematisiert, vom Befragten konkretisiert | Zugriff auf Tools                                                                                                                                             | Hauptaufgabe von solchen Angeboten wie TG |                   | \I25-7\  | <p>K 3.4a<br/>Arbeitsumgebung mit Tool-Angebot, nicht alles neu /selbst programmieren, kostenlos</p> <p><b>Produktionsunterstützung allgemein</b></p>                                                                                                             |
| selbst thematisiert                                       | maschinelle Auswertbarkeit, neue Fragestellungen untersuchen, statistische Kennzahlen über die Verteilung von Text auf einer Seite z.B., Erkennung von Händen | entscheidender Mehrwert                   | Rezeption/Zugriff | \I25-11\ | <p>K 3.2b<br/>Unterschiede durch Textvergleich (Kollationierung, TBLE) visualisieren, Schreiberhände vergleichen, Textgenese, Entwicklungsprozess rekonstruieren und darstellen, Schichten und Räumlichkeit darstellen, multiperspektivischen Zugang schaffen</p> |

## I25 Extraktion

|                                                           |                                                                                                                                                                                        |                                             |                         |          |                                                                                                                                                                                                                                                                                                                   |
|-----------------------------------------------------------|----------------------------------------------------------------------------------------------------------------------------------------------------------------------------------------|---------------------------------------------|-------------------------|----------|-------------------------------------------------------------------------------------------------------------------------------------------------------------------------------------------------------------------------------------------------------------------------------------------------------------------|
|                                                           |                                                                                                                                                                                        |                                             |                         |          | <b>Analyse- und Visualisierungsmöglichkeiten</b>                                                                                                                                                                                                                                                                  |
| vom Interviewer thematisiert, vom Befragten konkretisiert | Erkennung von Händen, OCR-Software auf einen Font trainierbar machen - und umgekehrt unterschiedliche Fonts erkennen, untersuchen, Stilgeschichte der Drucklettern im frühen Buchdruck | neue Forschungsmöglichkeiten bzw. Mehrwerte |                         | \I25-12\ | K 3.2b<br>Unterschiede durch Textvergleich (Kollationierung, TBLE) visualisieren, Schreiberhände vergleichen, Textgenese, Entwicklungsprozess rekonstruieren und darstellen, Schichten und Räumlichkeit darstellen, multiperspektivischen Zugang schaffen<br><br><b>Analyse- und Visualisierungsmöglichkeiten</b> |
| selbst thematisiert                                       | Tools zur Verfügung stellen                                                                                                                                                            | eines der wichtigsten Potenziale von TG     | Organisation/Verwaltung | \I25-14\ | K 3.4a<br>Arbeitsumgebung mit Tool-Angebot, nicht alles neu /selbst programmieren, kostenlos<br><br><b>Produktionsunterstützung allgemein</b>                                                                                                                                                                     |

|                                                           |                                                                                                                                                                                                                     |                                                                               |                                            |               |                                                                                                                                                                                          |
|-----------------------------------------------------------|---------------------------------------------------------------------------------------------------------------------------------------------------------------------------------------------------------------------|-------------------------------------------------------------------------------|--------------------------------------------|---------------|------------------------------------------------------------------------------------------------------------------------------------------------------------------------------------------|
|                                                           |                                                                                                                                                                                                                     |                                                                               |                                            |               |                                                                                                                                                                                          |
| <b>K 4</b><br><b>Modularität/<br/>Anpassbarkeit</b>       |                                                                                                                                                                                                                     |                                                                               |                                            |               |                                                                                                                                                                                          |
| <i>Benennung</i>                                          | <i>Beschreibung</i>                                                                                                                                                                                                 | <i>Bewertung</i>                                                              | <i>Bezug</i>                               | <i>Quelle</i> | <i>Reduktion</i>                                                                                                                                                                         |
| ...                                                       | ...                                                                                                                                                                                                                 | ...                                                                           | ...                                        | ...           | ...                                                                                                                                                                                      |
| <b>K 5</b><br><b>Kollaboration/Kooperation</b>            |                                                                                                                                                                                                                     |                                                                               |                                            |               |                                                                                                                                                                                          |
| <i>Benennung</i>                                          | <i>Beschreibung</i>                                                                                                                                                                                                 | <i>Bewertung</i>                                                              | <i>Bezug</i>                               | <i>Quelle</i> | <i>Reduktion</i>                                                                                                                                                                         |
| selbst thematisiert                                       | Daten akkumulieren und dezentral bearbeiten                                                                                                                                                                         | erwartete Funktion                                                            | Organisation/Verwaltung                    | \I25-2\       | K 5.2a<br>Zusammenarbeit in Teams von verschiedenen Orten aus, auch an einem Dokument, verteilte Bearbeitung verschiedener ‚Schichten‘ eines Dokuments usw.<br><br><b>Zusammenarbeit</b> |
| selbst thematisiert                                       | Schutz von Dokumenten, die in Bearbeitung sind, Fragen des verteilten Zugriffs auf Dokumente, Möglichkeit der Nachnutzung, nicht nur Speicherort, andere Ressourcen - z.B. von Bibliotheken - verlinken, verknüpfen | noch nicht ganz realisiert, noch offen, noch in der Beta- oder gar Alphaphase | Produktion/Manipulation                    | \I25-5\       | K 5.2a<br>Zusammenarbeit in Teams von verschiedenen Orten aus, auch an einem Dokument, verteilte Bearbeitung verschiedener ‚Schichten‘ eines Dokuments usw.<br><br><b>Zusammenarbeit</b> |
| vom Interviewer thematisiert, vom Befragten konkretisiert | Standards wie TEI Dublincore als Voraussetzung für Datenaustausch                                                                                                                                                   | Wird künftig eine wichtige Rolle spielen                                      | Organisation/Verwaltung, Rezeption/Zugriff | \I25-6\       | K 5.1d<br>Standards, TEI, Unabhängigkeit von Datenformaten                                                                                                                               |

## I25 Extraktion

|                                                           |                                                                                                                                                                                                                                                    |                                          |                                            |         |                                                                                                                                                                                                                                                                                                                                                                                         |
|-----------------------------------------------------------|----------------------------------------------------------------------------------------------------------------------------------------------------------------------------------------------------------------------------------------------------|------------------------------------------|--------------------------------------------|---------|-----------------------------------------------------------------------------------------------------------------------------------------------------------------------------------------------------------------------------------------------------------------------------------------------------------------------------------------------------------------------------------------|
|                                                           |                                                                                                                                                                                                                                                    |                                          |                                            |         | <b>Austausch von Inhalten und Werkzeugen</b>                                                                                                                                                                                                                                                                                                                                            |
| vom Interviewer thematisiert, vom Befragten konkretisiert | Open Access, Datenaustausch über OAI-Schnittstellen organisieren, wechselseitige Anreicherung der Inhalte, Systematik der Kommunikation zwischen lokalen Anbietern und Akkumulatoren bzw. Harvestern wie TG/Grid in Gang bringen und stabilisieren | wird künftig eine wichtige Rolle spielen | Rezeption/Zugriff, Organisation/Verwaltung | \I25-6\ | <p>K 5.1a<br/>Austausch von Ressourcen, Nachnutzung und</p> <p>K 5.1b<br/>Austausch von Arbeits- bzw. Forschungsergebnissen, Bereitschaft dazu</p> <p><b>Austausch von Inhalten und Werkzeugen</b></p> <p>und</p> <p>K 5.2b<br/>Zusammenarbeit zwischen Institutionen, Projekten, auch intern zwischen verschiedenen Stellen, mit Technikern, Workflow</p> <p><b>Zusammenarbeit</b></p> |
| vom Interviewer thematisiert, vom Befragten konkretisiert | vernetzte Struktur, die Ressourcen zusammenbringt, verteilte Ressourcen aufbaut, Ressourcen von Bibliotheken, Universitäten, Forschungsinstitutionen                                                                                               | erwartete Funktion von TG                | Rezeption/Zugriff, Organisation/Verwaltung | \I25-7\ | <p>K 5.1a<br/>Austausch von Ressourcen, Nachnutzung und</p> <p>K 5.1b<br/>Austausch von Arbeits-</p>                                                                                                                                                                                                                                                                                    |



## I25 Extraktion

|                                                           |                                                                                                                                                                                                                                                          |                                      |                                                  |          |                                                                                                                                                                                                                                                                                   |
|-----------------------------------------------------------|----------------------------------------------------------------------------------------------------------------------------------------------------------------------------------------------------------------------------------------------------------|--------------------------------------|--------------------------------------------------|----------|-----------------------------------------------------------------------------------------------------------------------------------------------------------------------------------------------------------------------------------------------------------------------------------|
|                                                           | verknüpfen und der Forschungsöffentlichkeit zur Verfügung stellen, Tools und Oberflächenmechanismen organisieren, Aufbau auf bestehenden Daten ermöglichen                                                                                               |                                      |                                                  |          | bzw. Forschungsergebnissen, Bereitschaft dazu<br><br><b>Austausch von Inhalten und Werkzeugen</b><br><br>und<br><br>K 5.2b<br>Zusammenarbeit zwischen Institutionen, Projekten, auch intern zwischen verschiedenen Stellen, mit Technikern, Workflow<br><br><b>Zusammenarbeit</b> |
| vom Interviewer thematisiert, vom Befragten konkretisiert | Kollaboration z.B. bei sehr breit überlieferten Texten, die von verschiedenen Forschern – evtl. aufeinander aufbauend – bearbeitet werden können, offene Edition, Gewinnung neuer Erkenntnisse über die Überlieferungsgeschichte, dynamische Erweiterung | mögliche Mehrwerte für die Forschung | Produktion/Manipulation, Organisation/Verwaltung | \I25-8\  | K 5.2a<br>Zusammenarbeit in Teams von verschiedenen Orten aus, auch an einem Dokument, verteilte Bearbeitung verschiedener ‚Schichten‘ eines Dokuments usw.<br><br><b>Zusammenarbeit</b>                                                                                          |
| selbst thematisiert                                       | Eigenwilligkeit der Forscher und Komplexität der Forschung                                                                                                                                                                                               | problematisch                        |                                                  | \I25-14\ | K 5.1d<br>Standards, TEI, Unabhängigkeit von Datenformaten                                                                                                                                                                                                                        |

|                                                           |                                                                                                                                                                            |                                                                                        |                            |               |                                                                                                                                                                                                                                                                   |
|-----------------------------------------------------------|----------------------------------------------------------------------------------------------------------------------------------------------------------------------------|----------------------------------------------------------------------------------------|----------------------------|---------------|-------------------------------------------------------------------------------------------------------------------------------------------------------------------------------------------------------------------------------------------------------------------|
|                                                           |                                                                                                                                                                            |                                                                                        |                            |               | <b>Austausch von Inhalten und Werkzeugen</b>                                                                                                                                                                                                                      |
| <b>K 6<br/>Organisation/Verwaltung</b>                    |                                                                                                                                                                            |                                                                                        |                            |               |                                                                                                                                                                                                                                                                   |
| <i>Benennung</i>                                          | <i>Beschreibung</i>                                                                                                                                                        | <i>Bewertung</i>                                                                       | <i>Bezug</i>               | <i>Quelle</i> | <i>Reduktion</i>                                                                                                                                                                                                                                                  |
| vom Interviewer thematisiert, vom Befragten konkretisiert | Systematik der Kommunikation zwischen lokalen Anbietern und Akkumulatoren bzw. Harvestern wie TG/Grid in Gang bringen und stabilisieren, Langzeitsicherheit, Zitierbarkeit | wird künftig eine wichtige Rolle spielen                                               | Kollaboration/Kooperation  | \I25-6\       | K 6.1b<br>Datenspeicherung und –verwaltung, Langzeitarchivierung, verbunden mit Bearbeitungsmöglichkeiten und Nachnutzung und<br>K 6.1c<br>Adressierung, Zitierbarkeit, Urheberrecht, Leistungsanerkennung<br><br><b>Organisation und Verwaltung von Inhalten</b> |
| selbst thematisiert                                       | Honorierung wissenschaftlicher Leistung in offenen Editionen                                                                                                               | problematisch, könnte mir vorstellen, dass das eine Möglichkeit für die Forschung wird | Kollaboration/Kooperation, | \I25-8\       | K 6.1c<br>Adressierung, Zitierbarkeit, Urheberrecht, Leistungsanerkennung<br><br><b>Organisation und Verwaltung von Inhalten</b>                                                                                                                                  |

## I25 Extraktion

|                                                           |                                                                                                                                                                                                                                                                                                                                                     |                                                                                                                                     |                                                    |          |                                                                                                                                                   |
|-----------------------------------------------------------|-----------------------------------------------------------------------------------------------------------------------------------------------------------------------------------------------------------------------------------------------------------------------------------------------------------------------------------------------------|-------------------------------------------------------------------------------------------------------------------------------------|----------------------------------------------------|----------|---------------------------------------------------------------------------------------------------------------------------------------------------|
| vom Interviewer thematisiert, vom Befragten konkretisiert | objektbezogene Ordnerstrukturen - alles, was zu einer Handschrift gehört, in einem Ordner - mit einer Signatur, Verortung im Internet z.B. in einer Institution wie einer digitalen Bibliothek, eindeutige Identifizierung, nicht einfach Datenbank mit ID=5743... - Ressource sprechend machen, Automatisierung des Recherche-Zugriffs auf Portale | Wichtig für jeden, der im Internet publiziert, jeder ist potenziell Ressourcenanbieter                                              | Rezeption/Zugriff                                  | \I25-9\  | K 6.1c<br>Adressierung,<br>Zitierbarkeit,<br>Urheberrecht,<br>Leistungsanerkennung<br><br><b>Organisation und<br/>Verwaltung von<br/>Inhalten</b> |
| vom Interviewer thematisiert, vom Befragten konkretisiert | Versionierung und Zugangskontrolle bzw. -sperrung, Zugriff auf das selbe Dokument von verschiedenen Forschern aus verschiedenen Forschungsperspektiven, Auflösung von Versionskonflikten                                                                                                                                                            | Lösungsmöglichkeiten stehen schon zur Verfügung, müssen nur implementiert werden, sinnvoll und nötig, aber auch schon Gang und Gäbe | Produktion/Manipulation, Kollaboration/Kooperation | \I25-13\ | K 6.1a<br>Versionenverwaltung<br><br><b>Organisation und<br/>Verwaltung von<br/>Inhalten</b>                                                      |
