# Supplementary material
Source: publisher site journal article supplement (https://www.degruyterbrill.com/publication/isbn/9783110463927/downloadAsset/9783110463927_Extraktionen_Reduktionen_fallbezogen.zip)
Supplement: Supplementary file 19 [file I26 Extraktion und Reduktion.pdf › fallbezogene Extraktionen und Reduktionen/I26 Extraktion und Reduktion.pdf]

| <b>TÄTIGKEITEN UND EDV-ERFAHRUNG</b>                      |                                                                                                                      |                                                                                                                                                                                      |                                |               |                                                                                      |
|-----------------------------------------------------------|----------------------------------------------------------------------------------------------------------------------|--------------------------------------------------------------------------------------------------------------------------------------------------------------------------------------|--------------------------------|---------------|--------------------------------------------------------------------------------------|
| <b>Tätigkeiten</b>                                        |                                                                                                                      |                                                                                                                                                                                      |                                |               |                                                                                      |
| <i>Gegenstände</i>                                        | <i>Methoden/Verfahren</i>                                                                                            | <i>Ziele/Fragen</i>                                                                                                                                                                  | <i>Institutioneller Rahmen</i> | <i>Quelle</i> |                                                                                      |
| Software für digitale Editionen                           | Beratung und Software-Entwicklung                                                                                    | Problemlösungen im Bereich digitale Editionen                                                                                                                                        | Akademie                       | \I26-1\       |                                                                                      |
| <b>Erfahrung</b>                                          |                                                                                                                      |                                                                                                                                                                                      |                                |               |                                                                                      |
|                                                           | <i>Beschreibung</i>                                                                                                  | <i>Bewertung</i>                                                                                                                                                                     |                                | <i>Quelle</i> |                                                                                      |
|                                                           | Germanistik-, Philosophie- und Informatikstudium, Softwareentwicklung, auch Tätigkeit an medizinischen Institutionen | hohe EDV-Erfahrung - auch speziell im Bereich digitale Editionen                                                                                                                     |                                | \I26-1\       |                                                                                      |
| <b>BEDARFSKATEGORIEN</b>                                  |                                                                                                                      |                                                                                                                                                                                      |                                |               |                                                                                      |
| <b>K 1 Bedienbarkeit</b>                                  |                                                                                                                      |                                                                                                                                                                                      |                                |               |                                                                                      |
| <i>Benennung</i>                                          | <i>Beschreibung</i>                                                                                                  | <i>Bewertung</i>                                                                                                                                                                     | <i>Bezug</i>                   | <i>Quelle</i> | <i>Reduktion</i>                                                                     |
| vom Interviewer thematisiert, vom Befragten konkretisiert | Benutzerfreundlichkeit                                                                                               | sehr gut - Fortschritt, gerade wenn man traditionelle Editionswerkzeuge gewohnt ist, an einzelnen Stellen hakte es noch etwas, kann aber auch an meiner Unerfahrenheit gelegen haben | Produktion/Manipulation        | \I26-5\       | K 1.1i<br>unproblematisch, Übungssache<br><br><b>Benutzerführung / Erlernbarkeit</b> |
| selbst thematisiert                                       | Erprobungsphase zur Etablierung des Tools einbauen, realitätsnah in Probeprojekten                                   | Möglichkeit der Problematik zu begegnen                                                                                                                                              | Kollaboration/Kooperation      | \I26-13\      | K 1.1g<br>Schulungen für technisch weniger versierte Nutzer, Schritt-für-Schritt-    |

## I26 Extraktion

|                                                           |                                                                                                                                                                                                                                                                                        |                             |               |               |                                                                                                                                                                                                             |
|-----------------------------------------------------------|----------------------------------------------------------------------------------------------------------------------------------------------------------------------------------------------------------------------------------------------------------------------------------------|-----------------------------|---------------|---------------|-------------------------------------------------------------------------------------------------------------------------------------------------------------------------------------------------------------|
|                                                           | einsetzen, um der Tendenz zu etablierten Tools zu begegnen, Community-Building                                                                                                                                                                                                         |                             |               |               | Anleitung, Heranführen/Einbinden der Community, didaktischer Prozess, Mehrwerte vermitteln, Testprojekte<br><br><b>Benutzerführung / Erlernbarkeit</b>                                                      |
| selbst thematisiert                                       | leicht handhabbares Tool im Editionsbereich                                                                                                                                                                                                                                            | Wäre ein großer Fortschritt |               | \I26-15\      | K 1.1b<br>gute Benutzbarkeit wäre wichtig<br><br><b>Benutzerführung / Erlernbarkeit</b>                                                                                                                     |
| <b>K 2<br/>Rezeption/Zugriff</b>                          |                                                                                                                                                                                                                                                                                        |                             |               |               |                                                                                                                                                                                                             |
| <i>Benennung</i>                                          | <i>Beschreibung</i>                                                                                                                                                                                                                                                                    | <i>Bewertung</i>            | <i>Bezug</i>  | <i>Quelle</i> | <i>Reduktion</i>                                                                                                                                                                                            |
| vom Interviewer thematisiert, vom Befragten konkretisiert | Hypertext-Editionen, die auch wirklich mit dem Buch konkurrieren können ohne die Beschränkungen des gedruckten Mediums, Hypertext-Möglichkeiten nutzen: nicht nur Ausschnitte von einem Server auf dem Bildschirm betrachten, freie Verschiebbarkeit, Verwendung auf unterschiedlichen | ganz wichtige Voraussetzung | Bedienbarkeit | \I26-16\      | K 2.2b<br>Leichte Zugänglichkeit, Übersicht durch Browser, Suchmasken, Ontologien, Klassifizierungen, Indizierungen, Strukturierungen<br><br><b>Zugriffsformen, Rezeptions- und Recherche-möglichkeiten</b> |

## I26 Extraktion

|                                              |                                                                                                           |                                                                                            |                         |               |                                                                                                                                                                                                                                                                                                                                                                                                                                                                                     |
|----------------------------------------------|-----------------------------------------------------------------------------------------------------------|--------------------------------------------------------------------------------------------|-------------------------|---------------|-------------------------------------------------------------------------------------------------------------------------------------------------------------------------------------------------------------------------------------------------------------------------------------------------------------------------------------------------------------------------------------------------------------------------------------------------------------------------------------|
|                                              | Ausgabemedien,<br>benutzerfreundliche<br>Form                                                             |                                                                                            |                         |               |                                                                                                                                                                                                                                                                                                                                                                                                                                                                                     |
| selbst thematisiert                          | Vannevar Bushs Vision<br>von einer<br>Arbeitsumgebung                                                     | neue Möglichkeiten<br>für<br>Hypertexteditionen                                            | Produktion/Manipulation | \I26-17\      | K 2.1a<br>kostenloser Zugriff auf<br>unterschiedliche<br>Repositorien bzw.<br>Ressourcen (z.B.<br>Wörterbücher), Quellen<br>und Ausgaben/ Editionen,<br>Vergleichs-<br>möglichkeiten mit<br>anderen Projekten/<br>Quellen, orts- und<br>rechnerunabhängiger<br>Zugriff<br>und<br>K 2.1c<br>nicht rein rezeptiver,<br>sondern auch produktiver,<br>„schreibender“ Zugriff,<br>auch in der eigenen<br>Forschungsumgebung,<br>auch auf den Quellcode<br><br><b>Zugriff auf Inhalte</b> |
| <b>K 3</b><br><b>Produktion/Manipulation</b> |                                                                                                           |                                                                                            |                         |               |                                                                                                                                                                                                                                                                                                                                                                                                                                                                                     |
| <i>Benennung</i>                             | <i>Beschreibung</i>                                                                                       | <i>Bewertung</i>                                                                           | <i>Bezug</i>            | <i>Quelle</i> | <i>Reduktion</i>                                                                                                                                                                                                                                                                                                                                                                                                                                                                    |
| selbst thematisiert                          | Konzept und Umfang<br>des Werkzeugs,<br>Akzeptanz von neuen<br>Tools im Bereich Edition<br>mit Tendenz zu | Neuerung zu<br>TUSTEP wird<br>benötigt, TextGrid<br>bietet das vom<br>Umfang her, hat aber |                         | \I26-2\       | K 3.4a<br>Arbeitsumgebung mit<br>Tool-Angebot, nicht alles<br>neu /selbst<br>programmieren, kostenlos                                                                                                                                                                                                                                                                                                                                                                               |

## I26 Extraktion

|                     |                                                                                                                                                                                               |                                                                                                 |                           |         |                                                                                                                                                                           |
|---------------------|-----------------------------------------------------------------------------------------------------------------------------------------------------------------------------------------------|-------------------------------------------------------------------------------------------------|---------------------------|---------|---------------------------------------------------------------------------------------------------------------------------------------------------------------------------|
|                     | Etabliertem, Weitverbreiteten, bis zum Schluss tragenden                                                                                                                                      | noch nicht den Reifegrad, dass es ohne Weiteres eingesetzt werden kann, Akzeptanz problematisch |                           |         | <b>Produktionsunterstützung allgemein</b>                                                                                                                                 |
| selbst thematisiert | viele Tools sind noch nicht im regelmäßigen Angebot von TextGrid eingebunden, z.B. der Kollationierer, der in der Demonstration gut funktionierte, aber nicht schon im ständigen Angebot ist, | konzipiertes, vorgestelltes Angebot reicht aus, wirklich verfügbares nicht                      |                           | \I26-3\ | K 3.4a<br>Arbeitsumgebung mit Tool-Angebot, nicht alles neu /selbst programmieren, kostenlos<br><br><b>Produktionsunterstützung allgemein</b>                             |
| selbst thematisiert | Text-Bild-Linkeditor                                                                                                                                                                          | funktioniert gut, Bedarf ist in den letzten Jahren stark geworden                               |                           | \I26-4\ | K 3.3d<br>Verknüpfungsmöglichkeiten Text-Bild, Transkriptions-/Faksimile-Ansicht<br><br><b>Verknüpfungsmöglichkeiten und deren Visualisierung</b>                         |
| selbst thematisiert | mehr Verknüpfungen möglich als traditional, Bezug auf andere Editionen, inhaltlich, gemeinsame Nutzung ausführlicher Personenregister bei gemeinsamen Bezugspersonen, Bezugsname von          | Viele gute Möglichkeiten auch für Kollaboration                                                 | Kollaboration/Kooperation | \I26-7\ | K 3.3a<br>Verknüpfungsmöglichkeiten Text-Text (z.B. editionswiss. Kommentarfunktionen, Varianten verknüpfen, Apparat, Quellen/Referenzen, Register, Wörterbücher, Briefe) |

## I26 Extraktion

|                                                                 |                                                                                                                                                                                                                                                                                                                                                                                        |                                                                                                                                                                                                                    |                   |          |                                                                                                                                                                                                                                                                                                                                     |
|-----------------------------------------------------------------|----------------------------------------------------------------------------------------------------------------------------------------------------------------------------------------------------------------------------------------------------------------------------------------------------------------------------------------------------------------------------------------|--------------------------------------------------------------------------------------------------------------------------------------------------------------------------------------------------------------------|-------------------|----------|-------------------------------------------------------------------------------------------------------------------------------------------------------------------------------------------------------------------------------------------------------------------------------------------------------------------------------------|
|                                                                 | Dichtern aufeinander                                                                                                                                                                                                                                                                                                                                                                   |                                                                                                                                                                                                                    |                   |          | <b>Verknüpfungs-<br/>möglichkeiten und<br/>deren Visualisierung</b>                                                                                                                                                                                                                                                                 |
| vom Interviewer<br>thematisiert, vom Befragten<br>konkretisiert | digital gestützt durch<br>ungeheure Textmengen<br>arbeiten, ganz andere<br>Ergebnisse realistisch,<br>Datawarehouse- und<br>Datamining-Techniken,<br>Auszeichnung und<br>Durchsuchbarkeit,<br>systematisch, Arbeit<br>reinstecken, um mehr<br>analytisch herauszuholen<br>– auch für die<br>Kommentarebene,<br>Komplexität der<br>Auszeichnung --><br>Auslagerung von<br>Informationen | neue Forschung und<br>neue Ergebnisse<br>durch DH möglich --<br>> Potenzial, Problem,<br>dass Editionstexte<br>durch komplexe<br>Auszeichnung<br>unhandhabbar<br>werden, evtl.<br>Auslagerung von<br>Informationen | Rezeption/Zugriff | \I26-11\ | K 3.1c<br>Auszeichnungs-<br>möglichkeiten /<br>Informationsanreicherung<br>zur Bearbeitung neuer<br>Fragestellungen, tiefere<br>Auszeichnung,<br>spezifischere<br>Auszeichnung je nach<br>Forschungsinteresse (z.B.<br>Musikwissenschaft),<br>semantische<br>Auszeichnung,<br>Informationsmodellierung<br><br><b>XML-Produktion</b> |
| selbst thematisiert                                             | Auszeichnungen auf<br>bedeutungstragender<br>Ebene, semantisches<br>Web, RF-Format                                                                                                                                                                                                                                                                                                     | großer Bedarf, hoher<br>Anspruch,<br>Schwierigkeit der<br>Umsetzung unklar,<br>finde ich persönlich<br>wünschenswert                                                                                               |                   | \I26-14\ | K 3.1c<br>Auszeichnungs-<br>möglichkeiten /<br>Informationsanreicherung<br>zur Bearbeitung neuer<br>Fragestellungen, tiefere<br>Auszeichnung,<br>spezifischere<br>Auszeichnung je nach<br>Forschungsinteresse (z.B.<br>Musikwissenschaft),<br>semantische<br>Auszeichnung,                                                          |

## I26 Extraktion

|                     |                                                                                                                                                                           |                                           |                         |          |                                                                                                                                                                                                                                                                                               |
|---------------------|---------------------------------------------------------------------------------------------------------------------------------------------------------------------------|-------------------------------------------|-------------------------|----------|-----------------------------------------------------------------------------------------------------------------------------------------------------------------------------------------------------------------------------------------------------------------------------------------------|
|                     |                                                                                                                                                                           |                                           |                         |          | Informationsmodellierung<br><br><b>XML-Produktion</b>                                                                                                                                                                                                                                         |
| selbst thematisiert | auf der Ebene einer inhaltlichen Struktur Editionen herausgeben bzw. die Grundlage dafür zur Verfügung stellen – nicht wie irgendeine Textverarbeitung                    | Wäre ein entscheidender Fortschritt       |                         | \I26-15\ | K 3.1c<br>Auszeichnungsmöglichkeiten / Informationsanreicherung zur Bearbeitung neuer Fragestellungen, tiefere Auszeichnung, spezifischere Auszeichnung je nach Forschungsinteresse (z.B. Musikwissenschaft), semantische Auszeichnung, Informationsmodellierung<br><br><b>XML-Produktion</b> |
| selbst thematisiert | Nelsons Vision von einer universellen Bibliothek, nicht zitieren, sondern direkt auf die Quellen verweisen im Dokuversum, Vannevar Bushs Vision von einer Arbeitsumgebung | neue Möglichkeiten für Hypertexteditionen | Produktion/Manipulation | \I26-17\ | K 3.3a<br>Verknüpfungsmöglichkeiten Text-Text (z.B. editionswiss. Kommentarfunktionen, Varianten verknüpfen, Apparat, Quellen/Referenzen, Register, Wörterbücher, Briefe)<br><br><b>Verknüpfungsmöglichkeiten und deren Visualisierung</b>                                                    |

|                                                           |                                                                                                                                                                                |                                                                                                               |                           |               |                                                                                                                                                                                          |
|-----------------------------------------------------------|--------------------------------------------------------------------------------------------------------------------------------------------------------------------------------|---------------------------------------------------------------------------------------------------------------|---------------------------|---------------|------------------------------------------------------------------------------------------------------------------------------------------------------------------------------------------|
| <b>K 4</b>                                                |                                                                                                                                                                                |                                                                                                               |                           |               |                                                                                                                                                                                          |
| <b>Modularität/Anpassbarkeit</b>                          |                                                                                                                                                                                |                                                                                                               |                           |               |                                                                                                                                                                                          |
| <i>Benennung</i>                                          | <i>Beschreibung</i>                                                                                                                                                            | <i>Bewertung</i>                                                                                              | <i>Bezug</i>              | <i>Quelle</i> | <i>Reduktion</i>                                                                                                                                                                         |
| vom Interviewer thematisiert, vom Befragten konkretisiert | Individualisierbarkeit im Hinblick auf verschiedene Auszeichnungs-Arten                                                                                                        | Wichtiger Aspekt, aber problematisch im Hinblick auf Zusammenarbeit                                           | Kollaboration/Kooperation | \I26-6\       | K 4.3c<br>Schemata und Metadaten- bzw. Auszeichnungs-Konzepte anpassen/nachnutzen und eigene einbinden<br><br><b>Inhalte</b>                                                             |
| <b>K 5</b>                                                |                                                                                                                                                                                |                                                                                                               |                           |               |                                                                                                                                                                                          |
| <b>Kollaboration/Kooperation</b>                          |                                                                                                                                                                                |                                                                                                               |                           |               |                                                                                                                                                                                          |
| <i>Benennung</i>                                          | <i>Beschreibung</i>                                                                                                                                                            | <i>Bewertung</i>                                                                                              | <i>Bezug</i>              | <i>Quelle</i> | <i>Reduktion</i>                                                                                                                                                                         |
| selbst thematisiert                                       | Baseline Encoding, verschiedene Auszeichnungs-Interessen - z.B. je nach Fach - bestehen lassen, trotzdem gemeinsames Projekt, zusätzliche Unterscheidungen in der Auszeichnung | guter Gedanke, mehr als ein Notbehelf, muss man zum Konzept machen, Problem des sich überschneidenden Markups | Produktion/Manipulation   | \I26-12\      | K 5.1d<br>Standards, TEI, Unabhängigkeit von Datenformaten<br><br><b>Austausch von Inhalten und Werkzeugen</b>                                                                           |
| selbst thematisiert                                       | kollaboratives Tool auf der Basis inhaltlicher, sachlicher Auszeichnung                                                                                                        | Wäre ein großer Fortschritt                                                                                   | Produktion/Manipulation   | \I26-15\      | K 5.2a<br>Zusammenarbeit in Teams von verschiedenen Orten aus, auch an einem Dokument, verteilte Bearbeitung verschiedener ‚Schichten‘ eines Dokuments usw.<br><br><b>Zusammenarbeit</b> |

## I26 Extraktion

|                                                           |                                                                                                                                                             |                                            |                           |               |                                                                                                                                                                                  |
|-----------------------------------------------------------|-------------------------------------------------------------------------------------------------------------------------------------------------------------|--------------------------------------------|---------------------------|---------------|----------------------------------------------------------------------------------------------------------------------------------------------------------------------------------|
|                                                           |                                                                                                                                                             |                                            |                           |               |                                                                                                                                                                                  |
| <b>K 6</b>                                                |                                                                                                                                                             |                                            |                           |               |                                                                                                                                                                                  |
| <b>Organisation/Verwaltung</b>                            |                                                                                                                                                             |                                            |                           |               |                                                                                                                                                                                  |
| <i>Benennung</i>                                          | <i>Beschreibung</i>                                                                                                                                         | <i>Bewertung</i>                           | <i>Bezug</i>              | <i>Quelle</i> | <i>Reduktion</i>                                                                                                                                                                 |
| selbst thematisiert                                       | langfristiges Tragen des Werkzeugs im Hinblick auf Langfristprojekte, Etablierung                                                                           | Wichtiger Aspekt                           | Produktion/Manipulation   | \I26-2\       | K 6.1b<br>Datenspeicherung und –verwaltung, Langzeitarchivierung, verbunden mit Bearbeitungsmöglichkeiten und Nachnutzung<br><br><b>Organisation und Verwaltung von Inhalten</b> |
| vom Interviewer thematisiert, vom Befragten konkretisiert | Überblick über den Workflow der Arbeiten als Voraussetzung zur Verteilung, muss von Tools unterstützt werden, Basis für die Nachhaltung                     | Ansätze in TextGrid vorhanden              | Kollaboration/Kooperation | \I26-8\       | K 6.2a<br>Workflow-Organisation, Projekt-Verwaltung<br><br><b>Organisation und Verwaltung von Arbeitsprozessen</b>                                                               |
| vom Interviewer thematisiert, vom Befragten konkretisiert | Gliederung in Projekte, andererseits Workflow nachhalten, Arbeitsschritte, Zuständigkeiten, auch graphisch präsentieren, Arbeitsorganisation, Rechtevergabe | Ansatz in TG vorhanden, deutliche Vorteile | Kollaboration/Kooperation | \I26-9\       | K 6.2a<br>Workflow-Organisation, Projekt-Verwaltung<br><br><b>Organisation und Verwaltung von Arbeitsprozessen</b>                                                               |
| selbst thematisiert                                       | dauerhafte Datenspeicherung                                                                                                                                 | echtes und großes Problem, Grid-           |                           | \I26-10\      | K 6.1b<br>Datenspeicherung und                                                                                                                                                   |



## I26 Extraktion

|                                                                 |                                                                                                                                                                                                                 |                                                                              |                           |          |                                                                                                                                                                                                                                                                                  |
|-----------------------------------------------------------------|-----------------------------------------------------------------------------------------------------------------------------------------------------------------------------------------------------------------|------------------------------------------------------------------------------|---------------------------|----------|----------------------------------------------------------------------------------------------------------------------------------------------------------------------------------------------------------------------------------------------------------------------------------|
|                                                                 |                                                                                                                                                                                                                 | Struktur evtl. nützlich                                                      |                           |          | –verwaltung,<br>Langzeitarchivierung,<br>verbunden mit<br>Bearbeitungs-<br>möglichkeiten und<br>Nachnutzung<br><br><b>Organisation und<br/>         Verwaltung von<br/>         Inhalten</b>                                                                                     |
| vom Interviewer<br>thematisiert, vom Befragten<br>konkretisiert | Edition nicht nur als<br>Objekt organisieren,<br>sondern auch die<br>verteilte Arbeit ihrer<br>Erstellung, auch<br>dezentrale Arbeit an ein<br>und demselben<br>Dokument mit Sperrung<br>usw., Rechteverteilung | wichtiger Aspekte,<br>Ansätze auch in<br>TextGrid, dafür gibt<br>es Lösungen | Kollaboration/Kooperation | \I26-10\ | K 6.1a<br>Versionenverwaltung<br><br><b>Organisation und<br/>         Verwaltung von<br/>         Inhalten</b><br><br>und<br><br>K 6.2a<br>Workflow-Organisation,<br>Projekt-Verwaltung<br><br><b>Organisation und<br/>         Verwaltung von<br/>         Arbeitsprozessen</b> |
