# Supplementary material
Source: publisher site journal article supplement (https://www.degruyterbrill.com/publication/isbn/9783110463927/downloadAsset/9783110463927_Extraktionen_Reduktionen_fallbezogen.zip)
Supplement: Supplementary file 20 [file I27 Extraktion und Reduktion.pdf › fallbezogene Extraktionen und Reduktionen/I27 Extraktion und Reduktion.pdf]

## I27 Extraktion

| <b>TÄTIGKEITEN UND EDV-ERFAHRUNG</b>                                                                                                                                                                                                                                            |                                                                 |                                                                                                                                                        |                                                  |               |                                                                                                                                          |
|---------------------------------------------------------------------------------------------------------------------------------------------------------------------------------------------------------------------------------------------------------------------------------|-----------------------------------------------------------------|--------------------------------------------------------------------------------------------------------------------------------------------------------|--------------------------------------------------|---------------|------------------------------------------------------------------------------------------------------------------------------------------|
| <b>Tätigkeiten</b>                                                                                                                                                                                                                                                              |                                                                 |                                                                                                                                                        |                                                  |               |                                                                                                                                          |
| <i>Gegenstände</i>                                                                                                                                                                                                                                                              | <i>Methoden/Verfahren</i>                                       | <i>Ziele/Fragen</i>                                                                                                                                    | <i>Institutioneller Rahmen</i>                   | <i>Quelle</i> |                                                                                                                                          |
| fakultätsübergreifende Lehre im Bereich digitale Geisteswissenschaften, Administration in einem Zentrum für eHumanities, Mitglied eines virtuellen Instituts für digitale Editionen/Erschließung, Schwerpunkt digitale Editionen, Dissertation und Publikationen in dem Bereich | Lehre, Leitung und Organisation des Zentrums, digitales Edieren | Studierende fit machen für digitale Geisteswissenschaften, administrative Ziele des Zentrums, Forschungsziele digitale Editionen                       | Universität, Forschungs- bzw. Editionszenrum     | \I27-1\       |                                                                                                                                          |
| gelernter Historiker                                                                                                                                                                                                                                                            |                                                                 |                                                                                                                                                        |                                                  | \I27-12\      |                                                                                                                                          |
| <b>Erfahrung</b>                                                                                                                                                                                                                                                                |                                                                 |                                                                                                                                                        |                                                  |               |                                                                                                                                          |
|                                                                                                                                                                                                                                                                                 | <i>Beschreibung</i>                                             | <i>Bewertung</i>                                                                                                                                       |                                                  | <i>Quelle</i> |                                                                                                                                          |
|                                                                                                                                                                                                                                                                                 | Schwerpunkt digitale Edition, Lehre im Bereich Humanities IT    | hohe EDV-Erfahrung mit Bezug zu digitalen Editionen                                                                                                    |                                                  | \I27-1\       |                                                                                                                                          |
| <b>BEDARFSKATEGORIEN</b>                                                                                                                                                                                                                                                        |                                                                 |                                                                                                                                                        |                                                  |               |                                                                                                                                          |
| <b>K 1 Bedienbarkeit</b>                                                                                                                                                                                                                                                        |                                                                 |                                                                                                                                                        |                                                  |               |                                                                                                                                          |
| <i>Benennung</i>                                                                                                                                                                                                                                                                | <i>Beschreibung</i>                                             | <i>Bewertung</i>                                                                                                                                       | <i>Bezug</i>                                     | <i>Quelle</i> | <i>Reduktion</i>                                                                                                                         |
| selbst thematisiert                                                                                                                                                                                                                                                             | Stand-Alone-Application statt browser-basiert                   | entspricht nicht dem Trend, ich hätte versucht, es browser-basiert zu machen, Einarbeitung schwieriger, ungewohnte Außenumgebung in Eclipse, Hürde für | Produktion/Manipulation, Organisation/Verwaltung | \I27-3\       | K 1.2c Zurechtfinden, Komponenten und Sichten zuordnen ist am Anfang schwierig (evtl. gewohnte Website- und Ordnerstrukturierung besser) |

## I27 Extraktion

|                                                                 |                                                                                                                                                                                                         |                                                                                      |              |               |                                                                                                                                                                                                                                         |
|-----------------------------------------------------------------|---------------------------------------------------------------------------------------------------------------------------------------------------------------------------------------------------------|--------------------------------------------------------------------------------------|--------------|---------------|-----------------------------------------------------------------------------------------------------------------------------------------------------------------------------------------------------------------------------------------|
|                                                                 |                                                                                                                                                                                                         | Erstnutzer,<br>möglicherweise aber<br>Anreiz durch<br>umfassendes Tool<br>hoch genug |              |               | <b>Orientierung /<br/>Übersichtlichkeit /<br/>Oberflächen-<br/>gestaltung</b>                                                                                                                                                           |
| vom Interviewer<br>thematisiert, vom Befragten<br>konkretisiert | etwas schaffen, was für den<br>traditionellen<br>Geisteswissenschaftler<br>unmittelbar und leicht<br>benutzbar ist, ihn abholt<br>und weiterführt,<br>Problematik, dass es nicht<br>browser-basiert ist | entscheidende<br>Herausforderung für<br>TG, skeptisch,<br>Einstiegshürde             |              | \I27-15\      | K 1.1.a<br>zu schwierig / technisch<br>für fachwissenschaftliche<br>Nutzer, steile Lernkurve<br>für herkömmlich<br>Edierende<br>und<br>K 1.1b<br>gute Benutzbarkeit wäre<br>wichtig<br><br><b>Benutzerführung /<br/>Erlernbarkeit</b>   |
| <b>K 2<br/>Rezeption/Zugriff</b>                                |                                                                                                                                                                                                         |                                                                                      |              |               |                                                                                                                                                                                                                                         |
| <i>Benennung</i>                                                | <i>Beschreibung</i>                                                                                                                                                                                     | <i>Bewertung</i>                                                                     | <i>Bezug</i> | <i>Quelle</i> | <i>Reduktion</i>                                                                                                                                                                                                                        |
| selbst thematisiert                                             | Suchfunktion in einem<br>dahinter liegenden<br>Suchraum                                                                                                                                                 | Erwartung, aber<br>beeinflusst von<br>Vorinformation                                 |              | \I27-2\       | K 2.2b<br>Leichte Zugänglichkeit,<br>Übersicht durch Browser,<br>Suchmasken, Ontologien,<br>Klassifizierungen,<br>Indizierungen,<br>Strukturierungen<br><br><b>Zugriffsformen,<br/>Rezeptions- und<br/>Recherche-<br/>möglichkeiten</b> |

## I27 Extraktion

|                                                           |                                                                                                             |                                                                                                     |                         |          |                                                                                                                                                                                                                                                                       |
|-----------------------------------------------------------|-------------------------------------------------------------------------------------------------------------|-----------------------------------------------------------------------------------------------------|-------------------------|----------|-----------------------------------------------------------------------------------------------------------------------------------------------------------------------------------------------------------------------------------------------------------------------|
| vom Interviewer thematisiert, vom Befragten konkretisiert | Grundlagenmaterial über TextGrid abgreifen, Datenbestände von Zeno, digitalisierte Bibliotheken und Archive | hätte man gerne, Frage der Organisation, Aufgabenverteilung, evtl. nur zugreifen auf andere Portale | Organisation/Verwaltung | \I27-7\  | K 2.1a<br>kostenloser Zugriff auf unterschiedliche Repositorien bzw. Ressourcen (z.B. Wörterbücher), Quellen und Ausgaben/ Editionen, Vergleichsmöglichkeiten mit anderen Projekten/ Quellen, orts- und rechnerunabhängiger Zugriff<br><br><b>Zugriff auf Inhalte</b> |
| vom Interviewer thematisiert, vom Befragten konkretisiert | Zwischenschicht Metadatenportale, zentrale Portale, auf die TG zugreifen könnte                             | Idealszenario                                                                                       | Organisation/Verwaltung | \I27-7\  | K 2.2b<br>Leichte Zugänglichkeit, Übersicht durch Browser, Suchmasken, Ontologien, Klassifizierungen, Indizierungen, Strukturierungen<br><br><b>Zugriffsformen, Rezeptions- und Recherche-möglichkeiten</b>                                                           |
| vom Interviewer thematisiert, vom Befragten konkretisiert | zusätzliche browser-basierte Informationsebene, bisher Werkzeugkasten-Wahrnehmung                           | Wäre sehr wichtig, kommt aber darauf an, wie sich TG definiert                                      | Bedienbarkeit           | \I27-17\ | K 2.2b<br>Leichte Zugänglichkeit, Übersicht durch Browser, Suchmasken, Ontologien, Klassifizierungen, Indizierungen,                                                                                                                                                  |

|                                        |                                                                                                                                                                                 |                                                                                                                                                                          |              |               |                                                                                                                                                     |
|----------------------------------------|---------------------------------------------------------------------------------------------------------------------------------------------------------------------------------|--------------------------------------------------------------------------------------------------------------------------------------------------------------------------|--------------|---------------|-----------------------------------------------------------------------------------------------------------------------------------------------------|
|                                        |                                                                                                                                                                                 |                                                                                                                                                                          |              |               | Strukturierungen<br><br><b>Zugriffsformen,<br/>Rezeptions- und<br/>Recherche-<br/>möglichkeiten</b>                                                 |
| <b>K 3<br/>Produktion/Manipulation</b> |                                                                                                                                                                                 |                                                                                                                                                                          |              |               |                                                                                                                                                     |
| <i>Benennung</i>                       | <i>Beschreibung</i>                                                                                                                                                             | <i>Bewertung</i>                                                                                                                                                         | <i>Bezug</i> | <i>Quelle</i> | <i>Reduktion</i>                                                                                                                                    |
| selbst thematisiert                    | Arbeitsumgebung mit einem Editor im Zentrum und verschiedenen weiteren angekoppelten Funktionalitäten, spezialisierte Tools: Lemmatisierer, Text-Bild-Verknüpfung               | Erwartung, aber durch vorherige Information beeinflusst                                                                                                                  |              | \I27-2\       | K 3.4a<br>Arbeitsumgebung mit Tool-Angebot, nicht alles neu /selbst programmieren, kostenlos<br><br><b>Produktions-<br/>unterstützung allgemein</b> |
| selbst thematisiert                    | TBLE unterstützt neue Methodologie, Nähe der Transkription zur Vorlage wird betont, konvergent zu Entwicklungen im methodischen Bereich wie Visual Turn und Material Philologie | sehr erfreut, nicht ganz auf Funktionalität ausgetestet, sehr wichtiges Feature, das so auch in anderen Editionstools nicht vorhanden ist, unterstützt neue Methodologie |              | \I27-6\       | K 3.3d<br>Verknüpfungsmöglichkeiten Text-Bild, Transkriptions-/Faksimile-Ansicht<br><br><b>Verknüpfungsmöglichkeiten und deren Visualisierung</b>   |
| selbst thematisiert                    | Lemmatisierer                                                                                                                                                                   | Wichtiges Tool                                                                                                                                                           |              | \I27-6\       | K 3.4a<br>Arbeitsumgebung mit Tool-Angebot, nicht alles neu /selbst programmieren, kostenlos                                                        |

## I27 Extraktion

|                     |                                                                                                                                                                                                                                  |                                      |                           |          |                                                                                                                                                                                                                                                                                |
|---------------------|----------------------------------------------------------------------------------------------------------------------------------------------------------------------------------------------------------------------------------|--------------------------------------|---------------------------|----------|--------------------------------------------------------------------------------------------------------------------------------------------------------------------------------------------------------------------------------------------------------------------------------|
|                     |                                                                                                                                                                                                                                  |                                      |                           |          | <b>Produktions-<br/>unterstützung allgemein</b>                                                                                                                                                                                                                                |
| selbst thematisiert | Semantisierung,<br>Verknüpfung der<br>Annotation mit Externem,<br>Personenidentifikation,<br>Ortsidentifikation - in<br>Verbindung mit<br>kontrollierten Vokabularen<br>und Normdaten, mit PND<br>oder Google-Maps<br>verknüpfen | ganz interessant                     | Kollaboration/Kooperation | \I27-6\  | K 3.3a<br>Verknüpfungs-<br>möglichkeiten Text-Text<br>(z.B. editionswiss.<br>Kommentarfunktionen,<br>Varianten verknüpfen,<br>Apparat,<br>Quellen/Referenzen,<br>Register, Wörterbücher,<br>Briefe)<br><br><b>Verknüpfungs-<br/>möglichkeiten und<br/>deren Visualisierung</b> |
| selbst thematisiert | sieht TG vor allem als<br>Arbeitsumgebung                                                                                                                                                                                        |                                      |                           | \I27-8\  | K 3.4a<br>Arbeitsumgebung mit<br>Tool-Angebot, nicht alles<br>neu /selbst<br>programmieren, kostenlos<br><br><b>Produktions-<br/>unterstützung allgemein</b>                                                                                                                   |
| selbst thematisiert | starke Verzahnung von Text<br>und Bild als Möglichkeit<br>für neue Erkenntnisse,<br>bildliche Organisation von<br>Text hat ihren eigenen<br>Aussagewert, abstrahierter<br>Text schiebt sich vor das<br>Dokument                  | Möglichkeit für neue<br>Erkenntnisse | Rezeption/Zugriff         | \I27-12\ | K 3.3d<br>Verknüpfungs-<br>möglichkeiten Text-Bild,<br>Transkriptions-<br>/Faksimile-Ansicht<br><br><b>Verknüpfungs-<br/>möglichkeiten und</b>                                                                                                                                 |

## I27 Extraktion

|                                                           |                                                                                                                                                                                                           |                                   |                           |          | <b>deren Visualisierung</b>                                                                                                                                                                                                                                                                                 |
|-----------------------------------------------------------|-----------------------------------------------------------------------------------------------------------------------------------------------------------------------------------------------------------|-----------------------------------|---------------------------|----------|-------------------------------------------------------------------------------------------------------------------------------------------------------------------------------------------------------------------------------------------------------------------------------------------------------------|
| selbst thematisiert                                       | semantische Vernetzung und Identifizierung von Dokumenten und Dingen                                                                                                                                      | Möglichkeit für neue Erkenntnisse | Rezeption/Zugriff         | \I27-12\ | <p>K 3.1c<br/> Auszeichnungsmöglichkeiten /<br/> Informationsanreicherung zur Bearbeitung neuer Fragestellungen, tiefere Auszeichnung, spezifischere Auszeichnung je nach Forschungsinteresse (z.B. Musikwissenschaft), semantische Auszeichnung, Informationsmodellierung</p> <p><b>XML-Produktion</b></p> |
| vom Interviewer thematisiert, vom Befragten konkretisiert | tiefe semantische Erschließung und Verknüpfung eher in thematischen oder portalmäßigen Projekten außerhalb von TG, Annotationsprinzip im erweiterten Sinne auf der Kommentarebene, Diskurs über Dokumente |                                   | Kollaboration/Kooperation | \I27-13\ | <p>K 3.1c<br/> Auszeichnungsmöglichkeiten /<br/> Informationsanreicherung zur Bearbeitung neuer Fragestellungen, tiefere Auszeichnung, spezifischere Auszeichnung je nach Forschungsinteresse (z.B. Musikwissenschaft), semantische Auszeichnung, Informationsmodellierung</p> <p><b>XML-Produktion</b></p> |

## I27 Extraktion

|                                                                 |                                                                                                                                                                                                                                                                                                                |                 |                                                       |          |                                                                                                                                                                                    |
|-----------------------------------------------------------------|----------------------------------------------------------------------------------------------------------------------------------------------------------------------------------------------------------------------------------------------------------------------------------------------------------------|-----------------|-------------------------------------------------------|----------|------------------------------------------------------------------------------------------------------------------------------------------------------------------------------------|
|                                                                 |                                                                                                                                                                                                                                                                                                                |                 |                                                       |          | und<br><br>K 3.3c<br>kollaborative<br>Kommentierungen durch<br>Nutzer,<br>Agenda/Korrigenda,<br>Notepad<br><br><b>Verknüpfungs-<br/>möglichkeiten und<br/>deren Visualisierung</b> |
| vom Interviewer<br>thematisiert, vom Befragten<br>konkretisiert | gegenseitiges Annotieren<br>der Community, z.B. auf<br>Kommentarebene,<br>TG als Portal, das<br>Annotationsschicht sichtbar<br>macht, in der über<br>Dokumente gesprochen<br>wird, Frage, wo gespeichert<br>wird, andere Schicht als das<br>unmittelbare Erarbeiten<br>oder Verarbeiten von XML-<br>Dokumenten | fraglich        | Organisation/Verwaltung,<br>Kollaboration/Kooperation | \I27-14\ | K 3.3c<br>kollaborative<br>Kommentierungen durch<br>Nutzer,<br>Agenda/Korrigenda,<br>Notepad<br><br><b>Verknüpfungs-<br/>möglichkeiten und<br/>deren Visualisierung</b>            |
| selbst thematisiert                                             | Text-Bild-verknüpfung für<br>Transkriptionen,<br>Lemmatisierer                                                                                                                                                                                                                                                 | nützliche Tools |                                                       | \I27-16\ | K 3.3d<br>Verknüpfungs-<br>möglichkeiten Text-Bild,<br>Transkriptions-<br>/Faksimile-Ansicht<br><br><b>Verknüpfungs-<br/>möglichkeiten und<br/>deren Visualisierung</b>            |

## I27 Extraktion

|                                                           |                                                                                            |                                                                                                                                                                         |                                                                                   |               |                                                                                                                                       |
|-----------------------------------------------------------|--------------------------------------------------------------------------------------------|-------------------------------------------------------------------------------------------------------------------------------------------------------------------------|-----------------------------------------------------------------------------------|---------------|---------------------------------------------------------------------------------------------------------------------------------------|
|                                                           |                                                                                            |                                                                                                                                                                         |                                                                                   |               |                                                                                                                                       |
| <b>K 4</b>                                                |                                                                                            |                                                                                                                                                                         |                                                                                   |               |                                                                                                                                       |
| <b>Modularität/Anpassbarkeit</b>                          |                                                                                            |                                                                                                                                                                         |                                                                                   |               |                                                                                                                                       |
| <i>Benennung</i>                                          | <i>Beschreibung</i>                                                                        | <i>Bewertung</i>                                                                                                                                                        | <i>Bezug</i>                                                                      | <i>Quelle</i> | <i>Reduktion</i>                                                                                                                      |
| selbst thematisiert                                       | Möglichkeit zur Einbindung von Ressourcen, die woanders liegen                             | Erwartung, beeinflusst durch Vorinformation                                                                                                                             |                                                                                   | \I27-2\       | K 4.3a<br>Anschließbarkeit/<br>Nachnutzung von<br>Ressourcen, Formate<br>mappen<br><br><b>Inhalte</b>                                 |
| vom Interviewer thematisiert                              | Personalisierung durch Projektbezug, sonst sehe ich noch nichts zur Personalisierung in TG | projektbezug problematisch, aber langfristig schon sinnvoll                                                                                                             | Organisation/Verwaltung                                                           | \I27-5\       | K 4.1b<br>Anpassbarkeit der<br>Organisation (z.B.<br>Rollenmanagement,<br>Workflows)<br><br><b>TextGrid-Oberfläche /<br/>Umgebung</b> |
| selbst thematisiert                                       | Anschließen von Datenbeständen                                                             | naheliegend, einfach und vernünftig, weiß aber nicht, wie weit die Öffnung der eigenen Datenbestände für eine weitere Community schon implementiert oder vorgesehen ist | Rezeption/Zugriff,<br>Organisation/Verwaltung                                     | \I27-5\       | K 4.3a<br>Anschließbarkeit/<br>Nachnutzung von<br>Ressourcen, Formate<br>mappen<br><br><b>Inhalte</b>                                 |
| vom Interviewer thematisiert, vom Befragten konkretisiert | Einbinden von Tools erfordert hohes technisches Know-How                                   | relativ advancedes Feature, weiß nicht, wann die Community wirklich da hin kommt, klassische Geisteswissenschaftler                                                     | Produktion/Manipulation,<br>Organisation/Verwaltung,<br>Kollaboration/Kooperation | \I27-5\       | K 4.2a<br>Anschließbarkeit und<br>Kombinierbarkeit von<br>Tools und Services, auch<br>von selbstentwickelten –<br>modulares Konzept   |



## I27 Extraktion

|                                                           |                                                                                                            |                                                                                                                       |                                                  |               |                                                                                                                                                                                          |
|-----------------------------------------------------------|------------------------------------------------------------------------------------------------------------|-----------------------------------------------------------------------------------------------------------------------|--------------------------------------------------|---------------|------------------------------------------------------------------------------------------------------------------------------------------------------------------------------------------|
|                                                           |                                                                                                            | kennen die Tools evtl. gar nicht und wissen vor allem nicht, wie man sie einbauen kann, eher projektintern bewältigen |                                                  |               | <b>Tools und Services</b>                                                                                                                                                                |
| vom Interviewer thematisiert, vom Befragten konkretisiert | Gestaltung von Workflows                                                                                   | in längerfristigen Projekten möglich, bei Einzelforschern skeptisch, weil Denken in Workflows nicht typisch ist       | Produktion/Manipulation, Organisation/Verwaltung | \I27-10\      | K 4.1b<br>Anpassbarkeit der Organisation (z.B. Rollenmanagement, Workflows)<br><br><b>TextGrid-Oberfläche / Umgebung</b>                                                                 |
| <b>K 5<br/>Kollaboration/Kooperation</b>                  |                                                                                                            |                                                                                                                       |                                                  |               |                                                                                                                                                                                          |
| <i>Benennung</i>                                          | <i>Beschreibung</i>                                                                                        | <i>Bewertung</i>                                                                                                      | <i>Bezug</i>                                     | <i>Quelle</i> | <i>Reduktion</i>                                                                                                                                                                         |
| vom Interviewer thematisiert                              | Zusammenarbeit von verschiedenen Orten aus am selben Dokument                                              | hoch gegriffen, wenn man das lösen kann, ist man sehr weit, für größere Projekte relevant, für Einzelforscher weniger | Organisation/Verwaltung                          | \I27-11\      | K 5.2a<br>Zusammenarbeit in Teams von verschiedenen Orten aus, auch an einem Dokument, verteilte Bearbeitung verschiedener ‚Schichten‘ eines Dokuments usw.<br><br><b>Zusammenarbeit</b> |
| selbst thematisiert                                       | XML und TEI führen dazu, unsere Modelle explizit zu machen, damit auch schärfer und präziser, dadurch erst | Möglichkeit für neue Erkenntnisse                                                                                     | Produktion/Manipulation                          | \I27-12\      | K 5.1d<br>Standards, TEI, Unabhängigkeit von Datenformaten                                                                                                                               |

|                                        |                                                                                                                                                                                                                         |                                                                                                            |                         |               |                                                                                                                                                                                                                                                                                                                                |
|----------------------------------------|-------------------------------------------------------------------------------------------------------------------------------------------------------------------------------------------------------------------------|------------------------------------------------------------------------------------------------------------|-------------------------|---------------|--------------------------------------------------------------------------------------------------------------------------------------------------------------------------------------------------------------------------------------------------------------------------------------------------------------------------------|
|                                        | projektübergreifend und korpusweit mit ähnlichen Konzepten arbeiten können                                                                                                                                              |                                                                                                            |                         |               | <b>Austausch von Inhalten und Werkzeugen</b>                                                                                                                                                                                                                                                                                   |
| selbst thematisiert                    | Unterstützung der standardisierten Vorgehensweise bei der Erschließung als TG-Aufgabe, Standardisierung für die Community, PND-Nummer, TEI-Schemata, Frage nach didaktische Funktion, Best Practices als Rücklauf in TG | Bedeutung der Aufgabe von TG                                                                               | Produktion/Manipulation | \I27-13\      | <p>K 5.1d<br/>Standards, TEI, Unabhängigkeit von Datenformaten</p> <p><b>Austausch von Inhalten und Werkzeugen</b></p> <p>und</p> <p>K 5.3b<br/>Community-Building erforderlich, Umdenken erforderlich, durch Überzeugungsarbeit, Veranstaltungen und Erfahrungsaustausch anregen</p> <p><b>Community-Building-Aspekte</b></p> |
| <b>K 6<br/>Organisation/Verwaltung</b> |                                                                                                                                                                                                                         |                                                                                                            |                         |               |                                                                                                                                                                                                                                                                                                                                |
| <i>Benennung</i>                       | <i>Beschreibung</i>                                                                                                                                                                                                     | <i>Bewertung</i>                                                                                           | <i>Bezug</i>            | <i>Quelle</i> | <i>Reduktion</i>                                                                                                                                                                                                                                                                                                               |
| selbst thematisiert                    | Zwang zum Projekt anlegen und Rechte vergeben, Überspringen und später nutzen als Alternative                                                                                                                           | Hürde, vor allem für klassisch arbeitende Geisteswissenschaftler, Möglichkeit zum Überspringen wäre besser | Bedienbarkeit           | \I27-4\       | <p>K 6.2a<br/>Workflow-Organisation, Projekt-Verwaltung</p> <p><b>Organisation und Verwaltung von Arbeitsprozessen</b></p>                                                                                                                                                                                                     |

## I27 Extraktion

|                                                           |                                                                                                                                                                                                     |                                                                                                                                 |                         |         |                                                                                                                                                                                  |
|-----------------------------------------------------------|-----------------------------------------------------------------------------------------------------------------------------------------------------------------------------------------------------|---------------------------------------------------------------------------------------------------------------------------------|-------------------------|---------|----------------------------------------------------------------------------------------------------------------------------------------------------------------------------------|
|                                                           |                                                                                                                                                                                                     |                                                                                                                                 |                         |         |                                                                                                                                                                                  |
| vom Interviewer thematisiert, vom Befragten konkretisiert | in TG erarbeitete Dinge im Grid speichern, nicht lokal, und je nach Rechtekonfiguration von überall zugreifbar machen                                                                               | Idealszenario                                                                                                                   | Rezeption/Zugriff       | \I27-7\ | K 6.1b<br>Datenspeicherung und –verwaltung, Langzeitarchivierung, verbunden mit Bearbeitungsmöglichkeiten und Nachnutzung<br><br><b>Organisation und Verwaltung von Inhalten</b> |
| vom Interviewer thematisiert, vom Befragten konkretisiert | Idee der Verwaltung von Wissen/Metadatenwissen eher außerhalb von TG, TG bietet aber Zugang dazu, Erzeugung von Metadaten bei in TG erstellten Daten                                                | Wichtiger Aspekt, ohne Metadaten nicht nachnutzbar                                                                              |                         | \I27-8\ | K 6.1b<br>Datenspeicherung und –verwaltung, Langzeitarchivierung, verbunden mit Bearbeitungsmöglichkeiten und Nachnutzung<br><br><b>Organisation und Verwaltung von Inhalten</b> |
| vom Interviewer thematisiert, vom Befragten konkretisiert | TG kann zu einer Entwicklung beitragen, indem Bewusstsein für die Bedeutung von Workflows geschaffen wird, etablierte Workflows existieren noch nicht, TG kann Workflows vorschlagen, z.B. für eine | sinnvoller Ansatz, der in die Zukunft weist, aber nicht auf etablierten Mustern aufsetzen kann, worin die Schwierigkeit besteht | Produktion/Manipulation | \I27-9\ | K 6.2a<br>Workflow-Organisation, Projekt-Verwaltung<br><br><b>Organisation und Verwaltung von Arbeitsprozessen</b>                                                               |

## I27 Extraktion

|                                                           |                                                                       |                      |                           |          |                                                                                                                    |
|-----------------------------------------------------------|-----------------------------------------------------------------------|----------------------|---------------------------|----------|--------------------------------------------------------------------------------------------------------------------|
|                                                           | Briefedition, und Feedback sammeln                                    |                      |                           |          |                                                                                                                    |
| vom Interviewer thematisiert, vom Befragten konkretisiert | Einfache Workflows auch visualisieren, um den Einstieg zu erleichtern |                      | Kollaboration/Kooperation | \I27-11\ | K 6.2a<br>Workflow-Organisation, Projekt-Verwaltung<br><br><b>Organisation und Verwaltung von Arbeitsprozessen</b> |
| selbst thematisiert                                       | Workflow-Operationalisierung und Kollaborationsunterstützung          | nützliche Funktionen |                           | \I27-16\ | K 6.2a<br>Workflow-Organisation, Projekt-Verwaltung<br><br><b>Organisation und Verwaltung von Arbeitsprozessen</b> |
