# Supplementary material
Source: publisher site journal article supplement (https://www.degruyterbrill.com/publication/isbn/9783110463927/downloadAsset/9783110463927_Extraktionen_Reduktionen_fallbezogen.zip)
Supplement: Supplementary file 21 [file I28 Extraktion und Reduktion.pdf › fallbezogene Extraktionen und Reduktionen/I28 Extraktion und Reduktion.pdf]

## I28 Extraktion

| <b>TÄTIGKEITEN UND EDV-ERFAHRUNG</b>                                                 |                                                                                                         |                                                                                              |                                               |               |                                                                                                                                                                                       |
|--------------------------------------------------------------------------------------|---------------------------------------------------------------------------------------------------------|----------------------------------------------------------------------------------------------|-----------------------------------------------|---------------|---------------------------------------------------------------------------------------------------------------------------------------------------------------------------------------|
| <b>Tätigkeiten</b>                                                                   |                                                                                                         |                                                                                              |                                               |               |                                                                                                                                                                                       |
| <i>Gegenstände</i>                                                                   | <i>Methoden/Verfahren</i>                                                                               | <i>Ziele/Fragen</i>                                                                          | <i>Institutioneller Rahmen</i>                | <i>Quelle</i> |                                                                                                                                                                                       |
| Edition, Nachlass eines Schriftstellers und Verlegers aus dem 18. Jhd., 20000 Briefe | digitale Erfassung, digitales Edieren von verschiedenen Personen und Orten aus, Indizierung             | Versuch, den riesigen Nachlass für die Forschung zu erschließen                              | Universität, Forschungs- bzw. Editionsprojekt | \I28-1\       |                                                                                                                                                                                       |
| <b>Erfahrung</b>                                                                     |                                                                                                         |                                                                                              |                                               |               |                                                                                                                                                                                       |
|                                                                                      | <i>Beschreibung</i>                                                                                     | <i>Bewertung</i>                                                                             |                                               | <i>Quelle</i> |                                                                                                                                                                                       |
|                                                                                      | Arbeit mit Projekt-eigenem Transkriptions-Tool das dezentrales Zusammenarbeiten ermöglicht (Pilotphase) | praktische Erfahrung im digitalen Edieren, Literaturwissenschaftler/ Editionswissenschaftler |                                               | \I28-1\       |                                                                                                                                                                                       |
|                                                                                      | Quellcode schreiben                                                                                     | bisherige Praxis                                                                             |                                               | \I28-6\       |                                                                                                                                                                                       |
| <b>BEDARFSKATEGORIEN</b>                                                             |                                                                                                         |                                                                                              |                                               |               |                                                                                                                                                                                       |
| <b>K 1 Bedienbarkeit</b>                                                             |                                                                                                         |                                                                                              |                                               |               |                                                                                                                                                                                       |
| <i>Benennung</i>                                                                     | <i>Beschreibung</i>                                                                                     | <i>Bewertung</i>                                                                             | <i>Bezug</i>                                  | <i>Quelle</i> | <i>Reduktion</i>                                                                                                                                                                      |
| selbst thematisiert                                                                  | Workshop Zeitrahmen                                                                                     | relativ kurz                                                                                 |                                               | \I28-2\       | K 1.1h schwer zu beurteilen, weil im Workshop geführt bzw. nur an einem Bsp. gearbeitet wurde, zu wenig Zeit war, Tool nicht fertig war<br><br><b>Benutzerführung / Erlernbarkeit</b> |
| selbst thematisiert                                                                  | WYSIWYG-Schicht wie in der Textverarbeitung, Quellcode im                                               | Wäre ein großer Vorzug, würde viele Leute einbinden, für den                                 | Produktion/Manipulation                       | \I28-6\       | K 1.4b Arbeiten wie in der „normalen“                                                                                                                                                 |

## I28 Extraktion

|                                  |                                                                                                          |                                      |                           |               |                                                                                                                                                                                                                                      |
|----------------------------------|----------------------------------------------------------------------------------------------------------|--------------------------------------|---------------------------|---------------|--------------------------------------------------------------------------------------------------------------------------------------------------------------------------------------------------------------------------------------|
|                                  | Hintergrund, höhere Benutzerfreundlichkeit, intuitive Bedienung                                          | kundigen Nutzer ist es schon optimal |                           |               | Textverarbeitung ermöglichen, Vermeidung von spitzen Klammern, XML-Generierung im Hintergrund<br><br><b>Bedienbarkeit der Auszeichnungsebene</b>                                                                                     |
| selbst thematisiert              | Workshops veranstalten                                                                                   | positiv                              | Kollaboration/Kooperation | \I28-16\      | K 1.1g Schulungen für technisch weniger versierte Nutzer, Schritt-für-Schritt-Anleitung, Heranführen/Einbinden der Community, didaktischer Prozess, Mehrwerte vermitteln, Testprojekte<br><br><b>Benutzerführung / Erlernbarkeit</b> |
| <b>K 2<br/>Rezeption/Zugriff</b> |                                                                                                          |                                      |                           |               |                                                                                                                                                                                                                                      |
| <i>Benennung</i>                 | <i>Beschreibung</i>                                                                                      | <i>Bewertung</i>                     | <i>Bezug</i>              | <i>Quelle</i> | <i>Reduktion</i>                                                                                                                                                                                                                     |
| selbst thematisiert              | Wunsch, in einem System mit ein paar Klicks alles greifbar zu haben, in dem alles mit allem vernetzt ist | Wunsch                               | Produktion/Manipulation   | \I28-2\       | K 2.1a kostenloser Zugriff auf unterschiedliche Repositorien bzw. Ressourcen (z.B. Wörterbücher), Quellen und                                                                                                                        |

## I28 Extraktion

|                                                           |                                                                                                                                                               |           |                          |         |                                                                                                                                                                                                                                                                               |
|-----------------------------------------------------------|---------------------------------------------------------------------------------------------------------------------------------------------------------------|-----------|--------------------------|---------|-------------------------------------------------------------------------------------------------------------------------------------------------------------------------------------------------------------------------------------------------------------------------------|
|                                                           |                                                                                                                                                               |           |                          |         | <p>Ausgaben/ Editionen, Vergleichsmöglichkeiten mit anderen Projekten/ Quellen, orts- und rechnerunabhängiger Zugriff</p> <p><b>Zugriff auf Inhalte</b></p>                                                                                                                   |
| vom Interviewer thematisiert, vom Befragten konkretisiert | Komfort der vernetzten Editionen, die ermöglichen, nicht Büchern hinterherzulaufen, sondern die Sachen gleich in den nötigen Verästelungen vorliegen zu haben | Wunsch    | Produktion/Manipulation, | \I28-4\ | <p>K 2.1a<br/>kostenloser Zugriff auf unterschiedliche Repositorien bzw. Ressourcen (z.B. Wörterbücher), Quellen und Ausgaben/ Editionen, Vergleichsmöglichkeiten mit anderen Projekten/ Quellen, orts- und rechnerunabhängiger Zugriff</p> <p><b>Zugriff auf Inhalte</b></p> |
| selbst thematisiert                                       | mehr automatisch Verlinkungen und Indizierungen anbieten                                                                                                      | Erwartung |                          | \I28-6\ | <p>K 2.2b<br/>Leichte Zugänglichkeit, Übersicht durch Browser, Suchmasken, Ontologien, Klassifizierungen, Indizierungen,</p>                                                                                                                                                  |

## I28 Extraktion

|                                                           |                                                                    |                                                                                                  |                         |          |                                                                                                                                                                                                                                                                       |
|-----------------------------------------------------------|--------------------------------------------------------------------|--------------------------------------------------------------------------------------------------|-------------------------|----------|-----------------------------------------------------------------------------------------------------------------------------------------------------------------------------------------------------------------------------------------------------------------------|
|                                                           |                                                                    |                                                                                                  |                         |          | Strukturierungen<br><br><b>Zugriffsformen, Rezeptions- und Recherche-möglichkeiten</b>                                                                                                                                                                                |
| vom Interviewer thematisiert, vom Befragten konkretisiert | Zugriff auf eine Vielzahl von Editionen, Durchsuchbarkeit          | immenser Wert, skeptisch, was die technische Umsetzung angeht, Speicherung auf welchen Servern?  | Organisation/Verwaltung | \I28-9\  | K 2.1a<br>kostenloser Zugriff auf unterschiedliche Repositorien bzw. Ressourcen (z.B. Wörterbücher), Quellen und Ausgaben/ Editionen, Vergleichsmöglichkeiten mit anderen Projekten/ Quellen, orts- und rechnerunabhängiger Zugriff<br><br><b>Zugriff auf Inhalte</b> |
| vom Interviewer thematisiert, vom Befragten konkretisiert | Ordnung und Zugänglichkeit am ehesten durch gute Metasuchmaschinen | Recherchieren finde ich nicht schlimm, Anreiz im Detektivischen des wissenschaftlichen Arbeitens |                         | \I28-10\ | K 2.2b<br>Leichte Zugänglichkeit, Übersicht durch Browser, Suchmasken, Ontologien, Klassifizierungen, Indizierungen, Strukturierungen<br><br><b>Zugriffsformen,</b>                                                                                                   |

|                                |                                                                                                                       |                                                 |                   |               |                                                                                                                                                                                                             |
|--------------------------------|-----------------------------------------------------------------------------------------------------------------------|-------------------------------------------------|-------------------|---------------|-------------------------------------------------------------------------------------------------------------------------------------------------------------------------------------------------------------|
|                                |                                                                                                                       |                                                 |                   |               | <b>Rezeptions- und Recherche-möglichkeiten</b>                                                                                                                                                              |
| selbst thematisiert            | vieles leichter zugänglich und quantitativ besser, neue Erkenntnisse rein durch technische Möglichkeit sehe ich nicht | quantitative Mehrwerte, kein Erkenntnismehrwert |                   | \I28-11\      | K 2.2b<br>Leichte Zugänglichkeit, Übersicht durch Browser, Suchmasken, Ontologien, Klassifizierungen, Indizierungen, Strukturierungen<br><br><b>Zugriffsformen, Rezeptions- und Recherche-möglichkeiten</b> |
| <b>K 3</b>                     |                                                                                                                       |                                                 |                   |               |                                                                                                                                                                                                             |
| <b>Produktion/Manipulation</b> |                                                                                                                       |                                                 |                   |               |                                                                                                                                                                                                             |
| <i>Benennung</i>               | <i>Beschreibung</i>                                                                                                   | <i>Bewertung</i>                                | <i>Bezug</i>      | <i>Quelle</i> | <i>Reduktion</i>                                                                                                                                                                                            |
| selbst thematisiert            | Netzwerk von Briefkorrespondenz verwirklichen                                                                         | Wunsch                                          | Rezeption/Zugriff | \I28-2\       | K 3.3a<br>Verknüpfungsmöglichkeiten Text-Text (z.B. editionswiss. Kommentarfunktionen, Varianten verknüpfen, Apparat, Quellen/Referenzen, Register, Wörterbücher, Briefe)<br><br><b>Verknüpfungs-</b>       |

## I28 Extraktion

|                                                           |                                                                                                                                                                                        |                                                    |                   |         | <b>möglichkeiten und deren Visualisierung</b>                                                                                                                                             |
|-----------------------------------------------------------|----------------------------------------------------------------------------------------------------------------------------------------------------------------------------------------|----------------------------------------------------|-------------------|---------|-------------------------------------------------------------------------------------------------------------------------------------------------------------------------------------------|
| vom Interviewer thematisiert, vom Befragten konkretisiert | Netz der Brief-Korrespondenz nachvollziehbar machen mit digitalen Editionen, im Druck höchstens über gute Register - wenn vorhanden - möglich, mit zwei Editionen auf dem Schreibtisch | Wunsch, Fortschritt zur Print-Edition              | Rezeption/Zugriff | \I28-3\ | K 3.3b<br>Visualisierung von Beziehungen (z. B. in Briefnetzen),<br>Mustererkennung<br><br><b>Verknüpfungsmöglichkeiten und deren Visualisierung</b>                                      |
| vom Interviewer thematisiert                              | Funktionalität, man konnte noch nicht loslegen                                                                                                                                         | etwas enttäuscht, steckt noch in den Kinderschuhen |                   | \I28-5\ | K 3.4a<br>Arbeitsumgebung mit Tool-Angebot, nicht alles neu /selbst programmieren, kostenlos<br><br><b>Produktionsunterstützung allgemein</b>                                             |
| selbst thematisiert                                       | WYSIWYG-Schicht, Quellcode entsteht im Hintergrund                                                                                                                                     | Hoffnung                                           | Bedienbarkeit     | \I28-6\ | K 3.1b<br>XML-Auszeichnungs- bzw. Produktionshilfe, Tools zur digitalen Herstellung und Verfügbarmachung von Texten, XML-Schemata vorgefertigt für verschiedene individuelle Bedürfnisse, |

## I28 Extraktion

|                                                           |                                                                                                      |                                               |                   |          |                                                                                                                                                                                                                                            |
|-----------------------------------------------------------|------------------------------------------------------------------------------------------------------|-----------------------------------------------|-------------------|----------|--------------------------------------------------------------------------------------------------------------------------------------------------------------------------------------------------------------------------------------------|
|                                                           |                                                                                                      |                                               |                   |          | Konvertierung in XML/TEI, Baseline Encoding, Streaming Editor, Unterstützung bei zunächst geringerer Auszeichnungstiefe<br><br><b>XML-Produktion</b>                                                                                       |
| selbst thematisiert                                       | in der Kommentierung auf alles mögliche verweisen, was im Netz steht, nicht nur auf andere Editionen | Wunsch                                        |                   | \I28-10\ | K 3.3a<br>Verknüpfungsmöglichkeiten Text-Text (z.B. editionswiss. Kommentarfunktionen, Varianten verknüpfen, Apparat, Quellen/Referenzen, Register, Wörterbücher, Briefe)<br><br><b>Verknüpfungsmöglichkeiten und deren Visualisierung</b> |
| vom Interviewer thematisiert, vom Befragten konkretisiert | neue Einsichten durch bessere Darstellungsmöglichkeiten                                              | Wäre wünschenswert, kann ich nicht abschätzen | Rezeption/Zugriff | \I28-12\ | K 3.2b<br>Unterschiede durch Textvergleich (Kollationierung, TBLE) visualisieren, Schreiberhände vergleichen, Textgenese, Entwicklungsprozess rekonstruieren und                                                                           |

## I28 Extraktion

|                                                           |                                                                      |                                                                                                       |                         |               |                                                                                                                                                          |
|-----------------------------------------------------------|----------------------------------------------------------------------|-------------------------------------------------------------------------------------------------------|-------------------------|---------------|----------------------------------------------------------------------------------------------------------------------------------------------------------|
|                                                           |                                                                      |                                                                                                       |                         |               | darstellen, Schichten und Räumlichkeit darstellen, multiperspektivischen Zugang schaffen<br><br><b>Analyse- und Visualisierungsmöglichkeiten</b>         |
| vom Interviewer thematisiert, vom Befragten konkretisiert | Text-Bild-Linkeditor                                                 | muss ich nicht unbedingt haben, für komplexe Werkhandschriften mit Marginalien usw. evtl. interessant |                         | \I28-14\      | K 3.3d<br>Verknüpfungsmöglichkeiten Text-Bild, Transkriptions-/Faksimile-Ansicht<br><br><b>Verknüpfungsmöglichkeiten und deren Visualisierung</b>        |
| <b>K 4</b><br><b>Modularität/Anpassbarkeit</b>            |                                                                      |                                                                                                       |                         |               |                                                                                                                                                          |
| <i>Benennung</i>                                          | <i>Beschreibung</i>                                                  | <i>Bewertung</i>                                                                                      | <i>Bezug</i>            | <i>Quelle</i> | <i>Reduktion</i>                                                                                                                                         |
| selbst thematisiert                                       | Möglichkeit, in irgendeiner Form anzudocken mit einem ähnlichen Tool | Erwartung                                                                                             | Produktion/Manipulation | \I28-2\       | K 4.2a<br>Anschließbarkeit und Kombinierbarkeit von Tools und Services, auch von selbstentwickelten – modulares Konzept<br><br><b>Tools und Services</b> |
| vom Interviewer thematisiert, vom Befragten               | Anschluss der eigenen Edition an eine Plattform,                     | Wunsch                                                                                                |                         | \I28-4\       | K 4.3a<br>Anschließbarkeit/                                                                                                                              |



## I28 Extraktion

|                                                           |                                                                                                                             |                                                                                                                                                                                   |                                            |          |                                                                                                                                                          |
|-----------------------------------------------------------|-----------------------------------------------------------------------------------------------------------------------------|-----------------------------------------------------------------------------------------------------------------------------------------------------------------------------------|--------------------------------------------|----------|----------------------------------------------------------------------------------------------------------------------------------------------------------|
| konkretisiert                                             | Vernetzungsmöglichkeiten                                                                                                    |                                                                                                                                                                                   |                                            |          | Nachnutzung von Ressourcen, Formate mappen<br><br><b>Inhalte</b>                                                                                         |
| vom Interviewer thematisiert, vom Befragten konkretisiert | Anpassung an die eigene Arbeitsweise, individuelle Auszeichnungs- und Darstellungsformen in verschiedenen Editionen         | Wünschenswert, berechtigt, aber problematisch für den Nutzer der Edition, der sich jeweils einarbeiten muss, einfach Grundverschiedenes online stellen – damit ist es nicht getan | Produktion/Manipulation, Rezeption/Zugriff | \I28-7\  | K 4.3c<br>Schemata und Metadaten- bzw. Auszeichnungs-Konzepte anpassen/nachnutzen und eigene einbinden<br><br><b>Inhalte</b>                             |
| vom Interviewer thematisiert, vom Befragten konkretisiert | gewohnte Tools weinternutzen und an TG anschließen                                                                          | Wunderbar, Umsetzbarkeit unklar                                                                                                                                                   | Produktion/Manipulation                    | \I28-8\  | K 4.2a<br>Anschließbarkeit und Kombinierbarkeit von Tools und Services, auch von selbstentwickelten – modulares Konzept<br><br><b>Tools und Services</b> |
| selbst thematisiert                                       | nahtloses Andocken/Integration an/in eine/r Plattform mit maximalen Synergieeffekten durch Vernetzung mit anderen Projekten | größter Fortschritt                                                                                                                                                               | Kollaboration/Kooperation                  | \I28-16\ | K 4.3b<br>Erweiterbare / veränderbare Projekte / Objekte / Editionen<br><br><b>Inhalte</b>                                                               |
| <b>K 5<br/>Kollaboration/Kooperation</b>                  |                                                                                                                             |                                                                                                                                                                                   |                                            |          |                                                                                                                                                          |

## I28 Extraktion

| <i>Benennung</i>                       | <i>Beschreibung</i>                                                                                     | <i>Bewertung</i>                            | <i>Bezug</i>              | <i>Quelle</i> | <i>Reduktion</i>                                                                                                                                                                     |
|----------------------------------------|---------------------------------------------------------------------------------------------------------|---------------------------------------------|---------------------------|---------------|--------------------------------------------------------------------------------------------------------------------------------------------------------------------------------------|
| selbst thematisiert                    | möglichst flächendeckendes Publikum erreichen, Community-Aufbau                                         | größte/s Problem / Herausforderung          | Bedienbarkeit             | \I28-16\      | K 5.3b<br>Community-Building erforderlich, Umdenken erforderlich, durch Überzeugungsarbeit, Veranstaltungen und Erfahrungsaustausch anregen<br><br><b>Community-Building-Aspekte</b> |
| <b>K 6<br/>Organisation/Verwaltung</b> |                                                                                                         |                                             |                           |               |                                                                                                                                                                                      |
| <i>Benennung</i>                       | <i>Beschreibung</i>                                                                                     | <i>Bewertung</i>                            | <i>Bezug</i>              | <i>Quelle</i> | <i>Reduktion</i>                                                                                                                                                                     |
| selbst thematisiert                    | Speicherproblematik, Editionen auf separaten Servern, auf einem TG-Megaserver?                          | überschaue nicht, was technisch möglich ist |                           | \I28-9\       | K 6.1b<br>Datenspeicherung und –verwaltung, Langzeitarchivierung, verbunden mit Bearbeitungsmöglichkeiten und Nachnutzung<br><br><b>Organisation und Verwaltung von Inhalten</b>     |
| selbst thematisiert                    | TG evtl. als Schnittstelle zwischen Content-Anbietern, Darstellung und Publikation der Briefwechsel und | problematisch                               | Kollaboration/Kooperation | \I28-15\      | K 6.1b<br>Datenspeicherung und –verwaltung, Langzeitarchivierung, verbunden mit                                                                                                      |

## I28 Extraktion

|  |                                                                                                                                                                                                                 |  |  |  |                                                                                                         |
|--|-----------------------------------------------------------------------------------------------------------------------------------------------------------------------------------------------------------------|--|--|--|---------------------------------------------------------------------------------------------------------|
|  | <p>vernetzter Editionen, Digitalisate und Transkriptionen ist letztlich ein organisatorisches Problem, liegen auf verschiedenen Servern von verschiedenen Institutionen, die sie nicht einfach so rausgeben</p> |  |  |  | <p>Bearbeitungsmöglichkeiten und Nachnutzung</p> <p><b>Organisation und Verwaltung von Inhalten</b></p> |
|--|-----------------------------------------------------------------------------------------------------------------------------------------------------------------------------------------------------------------|--|--|--|---------------------------------------------------------------------------------------------------------|
