# Supplementary material
Source: publisher site journal article supplement (https://www.degruyterbrill.com/publication/isbn/9783110463927/downloadAsset/9783110463927_Extraktionen_Reduktionen_fallbezogen.zip)
Supplement: Supplementary file 22 [file I3 Extraktion und Reduktion.pdf › fallbezogene Extraktionen und Reduktionen/I3 Extraktion und Reduktion.pdf]

### I3 Extraktion

| <b>TÄTIGKEITEN UND EDV-ERFAHRUNG</b>                       |                                                                                                                                                                                             |                                                                               |                                |               |                                                                                                                                                                                              |
|------------------------------------------------------------|---------------------------------------------------------------------------------------------------------------------------------------------------------------------------------------------|-------------------------------------------------------------------------------|--------------------------------|---------------|----------------------------------------------------------------------------------------------------------------------------------------------------------------------------------------------|
| <b>Tätigkeiten</b>                                         |                                                                                                                                                                                             |                                                                               |                                |               |                                                                                                                                                                                              |
| <i>Gegenstände</i>                                         | <i>Methoden/Verfahren</i>                                                                                                                                                                   | <i>Ziele/Fragen</i>                                                           | <i>Institutioneller Rahmen</i> | <i>Quelle</i> |                                                                                                                                                                                              |
| Text als Quellen und Ressourcen, Digitalisierungs-Workflow | Scan-Digitalisierung, Identifizierungsschemata, ablegen/speichern, Konvertierung in ein Zielformat, v.a. XML/TEI, OCR/Volltexterfassung per Hand                                            | digitalisierte ausgezeichnete Texte, Workflow-Optimierung, Studenten anleiten | Akademie-Projekt               | \I3-1\        |                                                                                                                                                                                              |
| <b>Erfahrung</b>                                           |                                                                                                                                                                                             |                                                                               |                                |               |                                                                                                                                                                                              |
|                                                            | <i>Beschreibung</i>                                                                                                                                                                         | <i>Bewertung</i>                                                              |                                | <i>Quelle</i> |                                                                                                                                                                                              |
|                                                            | ausgebildete Philologin, XML/TEI erfahren, Erfahrung mit verschiedenen Editoren, Programmiererfahrung, Erfahrung in Digitalisierungsverfahren und -workflows: Scans, OCR, Volltexterfassung | hoch                                                                          |                                | \I3-1\        |                                                                                                                                                                                              |
| <b>BEDARFSKATEGORIEN</b>                                   |                                                                                                                                                                                             |                                                                               |                                |               |                                                                                                                                                                                              |
| <b>K 1 Bedienbarkeit</b>                                   |                                                                                                                                                                                             |                                                                               |                                |               |                                                                                                                                                                                              |
| <i>Benennung</i>                                           | <i>Beschreibung</i>                                                                                                                                                                         | <i>Bewertung</i>                                                              | <i>Bezug</i>                   | <i>Quelle</i> | <i>Reduktion</i>                                                                                                                                                                             |
| vom Interviewer thematisiert                               | am Anfang zurechtfinden; Icons, Komponenten und Sichten zuordnen                                                                                                                            | unübersichtlich, schwierig                                                    | Produktion/Manipulation        | \I3-7\        | K 1.2c<br>Zurechtfinden, Komponenten und Sichten zuordnen ist am Anfang schwierig (evtl. gewohnte Website- und Ordnerstrukturierung besser)<br><br><b>Orientierung / Übersichtlichkeit /</b> |

### I3 Extraktion

|                                  |                                                                                                      |                                                                      |                         |               |                                                                                                                                                                                                                            |
|----------------------------------|------------------------------------------------------------------------------------------------------|----------------------------------------------------------------------|-------------------------|---------------|----------------------------------------------------------------------------------------------------------------------------------------------------------------------------------------------------------------------------|
|                                  |                                                                                                      |                                                                      |                         |               | <b>Oberflächengestaltung</b>                                                                                                                                                                                               |
| vom Interviewer thematisiert     | unterschiedliche Navigations- bzw. Bedienungsmöglichkeiten                                           | zunächst verwirrend, im Prinzip gut                                  | Produktion/Manipulation | \I3-7\        | K 1.1e<br>anfangs steile Lernkurve, Einarbeitung notwendig, danach gut (z.B. bzgl. unterschiedlicher Navigations- und Bedienungsmöglichkeiten für dasselbe Ziel, menulastig)<br><br><b>Benutzerführung / Erlernbarkeit</b> |
| vom Interviewer thematisiert     | allgemeine Erlernbarkeit                                                                             | zunächst steile Lernkurve, danach gut                                | Produktion/Manipulation | \I3-8\        | K 1.1e<br>anfangs steile Lernkurve, Einarbeitung notwendig, danach gut (z.B. bzgl. unterschiedlicher Navigations- und Bedienungsmöglichkeiten für dasselbe Ziel, menulastig)<br><br><b>Benutzerführung / Erlernbarkeit</b> |
| <b>K 2<br/>Rezeption/Zugriff</b> |                                                                                                      |                                                                      |                         |               |                                                                                                                                                                                                                            |
| <i>Benennung</i>                 | <i>Beschreibung</i>                                                                                  | <i>Bewertung</i>                                                     | <i>Bezug</i>            | <i>Quelle</i> | <i>Reduktion</i>                                                                                                                                                                                                           |
| selbst thematisiert              | Zugriff auf verschiedene Ressourcen unter einer Haube, z.B. Wörterbücher, auch mittels Lemmatisierer | wünschenswert, aber nicht spektakulär, schwierig wegen Datenformaten |                         | \I3-3\        | K 2.1a<br>kostenloser Zugriff auf unterschiedliche Repositorien bzw. Ressourcen (z.B. Wörterbücher), Quellen und Ausgaben/ Editionen, Vergleichsmöglichkeiten mit anderen Projekten/ Quellen,                              |

### I3 Extraktion

|                                              |                                                                                                                                                                                      |                                |                         |               |                                                                                                                                                                                                                                                                       |
|----------------------------------------------|--------------------------------------------------------------------------------------------------------------------------------------------------------------------------------------|--------------------------------|-------------------------|---------------|-----------------------------------------------------------------------------------------------------------------------------------------------------------------------------------------------------------------------------------------------------------------------|
|                                              |                                                                                                                                                                                      |                                |                         |               | orts- und rechnerunabhängiger Zugriff<br><br><b>Zugriff auf Inhalte</b>                                                                                                                                                                                               |
| selbst thematisiert                          | Zugriff auf verschiedene zusammengebundene Ressourcen                                                                                                                                | Wunsch                         |                         | \I3-4\        | K 2.1a<br>kostenloser Zugriff auf unterschiedliche Repositorien bzw. Ressourcen (z.B. Wörterbücher), Quellen und Ausgaben/ Editionen, Vergleichsmöglichkeiten mit anderen Projekten/ Quellen, orts- und rechnerunabhängiger Zugriff<br><br><b>Zugriff auf Inhalte</b> |
| selbst thematisiert                          | einfacher Ressourcenzugriff, nicht versteckt, nicht ein Portal neben dem anderen, auch Bilder und Ton-Dokumente, nicht nur lesender, sondern auch schreibender/annotierender Zugriff | Wunsch                         | Produktion/Manipulation | \I3-9\        | K 2.1c<br>nicht rein rezeptiver, sondern auch produktiver, „schreibender“ Zugriff, auch in der eigenen Forschungsumgebung, auch auf den Quellcode<br><br><b>Zugriff auf Inhalte</b>                                                                                   |
| <b>K 3</b><br><b>Produktion/Manipulation</b> |                                                                                                                                                                                      |                                |                         |               |                                                                                                                                                                                                                                                                       |
| <i>Benennung</i>                             | <i>Beschreibung</i>                                                                                                                                                                  | <i>Bewertung</i>               | <i>Bezug</i>            | <i>Quelle</i> | <i>Reduktion</i>                                                                                                                                                                                                                                                      |
| selbst thematisiert                          | Optimierung von Digitalisierungs-Workflows, Konvertierung in XML/TEI                                                                                                                 | Wichtiger Aspekt der Tätigkeit |                         | \I3-1\        | K 3.1b<br>XML-Auszeichnungs- bzw. Produktionshilfe, Tools zur digitalen Herstellung und                                                                                                                                                                               |

### I3 Extraktion

|                     |                                                                         |                                              |                           |         |                                                                                                                                                                                                                                                       |
|---------------------|-------------------------------------------------------------------------|----------------------------------------------|---------------------------|---------|-------------------------------------------------------------------------------------------------------------------------------------------------------------------------------------------------------------------------------------------------------|
|                     |                                                                         |                                              |                           |         | Verfügarmachung von Texten, XML-Schemata vorgefertigt für verschiedene individuelle Bedürfnisse, Konvertierung in XML/TEI, Baseline Encoding, Streaming Editor, Unterstützung bei zunächst geringerer Auszeichnungstiefe<br><br><b>XML-Produktion</b> |
| selbst thematisiert | Verwendung als XML-Editor                                               | andere sind bequemer, würde ich nicht nutzen | Modularität/Anpassbarkeit | \I3-2\  | K 3.1a<br>eigener XML-Editor ist nicht die Stärke von TextGrid, andere sind besser, nicht der richtige Schwerpunkt<br><br><b>XML-Produktion</b>                                                                                                       |
| selbst thematisiert | Comment Toggle, Umschalten des Kommentars im XML-Editor nicht vorhanden | Mangel in TG                                 |                           | \I3-6\  | K 3.3a<br>Verknüpfungsmöglichkeiten Text-Text (z.B. editionswiss. Kommentarfunktionen, Varianten verknüpfen, Apparat, Quellen/Referenzen, Register, Wörterbücher, Briefe)<br><br><b>Verknüpfungsmöglichkeiten und deren Visualisierung</b>            |
| selbst thematisiert | strukturelle und semantische Auszeichnung und Aufbereitung (Ontologie)  | Mehrwert                                     | Rezeption/Zugriff         | \I3-11\ | K 3.1c<br>Auszeichnungsmöglichkeiten / Informationsanreicherung zur                                                                                                                                                                                   |

### I3 Extraktion

|                     |                                                                                                                                        |                  |                   |         |                                                                                                                                                                                                                                                                                                       |
|---------------------|----------------------------------------------------------------------------------------------------------------------------------------|------------------|-------------------|---------|-------------------------------------------------------------------------------------------------------------------------------------------------------------------------------------------------------------------------------------------------------------------------------------------------------|
|                     | mit dem Ziel neuer Sortierungen und neue Fragestellungen, Bsp. Wörterbücher als schon stark strukturierte Dokumenttypen                |                  |                   |         | <p>Bearbeitung neuer Fragestellungen, tiefere Auszeichnung, spezifischere Auszeichnung je nach Forschungsinteresse (z.B. Musikwissenschaft), semantische Auszeichnung, Informationsmodellierung</p> <p><b>XML-Produktion</b></p>                                                                      |
| selbst thematisiert | Informationen in Texte reinbringen, die in der Papierform nicht vorhanden sind, um dann andere Fragestellungen daran richten zu können | Wichtigstes Ziel | Rezeption/Zugriff | \I3-12\ | <p>K 3.1c<br/>Auszeichnungsmöglichkeiten / Informationsanreicherung zur Bearbeitung neuer Fragestellungen, tiefere Auszeichnung, spezifischere Auszeichnung je nach Forschungsinteresse (z.B. Musikwissenschaft), semantische Auszeichnung, Informationsmodellierung</p> <p><b>XML-Produktion</b></p> |
| selbst thematisiert | XML-Editor im Fokus                                                                                                                    | zu wenig         |                   | \I3-15\ | <p>K 3.1a<br/>eigener XML-Editor ist nicht die Stärke von TextGrid, andere sind besser, nicht der richtige Schwerpunkt</p> <p><b>XML-Produktion</b></p>                                                                                                                                               |

### I3 Extraktion

| <b>K 4</b>                       |                                                                                                                                                                                        |                                                         |                         |               |                                                                                                                                                          |
|----------------------------------|----------------------------------------------------------------------------------------------------------------------------------------------------------------------------------------|---------------------------------------------------------|-------------------------|---------------|----------------------------------------------------------------------------------------------------------------------------------------------------------|
| <b>Modularität/Anpassbarkeit</b> |                                                                                                                                                                                        |                                                         |                         |               |                                                                                                                                                          |
| <i>Benennung</i>                 | <i>Beschreibung</i>                                                                                                                                                                    | <i>Bewertung</i>                                        | <i>Bezug</i>            | <i>Quelle</i> | <i>Reduktion</i>                                                                                                                                         |
| selbst thematisiert              | eigenes XML-Schema einbinden, eigene Metadaten, TextGrid-Metadaten am Anfang verwirrend                                                                                                | sinnvoll                                                | Produktion/Manipulation | \I3-2\        | K 4.3c<br>Schemata und Metadaten- bzw. Auszeichnungs-Konzepte anpassen/nachnutzen und eigene einbinden<br><br><b>Inhalte</b>                             |
| selbst thematisiert              | eigene Lieblingsprogramme andocken, z.B. dieses graphische Linking-Tool oder einen Lemmatisierer, zentrale Oberfläche, Komponenten zusammenbinden, Kooperieren mit Programmherstellern | wünschenswert, besser Chancen für TG, genutzt zu werden | Produktion/Manipulation | \I3-2\        | K 4.2a<br>Anschließbarkeit und Kombinierbarkeit von Tools und Services, auch von selbstentwickelten – modulares Konzept<br><br><b>Tools und Services</b> |
| selbst thematisiert              | Anschließbarkeit eigener Ressourcen, Mapping der Zielformate                                                                                                                           | Wunsch                                                  |                         | \I3-4\        | K 4.3a<br>Anschließbarkeit/Nachnutzung von Ressourcen, Formate mappen<br><br><b>Inhalte</b>                                                              |
| selbst thematisiert              | eigenes Schema nicht hinzuladbar, spezielle TG-Metadaten                                                                                                                               | Problem                                                 | Produktion/Manipulation | \I3-6\        | K 4.3c<br>Schemata und Metadaten- bzw. Auszeichnungs-Konzepte anpassen/nachnutzen und eigene einbinden<br><br><b>Inhalte</b>                             |

### I3 Extraktion

|                                          |                                                                                                     |                                           |                                              |               |                                                                                                                                                                                                                                                                                                                   |
|------------------------------------------|-----------------------------------------------------------------------------------------------------|-------------------------------------------|----------------------------------------------|---------------|-------------------------------------------------------------------------------------------------------------------------------------------------------------------------------------------------------------------------------------------------------------------------------------------------------------------|
| selbst thematisiert                      | Schnittstellencharakter                                                                             | gut, weiter ausbauen                      | Kollaboration/Kooperation                    | \I3-15\       | <p>K 4.3a<br/>Anschließbarkeit/Nachnutzung von Ressourcen, Formate mappen</p> <p><b>Inhalte</b><br/>und<br/>K 4.2a<br/>Anschließbarkeit und Kombinierbarkeit von Tools und Services, auch von selbstentwickelten – modulares Konzept</p> <p><b>Tools und Services</b></p>                                         |
| <b>K 5<br/>Kollaboration/Kooperation</b> |                                                                                                     |                                           |                                              |               |                                                                                                                                                                                                                                                                                                                   |
| <i>Benennung</i>                         | <i>Beschreibung</i>                                                                                 | <i>Bewertung</i>                          | <i>Bezug</i>                                 | <i>Quelle</i> | <i>Reduktion</i>                                                                                                                                                                                                                                                                                                  |
| selbst thematisiert                      | Zusammenarbeit und Ressourcenaustausch statt überall eigene Ressourcen und Korpora mit eigenen GUIs | das eigentlich "Gridige", bei TG vermisst | Rezeption/Zugriff, Modularität/Anpassbarkeit | \I3-4\        | <p>K 5.2a<br/>Zusammenarbeit in Teams von verschiedenen Orten aus, auch an einem Dokument, verteilte Bearbeitung verschiedener ‚Schichten‘ eines Dokuments usw.</p> <p><b>Zusammenarbeit</b><br/>und<br/>K 5.1a<br/>Austausch von Ressourcen, Nachnutzung</p> <p><b>Austausch von Inhalten und Werkzeugen</b></p> |

### I3 Extraktion

|                     |                                                                                                                                                                        |                         |                                                    |         |                                                                                                                                                               |
|---------------------|------------------------------------------------------------------------------------------------------------------------------------------------------------------------|-------------------------|----------------------------------------------------|---------|---------------------------------------------------------------------------------------------------------------------------------------------------------------|
|                     |                                                                                                                                                                        |                         |                                                    |         |                                                                                                                                                               |
|                     | Bereitschaft der Gesellschaft/Community, ihre Daten abzugeben                                                                                                          | Problem, Einflussfaktor | Organisation/Verwaltung                            | \I3-5\  | K 5.1b<br>Austausch von Arbeits- bzw. Forschungsergebnissen, Bereitschaft dazu<br><br><b>Austausch von Inhalten und Werkzeugen</b>                            |
| selbst thematisiert | Forschungsergebnisse bei anderen andocken                                                                                                                              | Wunsch                  | Modularität/Anpassbarkeit, Produktion/Manipulation | \I3-9\  | K 5.1b<br>Austausch von Arbeits- bzw. Forschungsergebnissen, Bereitschaft dazu<br><br><b>Austausch von Inhalten und Werkzeugen</b>                            |
| selbst thematisiert | interdisziplinäre Zusammenarbeit zwischen Geistes- und Naturwissenschaften, bspw. physisch-chemische Untersuchungen von Textträgern, DNA-Analyse für Korpusfragen usw. | Wunsch                  | Produktion/Manipulation                            | \I3-10\ | K 5.2c<br>Interdisziplinäre Zusammenarbeit<br><br><b>Zusammenarbeit</b>                                                                                       |
| selbst thematisiert | Zusammenarbeit zwischen Digitalisierungsinstitutionen und Bibliotheken standardisieren, Mustervorgehen                                                                 | Wunsch                  |                                                    | \I3-13\ | K 5.2b<br>Zusammenarbeit zwischen Institutionen, Projekten, auch intern zwischen verschiedenen Stellen, mit Technikern, Workflow<br><br><b>Zusammenarbeit</b> |
| selbst thematisiert | TEI-Standardisierung von Textvorlagen                                                                                                                                  | Wunsch                  | Produktion/Manipulation                            | \I3-13\ | K 5.1d<br>Standards, TEI,                                                                                                                                     |



### I3 Extraktion

|                                        |                                                                                               |                                           |                         |               |                                                                                                                                                                                                                                      |
|----------------------------------------|-----------------------------------------------------------------------------------------------|-------------------------------------------|-------------------------|---------------|--------------------------------------------------------------------------------------------------------------------------------------------------------------------------------------------------------------------------------------|
|                                        |                                                                                               |                                           |                         |               | Unabhängigkeit von Datenformaten<br><br><b>Austausch von Inhalten und Werkzeugen</b>                                                                                                                                                 |
| selbst thematisiert                    | Austausch von Formaten und Arbeitsmitteln, Skripten usw.                                      | Wunsch, aber auch als Utopie eingeschätzt | Produktion/Manipulation | \I3-14\       | K 5.1c<br>Austausch von Arbeitsmitteln (Tools, Formaten, Skripten usw.)<br><br><b>Austausch von Inhalten und Werkzeugen</b>                                                                                                          |
| selbst thematisiert                    | Übersicht darüber, was andere machen, Kommunikationsplattform, Vereinheitlichung von Formaten | gut, ausbauen                             | Organisation/Verwaltung | \I3-15\       | K 5.1c<br>Austausch von Arbeitsmitteln (Tools, Formaten, Skripten usw.)<br><br><b>Austausch von Inhalten und Werkzeugen</b><br>und<br>K 5.3d<br>Kommunikationsplattform, Social-Anwendungen<br><br><b>Community-Building-Aspekte</b> |
| <b>K 6<br/>Organisation/Verwaltung</b> |                                                                                               |                                           |                         |               |                                                                                                                                                                                                                                      |
| <i>Benennung</i>                       | <i>Beschreibung</i>                                                                           | <i>Bewertung</i>                          | <i>Bezug</i>            | <i>Quelle</i> | <i>Reduktion</i>                                                                                                                                                                                                                     |
| selbst thematisiert                    | Löschen von Daten in TextGrid, bisher nur "Stilllegung"                                       | Wunsch, derzeit in TG problematisch       |                         | \I3-5\        | K 6.1e<br>Export und Löschen von Inhalten                                                                                                                                                                                            |

### I3 Extraktion

|                     |                                                                            |               |                           |         | <b>Organisation und<br/>Verwaltung von Inhalten</b>                                                                                                                                                                 |
|---------------------|----------------------------------------------------------------------------|---------------|---------------------------|---------|---------------------------------------------------------------------------------------------------------------------------------------------------------------------------------------------------------------------|
| selbst thematisiert | Speichern, Verschwunden<br>im Nirvana                                      | problematisch | Produktion/Manipulation   | \I3-6\  | K 6.1b<br>Datenspeicherung und<br>–verwaltung,<br>Langzeitarchivierung,<br>verbunden mit<br>Bearbeitungsmöglichkeiten<br>und Nachnutzung<br><br><b>Organisation und<br/>Verwaltung von Inhalten</b>                 |
| selbst thematisiert | Projekthandling,<br>Rechtevergabe, Freigabe für<br>Einsicht oder Mitarbeit | gut           | Produktion/Manipulation   | \I3-6\  | K 6.2a<br>Workflow-Organisation,<br>Projekt-Verwaltung<br><br><b>Organisation und<br/>Verwaltung von<br/>Arbeitsprozessen</b>                                                                                       |
| selbst thematisiert | Regelung für Rechte an<br>Images usw.                                      | Wunsch        | Kollaboration/Kooperation | \I3-13\ | K 6.1c<br>Adressierung, Zitierbarkeit,<br>Urheberrecht,<br>Leistungsanerkennung<br>und<br><br>K 6.1b<br>Datenspeicherung und<br>–verwaltung,<br>Langzeitarchivierung,<br>verbunden mit<br>Bearbeitungsmöglichkeiten |

### I3 Extraktion

|                     |                                                                                                                  |                                                               |  |         |                                                                                                                                                                                                                                                                                                   |
|---------------------|------------------------------------------------------------------------------------------------------------------|---------------------------------------------------------------|--|---------|---------------------------------------------------------------------------------------------------------------------------------------------------------------------------------------------------------------------------------------------------------------------------------------------------|
|                     |                                                                                                                  |                                                               |  |         | und Nachnutzung<br><b>Organisation und Verwaltung von Inhalten</b>                                                                                                                                                                                                                                |
| selbst thematisiert | Datenvorhaltung,<br>Langzeitverfügbarkeit,<br>Langzeitarchivierung,<br>persistente<br>Adressierung/Zitierbarkeit | Wichtige<br>Herausforderung<br>für vernetzte<br>Infrastruktur |  | \I3-14\ | K 6.1b<br>Datenspeicherung und<br>–verwaltung,<br>Langzeitarchivierung,<br>verbunden mit<br>Bearbeitungsmöglichkeiten<br>und Nachnutzung<br>und<br><br>K 6.1c<br>Adressierung, Zitierbarkeit,<br>Urheberrecht,<br>Leistungsanerkennung<br><br><b>Organisation und<br/>Verwaltung von Inhalten</b> |
| selbst thematisiert | Repositoriumscharakter                                                                                           | gut, weiter<br>ausbauen                                       |  | \I3-15\ | K 6.1b<br>Datenspeicherung und<br>–verwaltung,<br>Langzeitarchivierung,<br>verbunden mit<br>Bearbeitungsmöglichkeiten<br>und Nachnutzung<br><br><b>Organisation und<br/>Verwaltung von Inhalten</b>                                                                                               |
