# Supplementary material
Source: publisher site journal article supplement (https://www.degruyterbrill.com/publication/isbn/9783110463927/downloadAsset/9783110463927_Extraktionen_Reduktionen_fallbezogen.zip)
Supplement: Supplementary file 23 [file I4 Extraktion und Reduktion.pdf › fallbezogene Extraktionen und Reduktionen/I4 Extraktion und Reduktion.pdf]

# I4 Extraktion

| <b>TÄTIGKEITEN UND EDV-ERFAHRUNG</b>                                                                                                                                                                                                  |                                                                                                                                                                                                                                         |                                                                                                    |                                |               |  |
|---------------------------------------------------------------------------------------------------------------------------------------------------------------------------------------------------------------------------------------|-----------------------------------------------------------------------------------------------------------------------------------------------------------------------------------------------------------------------------------------|----------------------------------------------------------------------------------------------------|--------------------------------|---------------|--|
| <b>Tätigkeiten</b>                                                                                                                                                                                                                    |                                                                                                                                                                                                                                         |                                                                                                    |                                |               |  |
| <i>Gegenstände</i>                                                                                                                                                                                                                    | <i>Methoden/Verfahren</i>                                                                                                                                                                                                               | <i>Ziele/Fragen</i>                                                                                | <i>Institutioneller Rahmen</i> | <i>Quelle</i> |  |
| Edition: drei frühneuzeitliche Handschriften mit kritischem Apparat, Edition von Rechtsurkunden, auch Präsentation im Netz, Wortverzeichnis mit Rechtstermini und Auswertungen, dynamische Oberfläche, Sachen untereinander verbunden | edieren mit TUSTEP, Betreuung von Projekten mit TUSTEP, Registererstellung, Apparaterstellung, Satzvorlagen, Textvergleiche auch zwischen deutschsprachigen und fremdsprachlichen Texten, auch XML-Konvertierung                        | Editionsaufbereitung für den Druck, Sortierung und Auswertung, dynamische Präsentation             | wiss. Akademie und Universität | \I4-2\        |  |
| <b>Erfahrung</b>                                                                                                                                                                                                                      |                                                                                                                                                                                                                                         |                                                                                                    |                                |               |  |
|                                                                                                                                                                                                                                       | <i>Beschreibung</i>                                                                                                                                                                                                                     | <i>Bewertung</i>                                                                                   |                                | <i>Quelle</i> |  |
|                                                                                                                                                                                                                                       | lange Tustep-Erfahrung, parallel Word Perfect, Interesse für EDV, Versuch, auf dem Laufenden zu bleiben, aber keine Ahnung von Programmiersprachen, lernt immer nur programmbezogen, hauptsächlich TUSTEP und Office, XML Konvertierung | Textverarbeitung und Tustep hoch, einigermaßen auf dem Laufenden, bzgl. Programmiersprachen gering |                                | \I4-1\        |  |

# I4 Extraktion

| <b>BEDARFSKATEGORIEN</b>     |                                                                                                                                |                                                 |                         |               |                                                                                                                                                                                                                                                                                                                                                                                                                                                                     |
|------------------------------|--------------------------------------------------------------------------------------------------------------------------------|-------------------------------------------------|-------------------------|---------------|---------------------------------------------------------------------------------------------------------------------------------------------------------------------------------------------------------------------------------------------------------------------------------------------------------------------------------------------------------------------------------------------------------------------------------------------------------------------|
| <b>K 1<br/>Bedienbarkeit</b> |                                                                                                                                |                                                 |                         |               |                                                                                                                                                                                                                                                                                                                                                                                                                                                                     |
| <i>Benennung</i>             | <i>Beschreibung</i>                                                                                                            | <i>Bewertung</i>                                | <i>Bezug</i>            | <i>Quelle</i> | <i>Reduktion</i>                                                                                                                                                                                                                                                                                                                                                                                                                                                    |
| vom Interviewer thematisiert | Bereitschaft, Energie in das Erlernen von Programmen zu investieren, die viel können, in anspruchsvolle Ergebnisse investieren |                                                 | Produktion/Manipulation | \I4-8\        | K 1.1f<br>bereit, in das Erlernen von Programmen zu investieren, die viel können, in anspruchsvolle Ergebnisse<br><br><b>Benutzerführung /<br/>Erlernbarkeit</b>                                                                                                                                                                                                                                                                                                    |
| selbst thematisiert          | Hilfestellung bei Eingabe nach TEI-Konventionen                                                                                | Bedarf schwer zu beurteilen, zu wenig Erfahrung | Produktion/Manipulation | \I4-13\       | K 1.1e<br>anfangs steile Lernkurve, Einarbeitung notwendig, danach gut (z.B. bzgl. unterschiedlicher Navigations- und Bedienbarkeitsmöglichkeiten für dasselbe Ziel, menulastig)<br><br><b>Benutzerführung /<br/>Erlernbarkeit</b><br>und<br>K 1.4a<br>XML/TEI ist eine Hürde, Unterstützung durch das System ist notwendig, Heranführen/Hilfemenu, Reduzierung der Schwelle, aber keine Vermeidung von spitzen Klammern, Komplexität abbilden, fachliche Mehrwerte |

#### I4 Extraktion

|                                  |                                                                            |                                                        |                         |               |                                                                                                                                                                                                                                                                                               |
|----------------------------------|----------------------------------------------------------------------------|--------------------------------------------------------|-------------------------|---------------|-----------------------------------------------------------------------------------------------------------------------------------------------------------------------------------------------------------------------------------------------------------------------------------------------|
|                                  |                                                                            |                                                        |                         |               | vermitteln<br><br><b>Bedienbarkeit der<br/>Auszeichnungsebene</b>                                                                                                                                                                                                                             |
| selbst thematisiert              | Einarbeitung<br>notwendig, sieht aber<br>keine größeren<br>Schwierigkeiten |                                                        | Produktion/Manipulation | \I4-14\       | K 1.1e<br>anfangs steile Lernkurve,<br>Einarbeitung notwendig,<br>danach gut (z.B. bzgl.<br>unterschiedlicher Navigations-<br>und Bedienungsmöglichkeiten<br>für dasselbe Ziel, menulastig)<br><br><b>Benutzerführung /<br/>Erlernbarkeit</b>                                                 |
| <b>K 2<br/>Rezeption/Zugriff</b> |                                                                            |                                                        |                         |               |                                                                                                                                                                                                                                                                                               |
| <i>Benennung</i>                 | <i>Beschreibung</i>                                                        | <i>Bewertung</i>                                       | <i>Bezug</i>            | <i>Quelle</i> | <i>Reduktion</i>                                                                                                                                                                                                                                                                              |
| selbst thematisiert              | orts- und<br>rechnerunabhängiger<br>Zugriff auf Inhalte                    | interessant und<br>unterscheidend von<br>anderen Tools | Produktion/Manipulation | \I4-15\       | K 2.1a<br>kostenloser Zugriff auf<br>unterschiedliche Repositorien<br>bzw. Ressourcen (z.B.<br>Wörterbücher), Quellen und<br>Ausgaben/ Editionen,<br>Vergleichsmöglichkeiten mit<br>anderen Projekten/ Quellen,<br>orts- und rechnerunabhängiger<br>Zugriff<br><br><b>Zugriff auf Inhalte</b> |
| selbst thematisiert              | Erkenntnisse durch<br>Zugriff auf viele<br>Daten, Recherche und            | Potenzial für wiss.<br>Erkenntnisse                    |                         | \I4-19\       | K 2.1a<br>kostenloser Zugriff auf<br>unterschiedliche Repositorien                                                                                                                                                                                                                            |

#### I4 Extraktion

|                              |                                                                                                                                                   |                     |                                                    |         |                                                                                                                                                                                                                                                                                                                                                                          |
|------------------------------|---------------------------------------------------------------------------------------------------------------------------------------------------|---------------------|----------------------------------------------------|---------|--------------------------------------------------------------------------------------------------------------------------------------------------------------------------------------------------------------------------------------------------------------------------------------------------------------------------------------------------------------------------|
|                              | Analysemöglichkeiten auch aufgrund von Standards                                                                                                  |                     |                                                    |         | bzw. Ressourcen (z.B. Wörterbücher), Quellen und Ausgaben/ Editionen, Vergleichsmöglichkeiten mit anderen Projekten/ Quellen, orts- und rechnerunabhängiger Zugriff<br><br><b>Zugriff auf Inhalte</b>                                                                                                                                                                    |
| selbst thematisiert          | Erkenntnisse durch Zugriff auf Vergleichsmaterial und andere schon bearbeitete Inhalte zum eigenen Projekt, diesbzgl. Verständigung auf Standards | möglicher Mehrwert  | Produktion/Manipulation, Kollaboration/Kooperation | \I4-21\ | K 2.1a<br>kostenloser Zugriff auf unterschiedliche Repositorien bzw. Ressourcen (z.B. Wörterbücher), Quellen und Ausgaben/ Editionen, Vergleichsmöglichkeiten mit anderen Projekten/ Quellen, orts- und rechnerunabhängiger Zugriff<br>und<br>K 2.1b<br>Kostenloser Zugriff auf maschinell verarbeitete Daten und Forschungsergebnisse<br><br><b>Zugriff auf Inhalte</b> |
| vom Interviewer thematisiert | Zugriff auf Überblick über Forschungsthemen anderer, Möglichkeit, nach Leserechten zu fragen, in Verbindung mit Material und Werkzeugen           | wäre großer Vorteil | Kollaboration/Kooperation                          | \I4-22\ | K 2.2b<br>Leichte Zugänglichkeit, Übersicht durch Browser, Suchmasken, Ontologien, Klassifizierungen, Indizierungen, Strukturierungen<br><b>Zugriffsformen, Rezeptions-</b>                                                                                                                                                                                              |

## I4 Extraktion

|                                        |                                                                                                                                                                                                                                                                                            |                      |                           |               | <b>und Recherchemöglichkeiten</b>                                                                                                                                                                                                                                                                                                                                                                                                                                                             |
|----------------------------------------|--------------------------------------------------------------------------------------------------------------------------------------------------------------------------------------------------------------------------------------------------------------------------------------------|----------------------|---------------------------|---------------|-----------------------------------------------------------------------------------------------------------------------------------------------------------------------------------------------------------------------------------------------------------------------------------------------------------------------------------------------------------------------------------------------------------------------------------------------------------------------------------------------|
| <b>K 3<br/>Produktion/Manipulation</b> |                                                                                                                                                                                                                                                                                            |                      |                           |               |                                                                                                                                                                                                                                                                                                                                                                                                                                                                                               |
| <i>Benennung</i>                       | <i>Beschreibung</i>                                                                                                                                                                                                                                                                        | <i>Bewertung</i>     | <i>Bezug</i>              | <i>Quelle</i> | <i>Reduktion</i>                                                                                                                                                                                                                                                                                                                                                                                                                                                                              |
| selbst thematisiert                    | Zugriff auf Tools,<br>nicht alles selbst<br>programmieren, kein<br>reiner EDV-<br>Zuständiger im Team                                                                                                                                                                                      | Vorteil, positiv     | Kollaboration/Kooperation | \I4-4\        | K 3.4a<br>Arbeitsumgebung mit Tool-<br>Angebot, nicht alles neu<br>/selbst programmieren,<br>kostenlos<br><br><b>Produktionsunterstützung<br/>allgemein</b>                                                                                                                                                                                                                                                                                                                                   |
| selbst thematisiert                    | Möglichkeit, Daten<br>einzugeben, so dass<br>sehr genaue<br>Auswertung möglich<br>ist, unbegrenzt diese<br>Daten mit weiteren<br>Informationen<br>anreichern, z.B.<br>Edition: Textstellen<br>mit Vergleichstexten<br>verbinden oder mit<br>einem Bild der<br>handschriftlichen<br>Vorlage | braucht man, wichtig |                           | \I4-9\        | K 3.1c<br>Auszeichnungsmöglichkeiten /<br>Informationsanreicherung zur<br>Bearbeitung neuer<br>Fragestellungen, tiefere<br>Auszeichnung, spezifischere<br>Auszeichnung je nach<br>Forschungsinteresse (z.B.<br>Musikwissenschaft),<br>semantische Auszeichnung,<br>Informationsmodellierung<br><br><b>XML-Produktion<br/>und</b><br><br>K 3.3a<br>Verknüpfungsmöglichkeiten<br>Text-Text (z.B. editionswiss.<br>Kommentarfunktionen,<br>Varianten verknüpfen,<br>Apparat, Quellen/Referenzen, |

# I4 Extraktion

|                                  |                                                                                                                                                                                                                                                                                                   |                  |                           |               |                                                                                                                                                                                                                                                                      |
|----------------------------------|---------------------------------------------------------------------------------------------------------------------------------------------------------------------------------------------------------------------------------------------------------------------------------------------------|------------------|---------------------------|---------------|----------------------------------------------------------------------------------------------------------------------------------------------------------------------------------------------------------------------------------------------------------------------|
|                                  |                                                                                                                                                                                                                                                                                                   |                  |                           |               | <p>Register, Wörterbücher, Briefe) und</p> <p>K 3.3d<br/>Verknüpfungsmöglichkeiten Text-Bild, Transkriptions-/Faksimile-Ansicht</p> <p><b>Verknüpfungsmöglichkeiten und deren Visualisierung</b></p>                                                                 |
| <b>K 4</b>                       |                                                                                                                                                                                                                                                                                                   |                  |                           |               |                                                                                                                                                                                                                                                                      |
| <b>Modularität/Anpassbarkeit</b> |                                                                                                                                                                                                                                                                                                   |                  |                           |               |                                                                                                                                                                                                                                                                      |
| <i>Benennung</i>                 | <i>Beschreibung</i>                                                                                                                                                                                                                                                                               | <i>Bewertung</i> | <i>Bezug</i>              | <i>Quelle</i> | <i>Reduktion</i>                                                                                                                                                                                                                                                     |
| selbst thematisiert              | Tools in eigene Arbeit einbinden aber auch modifizieren, muss aber genau das tun, was gebraucht wird und muss nachhaltig sein, bin ergebnisorientiert, Tool-Pool für allgemein gebräuchliche Werkzeuge Austausch, nicht immer die gleichen Sachen neu programmieren, in der TUSTEP-Community auch | Wunsch           | Kollaboration/Kooperation | \I4-6\        | <p>K 4.2a<br/>Anschließbarkeit und Kombinierbarkeit von Tools und Services, auch von selbstentwickelten – modulares Konzept und</p> <p>K 4.2b<br/>Anpassbarkeit von Tools an das jeweilige Projekt / die jeweiligen Gegenstände</p> <p><b>Tools und Services</b></p> |
| selbst thematisiert              | Tools, die trotz Standardisierung genau das tun, was gebraucht                                                                                                                                                                                                                                    | überzeugend      | Kollaboration/Kooperation | \I4-7\        | K 4.2b<br>Anpassbarkeit von Tools an das jeweilige Projekt / die                                                                                                                                                                                                     |

#### I4 Extraktion

|                                          |                                                                             |                                                |                                                           |               |                                                                                                                                                                   |
|------------------------------------------|-----------------------------------------------------------------------------|------------------------------------------------|-----------------------------------------------------------|---------------|-------------------------------------------------------------------------------------------------------------------------------------------------------------------|
|                                          | wird - auf dem schnellsten und direktesten Weg, nicht alles mögliche andere |                                                |                                                           |               | jeweiligen Gegenstände<br><b>Tools und Services</b>                                                                                                               |
| selbst thematisiert                      | Modularität bzgl. Formaten, Anpassbarkeit an jeweiliges Projekt             | Wunsch                                         | Produktion/Manipulation, Kollaboration/Kooperation        | \I4-10\       | K 4.3a<br>Anschließbarkeit/Nachnutzung von Ressourcen, Formate mappen<br><br>K 4.3b<br>erweiterbare/veränderbare Projekte/Objekte/Editionen<br><br><b>Inhalte</b> |
| selbst thematisiert                      | Gestaltung der Benutzeroberfläche möglich, verschiedene Zugriffsebenen      | gut                                            | Rezeption/Zugriff, Produktion/Manipulation, Bedienbarkeit | \I4-11\       | K 4.1a<br>Anpassung der Oberflächenkonfiguration<br><br><b>TextGrid-Oberfläche / Umgebung</b>                                                                     |
| <b>K 5<br/>Kollaboration/Kooperation</b> |                                                                             |                                                |                                                           |               |                                                                                                                                                                   |
| <i>Benennung</i>                         | <i>Beschreibung</i>                                                         | <i>Bewertung</i>                               | <i>Bezug</i>                                              | <i>Quelle</i> | <i>Reduktion</i>                                                                                                                                                  |
| selbst thematisiert                      | auf relativ einfache Weise TEI-konforme Sachen machen                       | Vorteil, positiv                               | Produktion/Manipulation, Bedienbarkeit                    | \I4-3\        | K 5.1d<br>Standards, TEI, Unabhängigkeit von Datenformaten<br><br><b>Austausch von Inhalten und Werkzeugen</b>                                                    |
| selbst thematisiert                      | Kooperation zwischen forschender,                                           | problematisch weil oft zeitlich und finanziell | Organisation/Verwaltung                                   | \I4-5\        | K 5.2b<br>Zusammenarbeit zwischen                                                                                                                                 |

#### I4 Extraktion

|                     |                                                                                                     |                               |                         |         |                                                                                                                                                                                       |
|---------------------|-----------------------------------------------------------------------------------------------------|-------------------------------|-------------------------|---------|---------------------------------------------------------------------------------------------------------------------------------------------------------------------------------------|
|                     | produzierender Institution und Serveranbieter                                                       | begrenzt                      |                         |         | Institutionen, Projekten, auch intern zwischen verschiedenen Stellen, mit Technikern, Workflow<br><br><b>Zusammenarbeit</b>                                                           |
| selbst thematisiert | Standardisierung, nicht x verschiedene Auszeichnungsformen in einen Topf werfen                     | Wichtig                       |                         | \I4-7\  | K 5.1d Standards, TEI, Unabhängigkeit von Datenformaten<br><br><b>Austausch von Inhalten und Werkzeugen</b>                                                                           |
| selbst thematisiert | Standards einhalten, diesbzgl. ist Überzeugungsarbeit zu leisten                                    | Wichtig                       |                         | \I4-10\ | K 5.1d Standards, TEI, Unabhängigkeit von Datenformaten<br><br><b>Austausch von Inhalten und Werkzeugen</b>                                                                           |
| selbst thematisiert | Zusammenarbeit an Daten von verschiedenen Arbeitsplätzen aus, Freigabemöglichkeiten für Bearbeitung | Wichtige Funktion             | Organisation/Verwaltung | \I4-12\ | K 5.2a Zusammenarbeit in Teams von verschiedenen Orten aus, auch an einem Dokument, verteilte Bearbeitung verschiedener ‚Schichten‘ eines Dokuments usw.<br><br><b>Zusammenarbeit</b> |
| selbst thematisiert | ortsunabhängiges Zusammenarbeiten                                                                   | Trend, entscheidender Vorteil | Produktion/Manipulation | \I4-16\ | K 5.2a Zusammenarbeit in Teams von                                                                                                                                                    |



#### I4 Extraktion

|                     |                                                                                  |                            |                           |         |                                                                                                                                                                                                                                                                                  |
|---------------------|----------------------------------------------------------------------------------|----------------------------|---------------------------|---------|----------------------------------------------------------------------------------------------------------------------------------------------------------------------------------------------------------------------------------------------------------------------------------|
|                     | über das Netz, weniger zeitlicher, administrativer und organisatorischer Aufwand |                            |                           |         | verschiedenen Orten aus, auch an einem Dokument, verteilte Bearbeitung verschiedener ‚Schichten‘ eines Dokuments usw.<br><br><b>Zusammenarbeit</b>                                                                                                                               |
| selbst thematisiert | digitales Wissen im Netz zur Verfügung stellen, Inhalte und Tools                | Trend                      | Modularität/Anpassbarkeit | \I4-16\ | K 5.1a<br>Austausch von Ressourcen, Nachnutzung und<br><br>K 5.1b<br>Austausch von Arbeits- bzw. Forschungsergebnissen, Bereitschaft dazu und<br><br>K 5.1c<br>Austausch von Arbeitsmitteln (Tools, Formaten, Skripten usw.)<br><br><b>Austausch von Inhalten und Werkzeugen</b> |
| selbst thematisiert | Zusammenarbeit an einem Dokument von verschiedenen Arbeitsplätzen aus            | wichtiges Potenzial der DH | Produktion/Manipulation   | \I4-17\ | K 5.2a<br>Zusammenarbeit in Teams von verschiedenen Orten aus, auch an einem Dokument, verteilte Bearbeitung verschiedener ‚Schichten‘ eines Dokuments usw.                                                                                                                      |

#### I4 Extraktion

|                                        |                                                                                                                                              |                               |                         |               | <b>Zusammenarbeit</b>                                                                                                                                                                                                                                                         |
|----------------------------------------|----------------------------------------------------------------------------------------------------------------------------------------------|-------------------------------|-------------------------|---------------|-------------------------------------------------------------------------------------------------------------------------------------------------------------------------------------------------------------------------------------------------------------------------------|
| selbst thematisiert                    | Verständigung auf Standards wichtig im Hinblick auf Inhalteaustausch- und -zugriff                                                           | wichtig                       | Rezeption/Zugriff       | \I4-21\       | <p>K 5.1a<br/>Austausch von Ressourcen, Nachnutzung und</p> <p>K 5.1b<br/>Austausch von Arbeits- bzw. Forschungsergebnissen, Bereitschaft dazu und</p> <p>K 5.1d<br/>Standards, TEI, Unabhängigkeit von Datenformaten</p> <p><b>Austausch von Inhalten und Werkzeugen</b></p> |
| <b>K 6<br/>Organisation/Verwaltung</b> |                                                                                                                                              |                               |                         |               |                                                                                                                                                                                                                                                                               |
| <i>Benennung</i>                       | <i>Beschreibung</i>                                                                                                                          | <i>Bewertung</i>              | <i>Bezug</i>            | <i>Quelle</i> | <i>Reduktion</i>                                                                                                                                                                                                                                                              |
| selbst thematisiert                    | Archivierung, Daten dauerhaft verfügbar halten, institutionalisierte Lösung, nicht nur Backup - auch einzelne abgeschlossene Arbeitsschritte | interessanter Effekt, wichtig | Produktion/Manipulation | \I4-5\        | <p>K 6.1b<br/>Datenspeicherung und –verwaltung, Langzeitarchivierung, verbunden mit Bearbeitungsmöglichkeiten und Nachnutzung und</p> <p>K 6.1c<br/>Adressierung, Zitierbarkeit,</p>                                                                                          |

#### I4 Extraktion

|                     |                                                                                                    |           |                         |         |                                                                                                                                                                                                     |
|---------------------|----------------------------------------------------------------------------------------------------|-----------|-------------------------|---------|-----------------------------------------------------------------------------------------------------------------------------------------------------------------------------------------------------|
|                     |                                                                                                    |           |                         |         | Urheberrecht,<br>Leistungsanerkennung<br><br><b>Organisation und<br/>Verwaltung von Inhalten</b>                                                                                                    |
| selbst thematisiert | Wege genau<br>beschreiben, wie man<br>Daten dahin und<br>wieder zurück<br>bekommt                  | Wichtig   | Produktion/Manipulation | \I4-10\ | K 6.1b<br>Datenspeicherung und<br>–verwaltung,<br>Langzeitarchivierung,<br>verbunden mit<br>Bearbeitungsmöglichkeiten<br>und Nachnutzung<br><br><b>Organisation und<br/>Verwaltung von Inhalten</b> |
| selbst thematisiert | in der<br>Bedienungsführung<br>klarmachen, ob und<br>wie Daten verändert<br>worden sind            | Wunsch    | Bedienbarkeit           | \I4-12\ | K 6.1a<br>Versionenverwaltung<br><br><b>Organisation und<br/>Verwaltung von Inhalten</b>                                                                                                            |
| selbst thematisiert | Wann welche Daten<br>wo abgelegt und<br>verändert werden,<br>lokal oder auf dem<br>TextGrid-Server | schwierig |                         | \I4-12\ | K 6.1a<br>Versionenverwaltung<br>und<br><br>K 6.1b<br>Datenspeicherung und<br>–verwaltung,<br>Langzeitarchivierung,<br>verbunden mit<br>Bearbeitungsmöglichkeiten<br>und Nachnutzung                |

#### I4 Extraktion

|                     |                                                                         |                  |                           |         |                                                                                                                                                                                                                           |
|---------------------|-------------------------------------------------------------------------|------------------|---------------------------|---------|---------------------------------------------------------------------------------------------------------------------------------------------------------------------------------------------------------------------------|
|                     |                                                                         |                  |                           |         | <b>Organisation und Verwaltung von Inhalten</b>                                                                                                                                                                           |
| selbst thematisiert | Offline Arbeit mit anschließendem Abgleich mit den Daten auf dem Server | Wichtiger Aspekt |                           | \I4-12\ | K 6.2b<br>Offline-Arbeit und spätere Synchronisierung<br><br><b>Organisation und Verwaltung von Arbeitsprozessen</b>                                                                                                      |
| selbst thematisiert | Vergabe von Rechten                                                     | Wichtiger Aspekt | Kollaboration/Kooperation | \I4-12\ | K 6.2a<br>Workflow-Organisation, Projekt-Verwaltung<br><br><b>Organisation und Verwaltung von Arbeitsprozessen</b>                                                                                                        |
| selbst thematisiert | Speicherplätze für veränderbares und für statisches Material            | Wunsch           |                           | \I4-17\ | K 6.1a<br>Versionenverwaltung und<br><br>K 6.1b<br>Datenspeicherung und –verwaltung, Langzeitarchivierung, verbunden mit Bearbeitungsmöglichkeiten und Nachnutzung<br><br><b>Organisation und Verwaltung von Inhalten</b> |

#### I4 Extraktion

|                     |                                                                                                                                                                   |                                                                                              |                           |         |                                                                                                                                  |
|---------------------|-------------------------------------------------------------------------------------------------------------------------------------------------------------------|----------------------------------------------------------------------------------------------|---------------------------|---------|----------------------------------------------------------------------------------------------------------------------------------|
| selbst thematisiert | Versionenverwaltung                                                                                                                                               | wichtig, unabdingbar für Zusammenarbeit, aufgrund der Textmenge möglicherweise problematisch | Kollaboration/Kooperation | \I4-18\ | K 6.1a<br>Versionenverwaltung<br><br><b>Organisation und Verwaltung von Inhalten</b>                                             |
| selbst thematisiert | Vorbehalte gegen Verfügbarmachung von Daten, Anerkennung der wiss. Leistung, Zitierbarkeit, neuer Begriff von Urheberrecht notwendig, Publikation kein Muss in TG | positiv in TG, aber künftig Herausforderung, wird man in Zukunft mit leben müssen            |                           | \I4-20\ | K 6.1c<br>Adressierung, Zitierbarkeit, Urheberrecht, Leistungsanerkennung<br><br><b>Organisation und Verwaltung von Inhalten</b> |
