# Supplementary material
Source: publisher site journal article supplement (https://www.degruyterbrill.com/publication/isbn/9783110463927/downloadAsset/9783110463927_Extraktionen_Reduktionen_fallbezogen.zip)
Supplement: Supplementary file 24 [file I5 Extraktion und Reduktion.pdf › fallbezogene Extraktionen und Reduktionen/I5 Extraktion und Reduktion.pdf]

## I5 Extraktion

| <b>TÄTIGKEITEN UND EDV-ERFAHRUNG</b>                       |                                                                                                                                                       |                                                        |                                |               |                                                                                                                                                                |
|------------------------------------------------------------|-------------------------------------------------------------------------------------------------------------------------------------------------------|--------------------------------------------------------|--------------------------------|---------------|----------------------------------------------------------------------------------------------------------------------------------------------------------------|
| <b>Tätigkeiten</b>                                         |                                                                                                                                                       |                                                        |                                |               |                                                                                                                                                                |
| <i>Gegenstände</i>                                         | <i>Methoden/Verfahren</i>                                                                                                                             | <i>Ziele/Fragen</i>                                    | <i>Institutioneller Rahmen</i> | <i>Quelle</i> |                                                                                                                                                                |
| digitale Editionen, Hybridausgabe, Dramen aus dem 19. Jhd. | Text erfassen, taggen, verlinken, XML-kodiert nach TEI                                                                                                | Präsentation bzw. Publikation online und als Buch      | Universität, Editionsprojekt   | \I5-1\        |                                                                                                                                                                |
| <b>Erfahrung</b>                                           |                                                                                                                                                       |                                                        |                                |               |                                                                                                                                                                |
|                                                            | <i>Beschreibung</i>                                                                                                                                   | <i>Bewertung</i>                                       |                                | <i>Quelle</i> |                                                                                                                                                                |
|                                                            | XML lesen und verstehen, auch DTD und XSL-Transformierung, muss nicht selbst kodieren, digital Texte erfassen, vertaggen, verlinken, kodiert nach TEI | erfahren in der Anwendung, nicht in der Programmierung |                                | \I5-1\        |                                                                                                                                                                |
|                                                            | eigenes Tool für die Texterfassung, sukzessiver Ausbau                                                                                                | komfortabler als XML-Editor                            | Produktion/Manipulation        | \I5-2\        |                                                                                                                                                                |
| <b>BEDARFSKATEGORIEN</b>                                   |                                                                                                                                                       |                                                        |                                |               |                                                                                                                                                                |
| <b>K 1 Bedienbarkeit</b>                                   |                                                                                                                                                       |                                                        |                                |               |                                                                                                                                                                |
| <i>Benennung</i>                                           | <i>Beschreibung</i>                                                                                                                                   | <i>Bewertung</i>                                       | <i>Bezug</i>                   | <i>Quelle</i> | <i>Reduktion</i>                                                                                                                                               |
| selbst thematisiert                                        | gegen die spitzen Klammern, mit dem XML-Editor keine Freude                                                                                           | negativ                                                | Produktion/Manipulation        | \I5-3\        | K 1.4b<br>Arbeiten wie in der „normalen“ Textverarbeitung ermöglichen, Vermeidung von spitzen Klammern, XML-Generierung im Hintergrund<br><br><b>XML / TEI</b> |
| selbst thematisiert                                        | unübersichtlich                                                                                                                                       | negativ                                                |                                | \I5-3\        | K 1.2c<br>Zurechtfinden, Komponenten und Sichten zuordnen ist am Anfang schwierig (evtl.                                                                       |

# I5 Extraktion

|                                  |                                                        |                                                                |                   |               |                                                                                                                                                                      |
|----------------------------------|--------------------------------------------------------|----------------------------------------------------------------|-------------------|---------------|----------------------------------------------------------------------------------------------------------------------------------------------------------------------|
|                                  |                                                        |                                                                |                   |               | gewohnte Website- und Ordnerstrukturierung besser)<br><br><b>Orientierung /<br/>Übersichtlichkeit /<br/>Oberflächengestaltung</b>                                    |
| vom Interviewer thematisiert     | allgemeine Bedienbarkeit/Erlernbarkeit                 | ok, relativ leicht zu erfassen, man braucht regelmäßige Praxis |                   | \I5-9\        | K 1.1d<br>mit mehr EDV-Erfahrung (z.B. mit Eclipse) schnell erlernbar und gut bedienbar<br><br><b>Benutzerführung /<br/>Erlernbarkeit</b>                            |
| vom Interviewer thematisiert     | Darstellung von Rechercheergebnissen als Seitenfenster | hat nicht gestört                                              | Rezeption/Zugriff | \I5-10\       | K 1.2a<br>Oberfläche ist übersichtlich, sachlich<br><br><b>Orientierung /<br/>Übersichtlichkeit /<br/>Oberflächengestaltung</b>                                      |
| selbst thematisiert              | digitales Lesen ist unkomfortabler                     | negativ                                                        | Rezeption/Zugriff | \I5-15\       | K 1.2b<br>Lesbarkeit/Sichtbarkeit am Bildschirm je nach Konfiguration nicht immer gut<br><br><b>Orientierung /<br/>Übersichtlichkeit /<br/>Oberflächengestaltung</b> |
| <b>K 2<br/>Rezeption/Zugriff</b> |                                                        |                                                                |                   |               |                                                                                                                                                                      |
| <i>Benennung</i>                 | <i>Beschreibung</i>                                    | <i>Bewertung</i>                                               | <i>Bezug</i>      | <i>Quelle</i> | <i>Reduktion</i>                                                                                                                                                     |

## I5 Extraktion

|                              |                                                                                                                                                                                                                                   |                    |                         |         |                                                                                                                                                                                                                                                                       |
|------------------------------|-----------------------------------------------------------------------------------------------------------------------------------------------------------------------------------------------------------------------------------|--------------------|-------------------------|---------|-----------------------------------------------------------------------------------------------------------------------------------------------------------------------------------------------------------------------------------------------------------------------|
| vom Interviewer thematisiert | Inhaltresearche hat oft keine Ergebnisse geliefert                                                                                                                                                                                | negativ im TG-Test | Bedienbarkeit           | \I5-10\ | K 2.1a<br>kostenloser Zugriff auf unterschiedliche Repositorien bzw. Ressourcen (z.B. Wörterbücher), Quellen und Ausgaben/ Editionen, Vergleichsmöglichkeiten mit anderen Projekten/ Quellen, orts- und rechnerunabhängiger Zugriff<br><br><b>Zugriff auf Inhalte</b> |
| selbst thematisiert          | Zugriff auf digitale Ressourcen, z.B. sämtliche Texte, die man braucht, auch unabhängig von der konkreten Objektform, vor allem schwer zugängliche Objekte, in einer gigantischen Bibliothek, aber als unabhängige Infrastruktur, | Wunsch             | Organisation/Verwaltung | \I5-11\ | K 2.1a<br>kostenloser Zugriff auf unterschiedliche Repositorien bzw. Ressourcen (z.B. Wörterbücher), Quellen und Ausgaben/ Editionen, Vergleichsmöglichkeiten mit anderen Projekten/ Quellen, orts- und rechnerunabhängiger Zugriff<br><br><b>Zugriff auf Inhalte</b> |
| vom Interviewer thematisiert | ordentliche Kataloge und freie Suche ergeben noch die beste Trefferquote, standardisierte Datenbankstrukturen, komplexe Ergebnisse übersichtlich präsentiert, Sortierung nach verschiedenen Kriterien,                            | Wunsch             |                         | \I5-12\ | K 2.2b<br>Leichte Zugänglichkeit, Übersicht durch Browser, Suchmasken, Ontologien, Klassifizierungen, Indizierungen, Strukturierungen<br><br><b>Zugriffsformen, Rezeptions-</b>                                                                                       |

## I5 Extraktion

|                                        |                                                                                                                  |                   |              |               |                                                                                                                                                                                                            |
|----------------------------------------|------------------------------------------------------------------------------------------------------------------|-------------------|--------------|---------------|------------------------------------------------------------------------------------------------------------------------------------------------------------------------------------------------------------|
|                                        |                                                                                                                  |                   |              |               | <b>und Recherchemöglichkeiten</b>                                                                                                                                                                          |
| selbst thematisiert                    | schneller Ergebnisse durch Suchfunktion                                                                          | Vorteil von DH    |              | \I5-13\       | K 2.2b<br>Leichte Zugänglichkeit, Übersicht durch Browser, Suchmasken, Ontologien, Klassifizierungen, Indizierungen, Strukturierungen<br><br><b>Zugriffsformen, Rezeptions- und Recherchemöglichkeiten</b> |
| selbst thematisiert                    | Open-Access-Idee in TG                                                                                           | positiv           |              | \I5-18\       | K 2.1c<br>nicht rein rezeptiver, sondern auch produktiver, „schreibender“ Zugriff, auch in der eigenen Forschungsumgebung, auch auf den Quellcode<br><br><b>Zugriff auf Inhalte</b>                        |
| <b>K 3<br/>Produktion/Manipulation</b> |                                                                                                                  |                   |              |               |                                                                                                                                                                                                            |
| <i>Benennung</i>                       | <i>Beschreibung</i>                                                                                              | <i>Bewertung</i>  | <i>Bezug</i> | <i>Quelle</i> | <i>Reduktion</i>                                                                                                                                                                                           |
| selbst thematisiert                    | nützliche Tools, die saubereres und schnelleres Arbeiten ermöglichen, schneller lemmatisieren und verlinken z.B. | Wunsch, Erwartung |              | \I5-2\        | K 3.4a<br>Arbeitsumgebung mit Tool-Angebot, nicht alles neu /selbst programmieren, kostenlos und<br>K 3.4b<br>Geschwindigkeit, Effizienz, Effektivität, Genauigkeit der Arbeit verbessern                  |

## I5 Extraktion

|                     |                                                                                  |                                                |                           |       |                                                                                                                                                                                                                                            |
|---------------------|----------------------------------------------------------------------------------|------------------------------------------------|---------------------------|-------|--------------------------------------------------------------------------------------------------------------------------------------------------------------------------------------------------------------------------------------------|
|                     |                                                                                  |                                                |                           |       | <b>Produktionsunterstützung<br/>allgemein</b>                                                                                                                                                                                              |
| selbst thematisiert | Lemmatisierer-Ergebnisse sollten z.B. mit dem Wörterbuch verbunden werden können | negativ in TG, wäre interessant für die Arbeit | Modularität/Anpassbarkeit | I5-3\ | K 3.2a<br>Verknüpfung von Tools, kreative Ansätze (z.B. Wörterbücher zur Kollationierung nutzen, Lemmatisierung mit Wörterbüchern verbinden), interdisziplinäre Ansätze<br><br><b>Analyse- und Visualisierungsmöglichkeiten</b>            |
| selbst thematisiert | Kommentareintrag/Referenz zu einem markierten Wort generieren                    | Wunsch                                         | Rezeption/Zugriff         | I5-4\ | K 3.3a<br>Verknüpfungsmöglichkeiten Text-Text (z.B. editionswiss. Kommentarfunktionen, Varianten verknüpfen, Apparat, Quellen/Referenzen, Register, Wörterbücher, Briefe)<br><br><b>Verknüpfungsmöglichkeiten und deren Visualisierung</b> |
| selbst thematisiert | Lemmatisierer-Funktion hat nicht funktioniert                                    | negativ beim TG-test                           |                           | I5-7\ | K 3.4a<br>Arbeitsumgebung mit Tool-Angebot, nicht alles neu /selbst programmieren, kostenlos<br><br><b>Produktionsunterstützung<br/>allgemein</b>                                                                                          |

## I5 Extraktion

|                     |                                                                                                                              |               |                   |        |                                                                                                                                                                                                                                                                                                                                                                                                                      |
|---------------------|------------------------------------------------------------------------------------------------------------------------------|---------------|-------------------|--------|----------------------------------------------------------------------------------------------------------------------------------------------------------------------------------------------------------------------------------------------------------------------------------------------------------------------------------------------------------------------------------------------------------------------|
| selbst thematisiert | digitale Technik verändert textphilologische Arbeitsprozesse als Werkzeug, keine Hypothesenbildung                           | hilfreich     |                   | I5-13\ | <p>K 3.1a<br/>eigener XML-Editor ist nicht die Stärke von TextGrid, andere sind besser, nicht der richtige Schwerpunkt</p> <p><b>XML-Produktion</b><br/>und<br/>K 3.4c<br/>Veränderung von Arbeitsprozessen durch digitale Technik (nicht bzgl. Hypothesenbildung, Erkenntnisse usw.), Aufbrechen von Medienkonventionen vs. Ausrichtung auf das Buch als Hürde</p> <p><b>Produktionsunterstützung allgemein</b></p> |
| selbst thematisiert | Medienkonventionen, Arbeitsprozesse allgemein noch stark auf das Medium Buch konzentriert, anderer Umgang mit Text in den DH | Nutzungshürde | Rezeption/Zugriff | I5-15\ |                                                                                                                                                                                                                                                                                                                                                                                                                      |
| selbst thematisiert | semantisches Netz, Heraus kriegen von Beziehungen, Grundlage für Überprüfung von Hypothesen                                  | Wunsch        | Rezeption/Zugriff | I5-17\ | <p>K 3.3b<br/>Visualisierung von Beziehungen (z. B. in Briefnetzen), Mustererkennung</p> <p><b>Verknüpfungsmöglichkeiten</b></p>                                                                                                                                                                                                                                                                                     |

## I5 Extraktion

|                                                               |                                                                                             |                    |                          |               |                                                                                                                                                          |
|---------------------------------------------------------------|---------------------------------------------------------------------------------------------|--------------------|--------------------------|---------------|----------------------------------------------------------------------------------------------------------------------------------------------------------|
|                                                               |                                                                                             |                    |                          |               | <b>und deren Visualisierung</b>                                                                                                                          |
| selbst thematisiert                                           | andere XML-Editoren können ganz klar mehr als der TG-XML-Editor                             | negativ im TG-Test |                          | \I5-18\       | K 3.1a<br>eigener XML-Editor ist nicht die Stärke von TextGrid, andere sind besser, nicht der richtige Schwerpunkt<br><br><b>XML-Produktion</b>          |
| <b>K 4</b><br><b>Modularität/Anpassbarkeit</b>                |                                                                                             |                    |                          |               |                                                                                                                                                          |
| <i>Benennung</i>                                              | <i>Beschreibung</i>                                                                         | <i>Bewertung</i>   | <i>Bezug</i>             | <i>Quelle</i> | <i>Reduktion</i>                                                                                                                                         |
| selbst thematisiert, Look & Feel vom Interviewer angesprochen | Konfiguration der Bearbeiteransicht                                                         | angenehm           | Produktion/Manipulation  | \I5-6\        | K 4.1a<br>Anpassung der Oberflächenkonfiguration<br><br><b>TextGrid-Oberfläche / Umgebung</b>                                                            |
| vom Interviewer thematisiert                                  | Tool einbinden, eigenes Texterfassungstool integrieren und TG zur Datenhaltung nutzen       | Wunsch             | Produktion/Manipulation, | \I5-8\        | K 4.2a<br>Anschließbarkeit und Kombinierbarkeit von Tools und Services, auch von selbstentwickelten – modulares Konzept<br><br><b>Tools und Services</b> |
| <b>K 5</b><br><b>Kollaboration/Kooperation</b>                |                                                                                             |                    |                          |               |                                                                                                                                                          |
| <i>Benennung</i>                                              | <i>Beschreibung</i>                                                                         | <i>Bewertung</i>   | <i>Bezug</i>             | <i>Quelle</i> |                                                                                                                                                          |
| vom Interviewer thematisiert                                  | DH erleichtert Organisation kollaborativen Arbeitens, bessere, transparentere Infrastruktur | positiv, Potenzial | Organisation/Verwaltung  | \I5-14\       | K 5.2a<br>Zusammenarbeit in Teams von verschiedenen Orten aus, auch an einem Dokument, verteilte                                                         |

## I5 Extraktion

|                     |                                                                                 |               |                         |         |                                                                                                                                                                                                        |
|---------------------|---------------------------------------------------------------------------------|---------------|-------------------------|---------|--------------------------------------------------------------------------------------------------------------------------------------------------------------------------------------------------------|
|                     |                                                                                 |               |                         |         | <p>Bearbeitung verschiedener ‚Schichten‘ eines Dokuments usw.</p> <p><b>Zusammenarbeit</b></p>                                                                                                         |
| selbst thematisiert | Bereitschaft, Daten herzugeben/öffentlich zu machen vs. Konkurrenzgedanke       | problematisch | Organisation/Verwaltung | \I5-14\ | <p>K 5.1a<br/>Austausch von Ressourcen, Nachnutzung und</p> <p>K 5.1b<br/>Austausch von Arbeits- bzw. Forschungsergebnissen, Bereitschaft dazu</p> <p><b>Austausch von Inhalten und Werkzeugen</b></p> |
| selbst thematisiert | Standards, standardisierte Werkzeuge, Baseline-Tagging für bestimmte Textsorten | sinnvoll      | Produktion/Manipulation | \I5-16\ | <p>K 5.1d<br/>Standards, TEI, Unabhängigkeit von Datenformaten</p> <p><b>Austausch von Inhalten und Werkzeugen</b></p>                                                                                 |
| selbst thematisiert | philologische Standards lassen sich schwer etablieren                           | problematisch | Produktion/Manipulation | \I5-16\ | <p>K 5.1c<br/>Austausch von Arbeitsmitteln (Tools, Formaten, Skripten usw.)</p> <p><b>Austausch von Inhalten und Werkzeugen</b></p>                                                                    |
| selbst thematisiert | internationale Standards für                                                    | Wunsch,       | Rezeption/Zugriff,      | \I5-17\ | K 5.1d                                                                                                                                                                                                 |



# I5 Extraktion

|                                        |                                                                              |                        |                           |               |                                                                                                                               |
|----------------------------------------|------------------------------------------------------------------------------|------------------------|---------------------------|---------------|-------------------------------------------------------------------------------------------------------------------------------|
|                                        | semantische Auszeichnung,<br>Voraussetzung für<br>semantischen Zugriff       | Herausforderung        | Produktion/Manipulation   |               | Standards, TEI,<br>Unabhängigkeit von<br>Datenformaten<br><br><b>Austausch von Inhalten und<br/>Werkzeugen</b>                |
| <b>K 6<br/>Organisation/Verwaltung</b> |                                                                              |                        |                           |               |                                                                                                                               |
| <i>Benennung</i>                       | <i>Beschreibung</i>                                                          | <i>Bewertung</i>       | <i>Bezug</i>              | <i>Quelle</i> | <i>Reduktion</i>                                                                                                              |
| selbst thematisiert                    | Nutzerverwaltung in großen<br>Projekten mit vielen<br>Beteiligten            | interessant,<br>Wunsch | Kollaboration/Kooperation | I5-5\         | K 6.2a<br>Workflow-Organisation,<br>Projekt-Verwaltung<br><br><b>Organisation und<br/>Verwaltung von<br/>Arbeitsprozessen</b> |
| selbst thematisiert                    | Versionierung                                                                | interessant,<br>Wunsch | Kollaboration/Kooperation | I5-5\         | K 6.1a<br>Versionenverwaltung<br><br><b>Organisation und<br/>Verwaltung von Inhalten</b>                                      |
| selbst thematisiert                    | Beobachtungsrolle im<br>Projekt des Kollegen hat<br>nicht funktioniert       | negativ beim Test      | Kollaboration/Kooperation | I5-7\         | K 6.2a<br>Workflow-Organisation,<br>Projekt-Verwaltung<br><br><b>Organisation und<br/>Verwaltung von<br/>Arbeitsprozessen</b> |
| selbst thematisiert                    | Datenhaltung im Grid,<br>Daten/Ergebnisse im Grid<br>ablegen, die man vorher | sinnvoll               | Produktion/Manipulation   | I5-8\         | K 6.1b<br>Datenspeicherung und<br>-verwaltung,                                                                                |

## I5 Extraktion

|                     |                                                                                                          |        |  |        |                                                                                                                                                                                                                                                                                                                       |
|---------------------|----------------------------------------------------------------------------------------------------------|--------|--|--------|-----------------------------------------------------------------------------------------------------------------------------------------------------------------------------------------------------------------------------------------------------------------------------------------------------------------------|
|                     | selbst extern produziert hat                                                                             |        |  |        | <p>Langzeitarchivierung, verbunden mit Bearbeitungsmöglichkeiten und Nachnutzung</p> <p><b>Organisation und Verwaltung von Inhalten</b></p> <p>K 6.2b<br/>Offline-Arbeit und spätere Synchronisierung</p> <p><b>Organisation und Verwaltung von Arbeitsprozessen</b></p>                                              |
| selbst thematisiert | Unterbringung eigener digitaler Produkte in einer gigantischen Bibliothek als unabhängiger Infrastruktur | Wunsch |  | I5-11\ | <p>K 6.1b<br/>Datenspeicherung und –verwaltung, Langzeitarchivierung, verbunden mit Bearbeitungsmöglichkeiten und Nachnutzung</p> <p><b>Organisation und Verwaltung von Inhalten</b></p> <p>K 6.2b<br/>Offline-Arbeit und spätere Synchronisierung</p> <p><b>Organisation und Verwaltung von Arbeitsprozessen</b></p> |
