# Supplementary material
Source: publisher site journal article supplement (https://www.degruyterbrill.com/publication/isbn/9783110463927/downloadAsset/9783110463927_Extraktionen_Reduktionen_fallbezogen.zip)
Supplement: Supplementary file 25 [file I6 Extraktion und Reduktion.pdf › fallbezogene Extraktionen und Reduktionen/I6 Extraktion und Reduktion.pdf]

# I6 Extraktion

| <b>TÄTIGKEITEN UND EDV-ERFAHRUNG</b>                                                                                                                                 |                                                                                                                                   |                                                                                                                                                                                                    |                                               |               |  |
|----------------------------------------------------------------------------------------------------------------------------------------------------------------------|-----------------------------------------------------------------------------------------------------------------------------------|----------------------------------------------------------------------------------------------------------------------------------------------------------------------------------------------------|-----------------------------------------------|---------------|--|
| <b>Tätigkeiten</b>                                                                                                                                                   |                                                                                                                                   |                                                                                                                                                                                                    |                                               |               |  |
| <i>Gegenstände</i>                                                                                                                                                   | <i>Methoden/Verfahren</i>                                                                                                         | <i>Ziele/Fragen</i>                                                                                                                                                                                | <i>Institutioneller Rahmen</i>                | <i>Quelle</i> |  |
| Editionsprojekte, Briefwechsel, historisch-kritische Ausgabe, textgenetische Edition, "nicht ganz glückliche Transkriptionsweise", verschiedene diakritische Zeichen | editionsphilologische Methoden und Verfahren, elektronisch bisher umgesetzt mit Word                                              | Darstellung der "nicht ganz glücklichen Transkriptionsweise" an der Textoberfläche bzw. des Layouts mit Word, zielt auf eine Print-Publikation bzw. eine nicht-hypertextuelle digitale Darstellung | Universität, Forschungs- bzw. Editionsprojekt | \I6-1\        |  |
| digitale Edition                                                                                                                                                     | Minimalauszeichnung mit HTML: Absätze, Kursivierung, Sperrung, Zitateinschub                                                      | Umstellung auf XML ohne Behelligen von Philologen mit technischen Belangen                                                                                                                         | Universität, Forschungs- bzw. Editionsprojekt | \I6-2\        |  |
| Positionierung von Grußfloskeln in der Edition, Kodierung von Überlappungen                                                                                          | mimetisch gelöst, ansonsten "Kompromissausgabe" (normiert durch Blocksatz)                                                        | Problem der räumlichen Positionierung von Grußfloskeln, Überlappungen als Herausforderung                                                                                                          | Universität, Forschungs- bzw. Editionsprojekt | \I6-3\        |  |
| digitale Edition                                                                                                                                                     | Weniger eigene Produktion als zuvor mit Word, XML-Auszeichnung hauptsächlich durch Mitarbeiter, editorische Entscheidungen selbst | Selbst edieren mit XML, sehen, was produziert wird                                                                                                                                                 | Universität, Forschungs- bzw. Editionsprojekt | \I6-4\        |  |
| <b>Erfahrung</b>                                                                                                                                                     |                                                                                                                                   |                                                                                                                                                                                                    |                                               |               |  |
|                                                                                                                                                                      | <i>Beschreibung</i>                                                                                                               | <i>Bewertung</i>                                                                                                                                                                                   |                                               | <i>Quelle</i> |  |
|                                                                                                                                                                      | Erfahrung in EDV-gestützter Edition mit Word, Umstellung auf XML seit zwei Jahren                                                 | nicht einfach, externe Hilfe in Form von DTDs                                                                                                                                                      |                                               | \I6-1\        |  |
|                                                                                                                                                                      | mit HTML gearbeitet, Dokumentvorlagen mit                                                                                         | selbst aber praktisch nicht viel gemacht,                                                                                                                                                          |                                               | \I6-2\        |  |

# I6 Extraktion

|                          |                                                                                                                                                                                                                                                                                                                              |                                                                                                                                                                                                                                          |                           |               |                                                                                                        |
|--------------------------|------------------------------------------------------------------------------------------------------------------------------------------------------------------------------------------------------------------------------------------------------------------------------------------------------------------------------|------------------------------------------------------------------------------------------------------------------------------------------------------------------------------------------------------------------------------------------|---------------------------|---------------|--------------------------------------------------------------------------------------------------------|
|                          | Makros definiert, Umstellung auf XML                                                                                                                                                                                                                                                                                         | externe Hilfe in Form von XML-Editor-Texttypen für Philologen, Distanzierung von der Position, keine Spitzklammern sehen zu wollen                                                                                                       |                           |               |                                                                                                        |
|                          | Hauptsächlich mit Fachwissenschaftlichem, weniger mit Technischem befasst (editorische Entscheidungen, im Dialog mit Mitarbeitern bzgl. der Kodierung); dennoch immer wieder mit Technischem beschäftigt ("Niederungen", "konkrete Realität"), Nutzung von Spy, Umstellung auf Oxygen, Kodierung übernehmen v.a. Mitarbeiter | Es ist sehr schwer, auf dem Laufenden zu bleiben, den Wissensstand zu halten. Anfangs gemeinsamer Wissenstand und Diskussion mit eignen Mitarbeitern, jetzt Wissensdefizit gegenüber den eigenen Mitarbeitern bzgl. technischer Belange. |                           | \I6-3\        |                                                                                                        |
|                          | Benutzung XML-Editor                                                                                                                                                                                                                                                                                                         | zu wenig Zeit, neue Erfahrung, Problem                                                                                                                                                                                                   |                           | \I6-4\        |                                                                                                        |
|                          | Nutzung von Subversion, Versionierung                                                                                                                                                                                                                                                                                        | Fülle von Fragen, Austausch erforderlich                                                                                                                                                                                                 |                           | \I6-12\       |                                                                                                        |
| <b>BEDARFSKATEGORIEN</b> |                                                                                                                                                                                                                                                                                                                              |                                                                                                                                                                                                                                          |                           |               |                                                                                                        |
| <b>K 1</b>               |                                                                                                                                                                                                                                                                                                                              |                                                                                                                                                                                                                                          |                           |               |                                                                                                        |
| <b>Bedienbarkeit</b>     |                                                                                                                                                                                                                                                                                                                              |                                                                                                                                                                                                                                          |                           |               |                                                                                                        |
| <i>Benennung</i>         | <i>Beschreibung</i>                                                                                                                                                                                                                                                                                                          | <i>Bewertung</i>                                                                                                                                                                                                                         | <i>Bezug</i>              | <i>Quelle</i> | <i>Reduktion</i>                                                                                       |
| selbst thematisiert      | Umstellung auf XML                                                                                                                                                                                                                                                                                                           | nicht einfach                                                                                                                                                                                                                            | Produktion, Kollaboration | \I6-1\        | K 1.4a<br>XML/TEI ist eine Hürde, Unterstützung durch das System ist notwendig, Heranführen/Hilfemenu, |

## I6 Extraktion

|                                                                                                 |                                                                                                              |                                                                    |                           |        |                                                                                                                                                                                                                                                                                              |
|-------------------------------------------------------------------------------------------------|--------------------------------------------------------------------------------------------------------------|--------------------------------------------------------------------|---------------------------|--------|----------------------------------------------------------------------------------------------------------------------------------------------------------------------------------------------------------------------------------------------------------------------------------------------|
|                                                                                                 |                                                                                                              |                                                                    |                           |        | <p>Reduzierung der Schwelle, aber keine Vermeidung von spitzen Klammern, Komplexität abbilden, fachliche Mehrwerte vermitteln</p> <p><b>Bedienbarkeit der Auszeichnungsebene</b></p>                                                                                                         |
| selbst thematisiert                                                                             | möglichst geringe Behelligung der Philologen mit technischen Belangen, Diskurs um spitze Klammern            | Distanzierung von der Ansicht, keine Spitzklammern sehen zu wollen | Kollaboration/Kooperation | \I6-2\ | <p>K 1.4a<br/>XML/TEI ist eine Hürde, Unterstützung durch das System ist notwendig, Heranführen/Hilfemenu, Reduzierung der Schwelle, aber keine Vermeidung von spitzen Klammern, Komplexität abbilden, fachliche Mehrwerte vermitteln</p> <p><b>Bedienbarkeit der Auszeichnungsebene</b></p> |
| selbst thematisiert<br>(die Problematisierung, vom Interviewer nach XML-Editor-Nutzung gefragt) | neue Erfahrung, Wand zwischen mir und dem Objekt, früher mit Word unmittelbare Sichtbarkeit des Produzierten | früher mit Word weniger schwierig,                                 | Produktion/Manipulation   | \I6-4\ | <p>K 1.4b<br/>Arbeiten wie in der „normalen“ Textverarbeitung ermöglichen, Vermeidung von spitzen Klammern, XML-Generierung im Hintergrund</p> <p><b>Bedienbarkeit der</b></p>                                                                                                               |

# I6 Extraktion

|                     |                                                                                                                      |                                                                                                                                                                                                                                                                            |                                                    |         | <b>Auszeichnungsebene<br/>(Widerspruch?)</b>                                                                                                                                                                                                                                         |
|---------------------|----------------------------------------------------------------------------------------------------------------------|----------------------------------------------------------------------------------------------------------------------------------------------------------------------------------------------------------------------------------------------------------------------------|----------------------------------------------------|---------|--------------------------------------------------------------------------------------------------------------------------------------------------------------------------------------------------------------------------------------------------------------------------------------|
| selbst thematisiert | Erwartung des Abbaus der Nutzungs-Barriere, Erwartung, dass der Nutzer gefordert und an das Objekt herangeführt wird | enttäuscht vom TextGrid-Workshop, weil die Benutzungs-Barriere nicht abgebaut wurde bzw. zu wenig tiefgreifend daran gearbeitet wurde, der Nutzer zu wenig gefordert und an das Objekt herangeführt wurde, positiver Aspekt: Darstellung, was TextGrid künftig bieten soll |                                                    | \I6-5\  | K 1.4a<br>XML/TEI ist eine Hürde, Unterstützung durch das System ist notwendig, Heranführen/Hilfemenu, Reduzierung der Schwelle, aber keine Vermeidung von spitzen Klammern, Komplexität abbilden, fachliche Mehrwerte vermitteln<br><br><b>Bedienbarkeit der Auszeichnungsebene</b> |
| selbst thematisiert | Bedarf an Reduzierung der Schwelle zur XML-Benutzung, XML-Schema für die eigenen Bedürfnisse per Klick               | große Bedeutung, vom TextGrid-Workshop diesbezüglich enttäuscht                                                                                                                                                                                                            | Kollaboration/Kooperation, Produktion/Manipulation | \I6-14\ | K 1.4a<br>XML/TEI ist eine Hürde, Unterstützung durch das System ist notwendig, Heranführen/Hilfemenu, Reduzierung der Schwelle, aber keine Vermeidung von spitzen Klammern, Komplexität abbilden, fachliche Mehrwerte vermitteln<br><br><b>Bedienbarkeit der Auszeichnungsebene</b> |
| selbst thematisiert | fachwissenschaftliche Anleitung zur XML-Auszeichnung in                                                              | wichtiger Punkt, aber keine Angst vor spitzen Klammern (auch die                                                                                                                                                                                                           | Produktion/Manipulation, Kollaboration/Kooperation | \I6-15\ | K 1.4a<br>XML/TEI ist eine Hürde, Unterstützung durch das                                                                                                                                                                                                                            |

## I6 Extraktion

|                                                                                                                 |                                                                                    |                                                                                                                                                                                                                        |              |               |                                                                                                                                                                                                                                                                       |
|-----------------------------------------------------------------------------------------------------------------|------------------------------------------------------------------------------------|------------------------------------------------------------------------------------------------------------------------------------------------------------------------------------------------------------------------|--------------|---------------|-----------------------------------------------------------------------------------------------------------------------------------------------------------------------------------------------------------------------------------------------------------------------|
|                                                                                                                 | unterschiedlicher Tiefe und nach unterschiedlichen Parametern                      | Studenten nicht)                                                                                                                                                                                                       |              |               | System ist notwendig, Heranführen/Hilfemenu, Reduzierung der Schwelle, aber keine Vermeidung von spitzen Klammern, Komplexität abbilden, fachliche Mehrwerte vermitteln<br><br><b>Bedienbarkeit der Auszeichnungsebene</b>                                            |
| <b>K 2</b>                                                                                                      |                                                                                    |                                                                                                                                                                                                                        |              |               |                                                                                                                                                                                                                                                                       |
| <b>Rezeption/Zugriff</b>                                                                                        |                                                                                    |                                                                                                                                                                                                                        |              |               |                                                                                                                                                                                                                                                                       |
| <i>Benennung</i>                                                                                                | <i>Beschreibung</i>                                                                | <i>Bewertung</i>                                                                                                                                                                                                       | <i>Bezug</i> | <i>Quelle</i> | <i>Reduktion</i>                                                                                                                                                                                                                                                      |
| selbst thematisiert                                                                                             | Zugriff auf Wörterbuchnetz (als Beispiel)                                          | überwiegend positiv (im Hinblick auf die angebotenen Funktionen), skeptische Note im Hinblick auf das "Kosten-Nutzen-Verhältnis", kritische Frage nach dem Mehrwert im Vergleich zu selbst vorgemerkten Internetseiten |              | \I6-6\        | K 2.1a<br>kostenloser Zugriff auf unterschiedliche Repositorien bzw. Ressourcen (z.B. Wörterbücher), Quellen und Ausgaben/ Editionen, Vergleichsmöglichkeiten mit anderen Projekten/ Quellen, orts- und rechnerunabhängiger Zugriff<br><br><b>Zugriff auf Inhalte</b> |
| teils thematisiert durch den Interviewer (Umgang mit großen Datenmengen), teils selbst (digitale Verfügbarkeit, | Untersuchung großer Datenmengen, Volltextrecherche, Nutzen digitaler Verfügbarkeit | Bewertung als Nutzen, zugleich Anschlussfragen nach weiterem Nutzen                                                                                                                                                    |              | \I6-8\        | K 2.1a<br>kostenloser Zugriff auf unterschiedliche Repositorien bzw. Ressourcen (z.B.                                                                                                                                                                                 |

# I6 Extraktion

|                                        |                                                                                                                                                                       |                                                               |                           |               |                                                                                                                                                                                                                                                                                                                                                |
|----------------------------------------|-----------------------------------------------------------------------------------------------------------------------------------------------------------------------|---------------------------------------------------------------|---------------------------|---------------|------------------------------------------------------------------------------------------------------------------------------------------------------------------------------------------------------------------------------------------------------------------------------------------------------------------------------------------------|
| Volltextrecherche)                     |                                                                                                                                                                       |                                                               |                           |               | Wörterbücher), Quellen und Ausgaben/ Editionen, Vergleichsmöglichkeiten mit anderen Projekten/ Quellen, orts- und rechnerunabhängiger Zugriff<br><br><b>Zugriff auf Inhalte</b>                                                                                                                                                                |
| <b>K 3<br/>Produktion/Manipulation</b> |                                                                                                                                                                       |                                                               |                           |               |                                                                                                                                                                                                                                                                                                                                                |
| <i>Benennung</i>                       | <i>Beschreibung</i>                                                                                                                                                   | <i>Bewertung</i>                                              | <i>Bezug</i>              | <i>Quelle</i> |                                                                                                                                                                                                                                                                                                                                                |
| selbst thematisiert                    | TextGrid als Serviceeinrichtung mit den Funktionen: Texte in einer akzeptablen Form digital herstellen, allgemein zur Verfügung stellen, eine Art Grundlagenforschung | kommt als wissenschaftliche Erkenntnis bzw. Leistung in Frage | Organisation/Verwaltung   | \I6-9\        | K 3.1b<br>XML-Auszeichnungs- bzw. Produktionshilfe, Tools zur digitalen Herstellung und Verfügbarmachung von Texten, XML-Schemata vorgefertigt für verschiedene individuelle Bedürfnisse, Konvertierung in XML/TEI, Baseline Encoding, Streaming Editor, Unterstützung bei zunächst geringerer Auszeichnungstiefe<br><br><b>XML-Produktion</b> |
| selbst thematisiert                    | XML-Editor zu wenig komplex                                                                                                                                           | negativ (allerdings aus zweiter Hand), Anpassbarkeit wäre     | Modularität/Anpassbarkeit | \I6-13\       | K 3.1a<br>eigener XML-Editor ist nicht die Stärke von                                                                                                                                                                                                                                                                                          |

# I6 Extraktion

|                     |                                                                                                        |                                                               |                                          |         |                                                                                                                                                                                                                                                                                                                                                |
|---------------------|--------------------------------------------------------------------------------------------------------|---------------------------------------------------------------|------------------------------------------|---------|------------------------------------------------------------------------------------------------------------------------------------------------------------------------------------------------------------------------------------------------------------------------------------------------------------------------------------------------|
|                     |                                                                                                        | wichtig                                                       |                                          |         | TextGrid, andere sind besser, nicht der richtige Schwerpunkt<br><br><b>XML-Produktion</b>                                                                                                                                                                                                                                                      |
| selbst thematisiert | Umstellung von Word auf XML-Editor, Texterfassung, XML-Schema für meine Bedürfnisse per Klick (Vision) | problematisch                                                 | Modularität/Anpassbarkeit, Bedienbarkeit | \I6-14\ | K 3.1b<br>XML-Auszeichnungs- bzw. Produktionshilfe, Tools zur digitalen Herstellung und Verfügbarmachung von Texten, XML-Schemata vorgefertigt für verschiedene individuelle Bedürfnisse, Konvertierung in XML/TEI, Baseline Encoding, Streaming Editor, Unterstützung bei zunächst geringerer Auszeichnungstiefe<br><br><b>XML-Produktion</b> |
| selbst thematisiert | Auszeichnung durch Fachwissenschaftler, Bedarf einer Produktionshilfe                                  | Produktionshilfe für Fachwissenschaftler als wichtiger Bedarf | Bedienbarkeit,                           | \I6-15\ | K 3.1b<br>XML-Auszeichnungs- bzw. Produktionshilfe, Tools zur digitalen Herstellung und Verfügbarmachung von Texten, XML-Schemata vorgefertigt für verschiedene individuelle Bedürfnisse,                                                                                                                                                      |

# I6 Extraktion

|                                                                                                 |                                                                                                                                                                                                                                     |                                   |                                                    |               |                                                                                                                                                               |
|-------------------------------------------------------------------------------------------------|-------------------------------------------------------------------------------------------------------------------------------------------------------------------------------------------------------------------------------------|-----------------------------------|----------------------------------------------------|---------------|---------------------------------------------------------------------------------------------------------------------------------------------------------------|
|                                                                                                 |                                                                                                                                                                                                                                     |                                   |                                                    |               | Konvertierung in XML/TEI, Baseline Encoding, Streaming Editor, Unterstützung bei zunächst geringerer Auszeichnungstiefe<br><br><b>XML-Produktion</b>          |
| <b>K 4</b><br><b>Modularität/Anpassbarkeit</b>                                                  |                                                                                                                                                                                                                                     |                                   |                                                    |               |                                                                                                                                                               |
| <i>Benennung</i>                                                                                | <i>Beschreibung</i>                                                                                                                                                                                                                 | <i>Bewertung</i>                  | <i>Bezug</i>                                       | <i>Quelle</i> | <i>Reduktion</i>                                                                                                                                              |
| selbst thematisiert (konkreten Aspekt), Frage nach Individualisierbarkeit durch den Interviewer | Gefahr der Einschränkung der Individualisierbarkeit zugunsten eines gemeinsamen Nenners, Spagat zwischen Standardisierung/Normierung und Individualisierbarkeit, konkreter Anknüpfungspunkt: TextGrid-XML-Editor (zu wenig komplex) | kein einfaches Problem, schwierig | Produktion/Manipulation, Kollaboration/Kooperation | \I6-13\       | K 4.2b<br>Anpassbarkeit von Tools an das jeweilige Projekt / die jeweiligen Gegenstände<br><br><b>Tools und Services</b>                                      |
| <b>K 5</b><br><b>Kollaboration/Kooperation</b>                                                  |                                                                                                                                                                                                                                     |                                   |                                                    |               |                                                                                                                                                               |
| <i>Benennung</i>                                                                                | <i>Beschreibung</i>                                                                                                                                                                                                                 | <i>Bewertung</i>                  | <i>Bezug</i>                                       | <i>Quelle</i> | <i>Reduktion</i>                                                                                                                                              |
| selbst thematisiert                                                                             | Kooperation, institutionsexterner Partner schreibt DTDs                                                                                                                                                                             |                                   |                                                    | \I6-1\        | K 5.2b<br>Zusammenarbeit zwischen Institutionen, Projekten, auch intern zwischen verschiedenen Stellen, mit Technikern, Workflow<br><br><b>Zusammenarbeit</b> |



## I6 Extraktion

|                     |                                                                                                                                                                      |                                                                                                                                |                                            |        |                                                                                                                                                                                                                                                                          |
|---------------------|----------------------------------------------------------------------------------------------------------------------------------------------------------------------|--------------------------------------------------------------------------------------------------------------------------------|--------------------------------------------|--------|--------------------------------------------------------------------------------------------------------------------------------------------------------------------------------------------------------------------------------------------------------------------------|
| selbst thematisiert | institutionsexterner Partner entwickelt XML-Editor mit TEI-konformen Schemata für bestimmte Texttypen                                                                | Annahme: Partner hat das "erfolgreich für den Texttyp Drama gemacht"                                                           | Bedienbarkeit                              | \I6-2\ | K 5.2b<br>Zusammenarbeit zwischen Institutionen, Projekten, auch intern zwischen verschiedenen Stellen, mit Technikern, Workflow<br><br><b>Zusammenarbeit</b>                                                                                                            |
| selbst thematisiert | Kooperation bzw. Kollaboration mit Mitarbeitern, die bei der technischen Umsetzung (XML-Kodierung) editorischer Entscheidungen Mitarbeiten, DTD von externem Partner | Wissensdefizit zu Mitarbeitern ist kein Problem, solange sie das Technische im Griff haben.                                    |                                            | \I6-3\ | K 5.2b<br>Zusammenarbeit zwischen Institutionen, Projekten, auch intern zwischen verschiedenen Stellen, mit Technikern, Workflow<br><br><b>Zusammenarbeit</b>                                                                                                            |
| selbst thematisiert | TextGrid als Geben und Nehmen: Service bekommen, dafür eigene Arbeit veröffentlichen (auch Open Source Aspekt)                                                       | Fortschritt für die Scientific Community, Bezug zur Erlangung neuer wissenschaftlicher Erkenntnisse, Veränderung der Forschung | Rezeption/Zugriff, Organisation/Verwaltung | \I6-7\ | K 5.1a<br>Austausch von Ressourcen, Nachnutzung und<br>K 5.1b<br>Austausch von Arbeits- bzw. Forschungsergebnissen, Bereitschaft dazu und<br>K 5.1c<br>Austausch von Arbeitsmitteln (Tools, Formaten, Skripten usw.)<br><br><b>Austausch von Inhalten und Werkzeugen</b> |

## I6 Extraktion

|                              |                                                                                                                                                             |                                                                                                                                                        |                                                  |         |                                                                                                                                                                                          |
|------------------------------|-------------------------------------------------------------------------------------------------------------------------------------------------------------|--------------------------------------------------------------------------------------------------------------------------------------------------------|--------------------------------------------------|---------|------------------------------------------------------------------------------------------------------------------------------------------------------------------------------------------|
|                              |                                                                                                                                                             |                                                                                                                                                        |                                                  |         |                                                                                                                                                                                          |
| selbst thematisiert          | Standardisierung (TEI-Normen)                                                                                                                               | kommt als wissenschaftliche Erkenntnis bzw. Leistung in Frage                                                                                          | Organisation/Verwaltung                          | \I6-9\  | K 5.1d<br>Standards, TEI, Unabhängigkeit von Datenformaten<br><br><b>Austausch von Inhalten und Werkzeugen</b>                                                                           |
| vom Interviewer thematisiert | Austausch zu Problemstellungen, bezogen auf den "praktischen Herstellungsbereich"                                                                           | positive Bewertung eines Instruments, das den Austausch fördert, bisher Mangel an Austausch, jeder erfindet das Rad neu, man weiß zu wenig voneinander | Produktion/Manipulation                          | \I6-10\ | K 5.1c<br>Austausch von Arbeitsmitteln (Tools, Formaten, Skripten usw.)                                                                                                                  |
| vom Interviewer thematisiert | dezentrale Zusammenarbeit an einem Projekt (auch projektübergreifend), kooperativer Datenaustausch                                                          | Anerkennung des Nutzens digitaler Infrastrukturen bzw. z.B. der Organisationsfunktionen von TextGrid                                                   | Organisation/Verwaltung                          | \I6-11\ | K 5.2a<br>Zusammenarbeit in Teams von verschiedenen Orten aus, auch an einem Dokument, verteilte Bearbeitung verschiedener ‚Schichten‘ eines Dokuments usw.<br><br><b>Zusammenarbeit</b> |
| selbst thematisiert          | Kooperation bzgl. des Aufbaus eines Versionierungs- und Dateiverwaltungssystems, ausgehend von konkreten Problemstellungen, Ansatz für TextGrid: Wie könnte |                                                                                                                                                        | Organisation/Verwaltung, Produktion/Manipulation | \I6-12\ | K 5.2a<br>Zusammenarbeit in Teams von verschiedenen Orten aus, auch an einem Dokument, verteilte Bearbeitung verschiedener ‚Schichten‘ eines                                             |

## I6 Extraktion

|                                        |                                                                                                       |                                                    |                                                    |               |                                                                                                                                                               |
|----------------------------------------|-------------------------------------------------------------------------------------------------------|----------------------------------------------------|----------------------------------------------------|---------------|---------------------------------------------------------------------------------------------------------------------------------------------------------------|
|                                        | TextGrid Unterstützung leisten im Hinblick auf konkrete praktische Probleme                           |                                                    |                                                    |               | Dokuments usw.<br><b>Zusammenarbeit</b>                                                                                                                       |
| selbst thematisiert                    | Standardisierung durch XML(-Editor)                                                                   | positiv                                            | Modularität/Anpassbarkeit, Produktion/Manipulation | \I6-13\       | K 5.1d<br>Standards, TEI, Unabhängigkeit von Datenformaten<br><br><b>Austausch von Inhalten und Werkzeugen</b>                                                |
| selbst thematisiert                    | Abhängigkeit des Philologen von Technikern (zeitgleich, nicht wie früher versetzt - Abgabe an Setzer) | Abhängigkeit als Problem                           | Produktion/Manipulation, Bedienbarkeit             | \I6-14\       | K 5.2b<br>Zusammenarbeit zwischen Institutionen, Projekten, auch intern zwischen verschiedenen Stellen, mit Technikern, Workflow<br><br><b>Zusammenarbeit</b> |
| selbst thematisiert                    | Aufbau einer Webpräsenz oder einer Datenbank müssen Techniker übernehmen                              | Abgabe bestimmter Aufgaben an Techniker in Ordnung | Bedienbarkeit                                      | \I6-15\       | K 5.2b<br>Zusammenarbeit zwischen Institutionen, Projekten, auch intern zwischen verschiedenen Stellen, mit Technikern, Workflow<br><br><b>Zusammenarbeit</b> |
| <b>K 6<br/>Organisation/Verwaltung</b> |                                                                                                       |                                                    |                                                    |               |                                                                                                                                                               |
| <i>Benennung</i>                       | <i>Beschreibung</i>                                                                                   | <i>Bewertung</i>                                   | <i>Bezug</i>                                       | <i>Quelle</i> | <i>Reduktion</i>                                                                                                                                              |
| selbst thematisiert                    | Aufbau einer Versionierung und Dateiverwaltungssystem                                                 | Fülle von Fragen, bedeutendes Thema,               | Kollaboration/Kooperation                          | \I6-12\       | K 6.1a<br>Versionenverwaltung                                                                                                                                 |

## I6 Extraktion

|  |                          |                                   |  |  |                                                                                                                                                                                                          |
|--|--------------------------|-----------------------------------|--|--|----------------------------------------------------------------------------------------------------------------------------------------------------------------------------------------------------------|
|  | zu Kollaborationszwecken | folglich Bedarf in diesem Bereich |  |  | und<br>K 6.1b<br>Datenspeicherung und –verwaltung,<br>Langzeitarchivierung,<br>verbunden mit<br>Bearbeitungsmöglichkeiten<br>und Nachnutzung<br><br><b>Organisation und<br/> Verwaltung von Inhalten</b> |
|--|--------------------------|-----------------------------------|--|--|----------------------------------------------------------------------------------------------------------------------------------------------------------------------------------------------------------|
