# Supplementary material
Source: publisher site journal article supplement (https://www.degruyterbrill.com/publication/isbn/9783110463927/downloadAsset/9783110463927_Extraktionen_Reduktionen_fallbezogen.zip)
Supplement: Supplementary file 26 [file I7 Extraktion und Reduktion.pdf › fallbezogene Extraktionen und Reduktionen/I7 Extraktion und Reduktion.pdf]

## I7 Extraktion

| <b>TÄTIGKEITEN UND EDV-ERFAHRUNG</b>                                                                                                                      |                                                                           |                                                                                                                |                                |               |                                                                                    |
|-----------------------------------------------------------------------------------------------------------------------------------------------------------|---------------------------------------------------------------------------|----------------------------------------------------------------------------------------------------------------|--------------------------------|---------------|------------------------------------------------------------------------------------|
| <b>Tätigkeiten</b>                                                                                                                                        |                                                                           |                                                                                                                |                                |               |                                                                                    |
| <i>Gegenstände</i>                                                                                                                                        | <i>Methoden/Verfahren</i>                                                 | <i>Ziele/Fragen</i>                                                                                            | <i>Institutioneller Rahmen</i> | <i>Quelle</i> |                                                                                    |
| Projekt "digitale Akademie", Content-Management-gestützte Webseiten, musikwissenschaftliche, naturwissenschaftliche und geisteswissenschaftliche Inhalte, | Content-Management, Datenbanken, Programmierung, Software-Entwicklung     | Online-Verfügbarkeit, Texterschließung, Texterfassung                                                          | wiss. Akademie                 | \I7-1\        |                                                                                    |
| Onlinestellung von Editionen, Betreuung von Editionsprojekten, musikwissenschaftliche und geisteswissenschaftliche, stärkerer Einstieg geplant            | elektronische Editionsverfahren, Digitalisierung und Onlinestellen        | online Verfügbar machen                                                                                        | wiss. Akademie                 | \I7-2\        |                                                                                    |
| <b>Erfahrung</b>                                                                                                                                          |                                                                           |                                                                                                                |                                |               |                                                                                    |
|                                                                                                                                                           | <i>Beschreibung</i>                                                       | <i>Bewertung</i>                                                                                               |                                | <i>Quelle</i> |                                                                                    |
|                                                                                                                                                           | Entwickler, Internettechnologien wie Html, CSS, PHP, SQL-Datenbanken, XML | große Erfahrung in Entwicklung, Internettechnologie, Admin-Rolle, XML-Auszeichnung ist nicht die Kernkompetenz |                                | \I7-1\        |                                                                                    |
|                                                                                                                                                           | Historiker                                                                |                                                                                                                |                                | \I7-21\       |                                                                                    |
| <b>BEDARFSKATEGORIEN</b>                                                                                                                                  |                                                                           |                                                                                                                |                                |               |                                                                                    |
| <b>K 1</b>                                                                                                                                                |                                                                           |                                                                                                                |                                |               |                                                                                    |
| <b>Bedienbarkeit</b>                                                                                                                                      |                                                                           |                                                                                                                |                                |               |                                                                                    |
| <i>Benennung</i>                                                                                                                                          | <i>Beschreibung</i>                                                       | <i>Bewertung</i>                                                                                               | <i>Bezug</i>                   | <i>Quelle</i> | <i>Reduktion</i>                                                                   |
| selbst thematisiert                                                                                                                                       | Bugs in der Software, Eclipse-Umgebung                                    | kann Redakteuren noch nicht zugemutet werden, Eclipse-basiert ist                                              | Produktion/Manipulation        | \I7-4\        | K 1.1e<br>anfangs steile Lernkurve, Einarbeitung notwendig, danach gut (z.B. bzgl. |

## I7 Extraktion

|                     |                                                                                                                                                                          |                                                                   |                         |        |                                                                                                                                                                                                                                                                                   |
|---------------------|--------------------------------------------------------------------------------------------------------------------------------------------------------------------------|-------------------------------------------------------------------|-------------------------|--------|-----------------------------------------------------------------------------------------------------------------------------------------------------------------------------------------------------------------------------------------------------------------------------------|
|                     |                                                                                                                                                                          | gut, abschließendes Urteil erst in der Praxis möglich             |                         |        | <p>unterschiedlicher Navigations- und Bedienungsmöglichkeiten für dasselbe Ziel, menulastig)</p> <p><b>Benutzerführung / Erlernbarkeit</b></p> <p>K 1.3b<br/>zu unstabil, zu viele Programmierfehler, noch nicht einsetzbar</p> <p><b>Systemstabilität, Programmierfehler</b></p> |
| selbst thematisiert | Bedienbarkeit für Redakteure                                                                                                                                             | so noch nicht verwendbar, Notwendigkeit von vielen Verbesserungen | Produktion/Manipulation | \I7-6\ | <p>K 1.1.a<br/>zu schwierig/technisch für fachwissenschaftliche Nutzer, steile Lernkurve für herkömmlich Edierende</p> <p><b>Benutzerführung / Erlernbarkeit</b></p>                                                                                                              |
| selbst thematisiert | Tutorials und Learning-Plattform für das Erlernen von TextGrid zusätzlich zur kontextsensitiven Hilfe, kleinteilig in Schritten wie WYSIWYM-Editor, Projekt anlegen usw. | könnte gut angenommen werden, dann ist es machbar                 | Produktion/Manipulation | \I7-6\ | <p>K 1.1g<br/>Schulungen für technisch weniger versierte Nutzer, Schritt-für-Schritt-Anleitung, Heranführen/Einbinden der Community, didaktischer Prozess, Mehrwerte vermitteln, Testprojekte</p> <p><b>Benutzerführung /</b></p>                                                 |

# I7 Extraktion

|                                                                 |                                                                                                                                                                                                        |                                                                                                                                                                       |                         |         | <b>Erlernbarkeit</b>                                                                                                                                                              |
|-----------------------------------------------------------------|--------------------------------------------------------------------------------------------------------------------------------------------------------------------------------------------------------|-----------------------------------------------------------------------------------------------------------------------------------------------------------------------|-------------------------|---------|-----------------------------------------------------------------------------------------------------------------------------------------------------------------------------------|
| selbst thematisiert                                             | Eclipseoberfläche<br>übersichtlich                                                                                                                                                                     | positiv                                                                                                                                                               | Produktion/Manipulation | \I7-8\  | K 1.2a<br>Oberfläche ist übersichtlich,<br>sachlich<br><br><b>Orientierung /<br/>Übersichtlichkeit /<br/>Oberflächengestaltung</b>                                                |
| selbst thematisiert                                             | Lokalisierung, Mischmasch<br>statt deutschsprachiger<br>Oberfläche                                                                                                                                     | deutschsprachige<br>Oberfläche ist<br>notwendig                                                                                                                       | Produktion/Manipulation | \I7-8\  | K 1.2d<br>Deutschsprachige Oberfläche<br>nützlich/notwendig<br><br><b>Orientierung /<br/>Übersichtlichkeit /<br/>Oberflächengestaltung</b>                                        |
| selbst thematisiert                                             | Lokalisierung                                                                                                                                                                                          | ganz wichtig                                                                                                                                                          |                         | \I7-11\ | K 1.2d<br>Deutschsprachige Oberfläche<br>nützlich/notwendig<br><br><b>Orientierung /<br/>Übersichtlichkeit /<br/>Oberflächengestaltung</b>                                        |
| vom Interviewer<br>thematisiert, vom Befragten<br>konkretisiert | Transparenz bzw.<br>Komplexität der Bedienung<br>und Navigation i.S.v.: Was<br>mache ich wo, was muss ich<br>wo eingeben, z.B. Metadaten,<br>Vorwissen zu XML<br>notwendig, keine<br>Fehlerrückmeldung | zu techi für<br>Redakeure,<br>schwierig, nicht<br>selbsterklärend,<br>muss gelernt bzw.<br>vermittelt werden,<br>nicht unbedingt<br>Kritikpunkt,<br>sondern Bemerkung | Produktion/Manipulation | \I7-12\ | K 1.1.a<br>zu schwierig/technisch für<br>fachwissenschaftliche Nutzer,<br>steile Lernkurve für<br>herkömmlich Edierende<br>und<br>K 1.1c<br>Fehlerrückmeldung/<br>Fehlerkorrektur |

# I7 Extraktion

|                          |                     |                  |              |               |                                                                                                                                                                                                                                                                                                                                                                                                                                                                                                                                                                                                                    |
|--------------------------|---------------------|------------------|--------------|---------------|--------------------------------------------------------------------------------------------------------------------------------------------------------------------------------------------------------------------------------------------------------------------------------------------------------------------------------------------------------------------------------------------------------------------------------------------------------------------------------------------------------------------------------------------------------------------------------------------------------------------|
|                          |                     |                  |              |               | <p>problematisch, keine Rücksetzfunktion</p> <p><b>Benutzerführung / Erlernbarkeit</b></p> <p>K 1.2c<br/>Zurechtfinden, Komponenten und Sichten zuordnen ist am Anfang schwierig (evtl. gewohnte Website- und Ordnerstrukturierung besser)</p> <p><b>Orientierung / Übersichtlichkeit / Oberflächengestaltung</b></p> <p>K 1.4a<br/>XML/TEI ist eine Hürde, Unterstützung durch das System ist notwendig, Heranführen/Hilfemenu, Reduzierung der Schwelle, aber keine Vermeidung von spitzen Klammern, Komplexität abbilden, fachliche Mehrwerte vermitteln</p> <p><b>Bedienbarkeit der Auszeichnungsebene</b></p> |
| <b>K 2</b>               |                     |                  |              |               |                                                                                                                                                                                                                                                                                                                                                                                                                                                                                                                                                                                                                    |
| <b>Rezeption/Zugriff</b> |                     |                  |              |               |                                                                                                                                                                                                                                                                                                                                                                                                                                                                                                                                                                                                                    |
| <i>Benennung</i>         | <i>Beschreibung</i> | <i>Bewertung</i> | <i>Bezug</i> | <i>Quelle</i> | <i>Reduktion</i>                                                                                                                                                                                                                                                                                                                                                                                                                                                                                                                                                                                                   |

## I7 Extraktion

|                     |                                                                                                                          |                                       |                                    |         |                                                                                                                                                                                                                                                                                                        |
|---------------------|--------------------------------------------------------------------------------------------------------------------------|---------------------------------------|------------------------------------|---------|--------------------------------------------------------------------------------------------------------------------------------------------------------------------------------------------------------------------------------------------------------------------------------------------------------|
| selbst thematisiert | hierarchisierte Baumstrukturen, Ordnerstrukturen                                                                         | eingängig, versteht jeder, in Ordnung | Bedienung, Organisation/Verwaltung | \I7-19\ | K 2.2b<br>Leichte Zugänglichkeit, Übersicht durch Browser, Suchmasken, Ontologien, Klassifizierungen, Indizierungen, Strukturierungen<br><br><b>Zugriffsformen, Rezeptions- und Recherchemöglichkeiten</b>                                                                                             |
| selbst thematisiert | neue Zugriffsmöglichkeiten durch digitale Verfügbarkeit und XML-Auszeichnung, Semantisierung, neue Abfragemöglichkeiten  | Mehrwert, Trend                       |                                    | \I7-21\ | K 2.2a<br>Spezifizierbarkeit des Zugriffs, fachspezifische Zugriffsmöglichkeiten, verschiedene Zugriffsperspektiven durch Auszeichnungen und Präsentationsformen (z.B. parallele Ansicht von Faksimile und Transkription im TBLE)<br><br><b>Zugriffsformen, Rezeptions- und Recherchemöglichkeiten</b> |
| selbst thematisiert | Reduktion des Rechercheaufwandes, am Bsp. der Regesta Imperii, in kurzer Zeit Muster selektieren, Verfügbarkeit generell | Mehrwert, Trend                       |                                    | \I7-22\ | K 2.2b<br>Leichte Zugänglichkeit, Übersicht durch Browser, Suchmasken, Ontologien, Klassifizierungen, Indizierungen, Strukturierungen                                                                                                                                                                  |

## I7 Extraktion

|                                        |                                                                                                                    |                         |                           |               |                                                                                                                                                                                                                                                                                                                   |
|----------------------------------------|--------------------------------------------------------------------------------------------------------------------|-------------------------|---------------------------|---------------|-------------------------------------------------------------------------------------------------------------------------------------------------------------------------------------------------------------------------------------------------------------------------------------------------------------------|
|                                        |                                                                                                                    |                         |                           |               | <b>Zugriffsformen, Rezeptions- und Recherchemöglichkeiten</b>                                                                                                                                                                                                                                                     |
| selbst thematisiert                    | digitale Verfügbarmachung von Daten auch für die Öffentlichkeit, auch durch eine nicht-wissenschaftliche Community | zentraler Aspekt der DH | Kollaboration/Kooperation | \I7-24\       | K 2.1a<br>kostenloser Zugriff auf unterschiedliche Repositorien bzw. Ressourcen (z.B. Wörterbücher), Quellen und Ausgaben/ Editionen, Vergleichsmöglichkeiten mit anderen Projekten/ Quellen, orts- und rechnerunabhängiger Zugriff<br><br><b>Zugriff auf Inhalte</b>                                             |
| <b>K 3<br/>Produktion/Manipulation</b> |                                                                                                                    |                         |                           |               |                                                                                                                                                                                                                                                                                                                   |
| <i>Benennung</i>                       | <i>Beschreibung</i>                                                                                                | <i>Bewertung</i>        | <i>Bezug</i>              | <i>Quelle</i> | <i>Reduktion</i>                                                                                                                                                                                                                                                                                                  |
| selbst thematisiert                    | Zugriff auf ein Auszeichnungstool für Texte, die später importiert werden können in eine Online-Datenbank          |                         |                           | \I7-3\        | K 3.1b<br>XML-Auszeichnungs- bzw. Produktionshilfe, Tools zur digitalen Herstellung und Verfügbarmachung von Texten, XML-Schemata vorgefertigt für verschiedene individuelle Bedürfnisse, Konvertierung in XML/TEI, Baseline Encoding, Streaming Editor, Unterstützung bei zunächst geringerer Auszeichnungstiefe |

## I7 Extraktion

|                     |                                                                                                                                |                                                                                                  |                           |         |                                                                                                                                                                                                                                                                                                                                                |
|---------------------|--------------------------------------------------------------------------------------------------------------------------------|--------------------------------------------------------------------------------------------------|---------------------------|---------|------------------------------------------------------------------------------------------------------------------------------------------------------------------------------------------------------------------------------------------------------------------------------------------------------------------------------------------------|
|                     |                                                                                                                                |                                                                                                  |                           |         | <b>XML-Produktion</b>                                                                                                                                                                                                                                                                                                                          |
| selbst thematisiert | tiefe Auszeichnungsmöglichkeiten, volltextorientiertes Arbeiten                                                                | Frage nach eigenem Bedarf, eher volltextorientiert, weniger an Auszeichnung i.S.e. Apparats z.B. |                           | \I7-5\  | K 3.1c<br>Auszeichnungsmöglichkeiten / Informationsanreicherung zur Bearbeitung neuer Fragestellungen, tiefere Auszeichnung, spezifischere Auszeichnung je nach Forschungsinteresse (z.B. Musikwissenschaft), semantische Auszeichnung, Informationsmodellierung<br><br><b>XML-Produktion</b>                                                  |
| selbst thematisiert | Auszeichnungstiefe, Frage, wie tief sinnvoll ist, einige Philologen wollen Punkt und Komma auszeichnen, Gefahr des Verhedderns | Problematik                                                                                      |                           | \I7-15\ | K 3.1b<br>XML-Auszeichnungs- bzw. Produktionshilfe, Tools zur digitalen Herstellung und Verfügbarmachung von Texten, XML-Schemata vorgefertigt für verschiedene individuelle Bedürfnisse, Konvertierung in XML/TEI, Baseline Encoding, Streaming Editor, Unterstützung bei zunächst geringerer Auszeichnungstiefe<br><br><b>XML-Produktion</b> |
| selbst thematisiert | interaktive Komponenten wie Kommentierungsfunktion, Agenda/Korrigenda,                                                         | Wichtiger Mehrwert                                                                               | Kollaboration/Kooperation | \I7-25\ | K 3.3c<br>kollaborative Kommentierungen durch                                                                                                                                                                                                                                                                                                  |

## I7 Extraktion

|                                                           |                                                                                                           |                                                                                                             |                                                    |               |                                                                                                                                                          |
|-----------------------------------------------------------|-----------------------------------------------------------------------------------------------------------|-------------------------------------------------------------------------------------------------------------|----------------------------------------------------|---------------|----------------------------------------------------------------------------------------------------------------------------------------------------------|
|                                                           | Nutzerfeedback zu Inhalten                                                                                |                                                                                                             |                                                    |               | Nutzer, Agenda/Korrigenda, Notepad<br><br><b>Verknüpfungsmöglichkeiten und deren Visualisierung</b>                                                      |
| <b>K 4</b><br><b>Modularität/Anpassbarkeit</b>            |                                                                                                           |                                                                                                             |                                                    |               |                                                                                                                                                          |
| <i>Benennung</i>                                          | <i>Beschreibung</i>                                                                                       | <i>Bewertung</i>                                                                                            | <i>Bezug</i>                                       | <i>Quelle</i> | <i>Reduktion</i>                                                                                                                                         |
| vom Interviewer thematisiert                              | Anpassung der Benutzeroberfläche                                                                          | gut, aber Nutzung durch weniger technikaffine Nutzer fraglich                                               | Produktion/Manipulation                            | \I7-9\        | K 4.1a<br>Anpassung der Oberflächenkonfiguration<br><br><b>TextGrid-Oberfläche / Umgebung</b>                                                            |
| vom Interviewer thematisiert, vom Befragten konkretisiert | Anschließbarkeit von Tools, z.B. Lemmatisierer oder Wörterbuchsuche, alles in eine Plattform integrierbar | als Admin insofern interessant, als es für ein Porjekt gebraucht werden könnte, integrativer Ansatz positiv | Produktion/Manipulation                            | \I7-10\       | K 4.2a<br>Anschließbarkeit und Kombinierbarkeit von Tools und Services, auch von selbstentwickelten – modulares Konzept<br><br><b>Tools und Services</b> |
| selbst thematisiert                                       | aber von Seiten der Community gestaltbar sein, z.B. zusätzliche Rollendefinitionen im Rollenmanagement    | Wichtiger Mehrwert                                                                                          | Kollaboration/Kooperation, Organisation/Verwaltung | \I7-16\       | K 4.1b<br>Anpassbarkeit der Organisation (z.B. Rollenmanagement)<br><br><b>TextGrid-Oberfläche / Umgebung</b>                                            |
| selbst thematisiert                                       | Schablone, Exportierbarkeit und Weiterverwendbarkeit                                                      | Wäre sehr große Hilfe                                                                                       | Produktion/Manipulation                            | \I7-17\       | K 4.3c<br>Schemata und Metadaten-                                                                                                                        |



## I7 Extraktion

|                                                |                                                                                                                                                                                                                                                 |                                                     |                         |               |                                                                                                                                                                                          |
|------------------------------------------------|-------------------------------------------------------------------------------------------------------------------------------------------------------------------------------------------------------------------------------------------------|-----------------------------------------------------|-------------------------|---------------|------------------------------------------------------------------------------------------------------------------------------------------------------------------------------------------|
|                                                | der Auszeichnung im XML-Format                                                                                                                                                                                                                  |                                                     |                         |               | bzw. Auszeichnungs-Konzepte anpassen/nachnutzen und eigene einbinden<br><br><b>Inhalte</b>                                                                                               |
| <b>K 5</b><br><b>Kollaboration/Kooperation</b> |                                                                                                                                                                                                                                                 |                                                     |                         |               |                                                                                                                                                                                          |
| <i>Benennung</i>                               | <i>Beschreibung</i>                                                                                                                                                                                                                             | <i>Bewertung</i>                                    | <i>Bezug</i>            | <i>Quelle</i> | <i>Reduktion</i>                                                                                                                                                                         |
| vom Interviewer thematisiert                   | Zusammenarbeit von verschiedenen Arbeitsstellen aus, XML-Auszeichnung mit mehreren Leuten, Datenaustausch zu Auszeichnungsvorgängen birgt die Gefahr, dass aktuelle Versionen verloren gehen, Subversion-Management, zusätzlich Datensicherheit | positiv, zeitgemäß, möglicher Mehrwert von Textgrid | Produktion/Manipulation | \I7-13\       | K 5.2a<br>Zusammenarbeit in Teams von verschiedenen Orten aus, auch an einem Dokument, verteilte Bearbeitung verschiedener ‚Schichten‘ eines Dokuments usw.<br><br><b>Zusammenarbeit</b> |
| selbst thematisiert                            | Vorbehalte, Forschungsdaten preiszugeben bzw. zugänglich zu machen                                                                                                                                                                              | Problematik, wichtige Aufgabe für TG                | Organisation/Verwaltung | \I7-14\       | K 5.1b<br>Austausch von Arbeits- bzw. Forschungsergebnissen, Bereitschaft dazu<br><br><b>Austausch von Inhalten und Werkzeugen</b>                                                       |
| selbst thematisiert                            | es sollte in geisteswissenschaftlichen Projekten einen Administrator bzw. einen Zuständigen für die technische Infrastruktur geben                                                                                                              | gute Kooperationsform                               | Organisation/Verwaltung | \I7-16\       | K 5.2b<br>Zusammenarbeit zwischen Institutionen, Projekten, auch intern zwischen verschiedenen Stellen, mit Technikern, Workflow                                                         |

# I7 Extraktion

|                     |                                                                                                                                                                                                                                                                                           |                                                                         |                         |         | <b>Zusammenarbeit</b>                                                                                                                                                                                                                                                          |
|---------------------|-------------------------------------------------------------------------------------------------------------------------------------------------------------------------------------------------------------------------------------------------------------------------------------------|-------------------------------------------------------------------------|-------------------------|---------|--------------------------------------------------------------------------------------------------------------------------------------------------------------------------------------------------------------------------------------------------------------------------------|
| selbst thematisiert | Annahme, dass Projekte relativ fokussiert arbeiten, sieht nicht unbedingt die große Community-Entstehung mit der Gefahr des Orientierungsproblems in großen Datenmengen, Trennung des Community-bedingten von der Grundfunktionalität, früher Release und dann sehen, was angenommen wird |                                                                         | Organisation/Verwaltung | \I7-18\ | K 5.3a<br>Partizipation/Nutzung als Voraussetzung<br><br><b>Community-Building-Aspekte</b>                                                                                                                                                                                     |
| selbst thematisiert | Kontakt zwischen Projekten entsteht eher persönlich, über Browsen in Online-Plattform bzw. Knoten fraglich, Austausch über Beobachterrollen                                                                                                                                               | sehr interessante Funktion, Browsen eher als mögliches Communityfeature | Organisation/Verwaltung | \I7-20\ | K 5.1a<br>Austausch von Ressourcen, Nachnutzung<br>und<br>K 5.1b<br>Austausch von Arbeits- bzw. Forschungsergebnissen, Bereitschaft dazu<br>und<br>K 5.1c<br>Austausch von Arbeitsmitteln (Tools, Formaten, Skripten usw.)<br><br><b>Austausch von Inhalten und Werkzeugen</b> |
| selbst thematisiert | Standardisierung als Möglichkeiten, Daten nachzunutzen, die in einem Projekt schon erschlossen                                                                                                                                                                                            | cool, auch in finanzieller Hinsicht                                     | Produktion/Manipulation | \I7-23\ | K 5.1a<br>Austausch von Ressourcen, Nachnutzung<br>und                                                                                                                                                                                                                         |

## I7 Extraktion

|                                        |                                                                                                 |                                     |                   |               |                                                                                                                                                                                  |
|----------------------------------------|-------------------------------------------------------------------------------------------------|-------------------------------------|-------------------|---------------|----------------------------------------------------------------------------------------------------------------------------------------------------------------------------------|
|                                        | wurden, Open-Source-Gedanke                                                                     |                                     |                   |               | K 5.1d<br>Standards, TEI,<br>Unabhängigkeit von<br>Datenformaten<br><b>Austausch von Inhalten und Werkzeugen</b>                                                                 |
| selbst thematisiert                    | Nutzung digitalisierter Daten auch durch nicht-wissenschaftliche Community, Crowd-Sourcing-Bsp. | erstaunliche Möglichkeiten, wichtig | Rezeption/Zugriff | \I7-24\       | K 5.3c<br>Crowd-Sourcing, Einbindung nicht-akademischer Nutzer/innen<br><br><b>Community-Building-Aspekte</b>                                                                    |
| <b>K 6<br/>Organisation/Verwaltung</b> |                                                                                                 |                                     |                   |               |                                                                                                                                                                                  |
| <i>Benennung</i>                       | <i>Beschreibung</i>                                                                             | <i>Bewertung</i>                    | <i>Bezug</i>      | <i>Quelle</i> | <i>Reduktion</i>                                                                                                                                                                 |
| selbst thematisiert                    | Datenvorhaltung in einem Repository, netzwerkbasierend                                          | guter neuer Ansatz                  |                   | \I7-7\        | K 6.1b<br>Datenspeicherung und –verwaltung, Langzeitarchivierung, verbunden mit Bearbeitungsmöglichkeiten und Nachnutzung<br><br><b>Organisation und Verwaltung von Inhalten</b> |
| selbst thematisiert                    | Speichern und Login-Verfahren                                                                   | essentiell, derzeit Bugs            | Bedienbarkeit     | \I7-11\       | K 6.1b<br>Datenspeicherung und –verwaltung, Langzeitarchivierung, verbunden mit Bearbeitungsmöglichkeiten                                                                        |

# I7 Extraktion

|                              |                                                                                                                                                      |                                                     |                           |         |                                                                                                                                                                                                     |
|------------------------------|------------------------------------------------------------------------------------------------------------------------------------------------------|-----------------------------------------------------|---------------------------|---------|-----------------------------------------------------------------------------------------------------------------------------------------------------------------------------------------------------|
|                              |                                                                                                                                                      |                                                     |                           |         | und Nachnutzung<br><br><b>Organisation und Verwaltung von Inhalten</b><br><br>K 6.2a<br>Workflow-Organisation,<br>Projekt-Verwaltung<br><br><b>Organisation und Verwaltung von Arbeitsprozessen</b> |
| vom Interviewer thematisiert | Datenaustausch zu Auszeichnungsvorgängen birgt die Gefahr, dass aktuelle Versionen verloren gehen, Subversion-Management, zusätzlich Datensicherheit | positiv, zeitgemäß, möglicher Mehrwert von Textgrid | Produktion/Manipulation   | \I7-13\ | K 6.1a<br>Versionenverwaltung<br><br><b>Organisation und Verwaltung von Inhalten</b>                                                                                                                |
| selbst thematisiert          | Datensicherheit, perfekte Sicherung, Vermittlung von Datensicherheit als Aufgabe, Transparenz der Sicherungsfunktionalität                           | Wichtig                                             | Kollaboration/Kooperation | \I7-14\ | K 6.1b<br>Datenspeicherung und –verwaltung, Langzeitarchivierung, verbunden mit Bearbeitungsmöglichkeiten und Nachnutzung<br><br><b>Organisation und Verwaltung von Inhalten</b>                    |
| selbst thematisiert          | Infrastruktur-Netzwerk muss zuverlässig funktionieren, muss von Seiten der Systemanbieter geboten werden                                             | Wichtige Funktionalität, essentiell                 | Kollaboration/Kooperation | \I7-16\ | K 6.2a<br>Workflow-Organisation, Projekt-Verwaltung<br><br><b>Organisation und</b>                                                                                                                  |

## I7 Extraktion

|  |  |  |  |  |                                            |
|--|--|--|--|--|--------------------------------------------|
|  |  |  |  |  | <b>Verwaltung von<br/>Arbeitsprozessen</b> |
|--|--|--|--|--|--------------------------------------------|
