# Supplementary material
Source: publisher site journal article supplement (https://www.degruyterbrill.com/publication/isbn/9783110463927/downloadAsset/9783110463927_Extraktionen_Reduktionen_fallbezogen.zip)
Supplement: Supplementary file 27 [file I8 Extraktion und Reduktion.pdf › fallbezogene Extraktionen und Reduktionen/I8 Extraktion und Reduktion.pdf]

## I8 Extraktion

| <b>TÄTIGKEITEN UND EDV-ERFAHRUNG</b>                                                |                                                                                                              |                                                                                                                                                                                       |                                               |               |                                                                                                                                                                              |
|-------------------------------------------------------------------------------------|--------------------------------------------------------------------------------------------------------------|---------------------------------------------------------------------------------------------------------------------------------------------------------------------------------------|-----------------------------------------------|---------------|------------------------------------------------------------------------------------------------------------------------------------------------------------------------------|
| <b>Tätigkeiten</b>                                                                  |                                                                                                              |                                                                                                                                                                                       |                                               |               |                                                                                                                                                                              |
| <i>Gegenstände</i>                                                                  | <i>Methoden/Verfahren</i>                                                                                    | <i>Ziele/Fragen</i>                                                                                                                                                                   | <i>Institutioneller Rahmen</i>                | <i>Quelle</i> |                                                                                                                                                                              |
| epigraphischer Schwerpunkt, hebräische, jüdische Grabinschriften, 15000 Inschriften | digital edieren, von Buchedition auf Digitaledition                                                          |                                                                                                                                                                                       | Universität                                   | \I8-1\        |                                                                                                                                                                              |
| bieten Open Access an                                                               | Erstellung/Anbieten von TEI- oder Plain-Text zum Runterladen                                                 | Inschriften-Korpus liest man ja nicht vollständig, daher eher verschiedene Zugänge/Fragestellungen ermöglichen, Ermöglichen, dass andere direkt damit arbeiten können, Auffindbarkeit | Universität, Forschungs- bzw. Editionsprojekt | \I8-2\        |                                                                                                                                                                              |
| <b>Erfahrung</b>                                                                    |                                                                                                              |                                                                                                                                                                                       |                                               |               |                                                                                                                                                                              |
|                                                                                     | <i>Beschreibung</i>                                                                                          | <i>Bewertung</i>                                                                                                                                                                      |                                               | <i>Quelle</i> |                                                                                                                                                                              |
|                                                                                     | TEI, XHTML-Ausgabe, TUSTEP-Datenbank und TUSCRIPT als zentrale Bearbeitungsinstrumente                       | sehr stark damit befasst, Text-Encoding immer auf der Agenda                                                                                                                          |                                               | \I8-1\        |                                                                                                                                                                              |
| <b>BEDARFSKATEGORIEN</b>                                                            |                                                                                                              |                                                                                                                                                                                       |                                               |               |                                                                                                                                                                              |
| <b>K 1 Bedienbarkeit</b>                                                            |                                                                                                              |                                                                                                                                                                                       |                                               |               |                                                                                                                                                                              |
| <i>Benennung</i>                                                                    | <i>Beschreibung</i>                                                                                          | <i>Bewertung</i>                                                                                                                                                                      | <i>Bezug</i>                                  | <i>Quelle</i> | <i>Reduktion</i>                                                                                                                                                             |
| selbst thematisiert                                                                 | stärkere Benutzerführung bei der Texteingabe, relativ relevante Dinge aus der Fülle von Kodierungen anbieten | hat nicht gefallen, Verbesserung notwendig                                                                                                                                            | Produktion/Manipulation                       | \I8-9\        | K 1.4a<br>XML/TEI ist eine Hürde, Unterstützung durch das System ist notwendig, Heranführen/Hilfemenu, Reduzierung der Schwelle, aber keine Vermeidung von spitzen Klammern, |

## I8 Extraktion

|                              |                                                                     |                                                                                                                                                           |                         |         |                                                                                                                                                                                                                                                                                                                     |
|------------------------------|---------------------------------------------------------------------|-----------------------------------------------------------------------------------------------------------------------------------------------------------|-------------------------|---------|---------------------------------------------------------------------------------------------------------------------------------------------------------------------------------------------------------------------------------------------------------------------------------------------------------------------|
|                              |                                                                     |                                                                                                                                                           |                         |         | Komplexität abbilden,<br>fachliche Mehrwerte<br>vermitteln<br><br><b>Bedienbarkeit der<br/>Auszeichnungsebene</b>                                                                                                                                                                                                   |
| selbst thematisiert          | über Baseline-Encoding<br>Brücken bauen                             | stärker vermitteln, TG ist<br>noch eher für Experten,<br>sollte aber auch für<br>Sudenten benutzbar sein                                                  | Produktion/Manipulation | \I8-9\  | K 1.4a<br>XML/TEI ist eine Hürde,<br>Unterstützung durch das<br>System ist notwendig,<br>Heranführen/Hilfemenu,<br>Reduzierung der Schwelle,<br>aber keine Vermeidung von<br>spitzen Klammern,<br>Komplexität abbilden,<br>fachliche Mehrwerte<br>vermitteln<br><br><b>Bedienbarkeit der<br/>Auszeichnungsebene</b> |
| vom Interviewer thematisiert | mit Masken und Schemas<br>Benutzerführung, geht<br>auch über TUSTEP | hat über TUSTEP gut<br>geklappt, wäre sonst<br>nicht die Welt der Leute,<br>die mit dem Editor<br>arbeiten müssen, TG<br>aber schon sehr<br>übersichtlich | Produktion/Manipulation | \I8-10\ | K 1.4a<br>XML/TEI ist eine Hürde,<br>Unterstützung durch das<br>System ist notwendig,<br>Heranführen/Hilfemenu,<br>Reduzierung der Schwelle,<br>aber keine Vermeidung von<br>spitzen Klammern,<br>Komplexität abbilden,<br>fachliche Mehrwerte<br>vermitteln<br><b>Bedienbarkeit der<br/>Auszeichnungsebene</b>     |

| <b>K 2</b>               |                                                                                                                                                     |                                        |                                                  |               |                                                                                                                                                                                                            |
|--------------------------|-----------------------------------------------------------------------------------------------------------------------------------------------------|----------------------------------------|--------------------------------------------------|---------------|------------------------------------------------------------------------------------------------------------------------------------------------------------------------------------------------------------|
| <b>Rezeption/Zugriff</b> |                                                                                                                                                     |                                        |                                                  |               |                                                                                                                                                                                                            |
| <i>Benennung</i>         | <i>Beschreibung</i>                                                                                                                                 | <i>Bewertung</i>                       | <i>Bezug</i>                                     | <i>Quelle</i> | <i>Reduktion</i>                                                                                                                                                                                           |
| selbst thematisiert      | Such- und Ersetz-Funktion, strukturelles Suchen, Register, Lemmalisten, andere Zugänge zum Text, Tustep-Funktionen, anderes philologisches Werkzeug | würde sich gut machen, hätte man gerne | Produktion/Manipulation                          | \I8-8\        | K 2.2b<br>Leichte Zugänglichkeit, Übersicht durch Browser, Suchmasken, Ontologien, Klassifizierungen, Indizierungen, Strukturierungen<br><br><b>Zugriffsformen, Rezeptions- und Recherchemöglichkeiten</b> |
| selbst thematisiert      | Sortieren, Muster erkennen, Pattern Matching, TUSTEP-Tools in großen TG-Korpora                                                                     | Wunsch                                 | Produktion/Manipulation                          | \I8-17\       | K 2.2b<br>Leichte Zugänglichkeit, Übersicht durch Browser, Suchmasken, Ontologien, Klassifizierungen, Indizierungen, Strukturierungen<br><br><b>Zugriffsformen, Rezeptions- und Recherchemöglichkeiten</b> |
| selbst thematisiert      | Repositoriumsgedanke, gemeinsam über eine Vielzahl von Texten verfügen, direkt reagieren, erweitern und zurückmelden                                | am interessantesten                    | Produktion/Manipulation, Organisation/Verwaltung | \I8-18\       | K 2.1c<br>nicht rein rezeptiver, sondern auch produktiver, „schreibender“ Zugriff, auch in der eigenen Forschungsumgebung, auch auf den Quellcode<br><br><b>Zugriff auf Inhalte</b>                        |

## I8 Extraktion

| <b>K 3<br/>Produktion/Manipulation</b> |                                                                                                                                          |                                                              |               |               |                                                                                                                                                                                                                                                                                                                                                                                 |
|----------------------------------------|------------------------------------------------------------------------------------------------------------------------------------------|--------------------------------------------------------------|---------------|---------------|---------------------------------------------------------------------------------------------------------------------------------------------------------------------------------------------------------------------------------------------------------------------------------------------------------------------------------------------------------------------------------|
| <i>Benennung</i>                       | <i>Beschreibung</i>                                                                                                                      | <i>Bewertung</i>                                             | <i>Bezug</i>  | <i>Quelle</i> | <i>Reduktion</i>                                                                                                                                                                                                                                                                                                                                                                |
| selbst thematisiert                    | Notepad, Zettelkasten, Gedanken notieren, nicht kodieren, niedrigschwellig                                                               | Wäre super, eine Bereicherung                                |               | \I8-8\        | K 3.3c<br>kollaborative<br>Kommentierungen durch<br>Nutzer, Agenda/Korrigenda,<br>Notepad<br><br><b>Verknüpfungsmöglichkeiten<br/>und deren Visualisierung</b>                                                                                                                                                                                                                  |
| selbst thematisiert                    | Baseline-Encoding, Gefahr des Ertrinkens in der Tag-Flut                                                                                 | BE sinnvoll, mehr vermitteln und anpreisen                   | Bedienbarkeit | \I8-9\        | K 3.1b<br>XML-Auszeichnungs- bzw.<br>Produktionshilfe, Tools zur<br>digitalen Herstellung und<br>Verfügbarmachung von<br>Texten, XML-Schemata<br>vorgefertigt für verschiedene<br>individuelle Bedürfnisse,<br>Konvertierung in XML/TEI,<br>Baseline Encoding, Streaming<br>Editor, Unterstützung bei<br>zunächst geringerer<br>Auszeichnungstiefe<br><br><b>XML-Produktion</b> |
| selbst thematisiert                    | Streaming-Editor, Rahmen-Tag, sonst zu mustergültig, später projektspezifische Strukturierung, von Plain-Text zu XML den Weg beschreiben | Wäre sinnvoll, komplexe Kodierung schreckt sonst kolossal ab | Bedienbarkeit | \I8-12\       | K 3.1b<br>XML-Auszeichnungs- bzw.<br>Produktionshilfe, Tools zur<br>digitalen Herstellung und<br>Verfügbarmachung von<br>Texten, XML-Schemata<br>vorgefertigt für verschiedene                                                                                                                                                                                                  |

## I8 Extraktion

|                     |                                                                                                                                                              |                |               |         |                                                                                                                                                                                                                                                                                                                                                                                                                                                                                                 |
|---------------------|--------------------------------------------------------------------------------------------------------------------------------------------------------------|----------------|---------------|---------|-------------------------------------------------------------------------------------------------------------------------------------------------------------------------------------------------------------------------------------------------------------------------------------------------------------------------------------------------------------------------------------------------------------------------------------------------------------------------------------------------|
|                     |                                                                                                                                                              |                |               |         | individuelle Bedürfnisse, Konvertierung in XML/TEI, Baseline Encoding, Streaming Editor, Unterstützung bei zunächst geringerer Auszeichnungstiefe<br><br><b>XML-Produktion</b>                                                                                                                                                                                                                                                                                                                  |
| selbst thematisiert | Suchen und Ersetzen für das Taggen nutzen, Bsp. Personaltag, OCR-erkannte Texte nach und nach strukturieren, auch in der Begriffsgeschichte, suchen Diskurse | Wunsch         |               | \I8-13\ | K 3.1b<br>XML-Auszeichnungs- bzw. Produktionshilfe, Tools zur digitalen Herstellung und Verfügbarmachung von Texten, XML-Schemata vorgefertigt für verschiedene individuelle Bedürfnisse, Konvertierung in XML/TEI, Baseline Encoding, Streaming Editor, Unterstützung bei zunächst geringerer Auszeichnungstiefe<br><br><b>XML-Produktion</b><br>und<br>K 3.4b<br>Geschwindigkeit, Effizienz, Effektivität, Genauigkeit der Arbeit verbessern<br><br><b>Produktionsunterstützung allgemein</b> |
| selbst thematisiert | halbautomatisches Konvertieren, Text                                                                                                                         | Wäre großartig | Bedienbarkeit | \I8-15\ | K 3.1b<br>XML-Auszeichnungs- bzw.                                                                                                                                                                                                                                                                                                                                                                                                                                                               |

## I8 Extraktion

|                                                           |                                                                                                                                                                       |                  |                         |               |                                                                                                                                                                                                                                                                                                              |
|-----------------------------------------------------------|-----------------------------------------------------------------------------------------------------------------------------------------------------------------------|------------------|-------------------------|---------------|--------------------------------------------------------------------------------------------------------------------------------------------------------------------------------------------------------------------------------------------------------------------------------------------------------------|
|                                                           | hochladen, Tiefe der Strukturierung abfragen, TEI-konformes Arbeiten, ohne sich detailliert auszukennen, Bsp. Briefe Baseline-Encoding, Formatvorlagen                |                  |                         |               | Produktionshilfe, Tools zur digitalen Herstellung und Verfügbarmachung von Texten, XML-Schemata vorgefertigt für verschiedene individuelle Bedürfnisse, Konvertierung in XML/TEI, Baseline Encoding, Streaming Editor, Unterstützung bei zunächst geringerer Auszeichnungstiefe<br><br><b>XML-Produktion</b> |
| <b>K 4</b>                                                |                                                                                                                                                                       |                  |                         |               |                                                                                                                                                                                                                                                                                                              |
| <b>Modularität/Anpassbarkeit</b>                          |                                                                                                                                                                       |                  |                         |               |                                                                                                                                                                                                                                                                                                              |
| <i>Benennung</i>                                          | <i>Beschreibung</i>                                                                                                                                                   | <i>Bewertung</i> | <i>Bezug</i>            | <i>Quelle</i> | <i>Reduktion</i>                                                                                                                                                                                                                                                                                             |
| vom Interviewer thematisiert, vom Befragten konkretisiert | schnell eigene Wörterbücher einbauen, z.B. epigraphisches oder begriffsgeschichtliches Wörterbuch, das kontinuierlich erweitert werden kann, Tools allgemein einbauen | Wäre interessant | Produktion/Manipulation | \I8-11\       | K 4.2a<br>Anschließbarkeit und Kombinierbarkeit von Tools und Services, auch von selbstentwickelten – modulares Konzept<br><br><b>Tools und Services</b><br>und<br>K 4.3a<br>Anschließbarkeit/Nachnutzung von Ressourcen, Formate mappen<br><br><b>Inhalte</b>                                               |
| selbst thematisiert                                       | projektspezifisches Wörterbuch                                                                                                                                        | Wunsch           |                         | \I8-14\       | K 4.3a<br>Anschließbarkeit/Nachnutzung                                                                                                                                                                                                                                                                       |

# I8 Extraktion

|                                                                 |                                                                                                                                                                                                                                                                                                                                               |                                                                                                                                                                                                                    |                         |               |                                                                                                                                                                                                         |
|-----------------------------------------------------------------|-----------------------------------------------------------------------------------------------------------------------------------------------------------------------------------------------------------------------------------------------------------------------------------------------------------------------------------------------|--------------------------------------------------------------------------------------------------------------------------------------------------------------------------------------------------------------------|-------------------------|---------------|---------------------------------------------------------------------------------------------------------------------------------------------------------------------------------------------------------|
|                                                                 |                                                                                                                                                                                                                                                                                                                                               |                                                                                                                                                                                                                    |                         |               | von Ressourcen, Formate<br>mappen<br><br><b>Inhalte</b>                                                                                                                                                 |
| <b>K 5<br/>Kollaboration/Kooperation</b>                        |                                                                                                                                                                                                                                                                                                                                               |                                                                                                                                                                                                                    |                         |               |                                                                                                                                                                                                         |
| <i>Benennung</i>                                                | <i>Beschreibung</i>                                                                                                                                                                                                                                                                                                                           | <i>Bewertung</i>                                                                                                                                                                                                   | <i>Bezug</i>            | <i>Quelle</i> | <i>Reduktion</i>                                                                                                                                                                                        |
| selbst thematisiert                                             | Aufbau von TG auf TEI,<br>Vorgabe von Strukturen<br>bzw. Standards durch TG,<br>Baseline Encoding, TG<br>lässt nicht einfach nur<br>jeden wursteln                                                                                                                                                                                            | sehr sehr wichtig, so<br>stark nicht erwartet,<br>Erwartungen übertroffen                                                                                                                                          | Produktion/Manipulation | \I8-5\        | K 5.1d<br>Standards, TEI,<br>Unabhängigkeit von<br>Datenformaten<br><br><b>Austausch von Inhalten und<br/>Werkzeugen</b>                                                                                |
| vom Interviewer<br>thematisiert, vom Befragten<br>konkretisiert | auch institutionsintern<br>Zusammenarbeit von<br>verschiedenen<br>Arbeitsplätzen aus,<br>derzeit Telefon und Mail,<br>Google-Docs als<br>Alternative, TG aber mit<br>TEI-Strukturen, Encoding<br>für epigraphische Daten,<br>gemeinsamer Editor,<br>gemeinsam darüber<br>Probleme verhandeln,<br>direkt am Objekt<br>spielen/zusammenarbeiten | klappt noch nicht so,<br>wäre aber eine mögliche<br>Perspektive, wäre super,<br>könnte einschlagen, auch<br>international, besser als<br>über eine Markup-<br>mailing-Liste, in der man<br>endlos beschreiben muss | Produktion/Manipulation | \I8-6\        | K 5.2a<br>Zusammenarbeit in Teams von<br>verschiedenen Orten aus, auch<br>an einem Dokument, verteilte<br>Bearbeitung verschiedener<br>'Schichten' eines Dokuments<br>usw.<br><br><b>Zusammenarbeit</b> |
| selbst thematisiert                                             | interdisziplinär nutzbare<br>gemeinsame Textkorpora,<br>sinnvoll und vergleichbar<br>strukturiert, Austausch<br>über Fächergrenzen                                                                                                                                                                                                            | Wunsch                                                                                                                                                                                                             | Produktion/Manipulation | \I8-16\       | K 5.1a<br>Austausch von Ressourcen,<br>Nachnutzung<br>und<br>K 5.1c                                                                                                                                     |

## I8 Extraktion

|                     |                                                                                                                                              |                     |                         |         |                                                                                                                                                                                                  |
|---------------------|----------------------------------------------------------------------------------------------------------------------------------------------|---------------------|-------------------------|---------|--------------------------------------------------------------------------------------------------------------------------------------------------------------------------------------------------|
|                     | hinweg, eigene Fragestellungen und Herangehensweisen und die anderer sichtbar                                                                |                     |                         |         | Austausch von Arbeitsmitteln (Tools, Formaten, Skripten usw.)<br><br><b>Austausch von Inhalten und Werkzeugen</b><br><br>K 5.2c<br>Interdisziplinäre Zusammenarbeit<br><br><b>Zusammenarbeit</b> |
| selbst thematisiert | Repositoriumsgedanke, gemeinsam über eine Vielzahl von Texten verfügen, sichtbar sein                                                        | am interessantesten | Rezeption/Zugriff       | \I8-18\ | K 5.1a<br>Austausch von Ressourcen, Nachnutzung und<br>K 5.1b<br>Austausch von Arbeits- bzw. Forschungsergebnissen, Bereitschaft dazu<br><br><b>Austausch von Inhalten und Werkzeugen</b>        |
| selbst thematisiert | interdisziplinär über Markup Strukturen austauschen, Vorstrukturierung durch Infrastruktur, fach- bzw. projektspezifische Feinstrukturierung | Wunsch, Potenzial   | Produktion/Manipulation | \I8-19\ | K 5.1c<br>Austausch von Arbeitsmitteln (Tools, Formaten, Skripten usw.)<br>und<br>K 5.1d<br>Standards, TEI, Unabhängigkeit von Datenformaten                                                     |



## I8 Extraktion

|                              |                                                                                                                                                                                                    |                                   |                                                  |         |                                                                                                                                                                                           |
|------------------------------|----------------------------------------------------------------------------------------------------------------------------------------------------------------------------------------------------|-----------------------------------|--------------------------------------------------|---------|-------------------------------------------------------------------------------------------------------------------------------------------------------------------------------------------|
|                              |                                                                                                                                                                                                    |                                   |                                                  |         | <b>Austausch von Inhalten und Werkzeugen</b>                                                                                                                                              |
| selbst thematisiert          | Möglichkeit, Texte auch in Arbeit zur Verfügung zu stellen, Sichtbarkeit                                                                                                                           | Wunsch, bereichert durch Feedback | Organisation/Verwaltung, Produktion/Manipulation | \I8-20\ | K 5.2a<br>Zusammenarbeit in Teams von verschiedenen Orten aus, auch an einem Dokument, verteilte Bearbeitung verschiedener ‚Schichten‘ eines Dokuments usw.<br><br><b>Zusammenarbeit</b>  |
| selbst thematisiert          | Zustandekommen einer Community und Ankommen bei einer Community, die nach Standards strukturiert Texte online zur Verfügung stellt und austauscht, nicht nur auf das Buch am Ende ausgerichtet ist | zunehmend skeptischer             | Produktion/Manipulation, Organisation/Verwaltung | \I8-21\ | K 5.1a<br>Austausch von Ressourcen, Nachnutzung und<br>K 5.1b<br>Austausch von Arbeits- bzw. Forschungsergebnissen, Bereitschaft dazu<br><br><b>Austausch von Inhalten und Werkzeugen</b> |
| vom Interviewer thematisiert | Daten kostenlos öffentlich verfügbar machen, Wir wollen das, werden gefragt, können wir das umsonst machen, Einstellung sitzt tief, stark auf Buch ausgerichtet                                    | skeptisch                         | Organisation/Verwaltung                          | \I8-22\ | K 5.1a<br>Austausch von Ressourcen, Nachnutzung und<br>K 5.1b<br>Austausch von Arbeits- bzw. Forschungsergebnissen, Bereitschaft dazu<br><br><b>Austausch von Inhalten und</b>            |

## I8 Extraktion

|                                        |                                                                                                                                                                         |                                    |                                                    |               | <b>Werkzeugen</b>                                                                                                                                                                                                                              |
|----------------------------------------|-------------------------------------------------------------------------------------------------------------------------------------------------------------------------|------------------------------------|----------------------------------------------------|---------------|------------------------------------------------------------------------------------------------------------------------------------------------------------------------------------------------------------------------------------------------|
| <b>K 6<br/>Organisation/Verwaltung</b> |                                                                                                                                                                         |                                    |                                                    |               |                                                                                                                                                                                                                                                |
| <i>Benennung</i>                       | <i>Beschreibung</i>                                                                                                                                                     | <i>Bewertung</i>                   | <i>Bezug</i>                                       | <i>Quelle</i> | <i>Reduktion</i>                                                                                                                                                                                                                               |
| selbst thematisiert                    | Wahrnehmbarkeit, Sichtbarkeit, Ort, an dem das Material abgelagert und zugänglich gemacht werden kann, ein weiterer Zugang, der nicht an unsere Oberfläche gebunden ist | Ziel, Bedarf                       |                                                    | \I8-3\        | K 6.1b<br>Datenspeicherung und –verwaltung, Langzeitarchivierung, verbunden mit Bearbeitungsmöglichkeiten und Nachnutzung und<br>K 6.1d<br>Eigene Sichtbarkeit, Publikationsmöglichkeit<br><br><b>Organisation und Verwaltung von Inhalten</b> |
| selbst thematisiert                    | Repositorium, in dem man nicht nur Material ablegen, sondern auch arbeiten kann, nicht nur Archiv, sondern auch Lab                                                     | nicht enttäuscht von TG, Potenzial | Produktion/Manipulation                            | \I8-4\        | K 6.1b<br>Datenspeicherung und –verwaltung, Langzeitarchivierung, verbunden mit Bearbeitungsmöglichkeiten und Nachnutzung<br><br><b>Organisation und Verwaltung von Inhalten</b>                                                               |
| vom Interviewer thematisiert           | Vergleichs-History für Versionen von Textzeugen                                                                                                                         | sinnvoll                           | Produktion/Manipulation, Kollaboration/Kooperation | \I8-7\        | K 6.1a<br>Versionenverwaltung<br><br><b>Organisation und</b>                                                                                                                                                                                   |

## I8 Extraktion

|                     |                                                                                       |                                   |                                                    |         | <b>Verwaltung von Inhalten</b>                                                                                |
|---------------------|---------------------------------------------------------------------------------------|-----------------------------------|----------------------------------------------------|---------|---------------------------------------------------------------------------------------------------------------|
| selbst thematisiert | Repositoriumsgedanke, gemeinsam über eine Vielzahl von Texten verfügen, sichtbar sein | am interessantesten               | Kollaboration/Kooperation, Rezeption/Zugriff       | \I8-18\ | K 6.1d<br>Eigene Sichtbarkeit, Publikationsmöglichkeit<br><br><b>Organisation und Verwaltung von Inhalten</b> |
| selbst thematisiert | Möglichkeit, Texte auch in Arbeit zur Verfügung zu stellen, Sichtbarkeit              | Wunsch, bereichert durch Feedback | Kollaboration/Kooperation, Produktion/Manipulation | \I8-20\ | K 6.1d<br>Eigene Sichtbarkeit, Publikationsmöglichkeit<br><br><b>Organisation und Verwaltung von Inhalten</b> |
