# Supplementary material
Source: publisher site journal article supplement (https://www.degruyterbrill.com/publication/isbn/9783110463927/downloadAsset/9783110463927_Extraktionen_Reduktionen_fallbezogen.zip)
Supplement: Supplementary file 28 [file I9 Extraktion und Reduktion.pdf › fallbezogene Extraktionen und Reduktionen/I9 Extraktion und Reduktion.pdf]

## I9 Extraktion

| <b>TÄTIGKEITEN UND EDV-ERFAHRUNG</b>                                                                                                      |                                                                                                                                             |                                                                                                                                                                                                                     |                                                    |               |                                                                                                                                                        |
|-------------------------------------------------------------------------------------------------------------------------------------------|---------------------------------------------------------------------------------------------------------------------------------------------|---------------------------------------------------------------------------------------------------------------------------------------------------------------------------------------------------------------------|----------------------------------------------------|---------------|--------------------------------------------------------------------------------------------------------------------------------------------------------|
| <b>Tätigkeiten</b>                                                                                                                        |                                                                                                                                             |                                                                                                                                                                                                                     |                                                    |               |                                                                                                                                                        |
| <i>Gegenstände</i>                                                                                                                        | <i>Methoden/Verfahren</i>                                                                                                                   | <i>Ziele/Fragen</i>                                                                                                                                                                                                 | <i>Institutioneller Rahmen</i>                     | <i>Quelle</i> |                                                                                                                                                        |
| Musik und Germanistik, musikwissenschaftliche Edition, insbesondere Briefwechsel, Hybridausgabe, Vernetzung vieler verschiedener Ausgaben | editionswissenschaftliche Methoden und Verfahren, auch digital gestützt                                                                     | digitale und gedruckte Ausgabe, Vernetzung verschiedener Ausgaben                                                                                                                                                   | Universität, Forschungs- bzw. Editionsprojekt      | \I9-1\        |                                                                                                                                                        |
| <b>Erfahrung</b>                                                                                                                          |                                                                                                                                             |                                                                                                                                                                                                                     |                                                    |               |                                                                                                                                                        |
|                                                                                                                                           | <i>Beschreibung</i>                                                                                                                         | <i>Bewertung</i>                                                                                                                                                                                                    |                                                    | <i>Quelle</i> |                                                                                                                                                        |
|                                                                                                                                           | Computerlinguist und Musikwissenschaftler, als Magisterarbeit Transkription einer Quelle, XML, XSLT, Java-Script                            | sehr gute EDV-Kenntnisse, fortgeschritten, editionswissenschaftliche Erfahrung nicht zeitlich lange, aber mit verschiedenen Ausgaben, schon ein bisschen etwas gesehen im Bereich Musikwissenschaft und Germanistik |                                                    | \I9-1\        |                                                                                                                                                        |
| <b>BEDARFSKATEGORIEN</b>                                                                                                                  |                                                                                                                                             |                                                                                                                                                                                                                     |                                                    |               |                                                                                                                                                        |
| <b>K 1</b>                                                                                                                                |                                                                                                                                             |                                                                                                                                                                                                                     |                                                    |               |                                                                                                                                                        |
| <b>Bedienbarkeit</b>                                                                                                                      |                                                                                                                                             |                                                                                                                                                                                                                     |                                                    |               |                                                                                                                                                        |
| <i>Benennung</i>                                                                                                                          | <i>Beschreibung</i>                                                                                                                         | <i>Bewertung</i>                                                                                                                                                                                                    | <i>Bezug</i>                                       | <i>Quelle</i> | <i>Reduktion</i>                                                                                                                                       |
| selbst thematisiert                                                                                                                       | Anleitungen und Schulungen für TEI-Kodierung, XML-Editor, für viele ungewohnt, fachliche Mehrwerte vermitteln, schon bei Studenten anfangen | Schulungen notwendig, unterschiedliche Vorkenntnisse und Einstellungen / Verständnis als Problematik                                                                                                                | Kollaboration/Kooperation, Produktion/Manipulation | \I9-5\        | K 1.1g<br>Schulungen für technisch weniger versierte Nutzer, Schritt-für-Schritt-Anleitung, Heranführen/Einbinden der Community, didaktischer Prozess, |

## I9 Extraktion

|                                                           |                                                                                                                                                                                                                                                                                                  |                                                         |                                            |        |                                                                                                                                                                                                                                                                                                                                                                                       |
|-----------------------------------------------------------|--------------------------------------------------------------------------------------------------------------------------------------------------------------------------------------------------------------------------------------------------------------------------------------------------|---------------------------------------------------------|--------------------------------------------|--------|---------------------------------------------------------------------------------------------------------------------------------------------------------------------------------------------------------------------------------------------------------------------------------------------------------------------------------------------------------------------------------------|
|                                                           |                                                                                                                                                                                                                                                                                                  |                                                         |                                            |        | <p>Mehrwerte vermitteln, Testprojekte</p> <p><b>Benutzerführung / Erlernbarkeit</b> und<br/>K 1.4a<br/>XML/TEI ist eine Hürde, Unterstützung durch das System ist notwendig, Heranführen/Hilfemenu, Reduzierung der Schwelle, aber keine Vermeidung von spitzen Klammern, Komplexität abbilden, fachliche Mehrwerte vermitteln</p> <p><b>Bedienbarkeit der Auszeichnungsebene</b></p> |
| vom Interviewer thematisiert, vom Befragten konkretisiert | Vereinfachung und intuitive Bedienung mit einer GUI schränkt die Möglichkeiten ein, die Komplexität des Themas/der Edition muss adäquat abgebildet werden, Erkenntnis der Mehrwerte für Fachwissenschaftler, spitze Klammern verstecken ist ein Trugschluss, Komplexität festhalten, z.B. um mit | Komplexität als Mehrwert, Vereinfachung als Trugschluss | Produktion/Manipulation, Rezeption/Zugriff | \I9-6\ | <p>K 1.1.a<br/>zu schwierig / technisch für fachwissenschaftliche Nutzer, steile Lernkurve für herkömmlich Edierende</p> <p><b>Benutzerführung / Erlernbarkeit</b> und<br/>K 1.4a<br/>XML/TEI ist eine Hürde, Unterstützung durch das System ist notwendig,</p>                                                                                                                       |

## I9 Extraktion

|                     |                                                                |                                                                   |  |         |                                                                                                                                                                                                                    |
|---------------------|----------------------------------------------------------------|-------------------------------------------------------------------|--|---------|--------------------------------------------------------------------------------------------------------------------------------------------------------------------------------------------------------------------|
|                     | textgenetischen Fragestellungen daran gehen zu können          |                                                                   |  |         | Heranführen/Hilfemenu, Reduzierung der Schwelle, aber keine Vermeidung von spitzen Klammern, Komplexität abbilden, fachliche Mehrwerte vermitteln<br><br><b>Bedienbarkeit der Auszeichnungsebene</b>               |
| selbst thematisiert | GUI bzw. Usability, Einloggen und navigieren, Projekte anlegen | noch nicht ansprechend, nicht ausgereift, nicht stringent         |  | \I9-18\ | K 1.2c<br>Zurechtfinden, Komponenten und Sichten zuordnen ist am Anfang schwierig (evtl. gewohnte Website- und Ordnerstrukturierung besser)<br><br><b>Orientierung / Übersichtlichkeit / Oberflächengestaltung</b> |
| selbst thematisiert | Eclipse-Oberfläche                                             | für Laien nicht ansprechend, ungewohnt für Geisteswissenschaftler |  | \I9-20\ | K 1.1.a<br>zu schwierig / technisch für fachwissenschaftliche Nutzer, steile Lernkurve für herkömmlich Edierende<br><br><b>Benutzerführung / Erlernbarkeit</b><br>und<br>K 1.2c                                    |

## I9 Extraktion

|                          |                                                                                                                                                                                                                                                                                                                                                                                                                               |                                                                |                         |               |                                                                                                                                                                                                                                                                                                                   |
|--------------------------|-------------------------------------------------------------------------------------------------------------------------------------------------------------------------------------------------------------------------------------------------------------------------------------------------------------------------------------------------------------------------------------------------------------------------------|----------------------------------------------------------------|-------------------------|---------------|-------------------------------------------------------------------------------------------------------------------------------------------------------------------------------------------------------------------------------------------------------------------------------------------------------------------|
|                          |                                                                                                                                                                                                                                                                                                                                                                                                                               |                                                                |                         |               | <p>Zurechtfinden, Komponenten und Sichten zuordnen ist am Anfang schwierig (evtl. gewohnte Website- und Ordnerstrukturierung besser)</p> <p><b>Orientierung / Übersichtlichkeit / Oberflächengestaltung</b></p>                                                                                                   |
| <b>K 2</b>               |                                                                                                                                                                                                                                                                                                                                                                                                                               |                                                                |                         |               |                                                                                                                                                                                                                                                                                                                   |
| <b>Rezeption/Zugriff</b> |                                                                                                                                                                                                                                                                                                                                                                                                                               |                                                                |                         |               |                                                                                                                                                                                                                                                                                                                   |
| <i>Benennung</i>         | <i>Beschreibung</i>                                                                                                                                                                                                                                                                                                                                                                                                           | <i>Bewertung</i>                                               | <i>Bezug</i>            | <i>Quelle</i> | <i>Reduktion</i>                                                                                                                                                                                                                                                                                                  |
| selbst thematisiert      | <p>Hintergrund: besonderes Problem der Musikwissenschaft: Notentext ist eigentlich nicht digital verfügbar, nur gedruckt als Bild, zwar proprietäre Notensatzprogramme und bestimmte Formate sind vorhanden, aber keine maschinellen Analysemöglichkeiten, jedenfalls nicht vergleichbar mit z.B. Texten in der Germanistik, keine Volltextsuchmöglichkeiten oder korpuslinguistische Methoden über alle Musiktitel, neue</p> | <p>ungeahnte Möglichkeiten, potenziell disziplinverändernd</p> | Produktion/Manipulation | <p>\I9-7\</p> | <p>K 2.2a</p> <p>Spezifizierbarkeit des Zugriffs, fachspezifische Zugriffsmöglichkeiten, verschiedene Zugriffsperspektiven durch Auszeichnungen und Präsentationsformen (z.B. parallele Ansicht von Faksimile und Transkription im TBLE)</p> <p><b>Zugriffsformen, Rezeptions- und Recherchemöglichkeiten</b></p> |

## I9 Extraktion

|                                        |                                                                                                                                                                                             |                                                                                                |                                                    |               |                                                                                                                                                                                                                                                                                               |
|----------------------------------------|---------------------------------------------------------------------------------------------------------------------------------------------------------------------------------------------|------------------------------------------------------------------------------------------------|----------------------------------------------------|---------------|-----------------------------------------------------------------------------------------------------------------------------------------------------------------------------------------------------------------------------------------------------------------------------------------------|
|                                        | Fragestellungen wären möglich                                                                                                                                                               |                                                                                                |                                                    |               |                                                                                                                                                                                                                                                                                               |
| selbst thematisiert                    | Verfügbarkeit von Daten, Primärdaten und maschinell verarbeitete Daten                                                                                                                      | zentraler Mehrwert der DH                                                                      | Produktion/Manipulation                            | \I9-21\       | K 2.1b<br>Kostenloser Zugriff auf maschinell verarbeitete Daten und Forschungsergebnisse<br><br><b>Zugriff auf Inhalte</b>                                                                                                                                                                    |
| <b>K 3<br/>Produktion/Manipulation</b> |                                                                                                                                                                                             |                                                                                                |                                                    |               |                                                                                                                                                                                                                                                                                               |
| <i>Benennung</i>                       | <i>Beschreibung</i>                                                                                                                                                                         | <i>Bewertung</i>                                                                               | <i>Bezug</i>                                       | <i>Quelle</i> | <i>Reduktion</i>                                                                                                                                                                                                                                                                              |
| selbst thematisiert                    | besonderes Problem der Musikwissenschaft: Notentext ist eigentlich nicht digital verfügbar, nur gedruckt als Bild, zwar proprietäre Notensatzprogramme und bestimmte Formate sind vorhanden | Potenzial der Erschließung in der Musikwissenschaft, auch im Hinblick auf Analysemöglichkeiten | Rezeption/Zugriff                                  | \I9-7\        | K 3.1c<br>Auszeichnungsmöglichkeiten / Informationsanreicherung zur Bearbeitung neuer Fragestellungen, tiefere Auszeichnung, spezifischere Auszeichnung je nach Forschungsinteresse (z.B. Musikwissenschaft), semantische Auszeichnung, Informationsmodellierung<br><br><b>XML-Produktion</b> |
| selbst thematisiert                    | eigener TG-XML-Editor                                                                                                                                                                       | hätte man anders haben können, unheimlich zeitaufwändig, vielleicht besser als PlugIn          | Kollaboration/Kooperation, Organisation/Verwaltung | \I9-8\        | K 3.1a<br>eigener XML-Editor ist nicht die Stärke von TextGrid, andere sind besser, nicht der richtige                                                                                                                                                                                        |

## I9 Extraktion

|                                                           |                                                                                                                                                                                                                                         |                                                              |                   |         |                                                                                                                                                                                                               |
|-----------------------------------------------------------|-----------------------------------------------------------------------------------------------------------------------------------------------------------------------------------------------------------------------------------------|--------------------------------------------------------------|-------------------|---------|---------------------------------------------------------------------------------------------------------------------------------------------------------------------------------------------------------------|
|                                                           |                                                                                                                                                                                                                                         |                                                              |                   |         | Schwerpunkt<br><b>XML-Produktion</b>                                                                                                                                                                          |
| selbst thematisiert                                       | Text-Bild-Link-Editor                                                                                                                                                                                                                   | interessant für uns, schade, dass er noch nicht fertig war   |                   | \I9-9\  | K 3.3d<br>Verknüpfungsmöglichkeiten Text-Bild, Transkriptions-/Faksimile-Ansicht<br><br><b>Verknüpfungsmöglichkeiten und deren Visualisierung</b>                                                             |
| vom Interviewer thematisiert, vom Befragten konkretisiert | Beziehungen zwischen Briefen, Tagebüchern, Schriften und Werk visualisieren, Wissens-Repräsentation mit Dokumenten als Belegen, Ontologie, Bewertung von Beziehungen                                                                    | großes Ziel, optimal, nicht musikwissenschaftlich spezifisch | Rezeption/Zugriff | \I9-14\ | K 3.3b<br>Visualisierung von Beziehungen (z. B. in Briefnetzen), Mustererkennung<br><br><b>Verknüpfungsmöglichkeiten und deren Visualisierung</b>                                                             |
| selbst thematisiert                                       | Musik-Notation nicht nur eindimensional von links nach rechts, sondern immer auf zwei Ebenen, Melodielinie und Harmonie, XML-Auflösung schwierig aber möglich, jedoch schlecht durch Menschen lesbar, immer spezielle Visualisierung in | zentral, Verbesserungsnotwendigkeit                          | Rezeption/Zugriff | \I9-15\ | K 3.1c<br>Auszeichnungsmöglichkeiten / Informationsanreicherung zur Bearbeitung neuer Fragestellungen, tiefere Auszeichnung, spezifischere Auszeichnung je nach Forschungsinteresse (z.B. Musikwissenschaft), |

## I9 Extraktion

|                     |                                                                                                                                                                   |                  |  |         |                                                                                                                                                                                                                                                                                                                                           |
|---------------------|-------------------------------------------------------------------------------------------------------------------------------------------------------------------|------------------|--|---------|-------------------------------------------------------------------------------------------------------------------------------------------------------------------------------------------------------------------------------------------------------------------------------------------------------------------------------------------|
|                     | Notenform notwendig, wie ein Faksimile zum Transkript, On-the-fly-Anzeige angestrebt                                                                              |                  |  |         | <p>semantische Auszeichnung, Informationsmodellierung</p> <p><b>XML-Produktion</b></p> <p>K 3.3a<br/>Verknüpfungsmöglichkeiten Text-Text (z.B. editionswiss. Kommentarfunktionen, Varianten verknüpfen, Apparat, Quellen/Referenzen, Register, Wörterbücher, Briefe)</p> <p><b>Verknüpfungsmöglichkeiten und deren Visualisierung</b></p> |
| selbst thematisiert | Möglichkeiten, Wissen zu generieren, Sachen anreichern, Bezüge zahlreicher machen, Computer nicht nur als Speichermedium, auf maschinelle Weise Wissen generieren | Potenzial der DH |  | \I9-16\ | <p>K 3.1c<br/>Auszeichnungsmöglichkeiten / Informationsanreicherung zur Bearbeitung neuer Fragestellungen, tiefere Auszeichnung, spezifischere Auszeichnung je nach Forschungsinteresse (z.B. Musikwissenschaft), semantische Auszeichnung, Informationsmodellierung</p>                                                                  |

## I9 Extraktion

|                                                           |                                                             |                                                                        |              |               |                                                                                                                                                          |
|-----------------------------------------------------------|-------------------------------------------------------------|------------------------------------------------------------------------|--------------|---------------|----------------------------------------------------------------------------------------------------------------------------------------------------------|
|                                                           |                                                             |                                                                        |              |               | <b>XML-Produktion</b>                                                                                                                                    |
| selbst thematisiert                                       | eigener TG-XML-Editor                                       | zu viel, besser als PlugIn                                             |              | \I9-19\       | K 3.1a<br>eigener XML-Editor ist nicht die Stärke von TextGrid, andere sind besser, nicht der richtige Schwerpunkt<br><br><b>XML-Produktion</b>          |
| <b>K 4</b><br><b>Modularität/Anpassbarkeit</b>            |                                                             |                                                                        |              |               |                                                                                                                                                          |
| <i>Benennung</i>                                          | <i>Beschreibung</i>                                         | <i>Bewertung</i>                                                       | <i>Bezug</i> | <i>Quelle</i> | <i>Reduktion</i>                                                                                                                                         |
| selbst thematisiert                                       | bestimmte Services für die Grid-Infrastruktur programmieren | zweiter Schritt, wenn Grundlagen der Grid-Infrastruktur verfügbar sind |              | \I9-11\       | K 4.2a<br>Anschließbarkeit und Kombinierbarkeit von Tools und Services, auch von selbstentwickelten – modulares Konzept<br><br><b>Tools und Services</b> |
| vom Interviewer thematisiert, vom Befragten konkretisiert | Disziplinspezifisches selbst entwickeln                     | zweiter Schritt, Voraussetzung Architektur                             |              | \I9-12\       | K 4.2a<br>Anschließbarkeit und Kombinierbarkeit von Tools und Services, auch von selbstentwickelten – modulares Konzept<br><br><b>Tools und Services</b> |
| <b>K 5</b><br><b>Kollaboration/Kooperation</b>            |                                                             |                                                                        |              |               |                                                                                                                                                          |



## I9 Extraktion

| <i>Benennung</i>                                          | <i>Beschreibung</i>                                                                                                                                                                                                                                               | <i>Bewertung</i>                                                                            | <i>Bezug</i>                               | <i>Quelle</i> | <i>Reduktion</i>                                                                                                                                                                          |
|-----------------------------------------------------------|-------------------------------------------------------------------------------------------------------------------------------------------------------------------------------------------------------------------------------------------------------------------|---------------------------------------------------------------------------------------------|--------------------------------------------|---------------|-------------------------------------------------------------------------------------------------------------------------------------------------------------------------------------------|
| vom Interviewer thematisiert, vom Befragten konkretisiert | projektintern von verteilten Arbeitsstellen aus auf Quellen zugreifen, Repository, in dem alles drin ist und auf das alle Zugriff haben, Wagenheber-Prinzip auf höherer Ebene: auch andere können darauf zugreifen, auf die Daten direkt, selbst Daten einspeisen | wäre super, technisch auch auf projektübergreifender Ebene kein Problem                     | Rezeption/Zugriff, Produktion/Manipulation | \I9-2\        | K 5.1a<br>Austausch von Ressourcen, Nachnutzung<br><br><b>Austausch von Inhalten und Werkzeugen</b>                                                                                       |
| vom Interviewer thematisiert, vom Befragten konkretisiert | Umdenkprozess notwendig im Hinblick auf das Freigeben von Daten, auch über Rechteverwaltung geregelt, frühe Publikation in unfertigem Zustand, Rohdaten publizieren                                                                                               | problematisch, mentaler Wandel notwendig, bezogen auf Wagenheberprinzip wünschenswert       | Produktion/Manipulation, Rezeption/Zugriff | \I9-3\        | K 5.1a<br>Austausch von Ressourcen, Nachnutzung und<br>K 5.1b<br>Austausch von Arbeits- bzw. Forschungsergebnissen, Bereitschaft dazu<br><br><b>Austausch von Inhalten und Werkzeugen</b> |
| vom Interviewer thematisiert, vom Befragten konkretisiert | Überzeugungsarbeit im Hinblick auf Datenaustausch und Nutzung von DH-Möglichkeiten wie in TG, für bestimmte Fragestellungen digitale Tools nutzen, Bedarf an kritischer Masse an                                                                                  | Umdenken wünschenswert, aber problematisch, Generationensache, Überzeugungsarbeit notwendig | Produktion/Manipulation, Rezeption/Zugriff | \I9-4\        | K 5.3b<br>Community-Building erforderlich, Umdenken erforderlich, durch Überzeugungsarbeit, Veranstaltungen und Erfahrungsaustausch anregen                                               |

## I9 Extraktion

|                                        |                                                                                                                          |                         |                                                    |               |                                                                                                                                                                                                            |
|----------------------------------------|--------------------------------------------------------------------------------------------------------------------------|-------------------------|----------------------------------------------------|---------------|------------------------------------------------------------------------------------------------------------------------------------------------------------------------------------------------------------|
|                                        | Material                                                                                                                 |                         |                                                    |               | <b>Community-Building-Aspekte</b>                                                                                                                                                                          |
| selbst thematisiert                    | interdisziplinäres Zusammenrücken                                                                                        | großes Potenzial der DH |                                                    | \I9-21\       | K 5.2c<br>Interdisziplinäre Zusammenarbeit<br><br><b>Zusammenarbeit</b>                                                                                                                                    |
| <b>K 6<br/>Organisation/Verwaltung</b> |                                                                                                                          |                         |                                                    |               |                                                                                                                                                                                                            |
| <i>Benennung</i>                       | <i>Beschreibung</i>                                                                                                      | <i>Bewertung</i>        | <i>Bezug</i>                                       | <i>Quelle</i> | <i>Reduktion</i>                                                                                                                                                                                           |
| selbst thematisiert                    | Grid-Gedanke und Architektur bzw. Repositorien mit Benutzerverwaltung, verschiedene Projektpartner im Boot               | faszinierend            | Kollaboration/Kooperation, Produktion/Manipulation | \I9-8\        | K 6.2a<br>Workflow-Organisation, Projekt-Verwaltung<br><br><b>Organisation und Verwaltung von Arbeitsprozessen</b>                                                                                         |
| selbst thematisiert                    | Gridarchitektur nutzen: Archivierung, Langzeitverfügbarkeit, persistente Identifizierung, Verlinkung, Benutzerverwaltung | ganz zentral            | Kollaboration/Kooperation, Produktion/Manipulation | \I9-11\       | K 6.1b<br>Datenspeicherung und –verwaltung, Langzeitarchivierung, verbunden mit Bearbeitungsmöglichkeiten und Nachnutzung und<br>K 6.1c<br>Adressierung, Zitierbarkeit, Urheberrecht, Leistungsanerkennung |

## I9 Extraktion

|                     |                                                                                     |                                                                                                    |                           |         |                                                                                                                                                                                                                                                                                                                     |
|---------------------|-------------------------------------------------------------------------------------|----------------------------------------------------------------------------------------------------|---------------------------|---------|---------------------------------------------------------------------------------------------------------------------------------------------------------------------------------------------------------------------------------------------------------------------------------------------------------------------|
|                     |                                                                                     |                                                                                                    |                           |         | <b>Organisation und Verwaltung von Inhalten</b>                                                                                                                                                                                                                                                                     |
| selbst thematisiert | einheitliche Struktur, bisher macht jeder seinen eigenen Senf                       | Wäre extrem nützlich                                                                               | Kollaboration/Kooperation | \I9-12\ | <p>K 6.1b<br/>Datenspeicherung und –verwaltung, Langzeitarchivierung, verbunden mit Bearbeitungsmöglichkeiten und Nachnutzung</p> <p><b>Organisation und Verwaltung von Inhalten</b></p> <p>K 6.2a<br/>Workflow-Organisation, Projekt-Verwaltung</p> <p><b>Organisation und Verwaltung von Arbeitsprozessen</b></p> |
| selbst thematisiert | Strukturierung, Speicherung und Verlinkung, Benutzergruppen, Ordnung, Versionierung | zunächst wichtig, evtl. nur Zwischenstadium bis sich alle auf die Datenfreigabe eingelassen haben? | Kollaboration/Kooperation | \I9-13\ | <p>K 6.1b<br/>Datenspeicherung und –verwaltung, Langzeitarchivierung, verbunden mit Bearbeitungsmöglichkeiten und Nachnutzung</p> <p><b>Organisation und</b></p>                                                                                                                                                    |

## I9 Extraktion

|                     |             |                                                       |  |         |                                                                                                                                                                                                                                                                                                                        |
|---------------------|-------------|-------------------------------------------------------|--|---------|------------------------------------------------------------------------------------------------------------------------------------------------------------------------------------------------------------------------------------------------------------------------------------------------------------------------|
|                     |             |                                                       |  |         | <b>Verwaltung von Inhalten</b><br><br>K 6.2a<br>Workflow-Organisation,<br>Projekt-Verwaltung<br><br><b>Organisation und Verwaltung von Arbeitsprozessen</b>                                                                                                                                                            |
| selbst thematisiert | Architektur | hat als Demo bis auf ein paar Patzer gut funktioniert |  | \I9-17\ | K 6.1b<br>Datenspeicherung und –verwaltung,<br>Langzeitarchivierung,<br>verbunden mit Bearbeitungsmöglichkeiten und<br>Nachnutzung<br><br><b>Organisation und Verwaltung von Inhalten</b><br><br>K 6.2a<br>Workflow-Organisation,<br>Projekt-Verwaltung<br><br><b>Organisation und Verwaltung von Arbeitsprozessen</b> |
